# Supplementary material
Source: Research Square preprint supplement (doi:10.21203/rs.3.rs-9887104/v1)
Supplement: Supplementary file 1 [file c20e921cd0cebaac57049326.xlsx]

## Sheet: Supp Table S1
Table S1. Exome capture sequencing (ECS) data processing summary.
Step	Value
Samples (total)	602
Mean raw reads per sample (range) [n = 18 samples available]	2.8 (0.7–5.2)
Mean trimmed reads per sample, M (range) [n = 18 samples available]	2.8 (0.7–5.1)
Reads retained after trimming and quality filtering (%)	97.6
SNPs called (unfiltered)	83,368,570
SNPs after quality + MAF > 0.05 filter	488.826
SNPs after cohort-spliting — Breeding cohort (n = 209)	450.947
SNPs after cohort-spliting — Natural cohort (n = 393)	462.617
SNPs after LD pruning — Breeding cohort (n = 209)	120.923
SNPs after LD pruning — Natural cohort (n = 393)	132.708
SNP: single nucleotide polymorphism; MAF: minimum allele frequency; LD: linkage disequilibrium

## Sheet: Supp Table S2
Table S2. Targeted bisulfite sequencing (TBS) data summary by cohort and cytosine context.
Cohort	Context	N	Raw sites (a)	Cov. sites (b)	After unite (c)	MEF sites (d)	SW p	Levene p	ANOVA p	Sig. pairs (e)	SVMPs (f)	Robust sites (g)
Breeding	CpG	209	125.401	92.987	2.667	855	1.57e-13	1.39e-01	9.91e-07	14 / 136	616	1.204
Natural	CpG	393	121.297	87.66	2.229	829	1.16e-06	1.92e-01	4.42e-06	8 / 300	3	2.387
Breeding	CHG	209	267.521	189.948	48.022	3.871	3.23e-11	1.23e-03	8.21e-48	56 / 136	2.224	1.138
Natural	CHG	393	261.329	179.095	42.366	2.841	3.55e-01	2.57e-01	4.78e-06	6 / 300	0	2.66
Breeding	CHH	209	925.681	659.784	514.117	8.496	2.07e-14	2.54e-01	1.53e-09	18 / 136	2.389	769
Natural	CHH	393	885.239	614.103	475.621	6.143	6.50e-03	9.67e-01	6.25e-10	12 / 300	3	1.797
(a) Median cytosine sites per sample before coverage filtering.
(b) Median sites per sample after 5–50× coverage filter.
(c) Sites present in at least min.per.group samples (after unite()).
(d) Sites with methylation effect fraction (MEF) > 5%.
(e) Significant TukeyHSD pairwise comparisons (p adj < 0.05) / total pairs.
(f) Loci with significant Kruskal-Wallis test (BH-adjusted q < 0.05).
(g) Robust cis-meQTL sites identified by both GENESIS and MatrixEQTL.
N: number of samples; MEF: minimum epiallele frequenc; SW p: Shapiro-Wilk p-value; SVMP: significantly variable methylation position

## Sheet: Supp Table S3
Table S3. Selected SVMPs with annotation
cohort	marker_id	Context	chr	start	end	loc	p	padj	H	eps2	n	k
breeding	CHG|PA_chr08:1077272193-1077272193	CHG	PA_chr08	1077272193	1077272193	PA_chr08:1077272193-1077272193	7.1289e-20	2.60942e-16	127.314	0.808011	155	16
breeding	CHG|PA_chr08:1077272182-1077272182	CHG	PA_chr08	1077272182	1077272182	PA_chr08:1077272182-1077272182	2.56156e-19	2.60942e-16	124.466	0.781903	156	16
breeding	CHG|PA_chr08:1077272185-1077272185	CHG	PA_chr08	1077272185	1077272185	PA_chr08:1077272185-1077272185	1.76379e-19	2.60942e-16	125.298	0.776745	158	16
breeding	CHG|PA_chr08:1077272173-1077272173	CHG	PA_chr08	1077272173	1077272173	PA_chr08:1077272173-1077272173	2.69637e-19	2.60942e-16	121.878	0.770556	155	15
breeding	CHG|PA_chr02:825981035-825981035	CHG	PA_chr02	825981035	825981035	PA_chr02:825981035-825981035	7.66966e-19	5.93785e-16	122.02	0.769925	155	16
breeding	CHG|PA_chr07:1089183350-1089183350	CHG	PA_chr07	1089183350	1089183350	PA_chr07:1089183350-1089183350	1.28392e-18	8.28341e-16	120.868	0.740335	159	16
breeding	CHG|PA_chr03:277543741-277543741	CHG	PA_chr03	277543741	277543741	PA_chr03:277543741-277543741	1.86318e-18	1.03034e-15	117.59	0.686025	166	15
breeding	CHG|PA_chr02:825981030-825981030	CHG	PA_chr02	825981030	825981030	PA_chr02:825981030-825981030	2.69524e-18	1.30416e-15	119.208	0.718678	161	16
breeding	CHG|PA_chr09:764541778-764541778	CHG	PA_chr09	764541778	764541778	PA_chr09:764541778-764541778	3.32052e-18	1.33865e-15	121.136	0.745647	158	17
breeding	CHG|PA_chr11_cUL0020:5948372-5948372	CHG	PA_chr11_cUL0020	5948372	5948372	PA_chr11_cUL0020:5948372-5948372	3.45814e-18	1.33865e-15	118.65	0.686423	167	16
breeding	CHG|PA_chr08:1077272152-1077272152	CHG	PA_chr08	1077272152	1077272152	PA_chr08:1077272152-1077272152	7.44069e-18	2.61845e-15	114.508	0.717911	155	15
breeding	CHG|PA_chr10:505101723-505101723	CHG	PA_chr10	505101723	505101723	PA_chr10:505101723-505101723	8.49515e-18	2.74039e-15	119.015	0.700779	164	17
breeding	CHG|PA_chr01:1474160666-1474160666	CHG	PA_chr01	1474160666	1474160666	PA_chr01:1474160666-1474160666	9.6007e-18	2.85879e-15	118.738	0.744477	155	17
breeding	CHG|PA_chr10:505101873-505101873	CHG	PA_chr10	505101873	505101873	PA_chr10:505101873-505101873	1.62623e-17	4.49652e-15	115.174	0.690857	161	16
breeding	CHG|PA_chr11_cUL0020:5948363-5948363	CHG	PA_chr11_cUL0020	5948363	5948363	PA_chr11_cUL0020:5948363-5948363	5.73244e-17	1.47935e-14	114.687	0.666806	165	17
breeding	CHG|PA_chr12:1186944632-1186944632	CHG	PA_chr12	1186944632	1186944632	PA_chr12:1186944632-1186944632	7.55207e-17	1.82713e-14	114.061	0.649408	168	17
breeding	CHG|PA_chr02:1214275531-1214275531	CHG	PA_chr02	1214275531	1214275531	PA_chr02:1214275531-1214275531	8.23775e-17	1.87578e-14	113.863	0.719581	153	17
breeding	CHG|PA_chr08:213065839-213065839	CHG	PA_chr08	213065839	213065839	PA_chr08:213065839-213065839	9.48462e-17	2.03972e-14	111.2	0.702187	153	16
breeding	CHG|PA_chr05:685724004-685724004	CHG	PA_chr05	685724004	685724004	PA_chr05:685724004-685724004	3.14591e-16	6.08891e-14	110.81	0.663007	160	17
breeding	CHG|PA_chr11_cUL0020:5948359-5948359	CHG	PA_chr11_cUL0020	5948359	5948359	PA_chr11_cUL0020:5948359-5948359	3.05887e-16	6.08891e-14	110.874	0.645402	164	17
breeding	CHG|PA_chr10:678995995-678995995	CHG	PA_chr10	678995995	678995995	PA_chr10:678995995-678995995	4.91877e-16	9.06694e-14	105.119	0.64168	157	15
breeding	CHG|PA_chr06_cUL0046:291468-291468	CHG	PA_chr06_cUL0046	291468	291468	PA_chr06_cUL0046:291468-291468	5.23322e-16	9.20809e-14	109.647	0.714866	148	17
breeding	CHG|PA_chr11_cUL0020:5948522-5948522	CHG	PA_chr11_cUL0020	5948522	5948522	PA_chr11_cUL0020:5948522-5948522	5.74838e-16	9.67477e-14	109.433	0.667377	157	17
breeding	CHG|PA_chr11_cUL0020:5948438-5948438	CHG	PA_chr11_cUL0020	5948438	5948438	PA_chr11_cUL0020:5948438-5948438	6.2221e-16	1.00357e-13	109.252	0.690753	152	17
breeding	CHG|PA_chr02:1214275568-1214275568	CHG	PA_chr02	1214275568	1214275568	PA_chr02:1214275568-1214275568	1.09179e-15	1.64975e-13	107.964	0.707419	147	17
breeding	CHG|PA_chr01:1474160729-1474160729	CHG	PA_chr01	1474160729	1474160729	PA_chr01:1474160729-1474160729	1.10807e-15	1.64975e-13	103.288	0.676423	147	15
breeding	CHG|PA_chr10:447356824-447356824	CHG	PA_chr10	447356824	447356824	PA_chr10:447356824-447356824	1.23444e-15	1.74547e-13	107.683	0.705255	147	17
breeding	CHG|PA_chr04:659753497-659753497	CHG	PA_chr04	659753497	659753497	PA_chr04:659753497-659753497	1.26637e-15	1.74547e-13	107.625	0.636282	161	17
breeding	CHG|PA_chr02:825980785-825980785	CHG	PA_chr02	825980785	825980785	PA_chr02:825980785-825980785	1.30764e-15	1.74547e-13	107.551	0.622796	164	17
breeding	CHG|PA_chr11_cUL0020:5948471-5948471	CHG	PA_chr11_cUL0020	5948471	5948471	PA_chr11_cUL0020:5948471-5948471	1.70118e-15	2.19509e-13	106.948	0.688998	149	17
breeding	CHG|PA_chr01:1474160709-1474160709	CHG	PA_chr01	1474160709	1474160709	PA_chr01:1474160709-1474160709	1.88027e-15	2.30949e-13	102.094	0.667376	147	15
breeding	CHG|PA_chr04:659753553-659753553	CHG	PA_chr04	659753553	659753553	PA_chr04:659753553-659753553	1.90916e-15	2.30949e-13	106.683	0.604554	167	17
breeding	CHG|PA_chr09:381223862-381223862	CHG	PA_chr09	381223862	381223862	PA_chr09:381223862-381223862	1.98783e-15	2.33179e-13	101.968	0.594377	163	15
breeding	CHG|PA_chr02:1214275579-1214275579	CHG	PA_chr02	1214275579	1214275579	PA_chr02:1214275579-1214275579	2.33222e-15	2.57944e-13	106.224	0.694027	147	17
breeding	CHG|PA_chr11:953380628-953380628	CHG	PA_chr11	953380628	953380628	PA_chr11:953380628-953380628	2.3303e-15	2.57944e-13	106.225	0.678387	150	17
breeding	CHG|PA_chr09:381223842-381223842	CHG	PA_chr09	381223842	381223842	PA_chr09:381223842-381223842	2.51878e-15	2.70839e-13	101.433	0.579024	166	15
breeding	CHG|PA_chr06:499343593-499343593	CHG	PA_chr06	499343593	499343593	PA_chr06:499343593-499343593	2.72561e-15	2.85157e-13	105.866	0.6808	149	17
breeding	CHG|PA_chr02:825980762-825980762	CHG	PA_chr02	825980762	825980762	PA_chr02:825980762-825980762	3.18149e-15	3.24093e-13	105.51	0.600739	166	17
breeding	CHG|PA_chr07:108815654-108815654	CHG	PA_chr07	108815654	108815654	PA_chr07:108815654-108815654	3.84886e-15	3.82024e-13	105.072	0.614291	162	17
breeding	CHG|PA_chr02:75292882-75292882	CHG	PA_chr02	75292882	75292882	PA_chr02:75292882-75292882	3.95272e-15	3.82524e-13	102.731	0.581	167	16
breeding	CHG|PA_chr11:41917275-41917275	CHG	PA_chr11	41917275	41917275	PA_chr11:41917275-41917275	4.54231e-15	4.28861e-13	104.691	0.595242	166	17
breeding	CHG|PA_chr09_cUL0024:2083697-2083697	CHG	PA_chr09_cUL0024	2083697	2083697	PA_chr09_cUL0024:2083697-2083697	4.75583e-15	4.38329e-13	104.585	0.671102	149	17
breeding	CHG|PA_chr11_cUL0020:5948489-5948489	CHG	PA_chr11_cUL0020	5948489	5948489	PA_chr11_cUL0020:5948489-5948489	5.42231e-15	4.88134e-13	104.283	0.658832	151	17
breeding	CHG|PA_chr03:1162809282-1162809282	CHG	PA_chr03	1162809282	1162809282	PA_chr03:1162809282-1162809282	6.09582e-15	5.35115e-13	99.4309	0.628168	151	15
breeding	CHG|PA_chr12:1197935482-1197935482	CHG	PA_chr12	1197935482	1197935482	PA_chr12:1197935482-1197935482	6.33724e-15	5.35115e-13	103.924	0.610586	161	17
breeding	CHG|PA_chr11:501666042-501666042	CHG	PA_chr11	501666042	501666042	PA_chr11:501666042-501666042	6.3589e-15	5.35115e-13	103.917	0.552934	176	17
breeding	CHG|PA_chr02:1214275686-1214275686	CHG	PA_chr02	1214275686	1214275686	PA_chr02:1214275686-1214275686	6.50741e-15	5.35961e-13	103.863	0.675872	147	17
breeding	CHG|PA_chr01:1522867676-1522867676	CHG	PA_chr01	1522867676	1522867676	PA_chr01:1522867676-1522867676	6.70833e-15	5.40999e-13	103.793	0.609675	161	17
breeding	CHG|PA_chr02:1214275507-1214275507	CHG	PA_chr02	1214275507	1214275507	PA_chr02:1214275507-1214275507	6.98704e-15	5.51976e-13	103.699	0.617602	159	17
breeding	CHG|PA_chr10:505101825-505101825	CHG	PA_chr10	505101825	505101825	PA_chr10:505101825-505101825	1.02668e-14	7.79272e-13	98.2478	0.589145	158	15
breeding	CHH|PA_chr06:563557726-563557726	CHH	PA_chr06	563557726	563557726	PA_chr06:563557726-563557726	7.50637e-22	6.37742e-18	137.395	0.832622	163	16
breeding	CHH|PA_chr01:709206218-709206218	CHH	PA_chr01	709206218	709206218	PA_chr01:709206218-709206218	4.86451e-20	2.06644e-16	125.664	0.791941	156	15
breeding	CHH|PA_chr11_cUL0024:3430021-3430021	CHH	PA_chr11_cUL0024	3430021	3430021	PA_chr11_cUL0024:3430021-3430021	3.26735e-19	9.25315e-16	126.354	0.829727	150	17
breeding	CHH|PA_chr03:1315498079-1315498079	CHH	PA_chr03	1315498079	1315498079	PA_chr03:1315498079-1315498079	4.07986e-18	8.66562e-15	120.671	0.670971	173	17
breeding	CHH|PA_chr12:671454756-671454756	CHH	PA_chr12	671454756	671454756	PA_chr12:671454756-671454756	7.72643e-18	1.31288e-14	114.424	0.656363	168	15
breeding	CHH|PA_chr03:734927835-734927835	CHH	PA_chr03	734927835	734927835	PA_chr03:734927835-734927835	9.78461e-18	1.3855e-14	118.695	0.749598	154	17
breeding	CHH|PA_chr02:550066142-550066142	CHH	PA_chr02	550066142	550066142	PA_chr02:550066142-550066142	1.86448e-17	2.26294e-14	112.458	0.698282	156	15
breeding	CHH|PA_chr09:1030241069-1030241069	CHH	PA_chr09	1030241069	1030241069	PA_chr09:1030241069-1030241069	2.84298e-17	3.01925e-14	113.917	0.77279	144	16
breeding	CHH|PA_chr01:1082272332-1082272332	CHH	PA_chr01	1082272332	1082272332	PA_chr01:1082272332-1082272332	9.16286e-17	8.03156e-14	111.278	0.707924	152	16
breeding	CHH|PA_chr03:19420016-19420016	CHH	PA_chr03	19420016	19420016	PA_chr03:19420016-19420016	1.03987e-16	8.03156e-14	110.992	0.695593	154	16
breeding	CHH|PA_chr09:859424424-859424424	CHH	PA_chr09	859424424	859424424	PA_chr09:859424424-859424424	9.87584e-17	8.03156e-14	113.45	0.620704	174	17
breeding	CHH|PA_chr07:954806177-954806177	CHH	PA_chr07	954806177	954806177	PA_chr07:954806177-954806177	1.87368e-16	1.32657e-13	111.992	0.666611	161	17
breeding	CHH|PA_chr03:1315252863-1315252863	CHH	PA_chr03	1315252863	1315252863	PA_chr03:1315252863-1315252863	2.13872e-16	1.39774e-13	111.69	0.869913	127	17
breeding	CHH|PA_chr12:269300604-269300604	CHH	PA_chr12	269300604	269300604	PA_chr12:269300604-269300604	4.13057e-16	2.45716e-13	107.87	0.682865	152	16
breeding	CHH|PA_chr07_cUL0050:7142310-7142310	CHH	PA_chr07_cUL0050	7142310	7142310	PA_chr07_cUL0050:7142310-7142310	4.33821e-16	2.45716e-13	105.401	0.677047	150	15
breeding	CHH|PA_chr07:1140555057-1140555057	CHH	PA_chr07	1140555057	1140555057	PA_chr07:1140555057-1140555057	1.67923e-15	8.76799e-13	104.683	0.636047	157	16
breeding	CHH|PA_chr12:1290493608-1290493608	CHH	PA_chr12	1290493608	1290493608	PA_chr12:1290493608-1290493608	1.75442e-15	8.76799e-13	106.877	0.63109	161	17
breeding	CHH|PA_chr06:673083488-673083488	CHH	PA_chr06	673083488	673083488	PA_chr06:673083488-673083488	2.17263e-15	9.82929e-13	104.096	0.674969	148	16
breeding	CHH|PA_chr01:882439369-882439369	CHH	PA_chr01	882439369	882439369	PA_chr01:882439369-882439369	2.19817e-15	9.82929e-13	106.359	0.58675	171	17
breeding	CHH|PA_chr08:389105805-389105805	CHH	PA_chr08	389105805	389105805	PA_chr08:389105805-389105805	2.43067e-15	1.03255e-12	103.84	0.722278	139	16
breeding	CHH|PA_chr01:1358479142-1358479142	CHH	PA_chr01	1358479142	1358479142	PA_chr01:1358479142-1358479142	3.06454e-15	1.22492e-12	103.312	0.663998	149	16
breeding	CHH|PA_chr07:1347637775-1347637775	CHH	PA_chr07	1347637775	1347637775	PA_chr07:1347637775-1347637775	3.17189e-15	1.22492e-12	105.517	0.630402	159	17
breeding	CHH|PA_chr01:334135666-334135666	CHH	PA_chr01	334135666	334135666	PA_chr01:334135666-334135666	5.79694e-15	1.75896e-12	104.13	0.740585	136	17
breeding	CHH|PA_chr05:780225154-780225154	CHH	PA_chr05	780225154	780225154	PA_chr05:780225154-780225154	5.77496e-15	1.75896e-12	104.138	0.728416	138	17
breeding	CHH|PA_chr11:249037636-249037636	CHH	PA_chr11	249037636	249037636	PA_chr11:249037636-249037636	5.27937e-15	1.75896e-12	104.345	0.701151	143	17
breeding	CHH|PA_chr03_cUL0024:392069-392069	CHH	PA_chr03_cUL0024	392069	392069	PA_chr03_cUL0024:392069-392069	5.70623e-15	1.75896e-12	101.892	0.668403	146	16
breeding	CHH|PA_chr03:876143761-876143761	CHH	PA_chr03	876143761	876143761	PA_chr03:876143761-876143761	4.91388e-15	1.75896e-12	104.51	0.636764	156	17
breeding	CHH|PA_chr05:1056636788-1056636788	CHH	PA_chr05	1056636788	1056636788	PA_chr05:1056636788-1056636788	5.63215e-15	1.75896e-12	101.922	0.595358	162	16
breeding	CHH|PA_chr12:269300603-269300603	CHH	PA_chr12	269300603	269300603	PA_chr12:269300603-269300603	1.24969e-14	3.66116e-12	100.099	0.586888	161	16
breeding	CHH|PA_chr08:128750308-128750308	CHH	PA_chr08	128750308	128750308	PA_chr08:128750308-128750308	1.30311e-14	3.69041e-12	100.003	0.664084	144	16
breeding	CHH|PA_chr10:950609008-950609008	CHH	PA_chr10	950609008	950609008	PA_chr10:950609008-950609008	1.79179e-14	4.7572e-12	101.526	0.606566	158	17
breeding	CHH|PA_chr11:278480686-278480686	CHH	PA_chr11	278480686	278480686	PA_chr11:278480686-278480686	1.75634e-14	4.7572e-12	99.3186	0.598004	157	16
breeding	CHH|PA_chr02:959909622-959909622	CHH	PA_chr02	959909622	959909622	PA_chr02:959909622-959909622	2.2363e-14	5.58812e-12	101.013	0.634427	151	17
breeding	CHH|PA_chr11:88814257-88814257	CHH	PA_chr11	88814257	88814257	PA_chr11:88814257-88814257	2.1956e-14	5.58812e-12	101.056	0.563283	168	17
breeding	CHH|PA_chr12:489157643-489157643	CHH	PA_chr12	489157643	489157643	PA_chr12:489157643-489157643	2.31653e-14	5.62321e-12	96.3972	0.619528	148	15
breeding	CHH|PA_chr05:1056636948-1056636948	CHH	PA_chr05	1056636948	1056636948	PA_chr05:1056636948-1056636948	2.67603e-14	6.31544e-12	96.0686	0.56599	160	15
breeding	CHH|PA_chr03:612414269-612414269	CHH	PA_chr03	612414269	612414269	PA_chr03:612414269-612414269	3.14756e-14	7.22747e-12	95.6988	0.729454	127	15
breeding	CHH|PA_chr11:721603278-721603278	CHH	PA_chr11	721603278	721603278	PA_chr11:721603278-721603278	3.30013e-14	7.3784e-12	100.112	0.613958	154	17
breeding	CHH|PA_chr09:1087884370-1087884370	CHH	PA_chr09	1087884370	1087884370	PA_chr09:1087884370-1087884370	4.34115e-14	9.45704e-12	97.2399	0.567172	161	16
breeding	CHH|PA_chr02:550145719-550145719	CHH	PA_chr02	550145719	550145719	PA_chr02:550145719-550145719	4.81396e-14	1.02249e-11	99.2369	0.558637	166	17
breeding	CHH|PA_chr02:1087867754-1087867754	CHH	PA_chr02	1087867754	1087867754	PA_chr02:1087867754-1087867754	6.05529e-14	1.25477e-11	98.7045	0.71297	133	17
breeding	CHH|PA_chr09:284303417-284303417	CHH	PA_chr09	284303417	284303417	PA_chr09:284303417-284303417	6.71578e-14	1.35851e-11	98.4641	0.763556	125	17
breeding	CHH|PA_chr02:130565815-130565815	CHH	PA_chr02	130565815	130565815	PA_chr02:130565815-130565815	7.12235e-14	1.40724e-11	98.3275	0.691828	136	17
breeding	CHH|PA_chr12:158066060-158066060	CHH	PA_chr12	158066060	158066060	PA_chr12:158066060-158066060	7.34593e-14	1.41843e-11	93.7643	0.745461	122	15
breeding	CHH|PA_chr10:725922020-725922020	CHH	PA_chr10	725922020	725922020	PA_chr10:725922020-725922020	7.60504e-14	1.43583e-11	98.1751	0.530162	172	17
breeding	CHH|PA_chr03:653915273-653915273	CHH	PA_chr03	653915273	653915273	PA_chr03:653915273-653915273	7.8978e-14	1.45869e-11	98.0874	0.626621	148	17
breeding	CHH|PA_chr04:300604985-300604985	CHH	PA_chr04	300604985	300604985	PA_chr04:300604985-300604985	8.65498e-14	1.56453e-11	97.8745	0.731023	129	17
breeding	CHH|PA_chr09:1197405640-1197405640	CHH	PA_chr09	1197405640	1197405640	PA_chr09:1197405640-1197405640	9.49354e-14	1.64606e-11	97.6595	0.600437	153	17
breeding	CHH|PA_chr01:1434369494-1434369494	CHH	PA_chr01	1434369494	1434369494	PA_chr01:1434369494-1434369494	9.38284e-14	1.64606e-11	97.6868	0.579339	158	17
breeding	CHH|PA_chr02:143616780-143616780	CHH	PA_chr02	143616780	143616780	PA_chr02:143616780-143616780	1.00744e-13	1.71184e-11	95.3002	0.538928	165	16
breeding	CpG|PA_chr03:449406635-449406635	CpG	PA_chr03	449406635	449406635	PA_chr03:449406635-449406635	3.35813e-21	2.8712e-18	131.55	0.758389	170	15
breeding	CpG|PA_chr01:1357905502-1357905502	CpG	PA_chr01	1357905502	1357905502	PA_chr01:1357905502-1357905502	1.07338e-20	4.58871e-18	131.515	0.756593	170	16
breeding	CpG|PA_chr12:645993910-645993910	CpG	PA_chr12	645993910	645993910	PA_chr12:645993910-645993910	6.70095e-19	1.90977e-16	119.86	0.691898	168	15
breeding	CpG|PA_chr08:917281716-917281716	CpG	PA_chr08	917281716	917281716	PA_chr08:917281716-917281716	1.26219e-18	2.69794e-16	118.455	0.665319	172	15
breeding	CpG|PA_chr08:288811429-288811429	CpG	PA_chr08	288811429	288811429	PA_chr08:288811429-288811429	1.85004e-18	3.16356e-16	117.606	0.672763	169	15
breeding	CpG|PA_chr08:305531154-305531154	CpG	PA_chr08	305531154	305531154	PA_chr08:305531154-305531154	3.68242e-18	5.24744e-16	116.074	0.650156	172	15
breeding	CpG|PA_chr07_sUL006:868917-868917	CpG	PA_chr07_sUL006	868917	868917	PA_chr07_sUL006:868917-868917	7.21121e-18	8.80798e-16	114.577	0.640621	172	15
breeding	CpG|PA_chr09:542169216-542169216	CpG	PA_chr09	542169216	542169216	PA_chr09:542169216-542169216	1.01086e-17	9.6032e-16	118.621	0.670727	170	17
breeding	CpG|PA_chr03:1349506407-1349506407	CpG	PA_chr03	1349506407	1349506407	PA_chr03:1349506407-1349506407	9.32566e-18	9.6032e-16	118.804	0.667556	171	17
breeding	CpG|PA_chr06:398051005-398051005	CpG	PA_chr06	398051005	398051005	PA_chr06:398051005-398051005	2.5571e-17	2.13442e-15	116.519	0.665692	168	17
breeding	CpG|PA_chr09:284258492-284258492	CpG	PA_chr09	284258492	284258492	PA_chr09:284258492-284258492	2.74604e-17	2.13442e-15	116.358	0.651674	171	17
breeding	CpG|PA_chr09:1305771-1305771	CpG	PA_chr09	1305771	1305771	PA_chr09:1305771-1305771	3.92476e-17	2.79639e-15	113.191	0.613691	176	16
breeding	CpG|PA_chr03_sUL002:7188395-7188395	CpG	PA_chr03_sUL002	7188395	7188395	PA_chr03_sUL002:7188395-7188395	2.11291e-16	1.38964e-14	109.388	0.608957	171	16
breeding	CpG|PA_chr02:412648538-412648538	CpG	PA_chr02	412648538	412648538	PA_chr02:412648538-412648538	2.69221e-16	1.64417e-14	111.165	0.617957	171	17
breeding	CpG|PA_chr04_sUL002:16935787-16935787	CpG	PA_chr04_sUL002	16935787	16935787	PA_chr04_sUL002:16935787-16935787	5.20842e-16	2.9688e-14	109.658	0.59655	174	17
breeding	CpG|PA_chr11:554760545-554760545	CpG	PA_chr11	554760545	554760545	PA_chr11:554760545-554760545	7.27462e-16	3.61195e-14	106.585	0.598595	169	16
breeding	CpG|PA_chr07:1223867794-1223867794	CpG	PA_chr07	1223867794	1223867794	PA_chr07:1223867794-1223867794	6.91297e-16	3.61195e-14	106.701	0.59546	170	16
breeding	CpG|PA_chr01:886182754-886182754	CpG	PA_chr01	886182754	886182754	PA_chr01:886182754-886182754	7.6041e-16	3.61195e-14	106.484	0.594055	170	16
breeding	CpG|PA_chr12:484098785-484098785	CpG	PA_chr12	484098785	484098785	PA_chr12:484098785-484098785	8.5025e-16	3.82613e-14	106.231	0.592407	170	16
breeding	CpG|PA_chr06:803708760-803708760	CpG	PA_chr06	803708760	803708760	PA_chr06:803708760-803708760	1.29207e-15	5.52361e-14	107.579	0.60648	168	17
breeding	CpG|PA_chr07:108815640-108815640	CpG	PA_chr07	108815640	108815640	PA_chr07:108815640-108815640	2.05228e-15	7.97592e-14	106.517	0.591615	170	17
breeding	CpG|PA_chr09:742653390-742653390	CpG	PA_chr09	742653390	742653390	PA_chr09:742653390-742653390	2.00927e-15	7.97592e-14	106.566	0.559048	179	17
breeding	CpG|PA_chr11:41917242-41917242	CpG	PA_chr11	41917242	41917242	PA_chr11:41917242-41917242	2.21311e-15	8.227e-14	106.344	0.598304	168	17
breeding	CpG|PA_chr03:345787412-345787412	CpG	PA_chr03	345787412	345787412	PA_chr03:345787412-345787412	2.79702e-15	9.9644e-14	101.196	0.562552	170	15
breeding	CpG|PA_chr04:649628746-649628746	CpG	PA_chr04	649628746	649628746	PA_chr04:649628746-649628746	3.94428e-15	1.34894e-13	102.736	0.566038	171	16
breeding	CpG|PA_chr07:494065482-494065482	CpG	PA_chr07	494065482	494065482	PA_chr07:494065482-494065482	4.38161e-15	1.39124e-13	104.774	0.572736	172	17
breeding	CpG|PA_chr04:185344460-185344460	CpG	PA_chr04	185344460	185344460	PA_chr04:185344460-185344460	4.39339e-15	1.39124e-13	102.49	0.560832	172	16
breeding	CpG|PA_chr10:381928401-381928401	CpG	PA_chr10	381928401	381928401	PA_chr10:381928401-381928401	5.62357e-15	1.7172e-13	104.2	0.576468	170	17
breeding	CpG|PA_chr07:1054371903-1054371903	CpG	PA_chr07	1054371903	1054371903	PA_chr07:1054371903-1054371903	9.81967e-15	2.89511e-13	102.915	0.56074	172	17
breeding	CpG|PA_chr05:270982886-270982886	CpG	PA_chr05	270982886	270982886	PA_chr05:270982886-270982886	1.38498e-14	3.9472e-13	102.121	0.559226	171	17
breeding	CpG|PA_chr09:265665866-265665866	CpG	PA_chr09	265665866	265665866	PA_chr09:265665866-265665866	1.51218e-14	4.17069e-13	99.6618	0.549752	170	16
breeding	CpG|PA_chr12:894867031-894867031	CpG	PA_chr12	894867031	894867031	PA_chr12:894867031-894867031	1.63695e-14	4.37373e-13	101.735	0.560357	170	17
breeding	CpG|PA_chr07_cUL0049:8085249-8085249	CpG	PA_chr07_cUL0049	8085249	8085249	PA_chr07_cUL0049:8085249-8085249	1.88313e-14	4.87901e-13	99.1587	0.550057	169	16
breeding	CpG|PA_chr09:849487882-849487882	CpG	PA_chr09	849487882	849487882	PA_chr09:849487882-849487882	2.24559e-14	5.647e-13	98.7547	0.520216	177	16
breeding	CpG|PA_chr07:37177261-37177261	CpG	PA_chr07	37177261	37177261	PA_chr07:37177261-37177261	2.50639e-14	6.12274e-13	100.749	0.553918	170	17
breeding	CpG|PA_chr08:626004739-626004739	CpG	PA_chr08	626004739	626004739	PA_chr08:626004739-626004739	3.01565e-14	6.97478e-13	98.0776	0.546563	168	16
breeding	CpG|PA_chr09:1067742060-1067742060	CpG	PA_chr09	1067742060	1067742060	PA_chr09:1067742060-1067742060	3.01833e-14	6.97478e-13	100.319	0.520488	179	17
breeding	CpG|PA_chr07:1165907624-1165907624	CpG	PA_chr07	1165907624	1165907624	PA_chr07:1165907624-1165907624	3.6764e-14	8.27191e-13	99.8621	0.534153	174	17
breeding	CpG|PA_chr03:740162239-740162239	CpG	PA_chr03	740162239	740162239	PA_chr03:740162239-740162239	4.0028e-14	8.55598e-13	97.4266	0.538736	169	16
breeding	CpG|PA_chr12:724330593-724330593	CpG	PA_chr12	724330593	724330593	PA_chr12:724330593-724330593	3.91364e-14	8.55598e-13	97.4784	0.532118	171	16
breeding	CpG|PA_chr03:1029614328-1029614328	CpG	PA_chr03	1029614328	1029614328	PA_chr03:1029614328-1029614328	4.4216e-14	9.22065e-13	99.4342	0.538285	172	17
breeding	CpG|PA_chr01:477181969-477181969	CpG	PA_chr01	477181969	477181969	PA_chr01:477181969-477181969	5.25076e-14	1.0689e-12	99.0354	0.542715	170	17
breeding	CpG|PA_chr06:790092354-790092354	CpG	PA_chr06	790092354	790092354	PA_chr06:790092354-790092354	5.45879e-14	1.08541e-12	98.9452	0.512008	179	17
breeding	CpG|PA_chr02_cUL0065:5305795-5305795	CpG	PA_chr02_cUL0065	5305795	5305795	PA_chr02_cUL0065:5305795-5305795	6.54505e-14	1.24356e-12	98.5239	0.528999	173	17
breeding	CpG|PA_chr04:1346374-1346374	CpG	PA_chr04	1346374	1346374	PA_chr04:1346374-1346374	6.5075e-14	1.24356e-12	96.3079	0.527973	170	16
breeding	CpG|PA_chr04:1307746752-1307746752	CpG	PA_chr04	1307746752	1307746752	PA_chr04:1307746752-1307746752	6.89322e-14	1.25398e-12	98.4035	0.545718	168	17
breeding	CpG|PA_chr03:1157375116-1157375116	CpG	PA_chr03	1157375116	1157375116	PA_chr03:1157375116-1157375116	6.81753e-14	1.25398e-12	98.4291	0.542297	169	17
breeding	CpG|PA_chr04:542383441-542383441	CpG	PA_chr04	542383441	542383441	PA_chr04:542383441-542383441	7.30675e-14	1.30152e-12	96.041	0.52624	170	16
breeding	CpG|PA_chr06:556801244-556801244	CpG	PA_chr06	556801244	556801244	PA_chr06:556801244-556801244	8.29281e-14	1.44701e-12	97.9739	0.532298	171	17
breeding	CpG|PA_chr05:331961738-331961738	CpG	PA_chr05	331961738	331961738	PA_chr05:331961738-331961738	8.95016e-14	1.53048e-12	97.7965	0.538135	169	17
natural	CHH|PA_chr07:941785662-941785662	CHH	PA_chr07	941785662	941785662	PA_chr07:941785662-941785662	8.15145e-07	0.00250372	71.1218	0.265867	205	24
natural	CHH|PA_chr04:884287384-884287384	CHH	PA_chr04	884287384	884287384	PA_chr04:884287384-884287384	5.69606e-07	0.00250372	73.8156	0.22541	246	25
natural	CHH|PA_chr04:884287393-884287393	CHH	PA_chr04	884287393	884287393	PA_chr04:884287393-884287393	8.03118e-06	0.0164452	62.9728	0.200847	227	23
natural	CpG|PA_chr12:753680076-753680076	CpG	PA_chr12	753680076	753680076	PA_chr12:753680076-753680076	0.000115934	0.044279	58.1517	0.116559	318	25
natural	CpG|PA_chr05:1349138772-1349138772	CpG	PA_chr05	1349138772	1349138772	PA_chr05:1349138772-1349138772	0.000160238	0.044279	57.1352	0.112323	320	25
natural	CpG|PA_chr07:944724120-944724120	CpG	PA_chr07	944724120	944724120	PA_chr07:944724120-944724120	0.000153822	0.044279	57.2641	0.112	322	25

## Sheet: Supp Table S4
Table S4. Genomic-epigenomic distance statistics
cohort	context	n_samples	ecs_snps_qc	tbs_sites_used	mantel_r	mantel_p	procrustes_t0	procrustes_p	rv	rv_p	mantel_p_adj	procrustes_p_adj	rv_p_adj
BREEDING	CHG	209	450947	3871	0.229436	0.0001	0.595364	0.0001	0.470939	0.0001	0.0002	0.0002	0.0002
BREEDING	CHH	209	450947	8496	0.207605	0.0001	0.614223	0.0001	0.381154	0.0001	0.0002	0.0002	0.0002
BREEDING	CpG	209	450947	855	0.37524	0.0001	0.748272	0.0001	0.573117	0.0001	0.0002	0.0002	0.0002
NATURAL	CHG	393	462617	2841	0.0468758	0.1565	0.0596269	0.4325	0.00392366	0.5482	0.1878	0.4325	0.5482
NATURAL	CHH	393	462617	6143	0.0587468	0.1055	0.118819	0.0079	0.0164412	0.012	0.15825	0.01185	0.018
NATURAL	CpG	393	462617	829	0.0224964	0.3079	0.0618875	0.3975	0.00548691	0.3673	0.3079	0.4325	0.44076
*Significant at p < 0.05. Permutations = 9,999.

## Sheet: Supp Table S5
Table S5. Robust meQTL pairs
cohort	snp	chr	snp_pos	site	site_pos	context	FDR_GENESIS5	FDR_MATRIXEQTL5
breeding	24754	PA_chr01	4033690	PA_chr01:794371788-794371788	794371788	CHG	1.03475e-23	5.15582e-34
breeding	25245	PA_chr01	4033690	PA_chr01:808948726-808948726	808948726	CHG	9.58539e-12	2.96971e-12
breeding	8650	PA_chr01	4033700	PA_chr01:257697079-257697079	257697079	CHG	4.74428e-13	1.77248e-15
breeding	8650	PA_chr01	4033700	PA_chr01:257697126-257697126	257697126	CHG	4.49344e-14	5.04532e-18
breeding	46381	PA_chr01	4033712	PA_chr01:1616458112-1616458112	1616458112	CHG	1.16785e-13	1.33312e-13
breeding	19755	PA_chr01	4033716	PA_chr01:647286595-647286595	647286595	CHG	2.24184e-11	1.68378e-25
breeding	24783	PA_chr01	4033716	PA_chr01:794654923-794654923	794654923	CHG	9.20955e-14	1.12411e-12
breeding	24783	PA_chr01	4033716	PA_chr01:794654938-794654938	794654938	CHG	4.44482e-12	1.02884e-12
breeding	26377	PA_chr01	4033716	PA_chr01:849587385-849587385	849587385	CHG	1.27342e-27	6.13847e-53
breeding	26377	PA_chr01	4033716	PA_chr01:849658910-849658910	849658910	CHG	1.68063e-27	1.18308e-52
breeding	26377	PA_chr01	4033716	PA_chr01:849658933-849658933	849658933	CHG	3.18567e-14	3.63589e-20
breeding	46916	PA_chr01	4033716	PA_chr01:1636994073-1636994073	1636994073	CHG	4.5579e-12	1.28311e-48
breeding	46916	PA_chr01	4033716	PA_chr01:1636994087-1636994087	1636994087	CHG	2.65096e-11	1.50409e-51
breeding	46916	PA_chr01	4033716	PA_chr01:1636994096-1636994096	1636994096	CHG	3.11604e-11	2.72718e-46
breeding	14607	PA_chr01	4033736	PA_chr01:478057862-478057862	478057862	CHG	1.90523e-12	3.51201e-19
breeding	26378	PA_chr01	4033736	PA_chr01:849587385-849587385	849587385	CHG	4.54124e-26	7.7057e-45
breeding	26378	PA_chr01	4033736	PA_chr01:849658910-849658910	849658910	CHG	1.18028e-27	1.36758e-50
breeding	26378	PA_chr01	4033736	PA_chr01:849658933-849658933	849658933	CHG	4.29652e-14	7.32215e-19
breeding	22074	PA_chr01	4033752	PA_chr01:732865283-732865283	732865283	CHG	2.32795e-35	3.56557e-125
breeding	22074	PA_chr01	4033752	PA_chr01:732865289-732865289	732865289	CHG	1.71003e-31	4.84281e-79
breeding	22074	PA_chr01	4033752	PA_chr01:732865295-732865295	732865295	CHG	7.96301e-30	2.71007e-65
breeding	22074	PA_chr01	4033752	PA_chr01:732865331-732865331	732865331	CHG	9.1009e-27	4.59754e-54
breeding	22074	PA_chr01	4033752	PA_chr01:732865352-732865352	732865352	CHG	1.4616e-35	3.49168e-109
breeding	22074	PA_chr01	4033752	PA_chr01:732865378-732865378	732865378	CHG	4.63008e-30	1.79959e-67
breeding	22074	PA_chr01	4033752	PA_chr01:732865458-732865458	732865458	CHG	3.76613e-35	1.08185e-101
breeding	22074	PA_chr01	4033752	PA_chr01:732865481-732865481	732865481	CHG	2.71183e-16	1.46985e-27
breeding	22074	PA_chr01	4033752	PA_chr01:732865487-732865487	732865487	CHG	5.76106e-19	6.80701e-31
breeding	22074	PA_chr01	4033752	PA_chr01:732865503-732865503	732865503	CHG	8.94103e-26	2.14386e-50
breeding	22074	PA_chr01	4033752	PA_chr01:732865616-732865616	732865616	CHG	7.83637e-37	1.57259e-138
breeding	22074	PA_chr01	4033752	PA_chr01:732865619-732865619	732865619	CHG	3.61774e-32	4.77681e-80
breeding	24788	PA_chr01	4033763	PA_chr01:794654923-794654923	794654923	CHG	9.20955e-14	8.99848e-13
breeding	24788	PA_chr01	4033763	PA_chr01:794654938-794654938	794654938	CHG	4.44482e-12	9.25012e-13
breeding	44092	PA_chr01	4033763	PA_chr01:1524094670-1524094670	1524094670	CHG	5.41532e-11	5.43685e-16
breeding	40474	PA_chr01	4033765	PA_chr01:1378542351-1378542351	1378542351	CHG	7.8837e-11	1.28997e-12
breeding	41674	PA_chr01	4033765	PA_chr01:1434369841-1434369841	1434369841	CHG	2.13986e-16	2.73255e-21
breeding	24790	PA_chr01	4033774	PA_chr01:794654938-794654938	794654938	CHG	3.86765e-11	3.05103e-11
breeding	46744	PA_chr01	4033774	PA_chr01:1634041172-1634041172	1634041172	CHG	2.1578e-16	2.29027e-12
breeding	13899	PA_chr01	4033779	PA_chr01:451056668-451056668	451056668	CHG	7.99139e-13	1.00455e-25
breeding	39912	PA_chr01	4033779	PA_chr01:1352064192-1352064192	1352064192	CHG	2.11736e-19	8.57472e-28
breeding	41676	PA_chr01	4033779	PA_chr01:1434369890-1434369890	1434369890	CHG	4.51822e-31	8.06827e-71
breeding	46745	PA_chr01	4033779	PA_chr01:1634041172-1634041172	1634041172	CHG	2.1578e-16	2.29027e-12
breeding	23689	PA_chr01	4033800	PA_chr01:768237282-768237282	768237282	CHG	2.94377e-11	8.80251e-14
breeding	41677	PA_chr01	4033800	PA_chr01:1434369841-1434369841	1434369841	CHG	4.07066e-28	3.37741e-50
breeding	41677	PA_chr01	4033800	PA_chr01:1434369890-1434369890	1434369890	CHG	1.45402e-11	1.93007e-11
breeding	19825	PA_chr01	4033802	PA_chr01:648930562-648930562	648930562	CHG	7.53525e-18	9.39907e-26
breeding	23690	PA_chr01	4033802	PA_chr01:768237282-768237282	768237282	CHG	5.65876e-11	8.65186e-15
breeding	27774	PA_chr01	4033811	PA_chr01:886397451-886397451	886397451	CHG	5.23723e-17	7.98176e-23
breeding	41680	PA_chr01	4033811	PA_chr01:1434369890-1434369890	1434369890	CHG	4.51822e-31	8.06827e-71
breeding	39917	PA_chr01	4033812	PA_chr01:1352064192-1352064192	1352064192	CHG	1.70675e-17	6.99871e-21
breeding	10363	PA_chr01	4033817	PA_chr01:339227670-339227670	339227670	CHG	1.29122e-11	2.35143e-14
breeding	10363	PA_chr01	4033817	PA_chr01:339227745-339227745	339227745	CHG	9.99504e-12	7.50333e-14
breeding	27309	PA_chr01	4033818	PA_chr01:877705327-877705327	877705327	CHG	7.27036e-15	2.08447e-19
breeding	27309	PA_chr01	4033818	PA_chr01:877705494-877705494	877705494	CHG	2.5462e-11	1.15787e-16
breeding	27778	PA_chr01	4033818	PA_chr01:886397521-886397521	886397521	CHG	2.28537e-14	1.21291e-19
breeding	41684	PA_chr01	4033818	PA_chr01:1434369841-1434369841	1434369841	CHG	3.7367e-13	5.74681e-16
breeding	45957	PA_chr01	4033818	PA_chr01:1606939590-1606939590	1606939590	CHG	1.80425e-14	1.67038e-18
breeding	45957	PA_chr01	4033818	PA_chr01:1606939676-1606939676	1606939676	CHG	2.67774e-12	2.10426e-15
breeding	45957	PA_chr01	4033818	PA_chr01:1606939691-1606939691	1606939691	CHG	3.86387e-14	1.25529e-17
breeding	27310	PA_chr01	4033824	PA_chr01:877705330-877705330	877705330	CHG	2.77805e-14	3.63794e-25
breeding	27310	PA_chr01	4033824	PA_chr01:877705392-877705392	877705392	CHG	5.76881e-11	2.58765e-18
breeding	31331	PA_chr01	4033824	PA_chr01:1032604973-1032604973	1032604973	CHG	3.89181e-26	2.11571e-40
breeding	41685	PA_chr01	4033824	PA_chr01:1434369841-1434369841	1434369841	CHG	1.97506e-27	5.76279e-50
breeding	41685	PA_chr01	4033824	PA_chr01:1434369890-1434369890	1434369890	CHG	3.57608e-12	1.13002e-11
breeding	46646	PA_chr01	4033824	PA_chr01:1631361540-1631361540	1631361540	CHG	5.24204e-16	1.11981e-25
breeding	46646	PA_chr01	4033824	PA_chr01:1631361570-1631361570	1631361570	CHG	9.61314e-20	1.34719e-33
breeding	46646	PA_chr01	4033824	PA_chr01:1631361573-1631361573	1631361573	CHG	4.25662e-22	1.16721e-43
breeding	46646	PA_chr01	4033824	PA_chr01:1631361581-1631361581	1631361581	CHG	1.55797e-19	1.38501e-31
breeding	46646	PA_chr01	4033824	PA_chr01:1631361604-1631361604	1631361604	CHG	1.57652e-20	3.96758e-37
breeding	46646	PA_chr01	4033824	PA_chr01:1631361614-1631361614	1631361614	CHG	2.28446e-17	3.70519e-30
breeding	8669	PA_chr01	4033824	PA_chr01:257696861-257696861	257696861	CHG	9.83464e-11	1.9234e-11
breeding	8669	PA_chr01	4033824	PA_chr01:257696957-257696957	257696957	CHG	3.38144e-16	1.70504e-27
breeding	8669	PA_chr01	4033824	PA_chr01:257696980-257696980	257696980	CHG	1.41925e-19	3.00237e-34
breeding	8669	PA_chr01	4033824	PA_chr01:257697055-257697055	257697055	CHG	5.40796e-21	3.14478e-40
breeding	8669	PA_chr01	4033824	PA_chr01:257697068-257697068	257697068	CHG	3.59811e-19	4.45183e-34
breeding	8669	PA_chr01	4033824	PA_chr01:257697079-257697079	257697079	CHG	1.0117e-24	5.21645e-55
breeding	8669	PA_chr01	4033824	PA_chr01:257697091-257697091	257697091	CHG	2.58104e-13	6.49769e-20
breeding	8669	PA_chr01	4033824	PA_chr01:257697100-257697100	257697100	CHG	1.5188e-15	2.46156e-25
breeding	8669	PA_chr01	4033824	PA_chr01:257697126-257697126	257697126	CHG	3.64845e-26	2.82234e-59
breeding	21115	PA_chr01	4033826	PA_chr01:708988309-708988309	708988309	CHG	9.02358e-12	8.44957e-18
breeding	21115	PA_chr01	4033826	PA_chr01:708988466-708988466	708988466	CHG	8.82492e-21	1.28476e-41
breeding	27311	PA_chr01	4033826	PA_chr01:877705327-877705327	877705327	CHG	9.32609e-12	9.03689e-12
breeding	46647	PA_chr01	4033826	PA_chr01:1631361540-1631361540	1631361540	CHG	2.3918e-11	3.02825e-14
breeding	46647	PA_chr01	4033826	PA_chr01:1631361570-1631361570	1631361570	CHG	4.38894e-20	1.12365e-30
breeding	46647	PA_chr01	4033826	PA_chr01:1631361573-1631361573	1631361573	CHG	3.09854e-20	1.3425e-32
breeding	46647	PA_chr01	4033826	PA_chr01:1631361581-1631361581	1631361581	CHG	7.88962e-21	1.34727e-32
breeding	46647	PA_chr01	4033826	PA_chr01:1631361604-1631361604	1631361604	CHG	3.58625e-23	6.74527e-41
breeding	46647	PA_chr01	4033826	PA_chr01:1631361614-1631361614	1631361614	CHG	7.38221e-20	1.43106e-32
breeding	47257	PA_chr01	4033826	PA_chr01:1649666749-1649666749	1649666749	CHG	1.81607e-13	2.91118e-27
breeding	47257	PA_chr01	4033826	PA_chr01:1649666769-1649666769	1649666769	CHG	6.54377e-13	1.32252e-24
breeding	47257	PA_chr01	4033826	PA_chr01:1649666773-1649666773	1649666773	CHG	5.36171e-13	1.33822e-28
breeding	47257	PA_chr01	4033826	PA_chr01:1649666776-1649666776	1649666776	CHG	1.48856e-11	8.93686e-26
breeding	47257	PA_chr01	4033826	PA_chr01:1649666806-1649666806	1649666806	CHG	1.06638e-11	8.48543e-22
breeding	47257	PA_chr01	4033826	PA_chr01:1649666847-1649666847	1649666847	CHG	5.74288e-11	8.33575e-22
breeding	47257	PA_chr01	4033826	PA_chr01:1649666884-1649666884	1649666884	CHG	4.28881e-11	2.2104e-23
breeding	27313	PA_chr01	4033833	PA_chr01:877705450-877705450	877705450	CHG	1.79696e-11	2.02484e-16
breeding	40063	PA_chr01	4033833	PA_chr01:1358765669-1358765669	1358765669	CHG	3.76781e-28	8.81547e-65
breeding	41688	PA_chr01	4033833	PA_chr01:1434369841-1434369841	1434369841	CHG	6.14502e-26	2.02365e-45
breeding	43985	PA_chr01	4033833	PA_chr01:1522867550-1522867550	1522867550	CHG	2.97867e-11	1.58651e-16
breeding	43985	PA_chr01	4033833	PA_chr01:1522867556-1522867556	1522867556	CHG	1.77459e-11	8.74366e-20
breeding	43985	PA_chr01	4033833	PA_chr01:1522867579-1522867579	1522867579	CHG	6.46703e-12	3.20255e-19
breeding	44518	PA_chr01	4033833	PA_chr01:1536069748-1536069748	1536069748	CHG	8.28596e-15	4.08497e-25
breeding	44518	PA_chr01	4033833	PA_chr01:1536069792-1536069792	1536069792	CHG	8.89529e-14	3.69716e-30
breeding	19836	PA_chr01	4033848	PA_chr01:648930562-648930562	648930562	CHG	8.41791e-11	6.58971e-12
breeding	27314	PA_chr01	4033848	PA_chr01:877705327-877705327	877705327	CHG	5.57283e-17	3.72132e-26
breeding	806	PA_chr01	4033848	PA_chr01:13523911-13523911	13523911	CHG	4.13785e-11	2.33247e-13
breeding	21856	PA_chr01	4033856	PA_chr01:728581014-728581014	728581014	CHG	2.16369e-12	1.47074e-26
breeding	41690	PA_chr01	4033856	PA_chr01:1434369841-1434369841	1434369841	CHG	5.19106e-13	2.57647e-18
breeding	46651	PA_chr01	4033856	PA_chr01:1631361540-1631361540	1631361540	CHG	4.26607e-16	1.22618e-23
breeding	46651	PA_chr01	4033856	PA_chr01:1631361570-1631361570	1631361570	CHG	3.32724e-21	3.19695e-33
breeding	46651	PA_chr01	4033856	PA_chr01:1631361573-1631361573	1631361573	CHG	3.69947e-24	3.83894e-43
breeding	46651	PA_chr01	4033856	PA_chr01:1631361581-1631361581	1631361581	CHG	1.10006e-20	3.14772e-31
breeding	46651	PA_chr01	4033856	PA_chr01:1631361604-1631361604	1631361604	CHG	3.76493e-21	3.13166e-35
breeding	46651	PA_chr01	4033856	PA_chr01:1631361614-1631361614	1631361614	CHG	6.51305e-18	9.59567e-29
breeding	11973	PA_chr01	4033881	PA_chr01:379873615-379873615	379873615	CHG	3.55758e-16	9.19195e-27
breeding	23703	PA_chr01	4033881	PA_chr01:768237282-768237282	768237282	CHG	3.04605e-11	1.11769e-13
breeding	41691	PA_chr01	4033881	PA_chr01:1434369890-1434369890	1434369890	CHG	6.71908e-19	3.42941e-40
breeding	33255	PA_chr01	4033889	PA_chr01:1096665323-1096665323	1096665323	CHG	2.28235e-12	7.82999e-19
breeding	13916	PA_chr01	4033912	PA_chr01:451056668-451056668	451056668	CHG	3.41238e-11	5.17442e-16
breeding	23705	PA_chr01	4033912	PA_chr01:768237271-768237271	768237271	CHG	7.25432e-11	2.78404e-13
breeding	25615	PA_chr01	4033920	PA_chr01:822262080-822262080	822262080	CHG	2.03996e-11	2.89004e-11
breeding	27319	PA_chr01	4033920	PA_chr01:877705330-877705330	877705330	CHG	1.15612e-18	1.13965e-27
breeding	27319	PA_chr01	4033920	PA_chr01:877705392-877705392	877705392	CHG	4.0611e-14	1.1119e-20
breeding	43991	PA_chr01	4033920	PA_chr01:1522867556-1522867556	1522867556	CHG	7.20202e-13	2.47046e-21
breeding	43991	PA_chr01	4033920	PA_chr01:1522867579-1522867579	1522867579	CHG	2.48155e-13	3.25886e-21
breeding	46655	PA_chr01	4033920	PA_chr01:1631361604-1631361604	1631361604	CHG	1.81081e-11	7.81418e-16
breeding	47727	PA_chr01	4033920	PA_chr01:1662227028-1662227028	1662227028	CHG	3.01867e-36	5.87718e-24
breeding	43993	PA_chr01	4060585	PA_chr01:1522867556-1522867556	1522867556	CHG	4.13785e-11	2.67109e-18
breeding	43993	PA_chr01	4060585	PA_chr01:1522867579-1522867579	1522867579	CHG	1.89486e-11	9.08143e-18
breeding	44710	PA_chr01	4060585	PA_chr01:1548323190-1548323190	1548323190	CHG	1.33251e-11	4.01048e-19
breeding	44710	PA_chr01	4060585	PA_chr01:1548323300-1548323300	1548323300	CHG	6.60761e-12	1.11389e-19
breeding	46657	PA_chr01	4060585	PA_chr01:1631361540-1631361540	1631361540	CHG	1.89039e-13	1.01756e-17
breeding	46657	PA_chr01	4060585	PA_chr01:1631361570-1631361570	1631361570	CHG	3.96619e-16	1.29524e-22
breeding	46657	PA_chr01	4060585	PA_chr01:1631361573-1631361573	1631361573	CHG	2.04205e-19	7.85642e-31
breeding	46657	PA_chr01	4060585	PA_chr01:1631361581-1631361581	1631361581	CHG	1.97329e-17	1.7048e-24
breeding	46657	PA_chr01	4060585	PA_chr01:1631361604-1631361604	1631361604	CHG	7.84472e-18	5.53798e-28
breeding	46657	PA_chr01	4060585	PA_chr01:1631361614-1631361614	1631361614	CHG	2.38091e-15	1.6351e-23
breeding	10749	PA_chr01	4060593	PA_chr01:358504891-358504891	358504891	CHG	2.22026e-11	6.2076e-14
breeding	20942	PA_chr01	4060593	PA_chr01:704462952-704462952	704462952	CHG	7.01165e-12	8.30483e-29
breeding	36646	PA_chr01	4060593	PA_chr01:1214769837-1214769837	1214769837	CHG	2.03432e-12	5.14118e-14
breeding	14507	PA_chr01	4060605	PA_chr01:467703019-467703019	467703019	CHG	2.58583e-13	2.75816e-18
breeding	27323	PA_chr01	4060605	PA_chr01:877705330-877705330	877705330	CHG	3.55719e-15	6.92112e-25
breeding	27323	PA_chr01	4060605	PA_chr01:877705392-877705392	877705392	CHG	3.7704e-11	3.88774e-18
breeding	33262	PA_chr01	4060613	PA_chr01:1096665323-1096665323	1096665323	CHG	1.14937e-14	7.67569e-34
breeding	43996	PA_chr01	4060613	PA_chr01:1522867579-1522867579	1522867579	CHG	5.08299e-11	9.47953e-17
breeding	44713	PA_chr01	4060613	PA_chr01:1548323190-1548323190	1548323190	CHG	3.12057e-11	2.3461e-17
breeding	44713	PA_chr01	4060613	PA_chr01:1548323217-1548323217	1548323217	CHG	7.27214e-11	5.11612e-17
breeding	44713	PA_chr01	4060613	PA_chr01:1548323300-1548323300	1548323300	CHG	2.27404e-11	9.14077e-18
breeding	27325	PA_chr01	4060621	PA_chr01:877705450-877705450	877705450	CHG	5.63485e-11	1.37496e-18
breeding	22104	PA_chr01	4060710	PA_chr01:732865283-732865283	732865283	CHG	6.88824e-25	7.37139e-71
breeding	22104	PA_chr01	4060710	PA_chr01:732865289-732865289	732865289	CHG	5.6377e-22	4.01398e-53
breeding	22104	PA_chr01	4060710	PA_chr01:732865295-732865295	732865295	CHG	8.41483e-20	4.52085e-44
breeding	22104	PA_chr01	4060710	PA_chr01:732865331-732865331	732865331	CHG	6.61712e-18	1.40677e-39
breeding	22104	PA_chr01	4060710	PA_chr01:732865352-732865352	732865352	CHG	1.08591e-24	1.08731e-64
breeding	22104	PA_chr01	4060710	PA_chr01:732865378-732865378	732865378	CHG	4.50598e-23	1.88654e-54
breeding	22104	PA_chr01	4060710	PA_chr01:732865458-732865458	732865458	CHG	1.88318e-24	3.51136e-62
breeding	22104	PA_chr01	4060710	PA_chr01:732865487-732865487	732865487	CHG	6.51395e-13	2.07491e-24
breeding	22104	PA_chr01	4060710	PA_chr01:732865503-732865503	732865503	CHG	3.56713e-17	8.64579e-37
breeding	22104	PA_chr01	4060710	PA_chr01:732865616-732865616	732865616	CHG	2.13798e-25	6.24338e-71
breeding	22104	PA_chr01	4060710	PA_chr01:732865619-732865619	732865619	CHG	1.91539e-20	4.89813e-49
breeding	2290	PA_chr01	4060710	PA_chr01:55382583-55382583	55382583	CHG	6.0463e-21	7.69191e-33
breeding	27326	PA_chr01	4060710	PA_chr01:877705494-877705494	877705494	CHG	2.09869e-13	3.81524e-16
breeding	3234	PA_chr01	4060710	PA_chr01:100067023-100067023	100067023	CHG	2.32307e-14	1.00124e-17
breeding	46663	PA_chr01	4060745	PA_chr01:1631361540-1631361540	1631361540	CHG	2.54075e-14	1.6939e-19
breeding	46663	PA_chr01	4060745	PA_chr01:1631361570-1631361570	1631361570	CHG	4.62882e-16	1.78739e-23
breeding	46663	PA_chr01	4060745	PA_chr01:1631361573-1631361573	1631361573	CHG	5.70983e-20	3.19695e-33
breeding	46663	PA_chr01	4060745	PA_chr01:1631361581-1631361581	1631361581	CHG	5.50774e-18	5.0567e-26
breeding	46663	PA_chr01	4060745	PA_chr01:1631361604-1631361604	1631361604	CHG	5.22882e-18	2.57052e-29
breeding	46663	PA_chr01	4060745	PA_chr01:1631361614-1631361614	1631361614	CHG	7.04068e-16	6.41442e-25
breeding	6101	PA_chr01	4060746	PA_chr01:189797556-189797556	189797556	CHG	9.78085e-13	1.00462e-22
breeding	11060	PA_chr01	4060755	PA_chr01:365728646-365728646	365728646	CHG	6.1802e-17	3.02215e-24
breeding	41704	PA_chr01	4060755	PA_chr01:1434369890-1434369890	1434369890	CHG	3.86652e-15	2.9323e-36
breeding	6102	PA_chr01	4060755	PA_chr01:189797556-189797556	189797556	CHG	9.78085e-13	1.00462e-22
breeding	1039	PA_chr01	4060761	PA_chr01:13672608-13672608	13672608	CHG	6.36223e-15	5.24021e-20
breeding	46666	PA_chr01	4060761	PA_chr01:1631361540-1631361540	1631361540	CHG	3.55758e-16	3.68433e-23
breeding	46666	PA_chr01	4060761	PA_chr01:1631361570-1631361570	1631361570	CHG	1.04687e-21	2.74964e-34
breeding	46666	PA_chr01	4060761	PA_chr01:1631361573-1631361573	1631361573	CHG	2.56959e-21	3.5218e-37
breeding	46666	PA_chr01	4060761	PA_chr01:1631361581-1631361581	1631361581	CHG	3.03228e-19	1.21745e-28
breeding	46666	PA_chr01	4060761	PA_chr01:1631361604-1631361604	1631361604	CHG	8.02095e-20	8.51297e-33
breeding	46666	PA_chr01	4060761	PA_chr01:1631361614-1631361614	1631361614	CHG	6.12691e-17	4.80922e-27
breeding	46667	PA_chr01	4559705	PA_chr01:1631361573-1631361573	1631361573	CHG	4.74428e-13	2.29027e-12
breeding	46667	PA_chr01	4559705	PA_chr01:1631361604-1631361604	1631361604	CHG	1.85482e-11	7.83634e-11
breeding	594	PA_chr01	4559705	PA_chr01:8979773-8979773	8979773	CHG	7.09638e-12	2.04227e-22
breeding	594	PA_chr01	4559705	PA_chr01:8979777-8979777	8979777	CHG	1.62887e-11	2.24727e-22
breeding	823	PA_chr01	4559705	PA_chr01:13523833-13523833	13523833	CHG	3.88307e-11	1.97376e-12
breeding	46668	PA_chr01	4559784	PA_chr01:1631361570-1631361570	1631361570	CHG	1.79696e-11	1.74083e-17
breeding	46668	PA_chr01	4559784	PA_chr01:1631361573-1631361573	1631361573	CHG	1.02504e-16	5.32187e-27
breeding	46668	PA_chr01	4559784	PA_chr01:1631361581-1631361581	1631361581	CHG	1.61219e-14	1.06184e-21
breeding	46668	PA_chr01	4559784	PA_chr01:1631361604-1631361604	1631361604	CHG	1.40379e-17	8.70757e-31
breeding	46668	PA_chr01	4559784	PA_chr01:1631361614-1631361614	1631361614	CHG	2.55726e-15	1.08126e-24
breeding	6105	PA_chr01	4559784	PA_chr01:189797556-189797556	189797556	CHG	1.03593e-17	2.05934e-32
breeding	14517	PA_chr01	4559799	PA_chr01:467703019-467703019	467703019	CHG	2.58583e-13	8.8548e-15
breeding	22112	PA_chr01	6336601	PA_chr01:732865283-732865283	732865283	CHG	4.32855e-17	1.279e-51
breeding	22112	PA_chr01	6336601	PA_chr01:732865289-732865289	732865289	CHG	9.53176e-14	2.38168e-36
breeding	22112	PA_chr01	6336601	PA_chr01:732865295-732865295	732865295	CHG	2.3853e-12	5.09892e-30
breeding	22112	PA_chr01	6336601	PA_chr01:732865331-732865331	732865331	CHG	5.17024e-11	3.56848e-28
breeding	22112	PA_chr01	6336601	PA_chr01:732865352-732865352	732865352	CHG	1.01777e-15	1.22428e-40
breeding	22112	PA_chr01	6336601	PA_chr01:732865378-732865378	732865378	CHG	3.14693e-16	1.2826e-39
breeding	22112	PA_chr01	6336601	PA_chr01:732865458-732865458	732865458	CHG	1.99436e-15	4.05771e-41
breeding	22112	PA_chr01	6336601	PA_chr01:732865616-732865616	732865616	CHG	5.91791e-17	2.12184e-44
breeding	22112	PA_chr01	6336601	PA_chr01:732865619-732865619	732865619	CHG	1.66727e-14	1.31769e-34
breeding	46670	PA_chr01	6336601	PA_chr01:1631361540-1631361540	1631361540	CHG	4.76649e-18	2.06386e-26
breeding	46670	PA_chr01	6336601	PA_chr01:1631361570-1631361570	1631361570	CHG	2.61292e-21	3.58844e-34
breeding	46670	PA_chr01	6336601	PA_chr01:1631361573-1631361573	1631361573	CHG	2.9886e-24	1.55736e-44
breeding	46670	PA_chr01	6336601	PA_chr01:1631361581-1631361581	1631361581	CHG	4.52136e-21	3.29882e-32
breeding	46670	PA_chr01	6336601	PA_chr01:1631361604-1631361604	1631361604	CHG	4.02823e-22	7.53554e-38
breeding	46670	PA_chr01	6336601	PA_chr01:1631361614-1631361614	1631361614	CHG	5.46854e-19	6.95425e-31
breeding	6108	PA_chr01	6336611	PA_chr01:189797556-189797556	189797556	CHG	6.63986e-13	4.75606e-28
breeding	46672	PA_chr01	6336619	PA_chr01:1631361540-1631361540	1631361540	CHG	8.18103e-20	3.07147e-29
breeding	46672	PA_chr01	6336619	PA_chr01:1631361570-1631361570	1631361570	CHG	1.06281e-21	1.17495e-34
breeding	46672	PA_chr01	6336619	PA_chr01:1631361573-1631361573	1631361573	CHG	8.89934e-25	5.21736e-46
breeding	46672	PA_chr01	6336619	PA_chr01:1631361581-1631361581	1631361581	CHG	3.11839e-21	1.74557e-32
breeding	46672	PA_chr01	6336619	PA_chr01:1631361604-1631361604	1631361604	CHG	1.046e-21	7.35262e-37
breeding	46672	PA_chr01	6336619	PA_chr01:1631361614-1631361614	1631361614	CHG	4.13917e-19	4.15365e-31
breeding	46673	PA_chr01	7212430	PA_chr01:1631361540-1631361540	1631361540	CHG	2.01899e-11	2.20175e-14
breeding	46673	PA_chr01	7212430	PA_chr01:1631361570-1631361570	1631361570	CHG	4.38894e-20	6.38606e-30
breeding	46673	PA_chr01	7212430	PA_chr01:1631361573-1631361573	1631361573	CHG	3.09854e-20	1.53265e-31
breeding	46673	PA_chr01	7212430	PA_chr01:1631361581-1631361581	1631361581	CHG	7.88962e-21	1.42111e-31
breeding	46673	PA_chr01	7212430	PA_chr01:1631361604-1631361604	1631361604	CHG	3.58625e-23	9.60445e-40
breeding	46673	PA_chr01	7212430	PA_chr01:1631361614-1631361614	1631361614	CHG	7.38221e-20	1.23767e-31
breeding	20478	PA_chr01	7212432	PA_chr01:665195206-665195206	665195206	CHG	2.53237e-14	5.57446e-28
breeding	20478	PA_chr01	7212432	PA_chr01:665195232-665195232	665195232	CHG	8.94125e-17	3.49067e-35
breeding	20478	PA_chr01	7212432	PA_chr01:665195239-665195239	665195239	CHG	1.14945e-17	5.74778e-37
breeding	20478	PA_chr01	7212432	PA_chr01:665195247-665195247	665195247	CHG	2.08914e-13	3.48547e-28
breeding	20478	PA_chr01	7212432	PA_chr01:665195284-665195284	665195284	CHG	1.05961e-17	1.80099e-34
breeding	20478	PA_chr01	7212432	PA_chr01:665195296-665195296	665195296	CHG	2.69921e-17	3.55805e-34
breeding	20478	PA_chr01	7212432	PA_chr01:665195309-665195309	665195309	CHG	4.79751e-15	4.26597e-27
breeding	1051	PA_chr01	7212472	PA_chr01:13672608-13672608	13672608	CHG	5.84943e-12	4.69741e-14
breeding	11077	PA_chr01	7741447	PA_chr01:365767841-365767841	365767841	CHG	2.5521e-24	4.48807e-19
breeding	1058	PA_chr01	7741454	PA_chr01:13672608-13672608	13672608	CHG	3.6213e-11	6.17789e-15
breeding	44554	PA_chr01	7741454	PA_chr01:1536115610-1536115610	1536115610	CHG	9.18763e-11	2.65313e-12
breeding	24618	PA_chr01	7741462	PA_chr01:789908142-789908142	789908142	CHG	5.52216e-21	5.13781e-14
breeding	47300	PA_chr01	7741482	PA_chr01:1649666769-1649666769	1649666769	CHG	6.94387e-12	5.88915e-23
breeding	47300	PA_chr01	7741482	PA_chr01:1649666773-1649666773	1649666773	CHG	1.31334e-11	1.17837e-25
breeding	47300	PA_chr01	7741482	PA_chr01:1649666776-1649666776	1649666776	CHG	8.72994e-12	4.95623e-24
breeding	47300	PA_chr01	7741482	PA_chr01:1649666884-1649666884	1649666884	CHG	1.83136e-11	3.35847e-19
breeding	35469	PA_chr01	7741500	PA_chr01:1168603244-1168603244	1168603244	CHG	2.2279e-20	4.42328e-35
breeding	8718	PA_chr01	7741506	PA_chr01:257739673-257739673	257739673	CHG	8.231e-11	6.23295e-16
breeding	27360	PA_chr01	7741509	PA_chr01:877705327-877705327	877705327	CHG	3.31471e-17	1.53544e-23
breeding	27361	PA_chr01	7741511	PA_chr01:877705450-877705450	877705450	CHG	2.14644e-15	1.00845e-16
breeding	27362	PA_chr01	7741518	PA_chr01:877705450-877705450	877705450	CHG	2.14644e-15	1.00845e-16
breeding	24631	PA_chr01	7741546	PA_chr01:789963037-789963037	789963037	CHG	6.98073e-15	2.0988e-19
breeding	24631	PA_chr01	7741546	PA_chr01:789963093-789963093	789963093	CHG	9.53879e-18	3.30535e-24
breeding	24631	PA_chr01	7741546	PA_chr01:789963109-789963109	789963109	CHG	4.39404e-17	1.80134e-23
breeding	24631	PA_chr01	7741546	PA_chr01:789963133-789963133	789963133	CHG	5.09112e-16	4.37749e-21
breeding	24631	PA_chr01	7741546	PA_chr01:789963144-789963144	789963144	CHG	2.68357e-15	3.40063e-19
breeding	24631	PA_chr01	7741546	PA_chr01:789963164-789963164	789963164	CHG	2.22734e-18	1.71615e-25
breeding	24631	PA_chr01	7741546	PA_chr01:789963170-789963170	789963170	CHG	2.72145e-17	1.49469e-23
breeding	24631	PA_chr01	7741546	PA_chr01:789963181-789963181	789963181	CHG	3.65275e-13	2.22087e-16
breeding	24631	PA_chr01	7741546	PA_chr01:789963206-789963206	789963206	CHG	8.25202e-18	1.1633e-24
breeding	24631	PA_chr01	7741546	PA_chr01:789963248-789963248	789963248	CHG	1.70866e-15	2.13612e-20
breeding	24631	PA_chr01	7741546	PA_chr01:789963283-789963283	789963283	CHG	4.27987e-14	2.23387e-18
breeding	24631	PA_chr01	7741546	PA_chr01:789963313-789963313	789963313	CHG	1.16758e-14	3.90126e-19
breeding	24631	PA_chr01	7741546	PA_chr01:789963318-789963318	789963318	CHG	1.40797e-12	1.84613e-15
breeding	24631	PA_chr01	7741546	PA_chr01:789963607-789963607	789963607	CHG	6.61554e-12	7.32757e-15
breeding	24631	PA_chr01	7741546	PA_chr01:789963725-789963725	789963725	CHG	9.53223e-12	2.29429e-15
breeding	24631	PA_chr01	7741546	PA_chr01:789963747-789963747	789963747	CHG	4.29356e-11	2.33903e-14
breeding	27364	PA_chr01	7741546	PA_chr01:877705327-877705327	877705327	CHG	1.69493e-13	1.24013e-18
breeding	27364	PA_chr01	7741546	PA_chr01:877705494-877705494	877705494	CHG	1.09601e-17	1.41922e-19
breeding	27365	PA_chr01	7741552	PA_chr01:877705450-877705450	877705450	CHG	3.03585e-13	3.9528e-11
breeding	27370	PA_chr01	7741579	PA_chr01:877705494-877705494	877705494	CHG	3.49288e-16	1.20379e-13
breeding	11122	PA_chr01	7741694	PA_chr01:365728646-365728646	365728646	CHG	6.1802e-17	3.02215e-24
breeding	921	PA_chr01	7742054	PA_chr01:13523911-13523911	13523911	CHG	1.18534e-11	3.4438e-14
breeding	936	PA_chr01	7742653	PA_chr01:13523833-13523833	13523833	CHG	3.61863e-11	3.68698e-14
breeding	48458	PA_chr01_cUL0044	1220024	PA_chr01_cUL0044:3729366-3729366	3729366	CHG	2.33399e-35	1.12738e-20
breeding	49391	PA_chr01_sUL004	293324	PA_chr01_sUL004:3366294-3366294	3366294	CHG	3.97036e-15	2.32846e-22
breeding	49399	PA_chr01_sUL004	351184	PA_chr01_sUL004:3366294-3366294	3366294	CHG	2.1406e-13	1.3098e-22
breeding	49401	PA_chr01_sUL004	454401	PA_chr01_sUL004:3366294-3366294	3366294	CHG	5.87059e-11	1.32027e-17
breeding	49431	PA_chr01_sUL004	3220025	PA_chr01_sUL004:3366294-3366294	3366294	CHG	3.52715e-16	1.1134e-24
breeding	49435	PA_chr01_sUL004	3233745	PA_chr01_sUL004:3366294-3366294	3366294	CHG	3.55758e-16	1.0396e-24
breeding	49436	PA_chr01_sUL004	3233767	PA_chr01_sUL004:3366294-3366294	3366294	CHG	1.41796e-17	4.01208e-25
breeding	49440	PA_chr01_sUL004	3233886	PA_chr01_sUL004:3366294-3366294	3366294	CHG	1.78757e-17	4.29735e-29
breeding	50565	PA_chr02	314851	PA_chr02:24460201-24460201	24460201	CHG	5.81439e-11	1.23104e-22
breeding	61887	PA_chr02	314851	PA_chr02:387479574-387479574	387479574	CHG	4.45338e-17	9.35576e-13
breeding	50566	PA_chr02	314868	PA_chr02:24460201-24460201	24460201	CHG	7.45014e-14	1.93384e-20
breeding	54847	PA_chr02	314868	PA_chr02:156153420-156153420	156153420	CHG	2.3198e-20	8.51297e-33
breeding	69307	PA_chr02	314868	PA_chr02:644188976-644188976	644188976	CHG	3.76781e-28	2.07771e-51
breeding	54848	PA_chr02	314869	PA_chr02:156153420-156153420	156153420	CHG	7.54124e-21	7.53776e-36
breeding	72044	PA_chr02	314869	PA_chr02:735789276-735789276	735789276	CHG	8.02814e-13	2.24011e-14
breeding	73771	PA_chr02	314869	PA_chr02:802481953-802481953	802481953	CHG	7.75731e-11	1.24964e-13
breeding	73771	PA_chr02	314869	PA_chr02:802481993-802481993	802481993	CHG	5.34896e-11	5.68055e-14
breeding	73771	PA_chr02	314869	PA_chr02:802482023-802482023	802482023	CHG	4.51089e-14	4.47063e-18
breeding	73771	PA_chr02	314869	PA_chr02:802482041-802482041	802482041	CHG	3.11835e-14	1.39728e-17
breeding	51581	PA_chr02	314890	PA_chr02:57842368-57842368	57842368	CHG	6.80231e-12	7.65416e-25
breeding	73772	PA_chr02	314890	PA_chr02:802481993-802481993	802481993	CHG	1.77731e-11	6.96301e-14
breeding	73772	PA_chr02	314890	PA_chr02:802482023-802482023	802482023	CHG	8.73004e-14	1.09407e-16
breeding	73772	PA_chr02	314890	PA_chr02:802482041-802482041	802482041	CHG	1.70346e-13	3.92735e-16
breeding	51582	PA_chr02	316050	PA_chr02:57842368-57842368	57842368	CHG	3.30945e-13	7.96444e-15
breeding	72046	PA_chr02	316050	PA_chr02:735789276-735789276	735789276	CHG	1.43391e-15	6.78137e-18
breeding	64309	PA_chr02	316241	PA_chr02:468176523-468176523	468176523	CHG	8.14759e-18	3.61412e-26
breeding	64309	PA_chr02	316241	PA_chr02:468176558-468176558	468176558	CHG	3.33218e-20	1.79016e-34
breeding	64309	PA_chr02	316241	PA_chr02:468176624-468176624	468176624	CHG	2.01944e-15	5.43923e-24
breeding	64309	PA_chr02	316241	PA_chr02:468176630-468176630	468176630	CHG	6.0971e-19	1.00053e-30
breeding	64309	PA_chr02	316241	PA_chr02:468176633-468176633	468176633	CHG	2.45639e-18	4.52642e-30
breeding	64309	PA_chr02	316241	PA_chr02:468176660-468176660	468176660	CHG	1.61353e-17	5.22693e-29
breeding	64310	PA_chr02	316346	PA_chr02:468176523-468176523	468176523	CHG	5.98227e-20	8.96968e-31
breeding	64310	PA_chr02	316346	PA_chr02:468176558-468176558	468176558	CHG	1.03994e-21	2.61963e-33
breeding	64310	PA_chr02	316346	PA_chr02:468176624-468176624	468176624	CHG	1.25435e-17	1.04484e-27
breeding	64310	PA_chr02	316346	PA_chr02:468176630-468176630	468176630	CHG	1.59512e-20	1.68066e-34
breeding	64310	PA_chr02	316346	PA_chr02:468176633-468176633	468176633	CHG	4.81623e-20	8.86458e-34
breeding	64310	PA_chr02	316346	PA_chr02:468176660-468176660	468176660	CHG	1.48341e-18	3.02842e-28
breeding	51585	PA_chr02	316423	PA_chr02:57842057-57842057	57842057	CHG	9.37894e-22	6.30933e-30
breeding	51585	PA_chr02	316423	PA_chr02:57842073-57842073	57842073	CHG	4.85911e-11	2.34452e-13
breeding	51585	PA_chr02	316423	PA_chr02:57842086-57842086	57842086	CHG	2.19003e-24	2.13359e-34
breeding	51585	PA_chr02	316423	PA_chr02:57842104-57842104	57842104	CHG	2.08947e-14	2.06313e-18
breeding	51585	PA_chr02	316423	PA_chr02:57842111-57842111	57842111	CHG	3.17251e-26	2.07952e-44
breeding	51585	PA_chr02	316423	PA_chr02:57842219-57842219	57842219	CHG	9.14285e-11	5.56987e-13
breeding	51585	PA_chr02	316423	PA_chr02:57842233-57842233	57842233	CHG	5.99283e-25	2.20161e-39
breeding	51585	PA_chr02	316423	PA_chr02:57842309-57842309	57842309	CHG	4.24067e-24	5.36973e-38
breeding	51585	PA_chr02	316423	PA_chr02:57842324-57842324	57842324	CHG	5.98412e-21	1.16884e-30
breeding	51585	PA_chr02	316423	PA_chr02:57842346-57842346	57842346	CHG	3.33577e-17	2.36524e-13
breeding	51585	PA_chr02	316423	PA_chr02:57842368-57842368	57842368	CHG	2.0532e-27	8.96468e-28
breeding	64312	PA_chr02	398906	PA_chr02:468176523-468176523	468176523	CHG	2.79671e-16	1.73589e-31
breeding	64312	PA_chr02	398906	PA_chr02:468176558-468176558	468176558	CHG	4.70061e-17	4.32347e-34
breeding	64312	PA_chr02	398906	PA_chr02:468176624-468176624	468176624	CHG	6.52365e-14	2.27652e-26
breeding	64312	PA_chr02	398906	PA_chr02:468176630-468176630	468176630	CHG	1.6787e-17	1.02089e-35
breeding	64312	PA_chr02	398906	PA_chr02:468176633-468176633	468176633	CHG	2.52438e-15	7.74694e-30
breeding	64312	PA_chr02	398906	PA_chr02:468176660-468176660	468176660	CHG	3.01192e-14	8.50094e-27
breeding	68366	PA_chr02	398906	PA_chr02:615566781-615566781	615566781	CHG	4.59018e-13	4.77937e-17
breeding	82127	PA_chr02	398906	PA_chr02:1052431367-1052431367	1052431367	CHG	3.97449e-13	2.2044e-18
breeding	51587	PA_chr02	399002	PA_chr02:57842057-57842057	57842057	CHG	8.23013e-15	2.92195e-18
breeding	51587	PA_chr02	399002	PA_chr02:57842086-57842086	57842086	CHG	1.15477e-14	4.37673e-17
breeding	51587	PA_chr02	399002	PA_chr02:57842111-57842111	57842111	CHG	1.94527e-15	3.87433e-20
breeding	51587	PA_chr02	399002	PA_chr02:57842233-57842233	57842233	CHG	1.42134e-13	9.00143e-17
breeding	73621	PA_chr02	399002	PA_chr02:799478149-799478149	799478149	CHG	2.41384e-12	9.47911e-20
breeding	66220	PA_chr02	399027	PA_chr02:550152617-550152617	550152617	CHG	8.77234e-15	6.16503e-30
breeding	51589	PA_chr02	399041	PA_chr02:57842057-57842057	57842057	CHG	8.23013e-15	2.92195e-18
breeding	51589	PA_chr02	399041	PA_chr02:57842086-57842086	57842086	CHG	1.15477e-14	4.37673e-17
breeding	51589	PA_chr02	399041	PA_chr02:57842111-57842111	57842111	CHG	1.94527e-15	3.87433e-20
breeding	51589	PA_chr02	399041	PA_chr02:57842233-57842233	57842233	CHG	1.42134e-13	9.00143e-17
breeding	64315	PA_chr02	399041	PA_chr02:468176558-468176558	468176558	CHG	4.00516e-13	1.95608e-20
breeding	64315	PA_chr02	399041	PA_chr02:468176630-468176630	468176630	CHG	8.51909e-12	9.03652e-20
breeding	64315	PA_chr02	399041	PA_chr02:468176633-468176633	468176633	CHG	3.49268e-11	3.6238e-18
breeding	64315	PA_chr02	399041	PA_chr02:468176660-468176660	468176660	CHG	1.71595e-11	3.96054e-20
breeding	68369	PA_chr02	399041	PA_chr02:615566876-615566876	615566876	CHG	4.47752e-24	5.25842e-35
breeding	73623	PA_chr02	399041	PA_chr02:799478149-799478149	799478149	CHG	2.26831e-13	1.58602e-22
breeding	61900	PA_chr02	399106	PA_chr02:387479685-387479685	387479685	CHG	2.86538e-13	2.41321e-36
breeding	66223	PA_chr02	399106	PA_chr02:550152617-550152617	550152617	CHG	6.16005e-19	7.75448e-35
breeding	73626	PA_chr02	399153	PA_chr02:799477899-799477899	799477899	CHG	2.6091e-11	1.49541e-19
breeding	54329	PA_chr02	399326	PA_chr02:143156202-143156202	143156202	CHG	5.10412e-12	9.272e-14
breeding	54579	PA_chr02	399326	PA_chr02:151681758-151681758	151681758	CHG	1.93969e-14	1.59563e-35
breeding	54579	PA_chr02	399326	PA_chr02:151681787-151681787	151681787	CHG	7.70655e-15	1.19076e-39
breeding	54579	PA_chr02	399326	PA_chr02:151681886-151681886	151681886	CHG	5.24567e-12	7.49003e-34
breeding	70447	PA_chr02	400756	PA_chr02:673885907-673885907	673885907	CHG	1.07132e-21	7.16942e-34
breeding	51920	PA_chr02	400787	PA_chr02:67824423-67824423	67824423	CHG	7.85878e-13	1.54049e-13
breeding	68376	PA_chr02	400787	PA_chr02:615566670-615566670	615566670	CHG	5.05849e-18	9.87868e-25
breeding	68376	PA_chr02	400787	PA_chr02:615566876-615566876	615566876	CHG	1.76416e-12	1.30108e-12
breeding	73630	PA_chr02	400787	PA_chr02:799478149-799478149	799478149	CHG	7.71599e-13	1.1639e-17
breeding	58340	PA_chr02	401001	PA_chr02:271209483-271209483	271209483	CHG	5.72032e-23	8.58293e-15
breeding	58340	PA_chr02	401001	PA_chr02:271209516-271209516	271209516	CHG	3.95624e-24	1.83176e-15
breeding	58340	PA_chr02	401001	PA_chr02:271209528-271209528	271209528	CHG	2.19331e-22	3.4368e-12
breeding	58340	PA_chr02	401001	PA_chr02:271209552-271209552	271209552	CHG	6.84029e-22	1.47883e-13
breeding	58340	PA_chr02	401001	PA_chr02:271209579-271209579	271209579	CHG	1.8923e-17	2.90359e-11
breeding	68378	PA_chr02	401001	PA_chr02:615566870-615566870	615566870	CHG	3.76493e-21	1.18478e-31
breeding	70450	PA_chr02	401001	PA_chr02:673885800-673885800	673885800	CHG	2.8498e-11	6.65993e-20
breeding	73632	PA_chr02	401001	PA_chr02:799478149-799478149	799478149	CHG	4.56322e-12	4.43624e-17
breeding	78252	PA_chr02	401001	PA_chr02:936145013-936145013	936145013	CHG	3.97688e-34	3.13537e-91
breeding	80697	PA_chr02	401001	PA_chr02:1007185095-1007185095	1007185095	CHG	1.54329e-11	8.20195e-13
breeding	80697	PA_chr02	401001	PA_chr02:1007185132-1007185132	1007185132	CHG	2.74267e-11	2.44827e-12
breeding	80697	PA_chr02	401001	PA_chr02:1007185137-1007185137	1007185137	CHG	7.36068e-12	2.62973e-13
breeding	80697	PA_chr02	401001	PA_chr02:1007185202-1007185202	1007185202	CHG	2.78581e-13	2.22979e-14
breeding	67296	PA_chr02	802718	PA_chr02:578528181-578528181	578528181	CHG	1.08818e-12	2.38973e-28
breeding	68379	PA_chr02	802718	PA_chr02:615566781-615566781	615566781	CHG	3.42395e-14	7.87579e-18
breeding	78253	PA_chr02	802718	PA_chr02:936145013-936145013	936145013	CHG	3.97688e-34	3.13537e-91
breeding	68380	PA_chr02	802755	PA_chr02:615566876-615566876	615566876	CHG	1.20449e-21	3.5052e-30
breeding	73634	PA_chr02	802755	PA_chr02:799477995-799477995	799477995	CHG	2.83193e-12	3.52452e-15
breeding	77368	PA_chr02	802755	PA_chr02:920823342-920823342	920823342	CHG	5.56953e-16	5.42664e-38
breeding	77368	PA_chr02	802755	PA_chr02:920823361-920823361	920823361	CHG	7.91486e-16	1.96253e-30
breeding	78254	PA_chr02	802755	PA_chr02:936145013-936145013	936145013	CHG	3.97688e-34	3.13537e-91
breeding	81985	PA_chr02	802872	PA_chr02:1043161426-1043161426	1043161426	CHG	7.02738e-11	2.06146e-19
breeding	51926	PA_chr02	802935	PA_chr02:67824423-67824423	67824423	CHG	1.67049e-11	1.48726e-11
breeding	64731	PA_chr02	802935	PA_chr02:505792206-505792206	505792206	CHG	8.63747e-12	4.80901e-15
breeding	64731	PA_chr02	802935	PA_chr02:505792226-505792226	505792226	CHG	5.08426e-13	6.43326e-17
breeding	68382	PA_chr02	802935	PA_chr02:615566781-615566781	615566781	CHG	1.14386e-15	4.31849e-20
breeding	54339	PA_chr02	802941	PA_chr02:143156202-143156202	143156202	CHG	2.90967e-14	2.21036e-15
breeding	68383	PA_chr02	802941	PA_chr02:615566781-615566781	615566781	CHG	8.19853e-19	5.76266e-26
breeding	68384	PA_chr02	802954	PA_chr02:615566781-615566781	615566781	CHG	2.67577e-15	1.52721e-19
breeding	73638	PA_chr02	802954	PA_chr02:799478149-799478149	799478149	CHG	7.07154e-13	3.29679e-17
breeding	76584	PA_chr02	802954	PA_chr02:897738580-897738580	897738580	CHG	1.24236e-14	7.39954e-47
breeding	68385	PA_chr02	802958	PA_chr02:615566781-615566781	615566781	CHG	1.14386e-15	4.31849e-20
breeding	73639	PA_chr02	802958	PA_chr02:799478028-799478028	799478028	CHG	1.42739e-11	8.57476e-16
breeding	51930	PA_chr02	802970	PA_chr02:67824423-67824423	67824423	CHG	1.00622e-13	9.8106e-14
breeding	63249	PA_chr02	802970	PA_chr02:429402386-429402386	429402386	CHG	8.95852e-16	3.11595e-21
breeding	67839	PA_chr02	802970	PA_chr02:603437584-603437584	603437584	CHG	3.04797e-16	6.61249e-26
breeding	68386	PA_chr02	802970	PA_chr02:615566876-615566876	615566876	CHG	4.14245e-21	1.77029e-28
breeding	54732	PA_chr02	802977	PA_chr02:153592871-153592871	153592871	CHG	2.94888e-13	3.44746e-36
breeding	63250	PA_chr02	802977	PA_chr02:429402386-429402386	429402386	CHG	8.95852e-16	3.11595e-21
breeding	62651	PA_chr02	804602	PA_chr02:403810566-403810566	403810566	CHG	8.4671e-12	2.40935e-15
breeding	63251	PA_chr02	804602	PA_chr02:429402386-429402386	429402386	CHG	1.10575e-14	7.59549e-19
breeding	68388	PA_chr02	804602	PA_chr02:615566670-615566670	615566670	CHG	5.06038e-12	1.28991e-14
breeding	51933	PA_chr02	804607	PA_chr02:67824399-67824399	67824399	CHG	2.12887e-15	1.71334e-20
breeding	73643	PA_chr02	804607	PA_chr02:799478149-799478149	799478149	CHG	1.39752e-14	4.19057e-28
breeding	81993	PA_chr02	804607	PA_chr02:1043160286-1043160286	1043160286	CHG	5.2513e-13	7.5247e-19
breeding	51934	PA_chr02	804688	PA_chr02:67824423-67824423	67824423	CHG	1.00622e-13	9.8106e-14
breeding	63253	PA_chr02	804688	PA_chr02:429402386-429402386	429402386	CHG	1.25507e-17	4.58157e-24
breeding	62874	PA_chr02	806420	PA_chr02:412609666-412609666	412609666	CHG	8.79965e-36	3.59703e-31
breeding	68391	PA_chr02	806420	PA_chr02:615566870-615566870	615566870	CHG	6.49222e-18	6.60677e-24
breeding	73645	PA_chr02	806420	PA_chr02:799478255-799478255	799478255	CHG	5.36171e-13	1.07532e-21
breeding	78265	PA_chr02	806420	PA_chr02:936145013-936145013	936145013	CHG	3.83853e-11	1.62656e-15
breeding	63255	PA_chr02	806440	PA_chr02:429402386-429402386	429402386	CHG	2.93417e-15	1.25418e-23
breeding	73646	PA_chr02	806440	PA_chr02:799478149-799478149	799478149	CHG	2.38937e-12	2.59202e-21
breeding	81996	PA_chr02	806440	PA_chr02:1043161426-1043161426	1043161426	CHG	1.91699e-11	1.10576e-19
breeding	63256	PA_chr02	806497	PA_chr02:429402386-429402386	429402386	CHG	1.13121e-14	4.16921e-19
breeding	68393	PA_chr02	806497	PA_chr02:615566876-615566876	615566876	CHG	9.17138e-25	6.26358e-39
breeding	77381	PA_chr02	806497	PA_chr02:920823342-920823342	920823342	CHG	2.23877e-18	3.21972e-36
breeding	77381	PA_chr02	806497	PA_chr02:920823361-920823361	920823361	CHG	3.1028e-17	1.85809e-30
breeding	63257	PA_chr02	1177473	PA_chr02:429402386-429402386	429402386	CHG	5.83218e-16	1.00462e-22
breeding	63258	PA_chr02	1177508	PA_chr02:429402386-429402386	429402386	CHG	6.86677e-14	1.09427e-17
breeding	63260	PA_chr02	1270395	PA_chr02:429402386-429402386	429402386	CHG	2.10481e-13	4.3182e-18
breeding	71290	PA_chr02	1270395	PA_chr02:710061542-710061542	710061542	CHG	1.16084e-11	8.12109e-13
breeding	63261	PA_chr02	1270403	PA_chr02:429402386-429402386	429402386	CHG	2.17779e-12	2.48829e-15
breeding	71291	PA_chr02	1270403	PA_chr02:710061524-710061524	710061524	CHG	5.05654e-12	2.98937e-17
breeding	63262	PA_chr02	1270473	PA_chr02:429402386-429402386	429402386	CHG	2.6744e-11	9.53599e-13
breeding	64693	PA_chr02	1270513	PA_chr02:505685476-505685476	505685476	CHG	1.68978e-11	8.69017e-17
breeding	54746	PA_chr02	1270565	PA_chr02:153592871-153592871	153592871	CHG	5.1463e-13	5.51755e-33
breeding	71298	PA_chr02	1270939	PA_chr02:710061524-710061524	710061524	CHG	2.45465e-17	2.83088e-23
breeding	71299	PA_chr02	1270963	PA_chr02:710061542-710061542	710061542	CHG	1.23041e-21	5.78246e-34
breeding	71300	PA_chr02	2791219	PA_chr02:710061542-710061542	710061542	CHG	3.33568e-16	2.10722e-19
breeding	71304	PA_chr02	3840807	PA_chr02:710061524-710061524	710061524	CHG	2.45465e-17	2.83088e-23
breeding	67716	PA_chr02	3840821	PA_chr02:595906227-595906227	595906227	CHG	2.24184e-11	3.27241e-15
breeding	67716	PA_chr02	3840821	PA_chr02:595906284-595906284	595906284	CHG	5.64443e-12	1.5669e-15
breeding	71305	PA_chr02	3840821	PA_chr02:710061542-710061542	710061542	CHG	1.23041e-21	5.78246e-34
breeding	71307	PA_chr02	3841036	PA_chr02:710061542-710061542	710061542	CHG	3.82044e-11	9.80241e-13
breeding	82556	PA_chr02	4643414	PA_chr02:1076755628-1076755628	1076755628	CHG	8.74325e-12	4.22e-21
breeding	82556	PA_chr02	4643414	PA_chr02:1076755634-1076755634	1076755634	CHG	1.24028e-11	3.2468e-21
breeding	82556	PA_chr02	4643414	PA_chr02:1076755682-1076755682	1076755682	CHG	1.65184e-12	2.04303e-22
breeding	82556	PA_chr02	4643414	PA_chr02:1076755802-1076755802	1076755802	CHG	1.61076e-11	4.08964e-23
breeding	82556	PA_chr02	4643414	PA_chr02:1076755821-1076755821	1076755821	CHG	6.69968e-13	1.06326e-22
breeding	82556	PA_chr02	4643414	PA_chr02:1076755828-1076755828	1076755828	CHG	1.15167e-11	2.52749e-22
breeding	82556	PA_chr02	4643414	PA_chr02:1076755849-1076755849	1076755849	CHG	4.36445e-11	1.17942e-21
breeding	82556	PA_chr02	4643414	PA_chr02:1076755934-1076755934	1076755934	CHG	1.54891e-12	1.36657e-23
breeding	64710	PA_chr02	4643651	PA_chr02:505685505-505685505	505685505	CHG	3.56398e-11	7.74621e-14
breeding	64711	PA_chr02	4643666	PA_chr02:505685476-505685476	505685476	CHG	2.69299e-16	3.23679e-20
breeding	63283	PA_chr02	4643715	PA_chr02:429402386-429402386	429402386	CHG	2.50832e-20	1.1664e-31
breeding	64712	PA_chr02	4643715	PA_chr02:505685505-505685505	505685505	CHG	3.56398e-11	9.715e-16
breeding	63295	PA_chr02	4872816	PA_chr02:429402386-429402386	429402386	CHG	1.55238e-17	1.8055e-25
breeding	89671	PA_chr02_sUL002	2043844	PA_chr02_sUL002:4381306-4381306	4381306	CHG	2.53586e-16	1.61882e-16
breeding	113458	PA_chr03	413785	PA_chr03:704227101-704227101	704227101	CHG	3.26351e-18	3.3057e-52
breeding	113458	PA_chr03	413785	PA_chr03:704227652-704227652	704227652	CHG	3.84706e-11	1.02102e-32
breeding	113458	PA_chr03	413785	PA_chr03:704227787-704227787	704227787	CHG	2.0257e-20	7.2792e-52
breeding	113458	PA_chr03	413785	PA_chr03:704227832-704227832	704227832	CHG	2.92323e-18	2.48545e-50
breeding	102116	PA_chr03	413831	PA_chr03:361491237-361491237	361491237	CHG	6.96618e-14	1.03851e-16
breeding	106845	PA_chr03	413831	PA_chr03:473734354-473734354	473734354	CHG	8.14712e-17	5.60086e-27
breeding	117073	PA_chr03	413831	PA_chr03:852102848-852102848	852102848	CHG	1.86967e-16	1.55487e-32
breeding	118690	PA_chr03	413831	PA_chr03:910146897-910146897	910146897	CHG	9.63738e-21	5.3184e-44
breeding	96575	PA_chr03	413831	PA_chr03:219310062-219310062	219310062	CHG	9.5253e-31	2.72175e-59
breeding	101597	PA_chr03	413856	PA_chr03:347127797-347127797	347127797	CHG	3.23938e-13	1.6248e-16
breeding	101597	PA_chr03	413856	PA_chr03:347127803-347127803	347127803	CHG	1.05198e-13	1.65096e-17
breeding	101597	PA_chr03	413856	PA_chr03:347127820-347127820	347127820	CHG	3.53e-13	1.39504e-16
breeding	101597	PA_chr03	413856	PA_chr03:347127844-347127844	347127844	CHG	9.77302e-13	4.38512e-16
breeding	101597	PA_chr03	413856	PA_chr03:347127849-347127849	347127849	CHG	3.31541e-13	9.92319e-17
breeding	102117	PA_chr03	413856	PA_chr03:361491237-361491237	361491237	CHG	5.95399e-14	4.6735e-17
breeding	123680	PA_chr03	413856	PA_chr03:1145217885-1145217885	1145217885	CHG	2.23982e-13	1.57865e-23
breeding	123680	PA_chr03	413856	PA_chr03:1145217901-1145217901	1145217901	CHG	5.28039e-16	8.02313e-29
breeding	123680	PA_chr03	413856	PA_chr03:1145217910-1145217910	1145217910	CHG	1.45369e-12	4.66109e-24
breeding	123680	PA_chr03	413856	PA_chr03:1145217928-1145217928	1145217928	CHG	6.63841e-12	2.90022e-19
breeding	123680	PA_chr03	413856	PA_chr03:1145217931-1145217931	1145217931	CHG	1.0485e-12	6.14749e-27
breeding	123680	PA_chr03	413856	PA_chr03:1145217940-1145217940	1145217940	CHG	1.83258e-11	1.93297e-24
breeding	127123	PA_chr03	413856	PA_chr03:1301333157-1301333157	1301333157	CHG	1.75566e-13	2.17209e-17
breeding	104816	PA_chr03	413903	PA_chr03:414016120-414016120	414016120	CHG	2.01099e-25	1.93856e-40
breeding	104816	PA_chr03	413903	PA_chr03:414016135-414016135	414016135	CHG	1.03336e-23	1.42711e-38
breeding	104816	PA_chr03	413903	PA_chr03:414016153-414016153	414016153	CHG	3.73228e-23	6.29881e-40
breeding	104816	PA_chr03	413903	PA_chr03:414016248-414016248	414016248	CHG	5.39162e-15	4.60996e-16
breeding	104816	PA_chr03	413903	PA_chr03:414016259-414016259	414016259	CHG	1.36718e-21	3.7514e-25
breeding	104816	PA_chr03	413903	PA_chr03:414016283-414016283	414016283	CHG	1.10913e-27	1.85472e-38
breeding	104816	PA_chr03	413903	PA_chr03:414016301-414016301	414016301	CHG	1.82908e-21	1.76281e-19
breeding	107762	PA_chr03	413903	PA_chr03:498294175-498294175	498294175	CHG	1.01185e-25	2.26821e-42
breeding	118692	PA_chr03	413903	PA_chr03:910146897-910146897	910146897	CHG	1.57636e-11	5.87863e-16
breeding	104817	PA_chr03	413912	PA_chr03:414016120-414016120	414016120	CHG	3.58605e-20	4.71291e-33
breeding	104817	PA_chr03	413912	PA_chr03:414016135-414016135	414016135	CHG	7.94022e-20	9.18526e-33
breeding	104817	PA_chr03	413912	PA_chr03:414016153-414016153	414016153	CHG	3.66379e-18	7.30753e-31
breeding	104817	PA_chr03	413912	PA_chr03:414016248-414016248	414016248	CHG	1.17949e-12	1.29652e-14
breeding	104817	PA_chr03	413912	PA_chr03:414016259-414016259	414016259	CHG	6.53269e-17	1.12015e-17
breeding	104817	PA_chr03	413912	PA_chr03:414016283-414016283	414016283	CHG	4.806e-22	1.25355e-28
breeding	104817	PA_chr03	413912	PA_chr03:414016301-414016301	414016301	CHG	3.71468e-19	1.90755e-16
breeding	114668	PA_chr03	413912	PA_chr03:736497133-736497133	736497133	CHG	5.70983e-20	1.04468e-64
breeding	114668	PA_chr03	413912	PA_chr03:736497183-736497183	736497183	CHG	1.25836e-19	1.48863e-47
breeding	114668	PA_chr03	413912	PA_chr03:736497955-736497955	736497955	CHG	4.41121e-12	1.30845e-29
breeding	114668	PA_chr03	413912	PA_chr03:736497964-736497964	736497964	CHG	1.45604e-14	6.07124e-36
breeding	114668	PA_chr03	413912	PA_chr03:736497979-736497979	736497979	CHG	2.77939e-15	1.7061e-41
breeding	114668	PA_chr03	413912	PA_chr03:736498177-736498177	736498177	CHG	1.76675e-16	3.90685e-41
breeding	118693	PA_chr03	413912	PA_chr03:910146897-910146897	910146897	CHG	1.74313e-22	1.43712e-36
breeding	125375	PA_chr03	413912	PA_chr03:1219413964-1219413964	1219413964	CHG	2.77151e-12	2.13872e-26
breeding	95316	PA_chr03	413912	PA_chr03:185769658-185769658	185769658	CHG	1.9584e-17	5.35347e-38
breeding	99020	PA_chr03	413912	PA_chr03:275184585-275184585	275184585	CHG	6.65172e-22	2.76358e-35
breeding	106385	PA_chr03	413915	PA_chr03:460871854-460871854	460871854	CHG	2.22109e-21	2.73062e-36
breeding	107764	PA_chr03	413915	PA_chr03:498294175-498294175	498294175	CHG	7.69776e-30	8.6011e-60
breeding	119584	PA_chr03	413915	PA_chr03:969547206-969547206	969547206	CHG	1.10953e-12	1.40617e-16
breeding	99021	PA_chr03	413915	PA_chr03:275184585-275184585	275184585	CHG	1.21926e-25	1.00589e-44
breeding	109956	PA_chr03	413921	PA_chr03:598407219-598407219	598407219	CHG	3.83775e-15	2.0567e-20
breeding	109956	PA_chr03	413921	PA_chr03:598407248-598407248	598407248	CHG	2.75562e-17	3.29014e-23
breeding	109956	PA_chr03	413921	PA_chr03:598407285-598407285	598407285	CHG	2.68265e-12	1.21565e-15
breeding	109956	PA_chr03	413921	PA_chr03:598407322-598407322	598407322	CHG	6.85955e-20	1.10076e-28
breeding	107766	PA_chr03	413934	PA_chr03:498294197-498294197	498294197	CHG	2.25265e-18	4.82819e-32
breeding	109957	PA_chr03	413934	PA_chr03:598407219-598407219	598407219	CHG	8.99372e-16	2.19169e-21
breeding	109957	PA_chr03	413934	PA_chr03:598407248-598407248	598407248	CHG	1.85391e-17	5.31757e-24
breeding	109957	PA_chr03	413934	PA_chr03:598407285-598407285	598407285	CHG	1.0575e-12	2.691e-16
breeding	109957	PA_chr03	413934	PA_chr03:598407322-598407322	598407322	CHG	1.75135e-20	6.15042e-30
breeding	119587	PA_chr03	413969	PA_chr03:969547206-969547206	969547206	CHG	4.77203e-21	7.09727e-29
breeding	101907	PA_chr03	413979	PA_chr03:356912482-356912482	356912482	CHG	5.34337e-21	1.58129e-25
breeding	102125	PA_chr03	413988	PA_chr03:361491237-361491237	361491237	CHG	7.7948e-15	2.44481e-19
breeding	104823	PA_chr03	413988	PA_chr03:414016120-414016120	414016120	CHG	8.44364e-17	3.14241e-15
breeding	104823	PA_chr03	413988	PA_chr03:414016135-414016135	414016135	CHG	5.73792e-18	6.17596e-16
breeding	104823	PA_chr03	413988	PA_chr03:414016153-414016153	414016153	CHG	3.77423e-16	4.8438e-14
breeding	104823	PA_chr03	413988	PA_chr03:414016248-414016248	414016248	CHG	8.12604e-12	6.8346e-13
breeding	104823	PA_chr03	413988	PA_chr03:414016259-414016259	414016259	CHG	1.53506e-14	3.95352e-13
breeding	104823	PA_chr03	413988	PA_chr03:414016283-414016283	414016283	CHG	3.648e-19	5.49242e-20
breeding	104823	PA_chr03	413988	PA_chr03:414016301-414016301	414016301	CHG	2.12279e-16	2.79962e-15
breeding	114674	PA_chr03	413988	PA_chr03:736497133-736497133	736497133	CHG	2.56187e-13	9.07847e-18
breeding	114674	PA_chr03	413988	PA_chr03:736497183-736497183	736497183	CHG	3.09929e-11	1.54715e-16
breeding	125381	PA_chr03	413988	PA_chr03:1219413915-1219413915	1219413915	CHG	9.23297e-13	2.60305e-12
breeding	125381	PA_chr03	413988	PA_chr03:1219413964-1219413964	1219413964	CHG	2.14344e-12	6.31988e-11
breeding	118053	PA_chr03	413993	PA_chr03:879180782-879180782	879180782	CHG	4.13311e-11	2.38066e-15
breeding	104825	PA_chr03	414002	PA_chr03:414016120-414016120	414016120	CHG	8.88842e-20	1.75663e-15
breeding	104825	PA_chr03	414002	PA_chr03:414016135-414016135	414016135	CHG	3.96996e-20	1.57365e-15
breeding	104825	PA_chr03	414002	PA_chr03:414016153-414016153	414016153	CHG	4.57181e-19	2.15683e-13
breeding	104825	PA_chr03	414002	PA_chr03:414016259-414016259	414016259	CHG	9.59488e-19	2.75366e-12
breeding	104825	PA_chr03	414002	PA_chr03:414016283-414016283	414016283	CHG	6.07895e-23	4.37435e-19
breeding	104825	PA_chr03	414002	PA_chr03:414016301-414016301	414016301	CHG	1.32094e-20	1.02114e-11
breeding	109962	PA_chr03	414002	PA_chr03:598407322-598407322	598407322	CHG	7.39371e-11	6.35993e-15
breeding	104826	PA_chr03	414053	PA_chr03:414016120-414016120	414016120	CHG	8.25202e-18	1.92005e-12
breeding	104826	PA_chr03	414053	PA_chr03:414016135-414016135	414016135	CHG	8.45931e-16	2.04222e-11
breeding	104826	PA_chr03	414053	PA_chr03:414016283-414016283	414016283	CHG	7.86936e-20	1.70913e-16
breeding	111819	PA_chr03	414053	PA_chr03:665427056-665427056	665427056	CHG	7.19621e-11	1.35873e-19
breeding	111819	PA_chr03	414053	PA_chr03:665427068-665427068	665427068	CHG	2.74456e-11	7.39652e-21
breeding	111819	PA_chr03	414053	PA_chr03:665427077-665427077	665427077	CHG	5.61375e-16	1.40193e-26
breeding	112478	PA_chr03	414053	PA_chr03:682526438-682526438	682526438	CHG	1.0936e-18	3.56833e-32
breeding	118055	PA_chr03	414053	PA_chr03:879180782-879180782	879180782	CHG	4.91059e-12	3.41101e-16
breeding	104827	PA_chr03	414056	PA_chr03:414016120-414016120	414016120	CHG	8.25202e-18	1.92005e-12
breeding	104827	PA_chr03	414056	PA_chr03:414016135-414016135	414016135	CHG	8.45931e-16	2.04222e-11
breeding	104827	PA_chr03	414056	PA_chr03:414016283-414016283	414016283	CHG	7.86936e-20	1.70913e-16
breeding	107773	PA_chr03	414056	PA_chr03:498294175-498294175	498294175	CHG	6.46903e-21	2.3253e-30
breeding	111820	PA_chr03	414056	PA_chr03:665427056-665427056	665427056	CHG	6.59288e-12	5.13395e-20
breeding	111820	PA_chr03	414056	PA_chr03:665427068-665427068	665427068	CHG	3.92899e-12	3.8392e-21
breeding	111820	PA_chr03	414056	PA_chr03:665427077-665427077	665427077	CHG	3.00329e-17	6.14749e-27
breeding	118056	PA_chr03	414056	PA_chr03:879180782-879180782	879180782	CHG	2.76929e-13	3.47978e-16
breeding	125385	PA_chr03	414056	PA_chr03:1219413915-1219413915	1219413915	CHG	6.99745e-11	3.93955e-25
breeding	125385	PA_chr03	414056	PA_chr03:1219413964-1219413964	1219413964	CHG	1.36902e-12	1.15296e-30
breeding	99030	PA_chr03	414056	PA_chr03:275184585-275184585	275184585	CHG	3.62224e-20	1.24884e-33
breeding	99094	PA_chr03	414056	PA_chr03:276145946-276145946	276145946	CHG	1.41171e-11	1.4463e-25
breeding	99094	PA_chr03	414056	PA_chr03:276146064-276146064	276146064	CHG	1.96544e-12	2.24832e-38
breeding	99094	PA_chr03	414056	PA_chr03:276146111-276146111	276146111	CHG	1.10279e-11	3.68876e-28
breeding	105400	PA_chr03	414073	PA_chr03:434251814-434251814	434251814	CHG	4.87269e-16	1.50287e-23
breeding	107774	PA_chr03	414073	PA_chr03:498294175-498294175	498294175	CHG	2.55627e-18	1.2536e-27
breeding	107775	PA_chr03	414076	PA_chr03:498294175-498294175	498294175	CHG	3.27073e-13	1.42475e-17
breeding	115464	PA_chr03	414076	PA_chr03:783995095-783995095	783995095	CHG	2.60772e-16	3.49063e-19
breeding	103147	PA_chr03	414907	PA_chr03:375243350-375243350	375243350	CHG	2.7443e-15	4.99647e-39
breeding	103147	PA_chr03	414907	PA_chr03:375243355-375243355	375243355	CHG	4.89698e-13	4.24861e-31
breeding	103147	PA_chr03	414907	PA_chr03:375243363-375243363	375243363	CHG	6.96946e-14	8.79593e-36
breeding	111616	PA_chr03	578328	PA_chr03:660440937-660440937	660440937	CHG	1.28487e-14	1.38696e-15
breeding	106402	PA_chr03	578358	PA_chr03:460871854-460871854	460871854	CHG	5.7361e-25	1.64635e-39
breeding	114687	PA_chr03	578401	PA_chr03:736497133-736497133	736497133	CHG	2.22696e-20	1.37886e-31
breeding	114687	PA_chr03	578401	PA_chr03:736497183-736497183	736497183	CHG	3.62078e-16	6.36499e-26
breeding	114687	PA_chr03	578401	PA_chr03:736497955-736497955	736497955	CHG	1.15875e-12	1.07972e-15
breeding	114687	PA_chr03	578401	PA_chr03:736497964-736497964	736497964	CHG	5.2207e-17	1.2865e-22
breeding	114687	PA_chr03	578401	PA_chr03:736497979-736497979	736497979	CHG	4.95039e-18	5.8538e-25
breeding	114687	PA_chr03	578401	PA_chr03:736498177-736498177	736498177	CHG	3.00996e-15	6.34711e-22
breeding	118066	PA_chr03	578431	PA_chr03:879180782-879180782	879180782	CHG	1.35052e-21	7.29733e-32
breeding	114689	PA_chr03	578464	PA_chr03:736497133-736497133	736497133	CHG	8.35379e-12	4.35383e-13
breeding	118067	PA_chr03	578464	PA_chr03:879180782-879180782	879180782	CHG	2.88792e-19	3.25997e-29
breeding	99105	PA_chr03	578464	PA_chr03:276145946-276145946	276145946	CHG	8.46677e-14	1.28428e-22
breeding	99105	PA_chr03	578464	PA_chr03:276145951-276145951	276145951	CHG	5.08299e-11	2.35118e-18
breeding	99105	PA_chr03	578464	PA_chr03:276145991-276145991	276145991	CHG	1.24701e-12	4.94078e-20
breeding	99105	PA_chr03	578464	PA_chr03:276145999-276145999	276145999	CHG	7.64567e-12	4.8081e-20
breeding	99105	PA_chr03	578464	PA_chr03:276146037-276146037	276146037	CHG	1.41171e-11	1.32297e-19
breeding	99105	PA_chr03	578464	PA_chr03:276146042-276146042	276146042	CHG	5.76621e-14	2.19846e-22
breeding	99105	PA_chr03	578464	PA_chr03:276146050-276146050	276146050	CHG	1.63633e-22	3.46772e-44
breeding	99105	PA_chr03	578464	PA_chr03:276146064-276146064	276146064	CHG	1.09397e-12	5.92662e-21
breeding	118848	PA_chr03	578465	PA_chr03:919450446-919450446	919450446	CHG	3.81796e-13	6.66076e-26
breeding	113486	PA_chr03	578540	PA_chr03:704227101-704227101	704227101	CHG	9.4363e-27	3.82006e-83
breeding	113486	PA_chr03	578540	PA_chr03:704227652-704227652	704227652	CHG	2.04139e-16	1.35847e-46
breeding	113486	PA_chr03	578540	PA_chr03:704227787-704227787	704227787	CHG	1.57491e-29	9.66516e-87
breeding	113486	PA_chr03	578540	PA_chr03:704227814-704227814	704227814	CHG	5.657e-15	1.6377e-39
breeding	113486	PA_chr03	578540	PA_chr03:704227832-704227832	704227832	CHG	8.7164e-28	8.13897e-86
breeding	116016	PA_chr03	578540	PA_chr03:810756833-810756833	810756833	CHG	5.97292e-13	3.78356e-28
breeding	120505	PA_chr03	578540	PA_chr03:1020091697-1020091697	1020091697	CHG	4.79016e-21	6.5851e-38
breeding	90737	PA_chr03	578540	PA_chr03:19774604-19774604	19774604	CHG	5.65576e-11	1.00153e-14
breeding	125400	PA_chr03	578577	PA_chr03:1219413915-1219413915	1219413915	CHG	3.90219e-12	5.84806e-23
breeding	125400	PA_chr03	578577	PA_chr03:1219413964-1219413964	1219413964	CHG	8.8199e-13	3.80331e-24
breeding	90740	PA_chr03	578628	PA_chr03:19774604-19774604	19774604	CHG	4.0289e-11	3.2188e-14
breeding	125403	PA_chr03	578668	PA_chr03:1219413911-1219413911	1219413911	CHG	3.32464e-11	2.98572e-18
breeding	99112	PA_chr03	578668	PA_chr03:276145951-276145951	276145951	CHG	2.6514e-11	1.08246e-13
breeding	125405	PA_chr03	578753	PA_chr03:1219413915-1219413915	1219413915	CHG	3.92009e-24	1.64306e-49
breeding	125405	PA_chr03	578753	PA_chr03:1219413964-1219413964	1219413964	CHG	3.81873e-16	7.04578e-23
breeding	101933	PA_chr03	578800	PA_chr03:356912482-356912482	356912482	CHG	1.29308e-21	2.45495e-36
breeding	106415	PA_chr03	578800	PA_chr03:460871854-460871854	460871854	CHG	8.83178e-15	9.56606e-26
breeding	125407	PA_chr03	578809	PA_chr03:1219413915-1219413915	1219413915	CHG	4.5124e-24	1.10883e-37
breeding	125407	PA_chr03	578809	PA_chr03:1219413964-1219413964	1219413964	CHG	2.59802e-27	2.89734e-47
breeding	91724	PA_chr03	578809	PA_chr03:61529444-61529444	61529444	CHG	7.08325e-12	1.78166e-21
breeding	91725	PA_chr03	578814	PA_chr03:61476245-61476245	61476245	CHG	1.24662e-13	8.574e-24
breeding	91725	PA_chr03	578814	PA_chr03:61476338-61476338	61476338	CHG	5.14292e-14	7.95298e-27
breeding	91725	PA_chr03	578814	PA_chr03:61476363-61476363	61476363	CHG	5.99118e-12	5.01809e-23
breeding	91725	PA_chr03	578814	PA_chr03:61476386-61476386	61476386	CHG	1.48663e-17	1.7203e-32
breeding	101937	PA_chr03	578836	PA_chr03:356912542-356912542	356912542	CHG	2.17343e-13	3.27407e-20
breeding	125411	PA_chr03	578837	PA_chr03:1219413915-1219413915	1219413915	CHG	1.02244e-12	1.48951e-22
breeding	125411	PA_chr03	578837	PA_chr03:1219413964-1219413964	1219413964	CHG	1.92848e-14	2.78105e-22
breeding	118129	PA_chr03	578914	PA_chr03:880505358-880505358	880505358	CHG	1.12922e-15	1.42366e-25
breeding	118129	PA_chr03	578914	PA_chr03:880505393-880505393	880505393	CHG	1.74731e-11	4.73196e-20
breeding	118129	PA_chr03	578914	PA_chr03:880505400-880505400	880505400	CHG	3.46511e-11	6.76705e-18
breeding	91734	PA_chr03	579080	PA_chr03:61529444-61529444	61529444	CHG	6.30662e-14	7.45702e-23
breeding	91736	PA_chr03	598321	PA_chr03:61529444-61529444	61529444	CHG	1.4705e-14	2.28885e-23
breeding	99153	PA_chr03	706510	PA_chr03:276145951-276145951	276145951	CHG	3.45758e-12	5.98992e-13
breeding	99154	PA_chr03	706531	PA_chr03:276145951-276145951	276145951	CHG	3.06507e-12	3.82834e-13
breeding	99155	PA_chr03	706628	PA_chr03:276145951-276145951	276145951	CHG	3.19178e-12	1.79378e-13
breeding	99157	PA_chr03	706664	PA_chr03:276146050-276146050	276146050	CHG	4.40323e-15	1.04712e-17
breeding	103210	PA_chr03	707181	PA_chr03:375243350-375243350	375243350	CHG	4.93583e-11	1.93384e-20
breeding	99160	PA_chr03	758408	PA_chr03:276145951-276145951	276145951	CHG	1.91336e-11	1.14055e-11
breeding	110034	PA_chr03	1059103	PA_chr03:598407322-598407322	598407322	CHG	1.29623e-11	6.23677e-15
breeding	110037	PA_chr03	1059290	PA_chr03:598407248-598407248	598407248	CHG	2.7831e-12	3.58797e-12
breeding	110037	PA_chr03	1059290	PA_chr03:598407322-598407322	598407322	CHG	4.62219e-13	1.37915e-13
breeding	99170	PA_chr03	1604810	PA_chr03:276146050-276146050	276146050	CHG	5.85625e-11	1.38773e-12
breeding	132365	PA_chr03_sUL005	57788	PA_chr03_sUL005:57504-57504	57504	CHG	2.37712e-28	7.75456e-82
breeding	132365	PA_chr03_sUL005	57788	PA_chr03_sUL005:57512-57512	57512	CHG	8.94103e-26	1.53123e-72
breeding	132365	PA_chr03_sUL005	57788	PA_chr03_sUL005:57521-57521	57521	CHG	9.56552e-28	1.37928e-78
breeding	132365	PA_chr03_sUL005	57788	PA_chr03_sUL005:57544-57544	57544	CHG	4.25953e-33	1.13188e-135
breeding	132365	PA_chr03_sUL005	57788	PA_chr03_sUL005:57569-57569	57569	CHG	1.40504e-32	1.27781e-140
breeding	132365	PA_chr03_sUL005	57788	PA_chr03_sUL005:57587-57587	57587	CHG	7.21256e-30	1.88812e-99
breeding	132365	PA_chr03_sUL005	57788	PA_chr03_sUL005:57614-57614	57614	CHG	1.57491e-29	2.28211e-101
breeding	132365	PA_chr03_sUL005	57788	PA_chr03_sUL005:57734-57734	57734	CHG	2.04539e-32	1.5883e-122
breeding	132365	PA_chr03_sUL005	57788	PA_chr03_sUL005:57740-57740	57740	CHG	4.47328e-31	8.9094e-112
breeding	132366	PA_chr03_sUL005	57809	PA_chr03_sUL005:57504-57504	57504	CHG	2.37712e-28	7.75456e-82
breeding	132366	PA_chr03_sUL005	57809	PA_chr03_sUL005:57512-57512	57512	CHG	8.94103e-26	1.53123e-72
breeding	132366	PA_chr03_sUL005	57809	PA_chr03_sUL005:57521-57521	57521	CHG	9.56552e-28	1.37928e-78
breeding	132366	PA_chr03_sUL005	57809	PA_chr03_sUL005:57544-57544	57544	CHG	4.25953e-33	1.13188e-135
breeding	132366	PA_chr03_sUL005	57809	PA_chr03_sUL005:57569-57569	57569	CHG	1.40504e-32	1.27781e-140
breeding	132366	PA_chr03_sUL005	57809	PA_chr03_sUL005:57587-57587	57587	CHG	7.21256e-30	1.88812e-99
breeding	132366	PA_chr03_sUL005	57809	PA_chr03_sUL005:57614-57614	57614	CHG	1.57491e-29	2.28211e-101
breeding	132366	PA_chr03_sUL005	57809	PA_chr03_sUL005:57734-57734	57734	CHG	2.04539e-32	1.5883e-122
breeding	132366	PA_chr03_sUL005	57809	PA_chr03_sUL005:57740-57740	57740	CHG	4.47328e-31	8.9094e-112
breeding	132367	PA_chr03_sUL005	57824	PA_chr03_sUL005:57504-57504	57504	CHG	2.37712e-28	7.75456e-82
breeding	132367	PA_chr03_sUL005	57824	PA_chr03_sUL005:57512-57512	57512	CHG	8.94103e-26	1.53123e-72
breeding	132367	PA_chr03_sUL005	57824	PA_chr03_sUL005:57521-57521	57521	CHG	9.56552e-28	1.37928e-78
breeding	132367	PA_chr03_sUL005	57824	PA_chr03_sUL005:57544-57544	57544	CHG	4.25953e-33	1.13188e-135
breeding	132367	PA_chr03_sUL005	57824	PA_chr03_sUL005:57569-57569	57569	CHG	1.40504e-32	1.27781e-140
breeding	132367	PA_chr03_sUL005	57824	PA_chr03_sUL005:57587-57587	57587	CHG	7.21256e-30	1.88812e-99
breeding	132367	PA_chr03_sUL005	57824	PA_chr03_sUL005:57614-57614	57614	CHG	1.57491e-29	2.28211e-101
breeding	132367	PA_chr03_sUL005	57824	PA_chr03_sUL005:57734-57734	57734	CHG	2.04539e-32	1.5883e-122
breeding	132367	PA_chr03_sUL005	57824	PA_chr03_sUL005:57740-57740	57740	CHG	4.47328e-31	8.9094e-112
breeding	132369	PA_chr03_sUL005	57864	PA_chr03_sUL005:57504-57504	57504	CHG	2.88193e-25	5.62399e-74
breeding	132369	PA_chr03_sUL005	57864	PA_chr03_sUL005:57512-57512	57512	CHG	3.59545e-25	9.1302e-73
breeding	132369	PA_chr03_sUL005	57864	PA_chr03_sUL005:57521-57521	57521	CHG	4.71293e-28	1.24658e-81
breeding	132369	PA_chr03_sUL005	57864	PA_chr03_sUL005:57544-57544	57544	CHG	4.51917e-32	5.00018e-132
breeding	132369	PA_chr03_sUL005	57864	PA_chr03_sUL005:57569-57569	57569	CHG	1.90772e-29	1.15075e-114
breeding	132369	PA_chr03_sUL005	57864	PA_chr03_sUL005:57587-57587	57587	CHG	1.49469e-26	2.04755e-87
breeding	132369	PA_chr03_sUL005	57864	PA_chr03_sUL005:57614-57614	57614	CHG	1.85996e-27	5.0764e-95
breeding	132369	PA_chr03_sUL005	57864	PA_chr03_sUL005:57734-57734	57734	CHG	2.55514e-28	4.0149e-101
breeding	132369	PA_chr03_sUL005	57864	PA_chr03_sUL005:57740-57740	57740	CHG	4.07066e-28	1.02334e-96
breeding	132370	PA_chr03_sUL005	57876	PA_chr03_sUL005:57504-57504	57504	CHG	1.07594e-18	5.66253e-49
breeding	132370	PA_chr03_sUL005	57876	PA_chr03_sUL005:57512-57512	57512	CHG	5.12277e-18	5.88618e-47
breeding	132370	PA_chr03_sUL005	57876	PA_chr03_sUL005:57521-57521	57521	CHG	1.80159e-20	1.53457e-49
breeding	132370	PA_chr03_sUL005	57876	PA_chr03_sUL005:57544-57544	57544	CHG	7.10458e-24	6.14336e-66
breeding	132370	PA_chr03_sUL005	57876	PA_chr03_sUL005:57569-57569	57569	CHG	3.62506e-23	1.02723e-64
breeding	132370	PA_chr03_sUL005	57876	PA_chr03_sUL005:57587-57587	57587	CHG	2.20132e-18	7.13489e-53
breeding	132370	PA_chr03_sUL005	57876	PA_chr03_sUL005:57614-57614	57614	CHG	2.53488e-20	1.35439e-55
breeding	132370	PA_chr03_sUL005	57876	PA_chr03_sUL005:57734-57734	57734	CHG	1.95532e-21	1.40761e-57
breeding	132370	PA_chr03_sUL005	57876	PA_chr03_sUL005:57740-57740	57740	CHG	9.04794e-20	5.08122e-53
breeding	152931	PA_chr04	165096	PA_chr04:752345039-752345039	752345039	CHG	2.64993e-11	1.51825e-15
breeding	155412	PA_chr04	165096	PA_chr04:858471640-858471640	858471640	CHG	4.40084e-12	1.90319e-11
breeding	152932	PA_chr04	165172	PA_chr04:752345039-752345039	752345039	CHG	3.08187e-15	8.30017e-25
breeding	155413	PA_chr04	165172	PA_chr04:858471640-858471640	858471640	CHG	1.24913e-17	1.80351e-26
breeding	155413	PA_chr04	165172	PA_chr04:858471643-858471643	858471643	CHG	1.13894e-13	9.34962e-14
breeding	155413	PA_chr04	165172	PA_chr04:858471664-858471664	858471664	CHG	2.49857e-12	8.26021e-13
breeding	155413	PA_chr04	165172	PA_chr04:858471682-858471682	858471682	CHG	3.18287e-13	2.15754e-12
breeding	155413	PA_chr04	165172	PA_chr04:858471731-858471731	858471731	CHG	1.98358e-12	4.71809e-12
breeding	155414	PA_chr04	165218	PA_chr04:858471640-858471640	858471640	CHG	4.08298e-16	2.77935e-21
breeding	155414	PA_chr04	165218	PA_chr04:858471643-858471643	858471643	CHG	2.04211e-12	1.71007e-13
breeding	155414	PA_chr04	165218	PA_chr04:858471664-858471664	858471664	CHG	6.2689e-11	1.81793e-12
breeding	155414	PA_chr04	165218	PA_chr04:858471682-858471682	858471682	CHG	5.76969e-12	4.72428e-12
breeding	138183	PA_chr04	234885	PA_chr04:185370628-185370628	185370628	CHG	8.04108e-29	1.38783e-62
breeding	138183	PA_chr04	234885	PA_chr04:185370690-185370690	185370690	CHG	8.05962e-21	3.15663e-34
breeding	138183	PA_chr04	234885	PA_chr04:185370753-185370753	185370753	CHG	8.37682e-15	2.03151e-20
breeding	138183	PA_chr04	234885	PA_chr04:185370759-185370759	185370759	CHG	1.51556e-36	1.63892e-110
breeding	138183	PA_chr04	234885	PA_chr04:185370799-185370799	185370799	CHG	8.89212e-11	1.01706e-13
breeding	148740	PA_chr04	234885	PA_chr04:572727553-572727553	572727553	CHG	1.2805e-17	8.01468e-29
breeding	150995	PA_chr04	234885	PA_chr04:657953014-657953014	657953014	CHG	4.57549e-11	4.43923e-15
breeding	134645	PA_chr04	235091	PA_chr04:74610660-74610660	74610660	CHG	5.55433e-24	6.58323e-52
breeding	134645	PA_chr04	235091	PA_chr04:74610711-74610711	74610711	CHG	1.71497e-17	1.00755e-26
breeding	134645	PA_chr04	235091	PA_chr04:74610745-74610745	74610745	CHG	6.08833e-21	2.67234e-39
breeding	138185	PA_chr04	235091	PA_chr04:185370628-185370628	185370628	CHG	3.33147e-25	2.80357e-45
breeding	138185	PA_chr04	235091	PA_chr04:185370690-185370690	185370690	CHG	3.73491e-18	1.25289e-26
breeding	138185	PA_chr04	235091	PA_chr04:185370753-185370753	185370753	CHG	1.47223e-14	1.30262e-19
breeding	138185	PA_chr04	235091	PA_chr04:185370759-185370759	185370759	CHG	8.27466e-33	1.30003e-66
breeding	148742	PA_chr04	235091	PA_chr04:572727553-572727553	572727553	CHG	3.82747e-19	8.5197e-30
breeding	138186	PA_chr04	235197	PA_chr04:185370628-185370628	185370628	CHG	8.04108e-29	1.38783e-62
breeding	138186	PA_chr04	235197	PA_chr04:185370690-185370690	185370690	CHG	8.05962e-21	3.15663e-34
breeding	138186	PA_chr04	235197	PA_chr04:185370753-185370753	185370753	CHG	8.37682e-15	2.03151e-20
breeding	138186	PA_chr04	235197	PA_chr04:185370759-185370759	185370759	CHG	1.51556e-36	1.63892e-110
breeding	138186	PA_chr04	235197	PA_chr04:185370799-185370799	185370799	CHG	8.89212e-11	1.01706e-13
breeding	152979	PA_chr04	235197	PA_chr04:759368752-759368752	759368752	CHG	5.42133e-12	7.36301e-16
breeding	133371	PA_chr04	235226	PA_chr04:37348908-37348908	37348908	CHG	1.50574e-22	2.26297e-36
breeding	138893	PA_chr04	235226	PA_chr04:212594386-212594386	212594386	CHG	3.47458e-20	1.13153e-24
breeding	138893	PA_chr04	235226	PA_chr04:212594398-212594398	212594398	CHG	5.72711e-11	2.66729e-12
breeding	138893	PA_chr04	235226	PA_chr04:212594439-212594439	212594439	CHG	1.6224e-13	3.21691e-14
breeding	144243	PA_chr04	235226	PA_chr04:410393607-410393607	410393607	CHG	4.02548e-14	2.67731e-22
breeding	145197	PA_chr04	235226	PA_chr04:449800220-449800220	449800220	CHG	1.68016e-36	3.6928e-113
breeding	152980	PA_chr04	235226	PA_chr04:759368752-759368752	759368752	CHG	5.42133e-12	1.44152e-35
breeding	163911	PA_chr04	235226	PA_chr04:1197400451-1197400451	1197400451	CHG	1.85842e-11	2.2596e-31
breeding	163911	PA_chr04	235226	PA_chr04:1197400461-1197400461	1197400461	CHG	5.42495e-13	5.42865e-35
breeding	163911	PA_chr04	235226	PA_chr04:1197400550-1197400550	1197400550	CHG	6.44315e-14	9.79575e-33
breeding	163911	PA_chr04	235226	PA_chr04:1197400581-1197400581	1197400581	CHG	7.82994e-18	5.40508e-48
breeding	163911	PA_chr04	235226	PA_chr04:1197400593-1197400593	1197400593	CHG	9.24465e-13	3.21906e-33
breeding	163911	PA_chr04	235226	PA_chr04:1197400597-1197400597	1197400597	CHG	2.20271e-18	1.15129e-47
breeding	163911	PA_chr04	235226	PA_chr04:1197400605-1197400605	1197400605	CHG	1.68817e-15	4.85406e-41
breeding	163911	PA_chr04	235226	PA_chr04:1197400678-1197400678	1197400678	CHG	8.46872e-14	5.48746e-37
breeding	163911	PA_chr04	235226	PA_chr04:1197400705-1197400705	1197400705	CHG	3.75038e-18	4.72683e-50
breeding	163911	PA_chr04	235226	PA_chr04:1197400714-1197400714	1197400714	CHG	8.21631e-17	1.71909e-45
breeding	163911	PA_chr04	235226	PA_chr04:1197400723-1197400723	1197400723	CHG	1.13115e-15	5.12107e-44
breeding	163911	PA_chr04	235226	PA_chr04:1197400743-1197400743	1197400743	CHG	3.9599e-17	9.36898e-48
breeding	163911	PA_chr04	235226	PA_chr04:1197400752-1197400752	1197400752	CHG	2.62493e-16	2.37778e-46
breeding	133372	PA_chr04	235304	PA_chr04:37348908-37348908	37348908	CHG	1.18731e-25	9.88892e-48
breeding	152981	PA_chr04	235304	PA_chr04:759368752-759368752	759368752	CHG	5.42133e-12	1.44152e-35
breeding	133258	PA_chr04	427536	PA_chr04:33141110-33141110	33141110	CHG	8.49338e-13	8.71226e-12
breeding	133373	PA_chr04	427536	PA_chr04:37348908-37348908	37348908	CHG	2.28455e-19	2.82909e-30
breeding	152982	PA_chr04	427536	PA_chr04:759368752-759368752	759368752	CHG	5.42133e-12	1.44152e-35
breeding	164733	PA_chr04	427536	PA_chr04:1213059455-1213059455	1213059455	CHG	2.19699e-14	7.45692e-15
breeding	133259	PA_chr04	427690	PA_chr04:33141110-33141110	33141110	CHG	3.63545e-16	9.66836e-15
breeding	133259	PA_chr04	427690	PA_chr04:33141161-33141161	33141161	CHG	1.72797e-15	8.02266e-12
breeding	152983	PA_chr04	427690	PA_chr04:759368752-759368752	759368752	CHG	5.42133e-12	1.44152e-35
breeding	166172	PA_chr04	427690	PA_chr04:1254314281-1254314281	1254314281	CHG	3.61389e-16	2.6447e-27
breeding	133037	PA_chr04	427845	PA_chr04:23566281-23566281	23566281	CHG	3.71217e-12	2.56612e-19
breeding	133260	PA_chr04	427845	PA_chr04:33141110-33141110	33141110	CHG	3.63545e-16	9.66836e-15
breeding	133260	PA_chr04	427845	PA_chr04:33141161-33141161	33141161	CHG	1.72797e-15	8.02266e-12
breeding	133375	PA_chr04	427845	PA_chr04:37348908-37348908	37348908	CHG	1.18731e-25	1.83623e-47
breeding	133038	PA_chr04	427852	PA_chr04:23566281-23566281	23566281	CHG	4.89704e-19	6.79043e-28
breeding	133376	PA_chr04	427852	PA_chr04:37348908-37348908	37348908	CHG	2.86283e-17	2.65763e-20
breeding	152985	PA_chr04	427852	PA_chr04:759368752-759368752	759368752	CHG	5.42133e-12	1.44152e-35
breeding	165669	PA_chr04	427870	PA_chr04:1223599285-1223599285	1223599285	CHG	1.47046e-12	1.33629e-12
breeding	138194	PA_chr04	428004	PA_chr04:185370628-185370628	185370628	CHG	1.64774e-17	1.34026e-40
breeding	138194	PA_chr04	428004	PA_chr04:185370759-185370759	185370759	CHG	8.47166e-19	2.80278e-51
breeding	157624	PA_chr04	428004	PA_chr04:936167934-936167934	936167934	CHG	1.91067e-13	4.05067e-21
breeding	157624	PA_chr04	428004	PA_chr04:936167947-936167947	936167947	CHG	3.84162e-13	3.94017e-22
breeding	157624	PA_chr04	428004	PA_chr04:936167955-936167955	936167955	CHG	3.37783e-15	2.56275e-26
breeding	157624	PA_chr04	428004	PA_chr04:936167977-936167977	936167977	CHG	2.67919e-15	7.29693e-27
breeding	157624	PA_chr04	428004	PA_chr04:936167992-936167992	936167992	CHG	8.03369e-15	3.37377e-25
breeding	157624	PA_chr04	428004	PA_chr04:936168098-936168098	936168098	CHG	7.34897e-13	1.54063e-19
breeding	164738	PA_chr04	428004	PA_chr04:1213059455-1213059455	1213059455	CHG	3.23715e-29	1.08354e-53
breeding	165670	PA_chr04	428004	PA_chr04:1223599285-1223599285	1223599285	CHG	1.47046e-12	1.33629e-12
breeding	157625	PA_chr04	428010	PA_chr04:936167934-936167934	936167934	CHG	9.61159e-14	4.20415e-21
breeding	157625	PA_chr04	428010	PA_chr04:936167947-936167947	936167947	CHG	2.41405e-13	4.67976e-22
breeding	157625	PA_chr04	428010	PA_chr04:936167955-936167955	936167955	CHG	1.95772e-15	3.063e-26
breeding	157625	PA_chr04	428010	PA_chr04:936167977-936167977	936167977	CHG	1.50617e-15	8.60571e-27
breeding	157625	PA_chr04	428010	PA_chr04:936167992-936167992	936167992	CHG	4.74139e-15	3.947e-25
breeding	157625	PA_chr04	428010	PA_chr04:936168098-936168098	936168098	CHG	4.73697e-13	1.78861e-19
breeding	164739	PA_chr04	428010	PA_chr04:1213059389-1213059389	1213059389	CHG	4.27144e-12	5.75511e-19
breeding	164739	PA_chr04	428010	PA_chr04:1213059422-1213059422	1213059422	CHG	1.59711e-11	5.19778e-18
breeding	164739	PA_chr04	428010	PA_chr04:1213059430-1213059430	1213059430	CHG	1.08042e-12	7.27893e-20
breeding	139020	PA_chr04	429096	PA_chr04:218867596-218867596	218867596	CHG	7.49009e-12	9.25858e-17
breeding	139020	PA_chr04	429096	PA_chr04:218867634-218867634	218867634	CHG	2.17354e-11	3.78703e-19
breeding	133969	PA_chr04	429178	PA_chr04:58985124-58985124	58985124	CHG	1.10872e-15	1.00534e-19
breeding	139022	PA_chr04	429178	PA_chr04:218867543-218867543	218867543	CHG	2.47499e-17	5.7853e-29
breeding	139022	PA_chr04	429178	PA_chr04:218867596-218867596	218867596	CHG	8.43649e-17	2.01078e-25
breeding	139022	PA_chr04	429178	PA_chr04:218867634-218867634	218867634	CHG	2.22569e-16	2.76211e-29
breeding	153959	PA_chr04	429178	PA_chr04:804856813-804856813	804856813	CHG	3.73474e-20	7.13739e-26
breeding	139023	PA_chr04	429192	PA_chr04:218867543-218867543	218867543	CHG	1.89671e-12	3.72618e-21
breeding	139023	PA_chr04	429192	PA_chr04:218867596-218867596	218867596	CHG	3.00444e-11	1.35835e-17
breeding	139023	PA_chr04	429192	PA_chr04:218867634-218867634	218867634	CHG	1.31839e-12	1.75891e-20
breeding	155431	PA_chr04	429192	PA_chr04:858471640-858471640	858471640	CHG	1.47604e-15	5.20544e-27
breeding	147214	PA_chr04	429214	PA_chr04:541182057-541182057	541182057	CHG	9.62067e-14	2.33809e-20
breeding	148759	PA_chr04	429218	PA_chr04:572727553-572727553	572727553	CHG	1.29401e-30	1.59858e-68
breeding	155433	PA_chr04	429218	PA_chr04:858471640-858471640	858471640	CHG	1.84725e-16	3.47638e-33
breeding	155433	PA_chr04	429218	PA_chr04:858471682-858471682	858471682	CHG	6.50202e-11	7.43586e-20
breeding	155433	PA_chr04	429218	PA_chr04:858471731-858471731	858471731	CHG	7.15539e-11	2.62786e-19
breeding	146791	PA_chr04	429223	PA_chr04:524399654-524399654	524399654	CHG	4.53357e-11	8.50835e-18
breeding	153963	PA_chr04	429223	PA_chr04:804856813-804856813	804856813	CHG	2.39048e-14	9.01101e-17
breeding	139027	PA_chr04	429230	PA_chr04:218867543-218867543	218867543	CHG	1.70934e-16	5.45157e-25
breeding	139027	PA_chr04	429230	PA_chr04:218867596-218867596	218867596	CHG	3.94185e-14	1.0173e-20
breeding	139027	PA_chr04	429230	PA_chr04:218867634-218867634	218867634	CHG	4.41099e-15	4.56658e-27
breeding	164747	PA_chr04	429230	PA_chr04:1213059455-1213059455	1213059455	CHG	3.23715e-29	1.08354e-53
breeding	166185	PA_chr04	429230	PA_chr04:1254314281-1254314281	1254314281	CHG	5.54577e-13	1.61782e-24
breeding	139028	PA_chr04	429231	PA_chr04:218867634-218867634	218867634	CHG	7.94299e-11	2.39749e-19
breeding	151822	PA_chr04	429231	PA_chr04:694969776-694969776	694969776	CHG	8.93947e-14	4.16276e-17
breeding	151822	PA_chr04	429231	PA_chr04:694969796-694969796	694969796	CHG	1.30562e-23	1.1311e-39
breeding	151822	PA_chr04	429231	PA_chr04:694969804-694969804	694969804	CHG	8.04108e-29	5.66176e-58
breeding	151822	PA_chr04	429231	PA_chr04:694969825-694969825	694969825	CHG	3.23715e-29	1.72199e-59
breeding	151822	PA_chr04	429231	PA_chr04:694969848-694969848	694969848	CHG	2.23332e-27	2.50972e-51
breeding	151822	PA_chr04	429231	PA_chr04:694969854-694969854	694969854	CHG	2.93934e-19	5.40201e-29
breeding	151822	PA_chr04	429231	PA_chr04:694969910-694969910	694969910	CHG	8.2727e-31	3.27257e-67
breeding	146794	PA_chr04	429233	PA_chr04:524399654-524399654	524399654	CHG	2.10481e-13	3.15015e-18
breeding	151823	PA_chr04	429233	PA_chr04:694969776-694969776	694969776	CHG	4.13737e-15	1.01964e-17
breeding	151823	PA_chr04	429233	PA_chr04:694969796-694969796	694969796	CHG	7.47204e-26	8.95798e-40
breeding	151823	PA_chr04	429233	PA_chr04:694969804-694969804	694969804	CHG	2.3582e-31	1.69491e-57
breeding	151823	PA_chr04	429233	PA_chr04:694969825-694969825	694969825	CHG	7.79769e-32	6.49751e-59
breeding	151823	PA_chr04	429233	PA_chr04:694969848-694969848	694969848	CHG	1.0143e-29	4.63442e-52
breeding	151823	PA_chr04	429233	PA_chr04:694969854-694969854	694969854	CHG	4.05175e-21	1.92853e-29
breeding	151823	PA_chr04	429233	PA_chr04:694969910-694969910	694969910	CHG	1.51837e-31	4.36848e-61
breeding	133978	PA_chr04	429309	PA_chr04:58985124-58985124	58985124	CHG	1.02244e-12	4.47598e-14
breeding	155440	PA_chr04	429359	PA_chr04:858471640-858471640	858471640	CHG	2.43816e-12	2.62635e-20
breeding	133981	PA_chr04	429374	PA_chr04:58985124-58985124	58985124	CHG	4.02297e-14	2.54459e-19
breeding	164433	PA_chr04	429460	PA_chr04:1204581182-1204581182	1204581182	CHG	7.21572e-20	1.76347e-28
breeding	166193	PA_chr04	429460	PA_chr04:1254314281-1254314281	1254314281	CHG	2.00035e-14	7.04918e-26
breeding	164434	PA_chr04	429461	PA_chr04:1204581182-1204581182	1204581182	CHG	7.21572e-20	1.76347e-28
breeding	133403	PA_chr04	1346365	PA_chr04:37348908-37348908	37348908	CHG	2.874e-19	1.44675e-32
breeding	146808	PA_chr04	1346365	PA_chr04:524399707-524399707	524399707	CHG	6.03227e-20	1.50888e-48
breeding	134625	PA_chr04	2306202	PA_chr04:74045422-74045422	74045422	CHG	8.97564e-13	6.8076e-18
breeding	134625	PA_chr04	2306202	PA_chr04:74045453-74045453	74045453	CHG	1.45258e-14	3.83641e-20
breeding	134625	PA_chr04	2306202	PA_chr04:74045505-74045505	74045505	CHG	2.20594e-16	3.10279e-22
breeding	134625	PA_chr04	2306202	PA_chr04:74045565-74045565	74045565	CHG	3.38073e-13	2.57647e-18
breeding	134626	PA_chr04	2306240	PA_chr04:74045422-74045422	74045422	CHG	8.97564e-13	6.8076e-18
breeding	134626	PA_chr04	2306240	PA_chr04:74045453-74045453	74045453	CHG	1.45258e-14	3.83641e-20
breeding	134626	PA_chr04	2306240	PA_chr04:74045505-74045505	74045505	CHG	2.20594e-16	3.10279e-22
breeding	134626	PA_chr04	2306240	PA_chr04:74045565-74045565	74045565	CHG	3.38073e-13	2.57647e-18
breeding	141853	PA_chr04	2306461	PA_chr04:333965335-333965335	333965335	CHG	4.83619e-11	4.6364e-17
breeding	141854	PA_chr04	2692613	PA_chr04:333965335-333965335	333965335	CHG	1.82957e-11	6.79924e-17
breeding	153897	PA_chr04	2692691	PA_chr04:804199798-804199798	804199798	CHG	4.99603e-11	1.10014e-17
breeding	144069	PA_chr04	2692725	PA_chr04:405190969-405190969	405190969	CHG	1.80003e-22	3.71825e-36
breeding	151469	PA_chr04	4966007	PA_chr04:676906245-676906245	676906245	CHG	1.34084e-11	1.22824e-17
breeding	151469	PA_chr04	4966007	PA_chr04:676906272-676906272	676906272	CHG	4.95734e-11	2.26758e-16
breeding	151474	PA_chr04	4966045	PA_chr04:676906245-676906245	676906245	CHG	1.34084e-11	1.22824e-17
breeding	151474	PA_chr04	4966045	PA_chr04:676906272-676906272	676906272	CHG	4.95734e-11	2.26758e-16
breeding	151476	PA_chr04	4966053	PA_chr04:676906269-676906269	676906269	CHG	3.32553e-11	1.54395e-21
breeding	151482	PA_chr04	4966145	PA_chr04:676906272-676906272	676906272	CHG	7.88941e-11	7.94342e-17
breeding	205621	PA_chr05	1426549	PA_chr05:1394434584-1394434584	1394434584	CHG	8.75856e-13	8.80116e-25
breeding	205621	PA_chr05	1426549	PA_chr05:1394434603-1394434603	1394434603	CHG	5.35499e-11	2.30233e-22
breeding	200633	PA_chr05	1426582	PA_chr05:1214276730-1214276730	1214276730	CHG	1.0463e-12	1.32496e-24
breeding	173172	PA_chr05	1426598	PA_chr05:126806914-126806914	126806914	CHG	6.71812e-11	3.88048e-20
breeding	186123	PA_chr05	1426598	PA_chr05:687865492-687865492	687865492	CHG	1.84462e-18	2.82764e-24
breeding	194257	PA_chr05	1426598	PA_chr05:977132489-977132489	977132489	CHG	2.1631e-15	7.51293e-11
breeding	198409	PA_chr05	1426598	PA_chr05:1130495122-1130495122	1130495122	CHG	2.43155e-12	1.94598e-19
breeding	178721	PA_chr05	1426665	PA_chr05:337269863-337269863	337269863	CHG	1.97064e-14	1.50857e-25
breeding	196747	PA_chr05	1426727	PA_chr05:1086696661-1086696661	1086696661	CHG	7.83637e-37	8.67584e-96
breeding	173175	PA_chr05	1426794	PA_chr05:126806804-126806804	126806804	CHG	2.56291e-12	3.70426e-16
breeding	185597	PA_chr05	1426794	PA_chr05:668252428-668252428	668252428	CHG	7.68683e-11	1.94834e-21
breeding	170919	PA_chr05	1426844	PA_chr05:42588081-42588081	42588081	CHG	4.8021e-15	9.47518e-24
breeding	170919	PA_chr05	1426844	PA_chr05:42588101-42588101	42588101	CHG	4.13763e-11	2.12022e-13
breeding	186496	PA_chr05	1426844	PA_chr05:700324660-700324660	700324660	CHG	4.25662e-22	7.97732e-43
breeding	193069	PA_chr05	1426844	PA_chr05:921358731-921358731	921358731	CHG	2.17871e-11	1.25705e-14
breeding	193069	PA_chr05	1426844	PA_chr05:921358820-921358820	921358820	CHG	8.04418e-15	7.71632e-23
breeding	193069	PA_chr05	1426844	PA_chr05:921358862-921358862	921358862	CHG	6.96618e-14	2.70519e-22
breeding	193069	PA_chr05	1426844	PA_chr05:921358883-921358883	921358883	CHG	1.83791e-13	5.16862e-20
breeding	201673	PA_chr05	1426844	PA_chr05:1235387188-1235387188	1235387188	CHG	4.91941e-14	1.6266e-15
breeding	201673	PA_chr05	1426844	PA_chr05:1235387258-1235387258	1235387258	CHG	5.2998e-16	1.07085e-20
breeding	201673	PA_chr05	1426844	PA_chr05:1235387349-1235387349	1235387349	CHG	1.59338e-22	2.42024e-38
breeding	170920	PA_chr05	1427660	PA_chr05:42588081-42588081	42588081	CHG	4.8021e-15	9.47518e-24
breeding	170920	PA_chr05	1427660	PA_chr05:42588101-42588101	42588101	CHG	4.13763e-11	2.12022e-13
breeding	173501	PA_chr05	1427660	PA_chr05:140473500-140473500	140473500	CHG	1.95574e-20	7.94145e-25
breeding	198414	PA_chr05	1427660	PA_chr05:1130495122-1130495122	1130495122	CHG	4.60205e-13	6.17077e-19
breeding	170921	PA_chr05	1427665	PA_chr05:42588081-42588081	42588081	CHG	5.24388e-19	5.05294e-36
breeding	170921	PA_chr05	1427665	PA_chr05:42588101-42588101	42588101	CHG	5.13449e-14	1.04588e-17
breeding	192039	PA_chr05	1427665	PA_chr05:897194015-897194015	897194015	CHG	1.99536e-11	1.61219e-18
breeding	201675	PA_chr05	1427665	PA_chr05:1235345038-1235345038	1235345038	CHG	4.73952e-12	2.66819e-14
breeding	174877	PA_chr05	1427790	PA_chr05:177416662-177416662	177416662	CHG	2.38501e-13	9.88672e-30
breeding	174877	PA_chr05	1427790	PA_chr05:177416697-177416697	177416697	CHG	6.42547e-11	4.93712e-20
breeding	196752	PA_chr05	1427790	PA_chr05:1086696661-1086696661	1086696661	CHG	2.05688e-21	2.12068e-21
breeding	201676	PA_chr05	1427790	PA_chr05:1235345038-1235345038	1235345038	CHG	4.73952e-12	7.0976e-14
breeding	180332	PA_chr05	1427809	PA_chr05:399179652-399179652	399179652	CHG	1.32401e-26	2.32898e-46
breeding	196753	PA_chr05	1427809	PA_chr05:1086696661-1086696661	1086696661	CHG	2.05688e-21	2.12068e-21
breeding	201677	PA_chr05	1427809	PA_chr05:1235344884-1235344884	1235344884	CHG	2.14242e-28	5.73884e-42
breeding	170924	PA_chr05	1427819	PA_chr05:42588081-42588081	42588081	CHG	5.24388e-19	5.05294e-36
breeding	170924	PA_chr05	1427819	PA_chr05:42588101-42588101	42588101	CHG	5.13449e-14	1.04588e-17
breeding	178948	PA_chr05	1427819	PA_chr05:342317872-342317872	342317872	CHG	1.50257e-16	6.59623e-16
breeding	179846	PA_chr05	1427819	PA_chr05:379047049-379047049	379047049	CHG	6.65887e-15	3.78789e-20
breeding	179846	PA_chr05	1427819	PA_chr05:379143559-379143559	379143559	CHG	4.86567e-13	1.76708e-13
breeding	170925	PA_chr05	1427838	PA_chr05:42588081-42588081	42588081	CHG	5.24388e-19	5.05294e-36
breeding	170925	PA_chr05	1427838	PA_chr05:42588101-42588101	42588101	CHG	5.13449e-14	1.04588e-17
breeding	170926	PA_chr05	1503852	PA_chr05:42588081-42588081	42588081	CHG	5.24388e-19	5.05294e-36
breeding	170926	PA_chr05	1503852	PA_chr05:42588101-42588101	42588101	CHG	5.13449e-14	1.04588e-17
breeding	188849	PA_chr05	1503852	PA_chr05:781596768-781596768	781596768	CHG	1.97211e-17	8.13704e-24
breeding	170927	PA_chr05	2235047	PA_chr05:42588081-42588081	42588081	CHG	5.24388e-19	5.05294e-36
breeding	170927	PA_chr05	2235047	PA_chr05:42588101-42588101	42588101	CHG	5.13449e-14	1.04588e-17
breeding	171714	PA_chr05	2235047	PA_chr05:66254725-66254725	66254725	CHG	1.62622e-13	1.00383e-14
breeding	184126	PA_chr05	2235047	PA_chr05:566064809-566064809	566064809	CHG	1.43282e-31	7.10772e-75
breeding	208008	PA_chr05	2235047	PA_chr05:1477494746-1477494746	1477494746	CHG	6.0433e-18	4.94887e-19
breeding	170928	PA_chr05	2235071	PA_chr05:42588081-42588081	42588081	CHG	5.24388e-19	5.05294e-36
breeding	170928	PA_chr05	2235071	PA_chr05:42588101-42588101	42588101	CHG	5.13449e-14	1.04588e-17
breeding	172387	PA_chr05	2235071	PA_chr05:99621231-99621231	99621231	CHG	5.21227e-11	6.44687e-26
breeding	172949	PA_chr05	2235071	PA_chr05:122538934-122538934	122538934	CHG	1.25195e-13	3.48366e-17
breeding	208009	PA_chr05	2235071	PA_chr05:1477494746-1477494746	1477494746	CHG	8.38133e-17	1.54313e-18
breeding	170929	PA_chr05	2235087	PA_chr05:42588081-42588081	42588081	CHG	5.24388e-19	5.05294e-36
breeding	170929	PA_chr05	2235087	PA_chr05:42588101-42588101	42588101	CHG	5.13449e-14	1.04588e-17
breeding	184128	PA_chr05	2235087	PA_chr05:566064809-566064809	566064809	CHG	1.4903e-16	2.02514e-33
breeding	184670	PA_chr05	2235087	PA_chr05:615574565-615574565	615574565	CHG	9.24135e-13	2.25015e-20
breeding	178955	PA_chr05	2235095	PA_chr05:342317872-342317872	342317872	CHG	9.35404e-12	1.0209e-11
breeding	184671	PA_chr05	2235095	PA_chr05:615574565-615574565	615574565	CHG	1.22702e-20	4.36308e-37
breeding	172094	PA_chr05	2235106	PA_chr05:95430852-95430852	95430852	CHG	5.58904e-12	1.19001e-21
breeding	179855	PA_chr05	2235157	PA_chr05:379047049-379047049	379047049	CHG	6.65887e-15	3.78789e-20
breeding	179855	PA_chr05	2235157	PA_chr05:379143559-379143559	379143559	CHG	4.86567e-13	1.76708e-13
breeding	183548	PA_chr05	2235157	PA_chr05:536446284-536446284	536446284	CHG	6.15074e-18	5.36239e-35
breeding	195222	PA_chr05	2235157	PA_chr05:1030559348-1030559348	1030559348	CHG	5.13855e-15	2.73556e-24
breeding	207872	PA_chr05	2235157	PA_chr05:1467147267-1467147267	1467147267	CHG	7.29579e-20	4.10895e-35
breeding	184784	PA_chr05	2235198	PA_chr05:623327378-623327378	623327378	CHG	6.41643e-17	4.2705e-17
breeding	185613	PA_chr05	2235198	PA_chr05:668252428-668252428	668252428	CHG	2.8995e-11	6.38439e-27
breeding	207873	PA_chr05	2235198	PA_chr05:1467147267-1467147267	1467147267	CHG	7.29579e-20	4.10895e-35
breeding	171674	PA_chr05	2235264	PA_chr05:66127590-66127590	66127590	CHG	7.7948e-15	7.45883e-11
breeding	171674	PA_chr05	2235264	PA_chr05:66127614-66127614	66127614	CHG	8.34665e-15	8.01611e-12
breeding	179857	PA_chr05	2235264	PA_chr05:379047049-379047049	379047049	CHG	6.65887e-15	3.78789e-20
breeding	179857	PA_chr05	2235264	PA_chr05:379143559-379143559	379143559	CHG	4.86567e-13	1.76708e-13
breeding	188858	PA_chr05	2235264	PA_chr05:781596768-781596768	781596768	CHG	4.39397e-18	1.24052e-25
breeding	191782	PA_chr05	2235276	PA_chr05:872337700-872337700	872337700	CHG	2.68688e-11	6.97297e-27
breeding	191782	PA_chr05	2235276	PA_chr05:872337718-872337718	872337718	CHG	2.03404e-13	6.12345e-35
breeding	191782	PA_chr05	2235276	PA_chr05:872337778-872337778	872337778	CHG	2.11416e-13	8.48763e-37
breeding	191782	PA_chr05	2235276	PA_chr05:872337791-872337791	872337791	CHG	1.53058e-12	1.27656e-34
breeding	191782	PA_chr05	2235276	PA_chr05:872337805-872337805	872337805	CHG	3.02566e-12	1.15467e-34
breeding	191782	PA_chr05	2235276	PA_chr05:872337910-872337910	872337910	CHG	1.57387e-11	2.51924e-31
breeding	191782	PA_chr05	2235276	PA_chr05:872337953-872337953	872337953	CHG	1.31839e-12	5.95551e-32
breeding	195226	PA_chr05	2235277	PA_chr05:1030559368-1030559368	1030559368	CHG	5.69123e-11	4.20684e-29
breeding	195226	PA_chr05	2235277	PA_chr05:1030559451-1030559451	1030559451	CHG	4.72575e-11	8.06043e-33
breeding	195226	PA_chr05	2235277	PA_chr05:1030559576-1030559576	1030559576	CHG	6.59626e-15	7.90754e-38
breeding	195226	PA_chr05	2235277	PA_chr05:1030559590-1030559590	1030559590	CHG	4.86026e-11	7.29983e-30
breeding	202579	PA_chr05	2235277	PA_chr05:1263004727-1263004727	1263004727	CHG	1.25664e-13	1.72119e-16
breeding	202579	PA_chr05	2235277	PA_chr05:1263004834-1263004834	1263004834	CHG	2.21983e-19	1.23376e-28
breeding	202580	PA_chr05	2235286	PA_chr05:1263004727-1263004727	1263004727	CHG	1.25664e-13	1.72119e-16
breeding	202580	PA_chr05	2235286	PA_chr05:1263004834-1263004834	1263004834	CHG	2.21983e-19	1.23376e-28
breeding	179861	PA_chr05	2235312	PA_chr05:379047049-379047049	379047049	CHG	6.65887e-15	3.78789e-20
breeding	179861	PA_chr05	2235312	PA_chr05:379143559-379143559	379143559	CHG	4.86567e-13	1.76708e-13
breeding	191785	PA_chr05	2235312	PA_chr05:872337718-872337718	872337718	CHG	2.49123e-12	1.39753e-30
breeding	191785	PA_chr05	2235312	PA_chr05:872337778-872337778	872337778	CHG	9.20248e-16	5.03432e-38
breeding	191785	PA_chr05	2235312	PA_chr05:872337791-872337791	872337791	CHG	9.26399e-16	8.26375e-39
breeding	191785	PA_chr05	2235312	PA_chr05:872337805-872337805	872337805	CHG	7.29918e-14	8.7835e-33
breeding	191785	PA_chr05	2235312	PA_chr05:872337910-872337910	872337910	CHG	3.48838e-13	2.20771e-31
breeding	191785	PA_chr05	2235312	PA_chr05:872337953-872337953	872337953	CHG	1.47223e-14	1.12493e-31
breeding	202581	PA_chr05	2235312	PA_chr05:1263004834-1263004834	1263004834	CHG	5.19846e-15	3.44016e-20
breeding	191786	PA_chr05	2235341	PA_chr05:872337655-872337655	872337655	CHG	4.01191e-12	1.10309e-18
breeding	191786	PA_chr05	2235341	PA_chr05:872337700-872337700	872337700	CHG	1.03072e-13	4.52805e-23
breeding	191786	PA_chr05	2235341	PA_chr05:872337718-872337718	872337718	CHG	6.49304e-18	1.04712e-32
breeding	191786	PA_chr05	2235341	PA_chr05:872337751-872337751	872337751	CHG	3.86471e-12	9.78759e-20
breeding	191786	PA_chr05	2235341	PA_chr05:872337778-872337778	872337778	CHG	1.62784e-18	5.11881e-34
breeding	191786	PA_chr05	2235341	PA_chr05:872337791-872337791	872337791	CHG	1.00828e-19	3.88715e-37
breeding	191786	PA_chr05	2235341	PA_chr05:872337805-872337805	872337805	CHG	1.66162e-17	2.66564e-32
breeding	191786	PA_chr05	2235341	PA_chr05:872337910-872337910	872337910	CHG	3.36196e-16	9.13645e-29
breeding	191786	PA_chr05	2235341	PA_chr05:872337953-872337953	872337953	CHG	1.87287e-16	6.49788e-29
breeding	200968	PA_chr05	2235341	PA_chr05:1222359790-1222359790	1222359790	CHG	1.63608e-15	2.11809e-28
breeding	191787	PA_chr05	2235370	PA_chr05:872337718-872337718	872337718	CHG	9.22906e-14	7.06511e-32
breeding	191787	PA_chr05	2235370	PA_chr05:872337778-872337778	872337778	CHG	4.56749e-18	5.86e-43
breeding	191787	PA_chr05	2235370	PA_chr05:872337791-872337791	872337791	CHG	9.44074e-19	6.79041e-45
breeding	191787	PA_chr05	2235370	PA_chr05:872337805-872337805	872337805	CHG	5.16158e-16	6.22839e-37
breeding	191787	PA_chr05	2235370	PA_chr05:872337910-872337910	872337910	CHG	2.02153e-13	4.33083e-30
breeding	191787	PA_chr05	2235370	PA_chr05:872337953-872337953	872337953	CHG	1.88252e-15	2.93997e-33
breeding	172963	PA_chr05	2235379	PA_chr05:122538934-122538934	122538934	CHG	1.7995e-12	1.24409e-16
breeding	188571	PA_chr05	2235379	PA_chr05:778174476-778174476	778174476	CHG	6.53567e-12	3.04436e-22
breeding	207550	PA_chr05	2235379	PA_chr05:1458724026-1458724026	1458724026	CHG	1.16102e-18	8.42225e-13
breeding	200005	PA_chr05	2235488	PA_chr05:1193421341-1193421341	1193421341	CHG	2.85727e-29	1.35392e-74
breeding	207551	PA_chr05	2235488	PA_chr05:1458724026-1458724026	1458724026	CHG	1.16102e-18	8.42225e-13
breeding	208024	PA_chr05	2235488	PA_chr05:1477494746-1477494746	1477494746	CHG	6.62366e-24	6.72555e-45
breeding	172107	PA_chr05	2235489	PA_chr05:95430852-95430852	95430852	CHG	2.14775e-16	3.96715e-29
breeding	200006	PA_chr05	2235489	PA_chr05:1193421341-1193421341	1193421341	CHG	7.42899e-30	2.22753e-73
breeding	186758	PA_chr05	3180288	PA_chr05:708117452-708117452	708117452	CHG	1.74274e-15	2.1894e-24
breeding	186758	PA_chr05	3180288	PA_chr05:708117567-708117567	708117567	CHG	1.73314e-12	3.4048e-23
breeding	186758	PA_chr05	3180288	PA_chr05:708117573-708117573	708117573	CHG	7.52051e-11	2.04344e-17
breeding	186758	PA_chr05	3180288	PA_chr05:708117577-708117577	708117577	CHG	2.43558e-11	3.43173e-19
breeding	191793	PA_chr05	3180531	PA_chr05:872337655-872337655	872337655	CHG	1.13915e-11	1.5167e-18
breeding	191793	PA_chr05	3180531	PA_chr05:872337700-872337700	872337700	CHG	5.92319e-13	3.06494e-23
breeding	191793	PA_chr05	3180531	PA_chr05:872337718-872337718	872337718	CHG	2.26476e-16	6.31516e-33
breeding	191793	PA_chr05	3180531	PA_chr05:872337751-872337751	872337751	CHG	4.45648e-11	1.11747e-19
breeding	191793	PA_chr05	3180531	PA_chr05:872337778-872337778	872337778	CHG	7.52693e-17	1.31589e-33
breeding	191793	PA_chr05	3180531	PA_chr05:872337791-872337791	872337791	CHG	4.20242e-18	6.35444e-37
breeding	191793	PA_chr05	3180531	PA_chr05:872337805-872337805	872337805	CHG	1.09116e-17	6.40468e-33
breeding	191793	PA_chr05	3180531	PA_chr05:872337910-872337910	872337910	CHG	6.05146e-15	3.6023e-29
breeding	191793	PA_chr05	3180531	PA_chr05:872337953-872337953	872337953	CHG	1.06641e-14	7.58986e-29
breeding	171689	PA_chr05	3180600	PA_chr05:66127598-66127598	66127598	CHG	4.93583e-11	5.24578e-12
breeding	183567	PA_chr05	3180651	PA_chr05:536446284-536446284	536446284	CHG	4.41099e-15	4.10137e-30
breeding	202596	PA_chr05	3304399	PA_chr05:1263004727-1263004727	1263004727	CHG	1.34181e-14	3.63403e-19
breeding	202596	PA_chr05	3304399	PA_chr05:1263004834-1263004834	1263004834	CHG	6.32581e-20	1.05081e-29
breeding	183569	PA_chr05	3304456	PA_chr05:536446284-536446284	536446284	CHG	7.71774e-21	8.08676e-46
breeding	170973	PA_chr05	3304480	PA_chr05:42825395-42825395	42825395	CHG	4.77421e-11	8.45606e-24
breeding	170973	PA_chr05	3304480	PA_chr05:42825441-42825441	42825441	CHG	7.29504e-12	4.62932e-26
breeding	172118	PA_chr05	3304480	PA_chr05:95430852-95430852	95430852	CHG	6.44673e-18	1.04534e-30
breeding	183572	PA_chr05	3304550	PA_chr05:536446284-536446284	536446284	CHG	7.71774e-21	3.64806e-48
breeding	174753	PA_chr05	3304574	PA_chr05:171892808-171892808	171892808	CHG	6.68613e-21	1.16368e-27
breeding	174753	PA_chr05	3304574	PA_chr05:171892814-171892814	171892814	CHG	9.12754e-20	2.91684e-30
breeding	174753	PA_chr05	3304574	PA_chr05:171892838-171892838	171892838	CHG	1.08204e-18	5.22684e-27
breeding	174753	PA_chr05	3304574	PA_chr05:171892856-171892856	171892856	CHG	2.03581e-14	1.24837e-19
breeding	174753	PA_chr05	3304574	PA_chr05:171892897-171892897	171892897	CHG	3.56402e-20	3.78868e-30
breeding	174753	PA_chr05	3304574	PA_chr05:171892901-171892901	171892901	CHG	1.72003e-20	2.2156e-31
breeding	174753	PA_chr05	3304574	PA_chr05:171892926-171892926	171892926	CHG	7.10447e-20	2.47146e-30
breeding	174753	PA_chr05	3304574	PA_chr05:171892961-171892961	171892961	CHG	2.9746e-15	3.80471e-20
breeding	174753	PA_chr05	3304574	PA_chr05:171892973-171892973	171892973	CHG	3.93031e-16	2.96462e-22
breeding	174753	PA_chr05	3304574	PA_chr05:171892993-171892993	171892993	CHG	2.32926e-14	4.42334e-17
breeding	174753	PA_chr05	3304574	PA_chr05:171893001-171893001	171893001	CHG	1.02463e-17	6.60722e-23
breeding	183573	PA_chr05	3304574	PA_chr05:536446284-536446284	536446284	CHG	1.78632e-18	9.0781e-47
breeding	202601	PA_chr05	3304574	PA_chr05:1263004834-1263004834	1263004834	CHG	1.84513e-11	8.03985e-13
breeding	183574	PA_chr05	3304606	PA_chr05:536446284-536446284	536446284	CHG	1.78632e-18	9.0781e-47
breeding	202603	PA_chr05	3304758	PA_chr05:1263004834-1263004834	1263004834	CHG	2.51569e-33	4.46934e-72
breeding	202605	PA_chr05	3481726	PA_chr05:1263004834-1263004834	1263004834	CHG	4.88273e-14	3.49429e-17
breeding	183578	PA_chr05	3481741	PA_chr05:536446284-536446284	536446284	CHG	5.28578e-15	3.38567e-27
breeding	202606	PA_chr05	3481741	PA_chr05:1263004834-1263004834	1263004834	CHG	3.29936e-14	5.55572e-17
breeding	200033	PA_chr05	3481870	PA_chr05:1193421341-1193421341	1193421341	CHG	1.31373e-17	4.34921e-43
breeding	191818	PA_chr05	3481873	PA_chr05:872337766-872337766	872337766	CHG	7.32939e-13	5.53319e-17
breeding	189252	PA_chr05	3481874	PA_chr05:786587909-786587909	786587909	CHG	1.54617e-17	3.40668e-25
breeding	200035	PA_chr05	3481874	PA_chr05:1193421341-1193421341	1193421341	CHG	6.35161e-12	6.16247e-12
breeding	200041	PA_chr05	3481929	PA_chr05:1193421341-1193421341	1193421341	CHG	6.54666e-30	1.85079e-43
breeding	197566	PA_chr05	3481930	PA_chr05:1108368418-1108368418	1108368418	CHG	7.83637e-37	6.74428e-70
breeding	197568	PA_chr05	3481958	PA_chr05:1108368418-1108368418	1108368418	CHG	7.83637e-37	2.27786e-41
breeding	200714	PA_chr05	3481981	PA_chr05:1214736667-1214736667	1214736667	CHG	7.02616e-15	6.01134e-12
breeding	191841	PA_chr05	3481999	PA_chr05:872337700-872337700	872337700	CHG	3.8117e-13	2.9607e-15
breeding	191841	PA_chr05	3481999	PA_chr05:872337718-872337718	872337718	CHG	2.09861e-17	6.01347e-21
breeding	191841	PA_chr05	3481999	PA_chr05:872337751-872337751	872337751	CHG	8.33669e-14	2.00718e-15
breeding	191841	PA_chr05	3481999	PA_chr05:872337778-872337778	872337778	CHG	7.70671e-19	1.80866e-22
breeding	191841	PA_chr05	3481999	PA_chr05:872337791-872337791	872337791	CHG	2.63536e-19	1.53204e-22
breeding	191841	PA_chr05	3481999	PA_chr05:872337805-872337805	872337805	CHG	7.5963e-17	2.68659e-20
breeding	191841	PA_chr05	3481999	PA_chr05:872337910-872337910	872337910	CHG	6.56766e-16	4.33998e-19
breeding	191841	PA_chr05	3481999	PA_chr05:872337953-872337953	872337953	CHG	5.75631e-15	5.0718e-18
breeding	188930	PA_chr05	3482079	PA_chr05:781596768-781596768	781596768	CHG	2.0312e-19	2.40527e-28
breeding	188931	PA_chr05	3482096	PA_chr05:781596768-781596768	781596768	CHG	2.16609e-16	1.35459e-21
breeding	188932	PA_chr05	3482098	PA_chr05:781596768-781596768	781596768	CHG	2.16609e-16	1.35459e-21
breeding	209051	PA_chr05_cUL0033	51600	PA_chr05_cUL0033:734801-734801	734801	CHG	6.22043e-14	1.80614e-25
breeding	209032	PA_chr05_cUL0033	51693	PA_chr05_cUL0033:629070-629070	629070	CHG	2.16841e-16	9.19463e-29
breeding	209032	PA_chr05_cUL0033	51693	PA_chr05_cUL0033:629161-629161	629161	CHG	6.92129e-19	2.02197e-32
breeding	209050	PA_chr05_cUL0033	51802	PA_chr05_cUL0033:629070-629070	629070	CHG	9.5391e-16	4.58638e-34
breeding	209050	PA_chr05_cUL0033	51802	PA_chr05_cUL0033:629161-629161	629161	CHG	3.20003e-19	1.30832e-38
breeding	209051	PA_chr05_cUL0033	51806	PA_chr05_cUL0033:629070-629070	629070	CHG	7.73375e-22	3.13745e-46
breeding	209051	PA_chr05_cUL0033	51806	PA_chr05_cUL0033:629078-629078	629078	CHG	1.29484e-14	5.96694e-23
breeding	209051	PA_chr05_cUL0033	51806	PA_chr05_cUL0033:629098-629098	629098	CHG	9.15023e-12	3.632e-18
breeding	209051	PA_chr05_cUL0033	51806	PA_chr05_cUL0033:629161-629161	629161	CHG	2.14426e-26	7.36976e-57
breeding	209051	PA_chr05_cUL0033	51806	PA_chr05_cUL0033:629170-629170	629170	CHG	1.95477e-11	1.01678e-12
breeding	209052	PA_chr05_cUL0033	51823	PA_chr05_cUL0033:629161-629161	629161	CHG	8.78693e-12	3.23338e-15
breeding	210232	PA_chr06	571432	PA_chr06:9697012-9697012	9697012	CHG	5.44136e-11	8.02301e-19
breeding	231760	PA_chr06	571432	PA_chr06:814388026-814388026	814388026	CHG	1.12896e-16	3.10569e-28
breeding	210233	PA_chr06	571469	PA_chr06:9697012-9697012	9697012	CHG	7.74502e-11	2.21016e-15
breeding	236290	PA_chr06	571469	PA_chr06:997919289-997919289	997919289	CHG	9.01351e-16	3.4496e-28
breeding	235168	PA_chr06	612593	PA_chr06:946686121-946686121	946686121	CHG	4.0618e-16	7.19037e-32
breeding	220569	PA_chr06	612722	PA_chr06:455687241-455687241	455687241	CHG	2.0981e-17	6.52293e-20
breeding	211074	PA_chr06	612731	PA_chr06:68265649-68265649	68265649	CHG	1.38824e-24	9.8526e-38
breeding	215979	PA_chr06	612731	PA_chr06:292275632-292275632	292275632	CHG	5.34243e-12	8.0604e-20
breeding	215979	PA_chr06	612731	PA_chr06:292275660-292275660	292275660	CHG	5.33977e-12	4.14221e-22
breeding	215979	PA_chr06	612731	PA_chr06:292275683-292275683	292275683	CHG	1.45654e-11	3.95668e-18
breeding	215979	PA_chr06	612731	PA_chr06:292275715-292275715	292275715	CHG	3.15277e-13	8.71299e-21
breeding	213245	PA_chr06	819471	PA_chr06:167278753-167278753	167278753	CHG	8.29234e-16	1.3331e-28
breeding	219303	PA_chr06	819471	PA_chr06:420077697-420077697	420077697	CHG	7.44157e-13	2.26899e-23
breeding	233716	PA_chr06	819471	PA_chr06:888829596-888829596	888829596	CHG	2.08684e-25	4.96833e-39
breeding	233716	PA_chr06	819471	PA_chr06:888829610-888829610	888829610	CHG	1.17132e-21	6.47398e-29
breeding	233716	PA_chr06	819471	PA_chr06:888829673-888829673	888829673	CHG	1.36927e-25	7.9476e-38
breeding	237308	PA_chr06	819471	PA_chr06:1023218325-1023218325	1023218325	CHG	6.47124e-14	9.16018e-28
breeding	210119	PA_chr06	819581	PA_chr06:4048364-4048364	4048364	CHG	5.33596e-12	8.61368e-14
breeding	210239	PA_chr06	819581	PA_chr06:9697012-9697012	9697012	CHG	7.49769e-25	2.43125e-43
breeding	210240	PA_chr06	1042915	PA_chr06:9697012-9697012	9697012	CHG	1.46317e-25	7.67765e-45
breeding	211077	PA_chr06	1042915	PA_chr06:68265649-68265649	68265649	CHG	7.42345e-23	1.59678e-37
breeding	213247	PA_chr06	1042915	PA_chr06:167278720-167278720	167278720	CHG	8.35122e-14	1.56264e-20
breeding	236297	PA_chr06	1042915	PA_chr06:997990703-997990703	997990703	CHG	9.81132e-24	2.18137e-37
breeding	210084	PA_chr06	1042942	PA_chr06:3439177-3439177	3439177	CHG	7.6039e-12	4.84365e-21
breeding	210084	PA_chr06	1042942	PA_chr06:3439659-3439659	3439659	CHG	4.51083e-15	4.42791e-31
breeding	210084	PA_chr06	1042942	PA_chr06:3439685-3439685	3439685	CHG	9.03811e-13	3.59171e-24
breeding	210084	PA_chr06	1042942	PA_chr06:3439690-3439690	3439690	CHG	4.65547e-16	2.61452e-33
breeding	210084	PA_chr06	1042942	PA_chr06:3439722-3439722	3439722	CHG	2.17332e-16	1.38474e-34
breeding	210084	PA_chr06	1042942	PA_chr06:3439749-3439749	3439749	CHG	2.00498e-13	2.10448e-28
breeding	210084	PA_chr06	1042942	PA_chr06:3439776-3439776	3439776	CHG	5.01922e-15	2.72045e-30
breeding	210084	PA_chr06	1042942	PA_chr06:3439809-3439809	3439809	CHG	2.64601e-14	1.02896e-27
breeding	229461	PA_chr06	1042942	PA_chr06:746681115-746681115	746681115	CHG	2.46501e-11	7.99063e-12
breeding	229461	PA_chr06	1042942	PA_chr06:746681124-746681124	746681124	CHG	5.91849e-11	3.83351e-12
breeding	210303	PA_chr06	1702648	PA_chr06:18805967-18805967	18805967	CHG	5.28444e-11	2.75633e-14
breeding	210303	PA_chr06	1702648	PA_chr06:18806030-18806030	18806030	CHG	1.56996e-12	2.70456e-16
breeding	219307	PA_chr06	1702648	PA_chr06:420077697-420077697	420077697	CHG	7.00618e-13	1.53678e-25
breeding	213250	PA_chr06	1702699	PA_chr06:167278753-167278753	167278753	CHG	4.40299e-18	2.66788e-32
breeding	232401	PA_chr06	1702699	PA_chr06:846408567-846408567	846408567	CHG	7.68598e-16	2.36752e-19
breeding	233480	PA_chr06	1702699	PA_chr06:882445245-882445245	882445245	CHG	1.88284e-13	2.75052e-15
breeding	235926	PA_chr06	1702699	PA_chr06:984996902-984996902	984996902	CHG	1.61958e-12	6.62596e-16
breeding	235926	PA_chr06	1702699	PA_chr06:984997169-984997169	984997169	CHG	6.42433e-19	9.94435e-22
breeding	235926	PA_chr06	1702699	PA_chr06:984997186-984997186	984997186	CHG	2.71389e-14	1.37501e-18
breeding	232402	PA_chr06	1702723	PA_chr06:846408567-846408567	846408567	CHG	1.9069e-11	5.74848e-13
breeding	239024	PA_chr06	1702723	PA_chr06:1067939780-1067939780	1067939780	CHG	1.08402e-19	1.99915e-38
breeding	219310	PA_chr06	1702816	PA_chr06:420077697-420077697	420077697	CHG	2.51129e-18	1.0538e-29
breeding	219392	PA_chr06	1702816	PA_chr06:424366778-424366778	424366778	CHG	3.4531e-18	1.4423e-22
breeding	236302	PA_chr06	1702816	PA_chr06:997919289-997919289	997919289	CHG	8.86156e-15	6.3536e-24
breeding	210089	PA_chr06	2135478	PA_chr06:3439722-3439722	3439722	CHG	5.18961e-11	3.53958e-15
breeding	219311	PA_chr06	2135478	PA_chr06:420077705-420077705	420077705	CHG	2.13784e-18	6.87423e-48
breeding	236303	PA_chr06	2135478	PA_chr06:997919289-997919289	997919289	CHG	1.82957e-11	6.87174e-19
breeding	239767	PA_chr06	2135478	PA_chr06:1078343208-1078343208	1078343208	CHG	1.79957e-16	1.59686e-20
breeding	213254	PA_chr06	2135702	PA_chr06:167278720-167278720	167278720	CHG	3.74467e-11	2.40247e-13
breeding	233484	PA_chr06	2135702	PA_chr06:882445245-882445245	882445245	CHG	1.88284e-13	2.75052e-15
breeding	237317	PA_chr06	2135702	PA_chr06:1023218325-1023218325	1023218325	CHG	7.33025e-18	9.89494e-32
breeding	211085	PA_chr06	2135717	PA_chr06:68265649-68265649	68265649	CHG	1.18731e-25	6.19857e-42
breeding	220581	PA_chr06	2135717	PA_chr06:455687241-455687241	455687241	CHG	8.54609e-15	2.48889e-17
breeding	232406	PA_chr06	2135717	PA_chr06:846408567-846408567	846408567	CHG	7.68598e-16	2.0021e-20
breeding	234595	PA_chr06	2135717	PA_chr06:920155979-920155979	920155979	CHG	3.8979e-17	1.00101e-24
breeding	236305	PA_chr06	2135717	PA_chr06:997919289-997919289	997919289	CHG	9.22906e-14	1.11434e-19
breeding	211086	PA_chr06	2135729	PA_chr06:68265649-68265649	68265649	CHG	1.75751e-15	4.78933e-22
breeding	219314	PA_chr06	2135729	PA_chr06:420077775-420077775	420077775	CHG	3.31409e-16	3.19747e-20
breeding	232407	PA_chr06	2135729	PA_chr06:846408567-846408567	846408567	CHG	7.68598e-16	2.0021e-20
breeding	233486	PA_chr06	2135729	PA_chr06:882432911-882432911	882432911	CHG	8.00101e-26	2.12946e-42
breeding	235301	PA_chr06	2135729	PA_chr06:951436680-951436680	951436680	CHG	4.07288e-20	1.18992e-30
breeding	235301	PA_chr06	2135729	PA_chr06:951436689-951436689	951436689	CHG	2.82447e-23	6.87276e-37
breeding	236306	PA_chr06	2135729	PA_chr06:997919289-997919289	997919289	CHG	9.27679e-15	1.42077e-19
breeding	211087	PA_chr06	2135752	PA_chr06:68265649-68265649	68265649	CHG	1.18731e-25	1.96738e-42
breeding	211228	PA_chr06	2135752	PA_chr06:76856663-76856663	76856663	CHG	6.0401e-20	8.01332e-23
breeding	232408	PA_chr06	2135752	PA_chr06:846322467-846322467	846322467	CHG	2.48026e-19	2.31846e-33
breeding	232408	PA_chr06	2135752	PA_chr06:846322541-846322541	846322541	CHG	3.33283e-22	1.5525e-34
breeding	232408	PA_chr06	2135752	PA_chr06:846322556-846322556	846322556	CHG	2.46435e-30	1.57124e-68
breeding	232408	PA_chr06	2135752	PA_chr06:846322597-846322597	846322597	CHG	2.69703e-22	2.88004e-39
breeding	232408	PA_chr06	2135752	PA_chr06:846322607-846322607	846322607	CHG	8.2727e-31	4.79668e-70
breeding	233487	PA_chr06	2135752	PA_chr06:882432911-882432911	882432911	CHG	1.48116e-33	6.21066e-70
breeding	213258	PA_chr06	2135781	PA_chr06:167278753-167278753	167278753	CHG	1.89487e-11	8.77799e-18
breeding	233488	PA_chr06	2135781	PA_chr06:882432911-882432911	882432911	CHG	1.48116e-33	5.56167e-73
breeding	211089	PA_chr06	2135782	PA_chr06:68265649-68265649	68265649	CHG	8.94103e-26	3.0474e-42
breeding	224107	PA_chr06	2135782	PA_chr06:559122680-559122680	559122680	CHG	1.73427e-11	8.46999e-15
breeding	211090	PA_chr06	2418692	PA_chr06:68265649-68265649	68265649	CHG	1.38824e-24	6.15995e-35
breeding	211231	PA_chr06	2418692	PA_chr06:76856688-76856688	76856688	CHG	5.08489e-15	6.18568e-27
breeding	213260	PA_chr06	2418692	PA_chr06:167278753-167278753	167278753	CHG	8.0736e-14	6.95641e-21
breeding	222961	PA_chr06	2418692	PA_chr06:523352829-523352829	523352829	CHG	2.45148e-19	6.72657e-35
breeding	232412	PA_chr06	2419060	PA_chr06:846408567-846408567	846408567	CHG	3.66099e-11	6.58773e-14
breeding	233491	PA_chr06	2419060	PA_chr06:882432911-882432911	882432911	CHG	4.59033e-20	2.36397e-32
breeding	211092	PA_chr06	2961395	PA_chr06:68265649-68265649	68265649	CHG	1.46591e-23	6.13515e-35
breeding	224110	PA_chr06	2961395	PA_chr06:559122680-559122680	559122680	CHG	3.86471e-12	2.5233e-15
breeding	211093	PA_chr06	2961446	PA_chr06:68265649-68265649	68265649	CHG	1.46591e-23	6.13515e-35
breeding	233013	PA_chr06	2961446	PA_chr06:863113522-863113522	863113522	CHG	1.0334e-11	4.68083e-15
breeding	218032	PA_chr06	2961519	PA_chr06:370504432-370504432	370504432	CHG	2.64574e-11	6.61873e-17
breeding	211096	PA_chr06	2961539	PA_chr06:68265649-68265649	68265649	CHG	3.72876e-20	4.74288e-27
breeding	231475	PA_chr06	2961611	PA_chr06:803703200-803703200	803703200	CHG	7.42511e-13	1.02834e-16
breeding	213269	PA_chr06	2961685	PA_chr06:167278753-167278753	167278753	CHG	1.10703e-16	1.94945e-29
breeding	213271	PA_chr06	2961865	PA_chr06:167278753-167278753	167278753	CHG	1.45453e-13	1.00206e-23
breeding	213352	PA_chr06	2961865	PA_chr06:168233350-168233350	168233350	CHG	1.63129e-11	5.31178e-14
breeding	234653	PA_chr06	2969359	PA_chr06:921925050-921925050	921925050	CHG	5.6171e-14	2.42287e-28
breeding	233536	PA_chr06	2969577	PA_chr06:883120242-883120242	883120242	CHG	7.81694e-12	7.86875e-33
breeding	234654	PA_chr06	2969577	PA_chr06:921925050-921925050	921925050	CHG	8.07236e-14	3.88231e-27
breeding	211106	PA_chr06	2969673	PA_chr06:68265649-68265649	68265649	CHG	1.1924e-15	5.91967e-27
breeding	211107	PA_chr06	2969711	PA_chr06:68265649-68265649	68265649	CHG	1.00931e-11	1.36802e-22
breeding	237878	PA_chr06	2969714	PA_chr06:1032258164-1032258164	1032258164	CHG	3.79845e-11	4.38756e-16
breeding	239794	PA_chr06	3394814	PA_chr06:1078343208-1078343208	1078343208	CHG	6.77168e-13	8.00026e-18
breeding	239198	PA_chr06	3394947	PA_chr06:1072144389-1072144389	1072144389	CHG	7.46855e-13	2.63311e-16
breeding	211254	PA_chr06	3394964	PA_chr06:76856751-76856751	76856751	CHG	8.84254e-14	1.28406e-22
breeding	239202	PA_chr06	3409668	PA_chr06:1072144389-1072144389	1072144389	CHG	9.78985e-18	1.6228e-21
breeding	237887	PA_chr06	3409775	PA_chr06:1032258164-1032258164	1032258164	CHG	4.62215e-11	4.56934e-21
breeding	237902	PA_chr06	3439092	PA_chr06:1032258164-1032258164	1032258164	CHG	1.75546e-14	7.28773e-20
breeding	239217	PA_chr06	3439092	PA_chr06:1072144360-1072144360	1072144360	CHG	3.49566e-13	5.51665e-15
breeding	211277	PA_chr06	3439538	PA_chr06:76856688-76856688	76856688	CHG	9.13836e-12	3.50587e-21
breeding	216259	PA_chr06	4048096	PA_chr06:305987633-305987633	305987633	CHG	9.01227e-13	7.96028e-14
breeding	216262	PA_chr06	4048191	PA_chr06:305987633-305987633	305987633	CHG	1.97936e-13	1.85238e-12
breeding	216275	PA_chr06	4048414	PA_chr06:305987633-305987633	305987633	CHG	2.09443e-11	7.82306e-12
breeding	240932	PA_chr06_sUL001	13806380	PA_chr06_sUL001:15329524-15329524	15329524	CHG	6.29622e-11	2.88177e-19
breeding	241001	PA_chr06_sUL003	529233	PA_chr06_sUL003:529234-529234	529234	CHG	2.15555e-16	7.13008e-22
breeding	241001	PA_chr06_sUL003	529233	PA_chr06_sUL003:531332-531332	531332	CHG	1.70424e-25	1.86757e-32
breeding	249053	PA_chr07	415285	PA_chr07:294945675-294945675	294945675	CHG	1.70723e-19	1.21935e-34
breeding	249053	PA_chr07	415285	PA_chr07:294945682-294945682	294945682	CHG	2.34302e-11	2.39137e-20
breeding	249053	PA_chr07	415285	PA_chr07:294945697-294945697	294945697	CHG	6.91101e-16	4.68193e-32
breeding	249053	PA_chr07	415285	PA_chr07:294945720-294945720	294945720	CHG	4.77602e-12	5.92898e-24
breeding	263053	PA_chr07	415285	PA_chr07:849560079-849560079	849560079	CHG	4.79475e-14	6.4243e-28
breeding	263053	PA_chr07	415285	PA_chr07:849560120-849560120	849560120	CHG	2.17925e-15	1.52412e-31
breeding	277213	PA_chr07	415285	PA_chr07:1407485989-1407485989	1407485989	CHG	9.69044e-19	9.88179e-25
breeding	277117	PA_chr07	415403	PA_chr07:1398695285-1398695285	1398695285	CHG	1.29201e-13	2.29107e-31
breeding	263055	PA_chr07	582720	PA_chr07:849560079-849560079	849560079	CHG	3.1847e-19	1.49334e-34
breeding	263055	PA_chr07	582720	PA_chr07:849560120-849560120	849560120	CHG	1.67002e-21	1.43763e-37
breeding	277139	PA_chr07	582720	PA_chr07:1398987490-1398987490	1398987490	CHG	6.23515e-14	1.80491e-26
breeding	242970	PA_chr07	582729	PA_chr07:71353525-71353525	71353525	CHG	3.00982e-11	1.51193e-23
breeding	242970	PA_chr07	582729	PA_chr07:71353537-71353537	71353537	CHG	5.44317e-14	2.45435e-29
breeding	242970	PA_chr07	582729	PA_chr07:71353574-71353574	71353574	CHG	7.65657e-12	3.32877e-29
breeding	242970	PA_chr07	582729	PA_chr07:71353628-71353628	71353628	CHG	1.03572e-11	1.43294e-23
breeding	242970	PA_chr07	582729	PA_chr07:71353641-71353641	71353641	CHG	1.17913e-12	5.51736e-28
breeding	259880	PA_chr07	582729	PA_chr07:726523473-726523473	726523473	CHG	1.03157e-11	3.29659e-20
breeding	259881	PA_chr07	582778	PA_chr07:726523473-726523473	726523473	CHG	3.84888e-26	5.82996e-54
breeding	263057	PA_chr07	582778	PA_chr07:849560079-849560079	849560079	CHG	2.35875e-23	4.60091e-43
breeding	263057	PA_chr07	582778	PA_chr07:849560120-849560120	849560120	CHG	9.18206e-26	2.10948e-50
breeding	242972	PA_chr07	734039	PA_chr07:71353525-71353525	71353525	CHG	1.5602e-18	5.56729e-34
breeding	242972	PA_chr07	734039	PA_chr07:71353537-71353537	71353537	CHG	5.62377e-20	2.89016e-40
breeding	242972	PA_chr07	734039	PA_chr07:71353574-71353574	71353574	CHG	1.33147e-19	5.54502e-40
breeding	242972	PA_chr07	734039	PA_chr07:71353577-71353577	71353577	CHG	2.82893e-17	3.07844e-32
breeding	242972	PA_chr07	734039	PA_chr07:71353628-71353628	71353628	CHG	3.02013e-15	3.43987e-28
breeding	242972	PA_chr07	734039	PA_chr07:71353641-71353641	71353641	CHG	2.11462e-16	1.75921e-33
breeding	255880	PA_chr07	734039	PA_chr07:596312787-596312787	596312787	CHG	1.80674e-12	5.99468e-18
breeding	260132	PA_chr07	734039	PA_chr07:737932117-737932117	737932117	CHG	4.21258e-21	2.58669e-48
breeding	261152	PA_chr07	734039	PA_chr07:774275397-774275397	774275397	CHG	6.77261e-17	2.40436e-15
breeding	261152	PA_chr07	734039	PA_chr07:774275451-774275451	774275451	CHG	1.08924e-18	2.01487e-16
breeding	261152	PA_chr07	734039	PA_chr07:774275462-774275462	774275462	CHG	3.32175e-24	6.12265e-25
breeding	261152	PA_chr07	734039	PA_chr07:774275490-774275490	774275490	CHG	5.19678e-22	4.29587e-21
breeding	261152	PA_chr07	734039	PA_chr07:774275521-774275521	774275521	CHG	4.5963e-21	8.76169e-21
breeding	261152	PA_chr07	734039	PA_chr07:774275528-774275528	774275528	CHG	8.60181e-19	1.70085e-17
breeding	261152	PA_chr07	734039	PA_chr07:774275585-774275585	774275585	CHG	1.50659e-22	1.10883e-22
breeding	261152	PA_chr07	734039	PA_chr07:774275626-774275626	774275626	CHG	1.04646e-21	2.15852e-22
breeding	261152	PA_chr07	734039	PA_chr07:774275651-774275651	774275651	CHG	1.07783e-20	3.07634e-22
breeding	261152	PA_chr07	734039	PA_chr07:774275703-774275703	774275703	CHG	2.90683e-19	3.13839e-25
breeding	261152	PA_chr07	734039	PA_chr07:774275715-774275715	774275715	CHG	7.01672e-20	8.28912e-25
breeding	263058	PA_chr07	734039	PA_chr07:849560079-849560079	849560079	CHG	1.34691e-15	7.65232e-35
breeding	263058	PA_chr07	734039	PA_chr07:849560120-849560120	849560120	CHG	1.74534e-18	6.06694e-41
breeding	255881	PA_chr07	734073	PA_chr07:596312787-596312787	596312787	CHG	1.90523e-12	9.06253e-18
breeding	263059	PA_chr07	734073	PA_chr07:849560079-849560079	849560079	CHG	1.7428e-13	1.00053e-30
breeding	263059	PA_chr07	734073	PA_chr07:849560120-849560120	849560120	CHG	1.00338e-15	2.1522e-34
breeding	267486	PA_chr07	734073	PA_chr07:998150963-998150963	998150963	CHG	4.4996e-12	4.45001e-34
breeding	245746	PA_chr07	734177	PA_chr07:178960719-178960719	178960719	CHG	7.85399e-14	5.40063e-19
breeding	260134	PA_chr07	734177	PA_chr07:737932302-737932302	737932302	CHG	1.18529e-25	5.36222e-50
breeding	263060	PA_chr07	734177	PA_chr07:849560079-849560079	849560079	CHG	8.28998e-17	8.21601e-36
breeding	263060	PA_chr07	734177	PA_chr07:849560120-849560120	849560120	CHG	1.23005e-19	1.71531e-41
breeding	267487	PA_chr07	734177	PA_chr07:998150963-998150963	998150963	CHG	3.38001e-15	1.48879e-35
breeding	276230	PA_chr07	734177	PA_chr07:1347643453-1347643453	1347643453	CHG	7.77094e-23	7.8817e-47
breeding	242975	PA_chr07	734322	PA_chr07:71353525-71353525	71353525	CHG	2.14678e-21	5.23375e-36
breeding	242975	PA_chr07	734322	PA_chr07:71353537-71353537	71353537	CHG	6.62366e-24	4.76317e-44
breeding	242975	PA_chr07	734322	PA_chr07:71353574-71353574	71353574	CHG	4.39577e-23	6.08495e-44
breeding	242975	PA_chr07	734322	PA_chr07:71353577-71353577	71353577	CHG	3.27245e-20	3.24206e-36
breeding	242975	PA_chr07	734322	PA_chr07:71353628-71353628	71353628	CHG	6.64067e-19	4.45238e-32
breeding	242975	PA_chr07	734322	PA_chr07:71353641-71353641	71353641	CHG	3.0768e-21	2.53665e-38
breeding	245427	PA_chr07	734322	PA_chr07:167553001-167553001	167553001	CHG	3.97022e-16	1.57169e-40
breeding	245427	PA_chr07	734322	PA_chr07:167553054-167553054	167553054	CHG	2.1196e-15	9.65203e-37
breeding	245427	PA_chr07	734322	PA_chr07:167553073-167553073	167553073	CHG	2.01312e-19	2.85528e-48
breeding	245427	PA_chr07	734322	PA_chr07:167553120-167553120	167553120	CHG	1.23661e-14	4.34871e-33
breeding	245427	PA_chr07	734322	PA_chr07:167553154-167553154	167553154	CHG	9.41421e-14	3.62923e-29
breeding	245427	PA_chr07	734322	PA_chr07:167553175-167553175	167553175	CHG	5.54354e-11	5.02496e-19
breeding	245427	PA_chr07	734322	PA_chr07:167553190-167553190	167553190	CHG	2.07913e-12	6.52972e-25
breeding	258377	PA_chr07	734322	PA_chr07:686384068-686384068	686384068	CHG	4.6674e-11	4.76379e-12
breeding	261058	PA_chr07	734322	PA_chr07:770694496-770694496	770694496	CHG	7.15631e-12	1.00425e-13
breeding	257837	PA_chr07	1611992	PA_chr07:659203355-659203355	659203355	CHG	8.83661e-19	3.72135e-35
breeding	258379	PA_chr07	2083032	PA_chr07:686383848-686383848	686383848	CHG	2.20233e-14	7.51785e-24
breeding	258379	PA_chr07	2083032	PA_chr07:686383878-686383878	686383878	CHG	7.40095e-18	1.10608e-32
breeding	258379	PA_chr07	2083032	PA_chr07:686383915-686383915	686383915	CHG	8.18128e-17	4.81822e-27
breeding	258379	PA_chr07	2083032	PA_chr07:686383955-686383955	686383955	CHG	1.03922e-15	2.86787e-25
breeding	268166	PA_chr07	2083032	PA_chr07:1023965509-1023965509	1023965509	CHG	2.10376e-13	1.28268e-22
breeding	272777	PA_chr07	2083032	PA_chr07:1185272141-1185272141	1185272141	CHG	4.21238e-12	6.56367e-20
breeding	272777	PA_chr07	2083032	PA_chr07:1185272154-1185272154	1185272154	CHG	5.17755e-17	5.00446e-29
breeding	272777	PA_chr07	2083032	PA_chr07:1185272181-1185272181	1185272181	CHG	6.95287e-16	1.67559e-25
breeding	272777	PA_chr07	2083032	PA_chr07:1185272190-1185272190	1185272190	CHG	1.53536e-16	1.63936e-28
breeding	272777	PA_chr07	2083032	PA_chr07:1185272198-1185272198	1185272198	CHG	6.36599e-13	3.23948e-23
breeding	272777	PA_chr07	2083032	PA_chr07:1185272253-1185272253	1185272253	CHG	8.79788e-16	5.19438e-28
breeding	272777	PA_chr07	2083032	PA_chr07:1185272256-1185272256	1185272256	CHG	3.34216e-14	8.59059e-27
breeding	272777	PA_chr07	2083032	PA_chr07:1185272298-1185272298	1185272298	CHG	3.21321e-13	3.28738e-25
breeding	242978	PA_chr07	2083038	PA_chr07:71353525-71353525	71353525	CHG	4.93908e-19	4.16514e-29
breeding	242978	PA_chr07	2083038	PA_chr07:71353537-71353537	71353537	CHG	1.94127e-15	5.81889e-20
breeding	242978	PA_chr07	2083038	PA_chr07:71353574-71353574	71353574	CHG	1.00823e-12	4.18169e-15
breeding	242978	PA_chr07	2083038	PA_chr07:71353577-71353577	71353577	CHG	2.96366e-11	7.56988e-16
breeding	245750	PA_chr07	2083038	PA_chr07:178960719-178960719	178960719	CHG	3.31483e-16	4.77615e-25
breeding	255886	PA_chr07	2083038	PA_chr07:596312787-596312787	596312787	CHG	2.40074e-24	1.6028e-47
breeding	273305	PA_chr07	2083038	PA_chr07:1210997905-1210997905	1210997905	CHG	1.36916e-14	1.38158e-18
breeding	242979	PA_chr07	2083049	PA_chr07:71353525-71353525	71353525	CHG	2.14678e-21	5.23375e-36
breeding	242979	PA_chr07	2083049	PA_chr07:71353537-71353537	71353537	CHG	6.62366e-24	4.76317e-44
breeding	242979	PA_chr07	2083049	PA_chr07:71353574-71353574	71353574	CHG	4.39577e-23	6.08495e-44
breeding	242979	PA_chr07	2083049	PA_chr07:71353577-71353577	71353577	CHG	3.27245e-20	3.24206e-36
breeding	242979	PA_chr07	2083049	PA_chr07:71353628-71353628	71353628	CHG	6.64067e-19	4.45238e-32
breeding	242979	PA_chr07	2083049	PA_chr07:71353641-71353641	71353641	CHG	3.0768e-21	2.53665e-38
breeding	245751	PA_chr07	2083049	PA_chr07:178960719-178960719	178960719	CHG	5.52216e-21	2.3651e-38
breeding	263065	PA_chr07	2083049	PA_chr07:849560079-849560079	849560079	CHG	1.61121e-11	1.80134e-23
breeding	263065	PA_chr07	2083049	PA_chr07:849560120-849560120	849560120	CHG	6.69968e-13	4.97768e-25
breeding	272779	PA_chr07	2083049	PA_chr07:1185272141-1185272141	1185272141	CHG	6.40298e-14	2.62566e-21
breeding	272779	PA_chr07	2083049	PA_chr07:1185272154-1185272154	1185272154	CHG	7.75087e-17	1.11508e-28
breeding	272779	PA_chr07	2083049	PA_chr07:1185272181-1185272181	1185272181	CHG	8.74135e-16	5.57853e-27
breeding	272779	PA_chr07	2083049	PA_chr07:1185272190-1185272190	1185272190	CHG	2.1842e-16	5.48423e-31
breeding	272779	PA_chr07	2083049	PA_chr07:1185272198-1185272198	1185272198	CHG	1.14096e-12	2.74554e-26
breeding	272779	PA_chr07	2083049	PA_chr07:1185272253-1185272253	1185272253	CHG	1.11242e-15	3.18438e-30
breeding	272779	PA_chr07	2083049	PA_chr07:1185272256-1185272256	1185272256	CHG	5.3613e-14	2.4675e-28
breeding	272779	PA_chr07	2083049	PA_chr07:1185272298-1185272298	1185272298	CHG	4.23765e-13	3.77057e-26
breeding	242980	PA_chr07	2083050	PA_chr07:71353525-71353525	71353525	CHG	2.14678e-21	5.23375e-36
breeding	242980	PA_chr07	2083050	PA_chr07:71353537-71353537	71353537	CHG	6.62366e-24	4.76317e-44
breeding	242980	PA_chr07	2083050	PA_chr07:71353574-71353574	71353574	CHG	4.39577e-23	6.08495e-44
breeding	242980	PA_chr07	2083050	PA_chr07:71353577-71353577	71353577	CHG	3.27245e-20	3.24206e-36
breeding	242980	PA_chr07	2083050	PA_chr07:71353628-71353628	71353628	CHG	6.64067e-19	4.45238e-32
breeding	242980	PA_chr07	2083050	PA_chr07:71353641-71353641	71353641	CHG	3.0768e-21	2.53665e-38
breeding	257006	PA_chr07	2083050	PA_chr07:631840901-631840901	631840901	CHG	6.69444e-19	1.91194e-28
breeding	257007	PA_chr07	2218853	PA_chr07:631840901-631840901	631840901	CHG	2.65424e-16	4.38093e-22
breeding	277366	PA_chr07	2218853	PA_chr07:1413589617-1413589617	1413589617	CHG	7.87891e-11	2.38128e-19
breeding	245754	PA_chr07	2219021	PA_chr07:178960719-178960719	178960719	CHG	4.55649e-18	1.14161e-34
breeding	267495	PA_chr07	2219021	PA_chr07:998150963-998150963	998150963	CHG	9.39985e-23	1.61993e-47
breeding	277367	PA_chr07	2219021	PA_chr07:1413589617-1413589617	1413589617	CHG	3.42866e-11	1.5335e-22
breeding	242983	PA_chr07	2219048	PA_chr07:71353525-71353525	71353525	CHG	2.14678e-21	3.15321e-36
breeding	242983	PA_chr07	2219048	PA_chr07:71353537-71353537	71353537	CHG	6.62366e-24	1.04877e-45
breeding	242983	PA_chr07	2219048	PA_chr07:71353574-71353574	71353574	CHG	4.39577e-23	2.4044e-45
breeding	242983	PA_chr07	2219048	PA_chr07:71353577-71353577	71353577	CHG	3.27245e-20	9.84235e-34
breeding	242983	PA_chr07	2219048	PA_chr07:71353628-71353628	71353628	CHG	6.64067e-19	7.70847e-33
breeding	242983	PA_chr07	2219048	PA_chr07:71353641-71353641	71353641	CHG	3.0768e-21	2.95671e-39
breeding	265651	PA_chr07	2219048	PA_chr07:949491417-949491417	949491417	CHG	8.84545e-17	2.09508e-23
breeding	267496	PA_chr07	2219048	PA_chr07:998150963-998150963	998150963	CHG	9.39985e-23	1.57839e-48
breeding	265652	PA_chr07	2219083	PA_chr07:949491417-949491417	949491417	CHG	6.03394e-13	2.15598e-17
breeding	272784	PA_chr07	2219083	PA_chr07:1185272141-1185272141	1185272141	CHG	2.54764e-13	1.2767e-18
breeding	272784	PA_chr07	2219083	PA_chr07:1185272154-1185272154	1185272154	CHG	7.94022e-20	1.25022e-29
breeding	272784	PA_chr07	2219083	PA_chr07:1185272181-1185272181	1185272181	CHG	1.84428e-18	3.82955e-27
breeding	272784	PA_chr07	2219083	PA_chr07:1185272190-1185272190	1185272190	CHG	1.57652e-20	5.11331e-30
breeding	272784	PA_chr07	2219083	PA_chr07:1185272198-1185272198	1185272198	CHG	9.37323e-17	3.1738e-24
breeding	272784	PA_chr07	2219083	PA_chr07:1185272253-1185272253	1185272253	CHG	7.28672e-20	3.83806e-29
breeding	272784	PA_chr07	2219083	PA_chr07:1185272256-1185272256	1185272256	CHG	4.36407e-18	3.05467e-27
breeding	272784	PA_chr07	2219083	PA_chr07:1185272298-1185272298	1185272298	CHG	1.38528e-16	9.63329e-26
breeding	242985	PA_chr07	2640848	PA_chr07:71353525-71353525	71353525	CHG	5.60988e-14	1.09412e-24
breeding	272785	PA_chr07	2640848	PA_chr07:1185272141-1185272141	1185272141	CHG	2.54764e-13	1.2767e-18
breeding	272785	PA_chr07	2640848	PA_chr07:1185272154-1185272154	1185272154	CHG	7.94022e-20	1.25022e-29
breeding	272785	PA_chr07	2640848	PA_chr07:1185272181-1185272181	1185272181	CHG	1.84428e-18	3.82955e-27
breeding	272785	PA_chr07	2640848	PA_chr07:1185272190-1185272190	1185272190	CHG	1.57652e-20	5.11331e-30
breeding	272785	PA_chr07	2640848	PA_chr07:1185272198-1185272198	1185272198	CHG	9.37323e-17	3.1738e-24
breeding	272785	PA_chr07	2640848	PA_chr07:1185272253-1185272253	1185272253	CHG	7.28672e-20	3.83806e-29
breeding	272785	PA_chr07	2640848	PA_chr07:1185272256-1185272256	1185272256	CHG	4.36407e-18	3.05467e-27
breeding	272785	PA_chr07	2640848	PA_chr07:1185272298-1185272298	1185272298	CHG	1.38528e-16	9.63329e-26
breeding	242986	PA_chr07	2641017	PA_chr07:71353525-71353525	71353525	CHG	5.60988e-14	1.09412e-24
breeding	263073	PA_chr07	2641017	PA_chr07:849560079-849560079	849560079	CHG	9.81164e-27	3.15455e-48
breeding	263073	PA_chr07	2641017	PA_chr07:849560120-849560120	849560120	CHG	1.90201e-28	2.7748e-55
breeding	272786	PA_chr07	2641017	PA_chr07:1185272141-1185272141	1185272141	CHG	8.22616e-15	1.00812e-23
breeding	272786	PA_chr07	2641017	PA_chr07:1185272154-1185272154	1185272154	CHG	1.46864e-21	2.80941e-36
breeding	272786	PA_chr07	2641017	PA_chr07:1185272181-1185272181	1185272181	CHG	5.2165e-20	2.68943e-33
breeding	272786	PA_chr07	2641017	PA_chr07:1185272190-1185272190	1185272190	CHG	3.09098e-22	3.25348e-38
breeding	272786	PA_chr07	2641017	PA_chr07:1185272198-1185272198	1185272198	CHG	1.95267e-18	1.0554e-30
breeding	272786	PA_chr07	2641017	PA_chr07:1185272253-1185272253	1185272253	CHG	1.19171e-21	2.45832e-37
breeding	272786	PA_chr07	2641017	PA_chr07:1185272256-1185272256	1185272256	CHG	9.64532e-20	4.74295e-34
breeding	272786	PA_chr07	2641017	PA_chr07:1185272298-1185272298	1185272298	CHG	5.94948e-18	1.1374e-30
breeding	276667	PA_chr07	2641017	PA_chr07:1374268707-1374268707	1374268707	CHG	1.45545e-12	3.14786e-21
breeding	277371	PA_chr07	2641017	PA_chr07:1413589617-1413589617	1413589617	CHG	9.24395e-11	1.61886e-21
breeding	263074	PA_chr07	3353915	PA_chr07:849560079-849560079	849560079	CHG	3.08662e-26	1.5717e-50
breeding	263074	PA_chr07	3353915	PA_chr07:849560120-849560120	849560120	CHG	5.71807e-28	7.48054e-57
breeding	267192	PA_chr07	3353915	PA_chr07:987388645-987388645	987388645	CHG	1.89168e-14	3.80368e-19
breeding	267192	PA_chr07	3353915	PA_chr07:987417400-987417400	987417400	CHG	2.08476e-15	2.6447e-27
breeding	245760	PA_chr07	3353990	PA_chr07:178960719-178960719	178960719	CHG	7.67383e-11	1.03014e-16
breeding	268111	PA_chr07	3353990	PA_chr07:1021884555-1021884555	1021884555	CHG	8.27743e-14	1.08784e-13
breeding	263076	PA_chr07	3354005	PA_chr07:849560079-849560079	849560079	CHG	6.60917e-11	1.07975e-19
breeding	263076	PA_chr07	3354005	PA_chr07:849560120-849560120	849560120	CHG	8.3866e-11	8.52833e-19
breeding	268112	PA_chr07	3354005	PA_chr07:1021884555-1021884555	1021884555	CHG	2.18818e-13	8.5749e-14
breeding	265658	PA_chr07	3354880	PA_chr07:949491417-949491417	949491417	CHG	8.84545e-17	9.26308e-22
breeding	249419	PA_chr07	3371435	PA_chr07:305046693-305046693	305046693	CHG	1.62831e-18	1.637e-19
breeding	249419	PA_chr07	3371435	PA_chr07:305046707-305046707	305046707	CHG	3.8979e-17	3.08521e-27
breeding	249419	PA_chr07	3371435	PA_chr07:305046720-305046720	305046720	CHG	4.28249e-15	9.2263e-24
breeding	249419	PA_chr07	3371435	PA_chr07:305046764-305046764	305046764	CHG	3.10257e-11	4.23097e-15
breeding	249419	PA_chr07	3371435	PA_chr07:305046822-305046822	305046822	CHG	9.41814e-14	8.1112e-17
breeding	249419	PA_chr07	3371435	PA_chr07:305046846-305046846	305046846	CHG	2.67666e-12	6.82432e-20
breeding	272793	PA_chr07	3371464	PA_chr07:1185272141-1185272141	1185272141	CHG	8.22616e-15	1.00812e-23
breeding	272793	PA_chr07	3371464	PA_chr07:1185272154-1185272154	1185272154	CHG	1.46864e-21	2.80941e-36
breeding	272793	PA_chr07	3371464	PA_chr07:1185272181-1185272181	1185272181	CHG	5.2165e-20	2.68943e-33
breeding	272793	PA_chr07	3371464	PA_chr07:1185272190-1185272190	1185272190	CHG	3.09098e-22	3.25348e-38
breeding	272793	PA_chr07	3371464	PA_chr07:1185272198-1185272198	1185272198	CHG	1.95267e-18	1.0554e-30
breeding	272793	PA_chr07	3371464	PA_chr07:1185272253-1185272253	1185272253	CHG	1.19171e-21	2.45832e-37
breeding	272793	PA_chr07	3371464	PA_chr07:1185272256-1185272256	1185272256	CHG	9.64532e-20	4.74295e-34
breeding	272793	PA_chr07	3371464	PA_chr07:1185272298-1185272298	1185272298	CHG	5.94948e-18	1.1374e-30
breeding	258399	PA_chr07	3371729	PA_chr07:686383848-686383848	686383848	CHG	1.75179e-15	5.43923e-24
breeding	258399	PA_chr07	3371729	PA_chr07:686383878-686383878	686383878	CHG	1.33347e-18	6.36668e-32
breeding	258399	PA_chr07	3371729	PA_chr07:686383915-686383915	686383915	CHG	2.52839e-18	3.88261e-29
breeding	258399	PA_chr07	3371729	PA_chr07:686383955-686383955	686383955	CHG	7.60587e-17	2.28499e-27
breeding	246784	PA_chr07	3870903	PA_chr07:220054291-220054291	220054291	CHG	1.72302e-14	7.48506e-27
breeding	245770	PA_chr07	3870969	PA_chr07:178960719-178960719	178960719	CHG	1.75219e-13	7.77173e-29
breeding	262327	PA_chr07	3870969	PA_chr07:819080626-819080626	819080626	CHG	3.1028e-17	2.04787e-15
breeding	265666	PA_chr07	3870969	PA_chr07:949491417-949491417	949491417	CHG	1.88844e-12	1.42426e-20
breeding	246020	PA_chr07	3871186	PA_chr07:183473779-183473779	183473779	CHG	4.53225e-12	2.26112e-19
breeding	250595	PA_chr07	3871333	PA_chr07:367529006-367529006	367529006	CHG	3.43125e-13	1.99374e-17
breeding	250595	PA_chr07	3871333	PA_chr07:367529057-367529057	367529057	CHG	7.39263e-14	3.12775e-20
breeding	250595	PA_chr07	3871333	PA_chr07:367529126-367529126	367529126	CHG	4.08212e-11	2.95187e-14
breeding	255916	PA_chr07	3871348	PA_chr07:596312787-596312787	596312787	CHG	9.17509e-15	3.07413e-30
breeding	276822	PA_chr07	3871348	PA_chr07:1383391815-1383391815	1383391815	CHG	6.99745e-11	1.08405e-14
breeding	250598	PA_chr07	3871351	PA_chr07:367529006-367529006	367529006	CHG	3.89504e-15	3.15543e-17
breeding	250598	PA_chr07	3871351	PA_chr07:367529057-367529057	367529057	CHG	3.44836e-15	1.22223e-19
breeding	250598	PA_chr07	3871351	PA_chr07:367529126-367529126	367529126	CHG	7.77068e-12	3.06426e-14
breeding	257035	PA_chr07	3871351	PA_chr07:631835956-631835956	631835956	CHG	9.91923e-11	7.54799e-19
breeding	256601	PA_chr07	3871412	PA_chr07:615059005-615059005	615059005	CHG	1.74179e-15	3.38553e-13
breeding	255920	PA_chr07	3871433	PA_chr07:596312787-596312787	596312787	CHG	1.2118e-25	2.85016e-45
breeding	255928	PA_chr07	5743062	PA_chr07:596312787-596312787	596312787	CHG	2.43747e-23	6.24623e-39
breeding	250611	PA_chr07	6413974	PA_chr07:367528955-367528955	367528955	CHG	1.70386e-11	6.14852e-14
breeding	250611	PA_chr07	6413974	PA_chr07:367529006-367529006	367529006	CHG	3.03228e-19	2.49455e-26
breeding	250611	PA_chr07	6413974	PA_chr07:367529057-367529057	367529057	CHG	9.4431e-22	2.34483e-32
breeding	250611	PA_chr07	6413974	PA_chr07:367529126-367529126	367529126	CHG	3.245e-13	8.65128e-18
breeding	250611	PA_chr07	6413974	PA_chr07:367529142-367529142	367529142	CHG	1.19969e-11	1.36018e-13
breeding	250617	PA_chr07	6414201	PA_chr07:367529006-367529006	367529006	CHG	7.34109e-15	5.20083e-19
breeding	250617	PA_chr07	6414201	PA_chr07:367529057-367529057	367529057	CHG	7.71748e-15	2.63667e-19
breeding	250618	PA_chr07	6414294	PA_chr07:367529006-367529006	367529006	CHG	1.96536e-15	1.14803e-19
breeding	250618	PA_chr07	6414294	PA_chr07:367529057-367529057	367529057	CHG	1.53461e-16	6.91855e-22
breeding	250619	PA_chr07	6414312	PA_chr07:367528955-367528955	367528955	CHG	1.70386e-11	6.14852e-14
breeding	250619	PA_chr07	6414312	PA_chr07:367529006-367529006	367529006	CHG	3.03228e-19	2.49455e-26
breeding	250619	PA_chr07	6414312	PA_chr07:367529057-367529057	367529057	CHG	9.4431e-22	2.34483e-32
breeding	250619	PA_chr07	6414312	PA_chr07:367529126-367529126	367529126	CHG	3.245e-13	8.65128e-18
breeding	250619	PA_chr07	6414312	PA_chr07:367529142-367529142	367529142	CHG	1.19969e-11	1.36018e-13
breeding	250621	PA_chr07	6414369	PA_chr07:367529006-367529006	367529006	CHG	2.30282e-18	9.5608e-25
breeding	250621	PA_chr07	6414369	PA_chr07:367529057-367529057	367529057	CHG	1.42872e-21	6.6938e-32
breeding	250621	PA_chr07	6414369	PA_chr07:367529126-367529126	367529126	CHG	3.5325e-13	1.04769e-17
breeding	250621	PA_chr07	6414369	PA_chr07:367529142-367529142	367529142	CHG	3.0222e-11	5.12692e-13
breeding	250623	PA_chr07	6414425	PA_chr07:367529006-367529006	367529006	CHG	1.65424e-14	1.73156e-18
breeding	250623	PA_chr07	6414425	PA_chr07:367529057-367529057	367529057	CHG	2.64435e-16	6.25589e-22
breeding	250624	PA_chr07	6493161	PA_chr07:367528955-367528955	367528955	CHG	5.20987e-11	2.67306e-13
breeding	250624	PA_chr07	6493161	PA_chr07:367529006-367529006	367529006	CHG	1.32814e-18	3.33003e-25
breeding	250624	PA_chr07	6493161	PA_chr07:367529057-367529057	367529057	CHG	3.28956e-21	3.4612e-31
breeding	250624	PA_chr07	6493161	PA_chr07:367529126-367529126	367529126	CHG	2.25229e-13	5.27222e-18
breeding	250624	PA_chr07	6493161	PA_chr07:367529142-367529142	367529142	CHG	1.1724e-11	1.50103e-13
breeding	255946	PA_chr07	6493463	PA_chr07:596312787-596312787	596312787	CHG	3.40031e-18	1.35964e-29
breeding	250628	PA_chr07	6493482	PA_chr07:367529006-367529006	367529006	CHG	8.64825e-11	1.93123e-13
breeding	250628	PA_chr07	6493482	PA_chr07:367529057-367529057	367529057	CHG	2.19751e-13	6.88903e-18
breeding	255948	PA_chr07	7538532	PA_chr07:596312787-596312787	596312787	CHG	2.42714e-25	4.13134e-45
breeding	250631	PA_chr07	7538581	PA_chr07:367529057-367529057	367529057	CHG	9.20952e-12	2.98131e-13
breeding	250634	PA_chr07	7710229	PA_chr07:367529057-367529057	367529057	CHG	9.20952e-12	2.98131e-13
breeding	250639	PA_chr07	8455106	PA_chr07:367529112-367529112	367529112	CHG	1.60646e-14	9.4827e-20
breeding	250641	PA_chr07	8455201	PA_chr07:367529006-367529006	367529006	CHG	9.59488e-19	1.0512e-23
breeding	250641	PA_chr07	8455201	PA_chr07:367529057-367529057	367529057	CHG	2.5825e-19	9.39907e-26
breeding	255970	PA_chr07	8962875	PA_chr07:596312787-596312787	596312787	CHG	2.27694e-11	4.85519e-21
breeding	255988	PA_chr07	9006185	PA_chr07:596312787-596312787	596312787	CHG	1.66754e-13	3.67144e-21
breeding	256006	PA_chr07	10088750	PA_chr07:596312787-596312787	596312787	CHG	1.29751e-18	3.70365e-36
breeding	279038	PA_chr07_sUL006	138504	PA_chr07_sUL006:4473546-4473546	4473546	CHG	2.0883e-18	1.88077e-24
breeding	285429	PA_chr08	64677	PA_chr08:233412662-233412662	233412662	CHG	4.17522e-15	1.98143e-25
breeding	285429	PA_chr08	64677	PA_chr08:233412665-233412665	233412665	CHG	2.41835e-16	2.95427e-29
breeding	285429	PA_chr08	64677	PA_chr08:233412704-233412704	233412704	CHG	2.95644e-18	2.60999e-35
breeding	285429	PA_chr08	64677	PA_chr08:233412723-233412723	233412723	CHG	1.32561e-18	6.55262e-36
breeding	285429	PA_chr08	64677	PA_chr08:233412786-233412786	233412786	CHG	1.14593e-17	8.92969e-36
breeding	285429	PA_chr08	64677	PA_chr08:233412792-233412792	233412792	CHG	2.33277e-18	4.87817e-36
breeding	285429	PA_chr08	64677	PA_chr08:233412798-233412798	233412798	CHG	1.04846e-19	5.26342e-41
breeding	285429	PA_chr08	64677	PA_chr08:233412814-233412814	233412814	CHG	1.96582e-15	1.95579e-32
breeding	285429	PA_chr08	64677	PA_chr08:233412830-233412830	233412830	CHG	3.68711e-19	4.75557e-41
breeding	309647	PA_chr08	64677	PA_chr08:1075931163-1075931163	1075931163	CHG	1.2046e-17	5.84154e-14
breeding	279567	PA_chr08	64681	PA_chr08:15092089-15092089	15092089	CHG	2.26627e-15	1.45119e-36
breeding	279567	PA_chr08	64681	PA_chr08:15092112-15092112	15092112	CHG	4.23408e-16	6.18775e-37
breeding	279567	PA_chr08	64681	PA_chr08:15092131-15092131	15092131	CHG	1.46118e-12	2.47089e-28
breeding	279567	PA_chr08	64681	PA_chr08:15092228-15092228	15092228	CHG	1.3285e-14	3.19957e-34
breeding	281422	PA_chr08	64681	PA_chr08:100830835-100830835	100830835	CHG	1.4161e-18	6.89158e-36
breeding	283741	PA_chr08	64681	PA_chr08:184205619-184205619	184205619	CHG	2.08996e-14	1.49965e-23
breeding	283741	PA_chr08	64681	PA_chr08:184205730-184205730	184205730	CHG	3.20683e-11	1.04432e-20
breeding	284765	PA_chr08	64681	PA_chr08:213065839-213065839	213065839	CHG	5.09909e-17	3.66097e-31
breeding	295307	PA_chr08	64683	PA_chr08:562686064-562686064	562686064	CHG	2.23624e-34	5.37482e-71
breeding	299860	PA_chr08	64683	PA_chr08:729494189-729494189	729494189	CHG	8.3031e-11	6.79402e-19
breeding	282101	PA_chr08	64762	PA_chr08:124121453-124121453	124121453	CHG	4.75793e-18	8.60514e-26
breeding	282101	PA_chr08	64762	PA_chr08:124121518-124121518	124121518	CHG	1.54009e-15	6.33e-23
breeding	282101	PA_chr08	64762	PA_chr08:124121526-124121526	124121526	CHG	3.85608e-20	8.29631e-33
breeding	282101	PA_chr08	64762	PA_chr08:124121537-124121537	124121537	CHG	6.9303e-20	9.50238e-32
breeding	282101	PA_chr08	64762	PA_chr08:124121548-124121548	124121548	CHG	7.46822e-21	9.72277e-35
breeding	282101	PA_chr08	64762	PA_chr08:124121568-124121568	124121568	CHG	5.62377e-20	9.8595e-34
breeding	282101	PA_chr08	64762	PA_chr08:124121576-124121576	124121576	CHG	1.38686e-20	5.24135e-37
breeding	282101	PA_chr08	64762	PA_chr08:124121587-124121587	124121587	CHG	2.49419e-17	9.2582e-29
breeding	282101	PA_chr08	64762	PA_chr08:124121611-124121611	124121611	CHG	2.22838e-21	1.29133e-36
breeding	282101	PA_chr08	64762	PA_chr08:124121628-124121628	124121628	CHG	3.0768e-21	1.43763e-37
breeding	282101	PA_chr08	64762	PA_chr08:124121633-124121633	124121633	CHG	8.89571e-21	1.60932e-36
breeding	282101	PA_chr08	64762	PA_chr08:124121661-124121661	124121661	CHG	1.49836e-20	9.74381e-37
breeding	282101	PA_chr08	64762	PA_chr08:124121679-124121679	124121679	CHG	3.22595e-12	9.59855e-21
breeding	284767	PA_chr08	64762	PA_chr08:213065839-213065839	213065839	CHG	2.89516e-25	1.30713e-48
breeding	289760	PA_chr08	64762	PA_chr08:406699270-406699270	406699270	CHG	5.41991e-19	1.37087e-20
breeding	293504	PA_chr08	64762	PA_chr08:505443245-505443245	505443245	CHG	1.31762e-26	1.94016e-36
breeding	293504	PA_chr08	64762	PA_chr08:505443279-505443279	505443279	CHG	1.28146e-18	1.55906e-25
breeding	293504	PA_chr08	64762	PA_chr08:505443322-505443322	505443322	CHG	8.69087e-26	1.42666e-34
breeding	293504	PA_chr08	64762	PA_chr08:505537700-505537700	505537700	CHG	2.5349e-15	1.40971e-22
breeding	294848	PA_chr08	64762	PA_chr08:553915263-553915263	553915263	CHG	5.14361e-12	2.95516e-35
breeding	294848	PA_chr08	64762	PA_chr08:553915289-553915289	553915289	CHG	1.73824e-13	2.1029e-34
breeding	299861	PA_chr08	64762	PA_chr08:729494127-729494127	729494127	CHG	4.32415e-12	9.23383e-14
breeding	299861	PA_chr08	64762	PA_chr08:729494189-729494189	729494189	CHG	2.98009e-14	1.02466e-20
breeding	279543	PA_chr08	64784	PA_chr08:12872435-12872435	12872435	CHG	5.50885e-11	1.61972e-15
breeding	279543	PA_chr08	64784	PA_chr08:12872461-12872461	12872461	CHG	1.57159e-11	2.24742e-19
breeding	279543	PA_chr08	64784	PA_chr08:12872493-12872493	12872493	CHG	1.12514e-12	1.4727e-21
breeding	279543	PA_chr08	64784	PA_chr08:12872502-12872502	12872502	CHG	1.34773e-12	4.27936e-21
breeding	287609	PA_chr08	64784	PA_chr08:325375485-325375485	325375485	CHG	2.03718e-12	6.90168e-12
breeding	290447	PA_chr08	64784	PA_chr08:429409394-429409394	429409394	CHG	2.0103e-24	4.14714e-23
breeding	296053	PA_chr08	64784	PA_chr08:587572476-587572476	587572476	CHG	2.37728e-14	1.24236e-16
breeding	296246	PA_chr08	64784	PA_chr08:590436826-590436826	590436826	CHG	5.09006e-17	3.42526e-29
breeding	296246	PA_chr08	64784	PA_chr08:590436848-590436848	590436848	CHG	7.74543e-17	2.33938e-30
breeding	296246	PA_chr08	64784	PA_chr08:590436854-590436854	590436854	CHG	1.63608e-15	5.5844e-28
breeding	296246	PA_chr08	64784	PA_chr08:590436908-590436908	590436908	CHG	9.0427e-17	4.90788e-30
breeding	296246	PA_chr08	64784	PA_chr08:590436911-590436911	590436911	CHG	3.5162e-14	1.42631e-25
breeding	296246	PA_chr08	64784	PA_chr08:590436926-590436926	590436926	CHG	4.61664e-16	2.1673e-28
breeding	296246	PA_chr08	64784	PA_chr08:590436931-590436931	590436931	CHG	2.15607e-16	1.02204e-27
breeding	296246	PA_chr08	64784	PA_chr08:590436944-590436944	590436944	CHG	1.20515e-14	5.6852e-24
breeding	296246	PA_chr08	64784	PA_chr08:590436955-590436955	590436955	CHG	2.01279e-14	3.12096e-25
breeding	296246	PA_chr08	64784	PA_chr08:590436984-590436984	590436984	CHG	5.48722e-15	1.43964e-25
breeding	296246	PA_chr08	64784	PA_chr08:590437002-590437002	590437002	CHG	2.98492e-16	2.33729e-29
breeding	296246	PA_chr08	64784	PA_chr08:590437038-590437038	590437038	CHG	3.35501e-13	7.90548e-24
breeding	296246	PA_chr08	64784	PA_chr08:590437081-590437081	590437081	CHG	4.14079e-12	1.68103e-22
breeding	299211	PA_chr08	64784	PA_chr08:709109620-709109620	709109620	CHG	1.67002e-21	1.8505e-43
breeding	304520	PA_chr08	64784	PA_chr08:885267704-885267704	885267704	CHG	1.61924e-13	5.51335e-17
breeding	285434	PA_chr08	64824	PA_chr08:233412662-233412662	233412662	CHG	5.49952e-22	6.03474e-33
breeding	285434	PA_chr08	64824	PA_chr08:233412665-233412665	233412665	CHG	8.18284e-22	1.76286e-37
breeding	285434	PA_chr08	64824	PA_chr08:233412704-233412704	233412704	CHG	4.89266e-25	4.34921e-43
breeding	285434	PA_chr08	64824	PA_chr08:233412723-233412723	233412723	CHG	7.12392e-23	2.16499e-37
breeding	285434	PA_chr08	64824	PA_chr08:233412786-233412786	233412786	CHG	1.04719e-25	4.83237e-46
breeding	285434	PA_chr08	64824	PA_chr08:233412792-233412792	233412792	CHG	1.09294e-24	2.99466e-42
breeding	285434	PA_chr08	64824	PA_chr08:233412798-233412798	233412798	CHG	1.13108e-26	8.84519e-49
breeding	285434	PA_chr08	64824	PA_chr08:233412814-233412814	233412814	CHG	1.01417e-21	3.04713e-31
breeding	285434	PA_chr08	64824	PA_chr08:233412830-233412830	233412830	CHG	1.12241e-26	1.6028e-47
breeding	296054	PA_chr08	64824	PA_chr08:587572476-587572476	587572476	CHG	7.54726e-14	2.52994e-16
breeding	308543	PA_chr08	64824	PA_chr08:1047481978-1047481978	1047481978	CHG	4.44526e-13	1.41267e-14
breeding	285435	PA_chr08	64854	PA_chr08:233412761-233412761	233412761	CHG	9.81131e-26	2.89031e-51
breeding	296055	PA_chr08	64854	PA_chr08:587572476-587572476	587572476	CHG	1.50473e-13	2.62555e-15
breeding	296248	PA_chr08	64854	PA_chr08:590436826-590436826	590436826	CHG	8.18703e-20	7.56216e-36
breeding	296248	PA_chr08	64854	PA_chr08:590436848-590436848	590436848	CHG	9.72261e-20	2.40846e-37
breeding	296248	PA_chr08	64854	PA_chr08:590436854-590436854	590436854	CHG	1.4806e-18	1.0056e-34
breeding	296248	PA_chr08	64854	PA_chr08:590436908-590436908	590436908	CHG	1.16729e-18	1.07582e-34
breeding	296248	PA_chr08	64854	PA_chr08:590436911-590436911	590436911	CHG	9.5202e-17	4.15046e-31
breeding	296248	PA_chr08	64854	PA_chr08:590436926-590436926	590436926	CHG	1.04169e-18	2.97387e-34
breeding	296248	PA_chr08	64854	PA_chr08:590436931-590436931	590436931	CHG	4.36407e-18	3.29048e-31
breeding	296248	PA_chr08	64854	PA_chr08:590436944-590436944	590436944	CHG	1.60327e-16	4.28314e-28
breeding	296248	PA_chr08	64854	PA_chr08:590436955-590436955	590436955	CHG	9.98349e-16	4.1385e-28
breeding	296248	PA_chr08	64854	PA_chr08:590436984-590436984	590436984	CHG	2.2816e-16	4.36358e-29
breeding	296248	PA_chr08	64854	PA_chr08:590437002-590437002	590437002	CHG	4.36276e-18	2.91291e-34
breeding	296248	PA_chr08	64854	PA_chr08:590437014-590437014	590437014	CHG	9.78821e-12	1.99206e-18
breeding	296248	PA_chr08	64854	PA_chr08:590437038-590437038	590437038	CHG	4.66395e-15	2.33868e-27
breeding	296248	PA_chr08	64854	PA_chr08:590437081-590437081	590437081	CHG	2.20229e-14	5.90381e-27
breeding	314293	PA_chr08	64854	PA_chr08:1232239329-1232239329	1232239329	CHG	9.14799e-15	6.85848e-22
breeding	285436	PA_chr08	64893	PA_chr08:233412662-233412662	233412662	CHG	1.57259e-16	3.4912e-27
breeding	285436	PA_chr08	64893	PA_chr08:233412665-233412665	233412665	CHG	1.46722e-17	1.24367e-30
breeding	285436	PA_chr08	64893	PA_chr08:233412704-233412704	233412704	CHG	1.04846e-19	1.60773e-38
breeding	285436	PA_chr08	64893	PA_chr08:233412723-233412723	233412723	CHG	5.83394e-18	1.23818e-34
breeding	285436	PA_chr08	64893	PA_chr08:233412786-233412786	233412786	CHG	2.61535e-19	4.05076e-34
breeding	285436	PA_chr08	64893	PA_chr08:233412792-233412792	233412792	CHG	3.04122e-18	1.89195e-32
breeding	285436	PA_chr08	64893	PA_chr08:233412798-233412798	233412798	CHG	1.72003e-20	5.50235e-38
breeding	285436	PA_chr08	64893	PA_chr08:233412814-233412814	233412814	CHG	4.36497e-17	9.92547e-25
breeding	285436	PA_chr08	64893	PA_chr08:233412830-233412830	233412830	CHG	2.94886e-20	4.8762e-38
breeding	293804	PA_chr08	64893	PA_chr08:508678979-508678979	508678979	CHG	5.60223e-25	1.98102e-49
breeding	295312	PA_chr08	64893	PA_chr08:562686064-562686064	562686064	CHG	2.86417e-23	2.9718e-43
breeding	296056	PA_chr08	64893	PA_chr08:587572476-587572476	587572476	CHG	1.50473e-13	1.21378e-15
breeding	308545	PA_chr08	64893	PA_chr08:1047482120-1047482120	1047482120	CHG	9.24395e-11	2.42207e-11
breeding	289765	PA_chr08	64897	PA_chr08:406699270-406699270	406699270	CHG	3.05756e-13	2.93934e-15
breeding	293509	PA_chr08	64897	PA_chr08:505443245-505443245	505443245	CHG	1.53577e-17	9.24555e-24
breeding	293509	PA_chr08	64897	PA_chr08:505443279-505443279	505443279	CHG	7.05656e-13	1.8623e-16
breeding	293509	PA_chr08	64897	PA_chr08:505443322-505443322	505443322	CHG	6.06236e-17	9.12087e-20
breeding	293509	PA_chr08	64897	PA_chr08:505537700-505537700	505537700	CHG	1.17839e-11	7.68063e-16
breeding	295926	PA_chr08	64897	PA_chr08:584998462-584998462	584998462	CHG	3.5835e-13	8.69781e-16
breeding	301779	PA_chr08	64897	PA_chr08:772166492-772166492	772166492	CHG	4.03498e-13	6.95414e-25
breeding	304524	PA_chr08	64897	PA_chr08:885267704-885267704	885267704	CHG	9.05236e-14	3.53592e-13
breeding	306084	PA_chr08	64897	PA_chr08:935943756-935943756	935943756	CHG	1.572e-11	1.1564e-13
breeding	308546	PA_chr08	64897	PA_chr08:1047482120-1047482120	1047482120	CHG	9.24395e-11	2.42207e-11
breeding	285438	PA_chr08	64942	PA_chr08:233412662-233412662	233412662	CHG	8.91727e-12	4.27032e-16
breeding	285438	PA_chr08	64942	PA_chr08:233412704-233412704	233412704	CHG	6.33303e-12	7.65421e-21
breeding	285438	PA_chr08	64942	PA_chr08:233412723-233412723	233412723	CHG	7.41322e-12	4.99106e-22
breeding	285438	PA_chr08	64942	PA_chr08:233412786-233412786	233412786	CHG	8.6103e-14	4.99106e-22
breeding	285438	PA_chr08	64942	PA_chr08:233412792-233412792	233412792	CHG	1.32641e-13	2.05961e-22
breeding	285438	PA_chr08	64942	PA_chr08:233412798-233412798	233412798	CHG	6.12456e-14	8.81321e-25
breeding	285438	PA_chr08	64942	PA_chr08:233412830-233412830	233412830	CHG	1.8018e-12	2.51786e-23
breeding	296251	PA_chr08	64942	PA_chr08:590436826-590436826	590436826	CHG	1.24165e-13	1.05735e-33
breeding	296251	PA_chr08	64942	PA_chr08:590436848-590436848	590436848	CHG	6.08054e-14	6.52859e-36
breeding	296251	PA_chr08	64942	PA_chr08:590436854-590436854	590436854	CHG	6.91141e-13	7.43215e-34
breeding	296251	PA_chr08	64942	PA_chr08:590436908-590436908	590436908	CHG	3.96913e-15	3.08511e-36
breeding	296251	PA_chr08	64942	PA_chr08:590436911-590436911	590436911	CHG	6.0155e-12	4.92606e-32
breeding	296251	PA_chr08	64942	PA_chr08:590436926-590436926	590436926	CHG	8.82709e-15	9.78397e-35
breeding	296251	PA_chr08	64942	PA_chr08:590436931-590436931	590436931	CHG	4.23691e-13	3.65901e-32
breeding	296251	PA_chr08	64942	PA_chr08:590437002-590437002	590437002	CHG	5.04953e-12	4.74097e-31
breeding	296251	PA_chr08	64942	PA_chr08:590437038-590437038	590437038	CHG	5.02052e-11	8.86166e-25
breeding	299278	PA_chr08	64942	PA_chr08:715001050-715001050	715001050	CHG	8.66817e-13	3.8299e-24
breeding	312168	PA_chr08	64942	PA_chr08:1136774350-1136774350	1136774350	CHG	2.07271e-14	1.09265e-49
breeding	299279	PA_chr08	64943	PA_chr08:715001050-715001050	715001050	CHG	6.44914e-18	2.24826e-39
breeding	312596	PA_chr08	64943	PA_chr08:1147924448-1147924448	1147924448	CHG	3.66872e-14	2.82202e-24
breeding	298541	PA_chr08	64951	PA_chr08:682275181-682275181	682275181	CHG	8.26666e-17	1.48036e-23
breeding	306087	PA_chr08	64951	PA_chr08:935943756-935943756	935943756	CHG	2.27996e-19	6.36801e-28
breeding	281433	PA_chr08	64964	PA_chr08:100830835-100830835	100830835	CHG	5.84058e-23	4.01483e-46
breeding	312171	PA_chr08	64964	PA_chr08:1136774350-1136774350	1136774350	CHG	1.331e-13	1.98413e-37
breeding	296062	PA_chr08	64978	PA_chr08:587572476-587572476	587572476	CHG	5.94955e-18	7.33206e-27
breeding	298732	PA_chr08	64978	PA_chr08:686235256-686235256	686235256	CHG	2.91178e-16	1.23776e-20
breeding	298732	PA_chr08	64978	PA_chr08:686235412-686235412	686235412	CHG	1.26939e-14	5.86229e-18
breeding	300909	PA_chr08	64978	PA_chr08:754265671-754265671	754265671	CHG	8.39044e-11	6.38235e-14
breeding	312599	PA_chr08	64978	PA_chr08:1147924522-1147924522	1147924522	CHG	5.2998e-16	3.10569e-28
breeding	296063	PA_chr08	65062	PA_chr08:587572476-587572476	587572476	CHG	3.04176e-14	3.15945e-18
breeding	308337	PA_chr08	65062	PA_chr08:1037377049-1037377049	1037377049	CHG	3.97191e-18	3.30861e-34
breeding	312600	PA_chr08	65062	PA_chr08:1147924448-1147924448	1147924448	CHG	2.3494e-21	2.62326e-31
breeding	296064	PA_chr08	65087	PA_chr08:587572476-587572476	587572476	CHG	1.35133e-11	1.13168e-14
breeding	303218	PA_chr08	65087	PA_chr08:830335499-830335499	830335499	CHG	6.37679e-16	1.24941e-22
breeding	282218	PA_chr08	65089	PA_chr08:133215829-133215829	133215829	CHG	2.85502e-13	3.03667e-24
breeding	296065	PA_chr08	65089	PA_chr08:587572476-587572476	587572476	CHG	4.84253e-19	5.12695e-27
breeding	298735	PA_chr08	65089	PA_chr08:686235256-686235256	686235256	CHG	9.62361e-13	6.37054e-24
breeding	298735	PA_chr08	65089	PA_chr08:686235412-686235412	686235412	CHG	1.50156e-13	4.96256e-23
breeding	317992	PA_chr08	65089	PA_chr08:1355434350-1355434350	1355434350	CHG	4.2991e-13	9.87886e-34
breeding	317992	PA_chr08	65089	PA_chr08:1355434363-1355434363	1355434363	CHG	2.37512e-11	5.52901e-28
breeding	317992	PA_chr08	65089	PA_chr08:1355434408-1355434408	1355434408	CHG	7.06702e-11	2.3614e-26
breeding	317992	PA_chr08	65089	PA_chr08:1355434439-1355434439	1355434439	CHG	2.86616e-12	1.22615e-33
breeding	317992	PA_chr08	65089	PA_chr08:1355434500-1355434500	1355434500	CHG	1.70991e-11	9.44813e-32
breeding	317992	PA_chr08	65089	PA_chr08:1355434503-1355434503	1355434503	CHG	1.74491e-11	5.44195e-31
breeding	317992	PA_chr08	65089	PA_chr08:1355434508-1355434508	1355434508	CHG	4.53818e-12	2.64393e-34
breeding	317992	PA_chr08	65089	PA_chr08:1355434534-1355434534	1355434534	CHG	8.14961e-11	1.1779e-32
breeding	317992	PA_chr08	65089	PA_chr08:1355434569-1355434569	1355434569	CHG	5.07736e-11	2.25692e-35
breeding	317992	PA_chr08	65089	PA_chr08:1355434578-1355434578	1355434578	CHG	5.52807e-12	1.81439e-33
breeding	317992	PA_chr08	65089	PA_chr08:1355434612-1355434612	1355434612	CHG	7.17051e-12	1.52491e-33
breeding	281438	PA_chr08	65158	PA_chr08:100830835-100830835	100830835	CHG	5.22982e-26	7.24003e-53
breeding	312603	PA_chr08	65158	PA_chr08:1147924522-1147924522	1147924522	CHG	1.41893e-12	5.58436e-27
breeding	301721	PA_chr08	65164	PA_chr08:771715585-771715585	771715585	CHG	1.41433e-17	5.02277e-36
breeding	317994	PA_chr08	65164	PA_chr08:1355434350-1355434350	1355434350	CHG	2.91626e-11	5.33144e-24
breeding	317994	PA_chr08	65164	PA_chr08:1355434500-1355434500	1355434500	CHG	1.31062e-11	8.14978e-24
breeding	317994	PA_chr08	65164	PA_chr08:1355434503-1355434503	1355434503	CHG	1.09977e-11	2.32398e-24
breeding	317994	PA_chr08	65164	PA_chr08:1355434508-1355434508	1355434508	CHG	4.20573e-12	3.84012e-25
breeding	317994	PA_chr08	65164	PA_chr08:1355434534-1355434534	1355434534	CHG	4.97696e-12	6.20362e-25
breeding	317994	PA_chr08	65164	PA_chr08:1355434569-1355434569	1355434569	CHG	1.04902e-12	1.17837e-25
breeding	317994	PA_chr08	65164	PA_chr08:1355434578-1355434578	1355434578	CHG	3.40655e-12	1.68789e-24
breeding	293520	PA_chr08	65181	PA_chr08:505443245-505443245	505443245	CHG	8.14972e-13	1.49782e-12
breeding	299290	PA_chr08	65181	PA_chr08:715001050-715001050	715001050	CHG	2.37578e-11	4.86721e-18
breeding	301747	PA_chr08	65181	PA_chr08:771818502-771818502	771818502	CHG	2.27241e-12	4.68176e-14
breeding	281441	PA_chr08	65191	PA_chr08:100831038-100831038	100831038	CHG	3.97191e-18	1.02528e-36
breeding	296069	PA_chr08	65191	PA_chr08:587572476-587572476	587572476	CHG	4.70662e-11	1.4547e-19
breeding	297086	PA_chr08	65191	PA_chr08:635485240-635485240	635485240	CHG	3.44162e-22	4.87919e-40
breeding	297086	PA_chr08	65191	PA_chr08:635485297-635485297	635485297	CHG	1.11976e-22	6.87276e-37
breeding	297086	PA_chr08	65191	PA_chr08:635485351-635485351	635485351	CHG	1.53461e-16	1.46695e-21
breeding	281442	PA_chr08	65239	PA_chr08:100830835-100830835	100830835	CHG	3.16283e-16	3.68392e-33
breeding	297088	PA_chr08	65263	PA_chr08:635485240-635485240	635485240	CHG	1.85823e-21	1.11248e-40
breeding	297088	PA_chr08	65263	PA_chr08:635485297-635485297	635485297	CHG	8.47175e-20	4.12132e-35
breeding	297088	PA_chr08	65263	PA_chr08:635485351-635485351	635485351	CHG	1.08693e-14	6.19664e-21
breeding	299363	PA_chr08	65263	PA_chr08:715441473-715441473	715441473	CHG	2.61229e-16	5.72314e-36
breeding	299634	PA_chr08	4802426	PA_chr08:721756818-721756818	721756818	CHG	2.68357e-15	1.68378e-25
breeding	298562	PA_chr08	4802497	PA_chr08:682275181-682275181	682275181	CHG	1.79272e-15	1.96264e-26
breeding	305939	PA_chr08	4802520	PA_chr08:930484197-930484197	930484197	CHG	5.86565e-12	3.72636e-12
breeding	312319	PA_chr08	4802729	PA_chr08:1143046024-1143046024	1143046024	CHG	5.89352e-16	5.41085e-12
breeding	312319	PA_chr08	4802729	PA_chr08:1143046079-1143046079	1143046079	CHG	4.90842e-11	3.55261e-11
breeding	312319	PA_chr08	4802729	PA_chr08:1143046129-1143046129	1143046129	CHG	9.95619e-17	6.27879e-16
breeding	312319	PA_chr08	4802729	PA_chr08:1143046356-1143046356	1143046356	CHG	2.40139e-19	7.8072e-34
breeding	312319	PA_chr08	4802729	PA_chr08:1143046360-1143046360	1143046360	CHG	1.18731e-25	2.6457e-44
breeding	312319	PA_chr08	4802729	PA_chr08:1143046409-1143046409	1143046409	CHG	3.58225e-26	3.88048e-52
breeding	312319	PA_chr08	4802729	PA_chr08:1143046450-1143046450	1143046450	CHG	2.04378e-29	7.48491e-64
breeding	312319	PA_chr08	4802729	PA_chr08:1143046463-1143046463	1143046463	CHG	3.67284e-17	1.63431e-26
breeding	312319	PA_chr08	4802729	PA_chr08:1143046471-1143046471	1143046471	CHG	2.02608e-22	3.36036e-35
breeding	312319	PA_chr08	4802729	PA_chr08:1143046549-1143046549	1143046549	CHG	5.28972e-25	5.54265e-39
breeding	298568	PA_chr08	4849115	PA_chr08:682275215-682275215	682275215	CHG	9.69595e-13	1.32341e-14
breeding	294882	PA_chr08	4849124	PA_chr08:553933595-553933595	553933595	CHG	1.90523e-12	4.46353e-15
breeding	281459	PA_chr08	4849132	PA_chr08:100830835-100830835	100830835	CHG	8.6446e-11	1.70624e-17
breeding	302524	PA_chr08	4849132	PA_chr08:815114563-815114563	815114563	CHG	2.25738e-15	1.73129e-21
breeding	302524	PA_chr08	4849132	PA_chr08:815114585-815114585	815114585	CHG	1.15173e-22	8.00193e-30
breeding	302524	PA_chr08	4849132	PA_chr08:815114606-815114606	815114606	CHG	7.76682e-16	7.57207e-19
breeding	302524	PA_chr08	4849132	PA_chr08:815114636-815114636	815114636	CHG	1.77093e-18	1.92558e-25
breeding	302524	PA_chr08	4849132	PA_chr08:815114667-815114667	815114667	CHG	2.44385e-19	2.81916e-28
breeding	302524	PA_chr08	4849132	PA_chr08:815114690-815114690	815114690	CHG	8.14635e-20	1.02022e-26
breeding	302524	PA_chr08	4849132	PA_chr08:815114770-815114770	815114770	CHG	1.54037e-21	8.98184e-23
breeding	280928	PA_chr08	4849142	PA_chr08:75567511-75567511	75567511	CHG	2.64654e-36	9.38794e-114
breeding	299311	PA_chr08	4849158	PA_chr08:715001050-715001050	715001050	CHG	8.82794e-14	8.2672e-25
breeding	293632	PA_chr08	4849169	PA_chr08:506627337-506627337	506627337	CHG	7.69479e-22	2.74564e-31
breeding	299312	PA_chr08	4849169	PA_chr08:715001050-715001050	715001050	CHG	3.95624e-24	3.89768e-46
breeding	299313	PA_chr08	4849177	PA_chr08:715001050-715001050	715001050	CHG	3.87956e-25	1.18101e-47
breeding	299315	PA_chr08	4849187	PA_chr08:715001050-715001050	715001050	CHG	6.6184e-27	2.46583e-54
breeding	299385	PA_chr08	4849187	PA_chr08:715441473-715441473	715441473	CHG	6.91243e-12	2.12503e-25
breeding	299317	PA_chr08	4849219	PA_chr08:715001050-715001050	715001050	CHG	1.44317e-21	6.67128e-32
breeding	299318	PA_chr08	4849231	PA_chr08:715001050-715001050	715001050	CHG	1.95901e-32	3.12818e-72
breeding	293639	PA_chr08	4849277	PA_chr08:506627337-506627337	506627337	CHG	2.01268e-25	1.35747e-37
breeding	299321	PA_chr08	4849287	PA_chr08:715001050-715001050	715001050	CHG	8.15998e-33	4.30903e-69
breeding	284476	PA_chr08	4849289	PA_chr08:202731372-202731372	202731372	CHG	1.29957e-35	2.80103e-13
breeding	280505	PA_chr08	4849310	PA_chr08:59789382-59789382	59789382	CHG	1.3146e-13	6.63456e-22
breeding	299323	PA_chr08	4849310	PA_chr08:715001050-715001050	715001050	CHG	1.88321e-12	1.18232e-12
breeding	314585	PA_chr08	4849316	PA_chr08:1246172515-1246172515	1246172515	CHG	2.27968e-11	3.0974e-18
breeding	314585	PA_chr08	4849316	PA_chr08:1246172533-1246172533	1246172533	CHG	4.85911e-11	2.74251e-18
breeding	314585	PA_chr08	4849316	PA_chr08:1246172549-1246172549	1246172549	CHG	5.63508e-12	1.56397e-15
breeding	314585	PA_chr08	4849316	PA_chr08:1246172592-1246172592	1246172592	CHG	1.08306e-12	1.18648e-25
breeding	314585	PA_chr08	4849316	PA_chr08:1246172664-1246172664	1246172664	CHG	5.36867e-12	6.81829e-26
breeding	314585	PA_chr08	4849316	PA_chr08:1246172681-1246172681	1246172681	CHG	7.37284e-13	6.19496e-25
breeding	314585	PA_chr08	4849316	PA_chr08:1246172685-1246172685	1246172685	CHG	4.3298e-12	1.67506e-24
breeding	280943	PA_chr08	4854437	PA_chr08:75567511-75567511	75567511	CHG	2.64654e-36	9.38794e-114
breeding	291343	PA_chr08	4854520	PA_chr08:455280945-455280945	455280945	CHG	1.88934e-21	2.89602e-31
breeding	299329	PA_chr08	4854558	PA_chr08:715001050-715001050	715001050	CHG	1.38706e-17	2.3593e-22
breeding	280512	PA_chr08	4854597	PA_chr08:59789382-59789382	59789382	CHG	6.22444e-13	1.01525e-17
breeding	281481	PA_chr08	4854602	PA_chr08:100830835-100830835	100830835	CHG	1.30142e-25	9.15967e-44
breeding	281482	PA_chr08	5639369	PA_chr08:100830835-100830835	100830835	CHG	1.8524e-17	1.04712e-32
breeding	280515	PA_chr08	5639383	PA_chr08:59789382-59789382	59789382	CHG	2.80517e-16	1.0501e-24
breeding	281483	PA_chr08	5639383	PA_chr08:100830835-100830835	100830835	CHG	1.33919e-16	2.70283e-31
breeding	280517	PA_chr08	5639526	PA_chr08:59813110-59813110	59813110	CHG	6.7558e-13	6.90272e-17
breeding	322827	PA_chr09	1127678	PA_chr09:81221594-81221594	81221594	CHG	9.55998e-17	7.57582e-27
breeding	353323	PA_chr09	1127678	PA_chr09:1044334321-1044334321	1044334321	CHG	6.01399e-23	3.31577e-55
breeding	349724	PA_chr09	1127686	PA_chr09:933484678-933484678	933484678	CHG	6.78775e-12	5.32604e-24
breeding	350619	PA_chr09	1127686	PA_chr09:952440974-952440974	952440974	CHG	3.53978e-11	9.54141e-27
breeding	322325	PA_chr09	1127872	PA_chr09:55823657-55823657	55823657	CHG	3.36538e-11	6.25978e-15
breeding	333898	PA_chr09	1127872	PA_chr09:402486045-402486045	402486045	CHG	4.85378e-11	1.18743e-18
breeding	329970	PA_chr09	1127987	PA_chr09:265750238-265750238	265750238	CHG	3.35538e-21	2.90955e-31
breeding	329970	PA_chr09	1127987	PA_chr09:265750375-265750375	265750375	CHG	6.68613e-21	4.90591e-34
breeding	321892	PA_chr09	1128268	PA_chr09:31912260-31912260	31912260	CHG	8.47868e-20	5.67843e-29
breeding	351609	PA_chr09	1128268	PA_chr09:990796019-990796019	990796019	CHG	1.35035e-14	2.56438e-31
breeding	329973	PA_chr09	1354896	PA_chr09:265750238-265750238	265750238	CHG	1.3006e-16	2.76668e-19
breeding	329973	PA_chr09	1354896	PA_chr09:265750375-265750375	265750375	CHG	2.29738e-11	1.96911e-11
breeding	329974	PA_chr09	1577150	PA_chr09:265750238-265750238	265750238	CHG	1.1098e-24	1.77987e-39
breeding	329974	PA_chr09	1577150	PA_chr09:265750375-265750375	265750375	CHG	2.25422e-18	1.06788e-21
breeding	348779	PA_chr09	1577150	PA_chr09:895916027-895916027	895916027	CHG	4.04113e-15	1.26355e-21
breeding	322649	PA_chr09	1577398	PA_chr09:69448043-69448043	69448043	CHG	8.3031e-11	5.35242e-15
breeding	354550	PA_chr09	1577398	PA_chr09:1079635500-1079635500	1079635500	CHG	3.84577e-14	9.86324e-16
breeding	354550	PA_chr09	1577398	PA_chr09:1079635510-1079635510	1079635510	CHG	1.93355e-14	2.34132e-16
breeding	354550	PA_chr09	1577398	PA_chr09:1079635522-1079635522	1079635522	CHG	1.74523e-13	5.02596e-15
breeding	354550	PA_chr09	1577398	PA_chr09:1079635531-1079635531	1079635531	CHG	4.86943e-15	7.74638e-17
breeding	354550	PA_chr09	1577398	PA_chr09:1079635564-1079635564	1079635564	CHG	1.27036e-14	3.38703e-16
breeding	354550	PA_chr09	1577398	PA_chr09:1079635619-1079635619	1079635619	CHG	3.57776e-12	4.43668e-13
breeding	354550	PA_chr09	1577398	PA_chr09:1079635624-1079635624	1079635624	CHG	1.58018e-12	8.97106e-14
breeding	354550	PA_chr09	1577398	PA_chr09:1079635627-1079635627	1079635627	CHG	1.0918e-11	6.64272e-14
breeding	354550	PA_chr09	1577398	PA_chr09:1079635640-1079635640	1079635640	CHG	2.17423e-13	6.27802e-15
breeding	334324	PA_chr09	2251412	PA_chr09:420858356-420858356	420858356	CHG	2.25217e-13	4.77528e-24
breeding	353632	PA_chr09	2251412	PA_chr09:1051712561-1051712561	1051712561	CHG	9.92826e-11	1.1553e-12
breeding	328213	PA_chr09	2251473	PA_chr09:217846227-217846227	217846227	CHG	6.89561e-15	3.81255e-21
breeding	328213	PA_chr09	2251473	PA_chr09:217846297-217846297	217846297	CHG	2.71511e-19	1.21946e-29
breeding	336057	PA_chr09	2251473	PA_chr09:470419725-470419725	470419725	CHG	1.1414e-14	1.32367e-21
breeding	336057	PA_chr09	2251473	PA_chr09:470419769-470419769	470419769	CHG	9.91024e-13	1.18719e-16
breeding	336057	PA_chr09	2251473	PA_chr09:470419791-470419791	470419791	CHG	6.09452e-14	5.18025e-20
breeding	336057	PA_chr09	2251473	PA_chr09:470419832-470419832	470419832	CHG	2.10321e-15	1.70589e-21
breeding	336057	PA_chr09	2251473	PA_chr09:470419885-470419885	470419885	CHG	3.34797e-11	2.69255e-14
breeding	346104	PA_chr09	2251473	PA_chr09:824767746-824767746	824767746	CHG	2.3104e-12	6.48464e-23
breeding	328214	PA_chr09	2306305	PA_chr09:217846227-217846227	217846227	CHG	5.28215e-12	4.49164e-16
breeding	328214	PA_chr09	2306305	PA_chr09:217846297-217846297	217846297	CHG	5.51918e-18	1.05191e-27
breeding	329325	PA_chr09	2306305	PA_chr09:249055193-249055193	249055193	CHG	2.57864e-16	3.21548e-24
breeding	328215	PA_chr09	2306332	PA_chr09:217846227-217846227	217846227	CHG	5.42133e-12	2.75575e-16
breeding	328215	PA_chr09	2306332	PA_chr09:217846297-217846297	217846297	CHG	1.27958e-17	6.09842e-27
breeding	343414	PA_chr09	2306332	PA_chr09:749471359-749471359	749471359	CHG	3.05542e-18	1.06013e-33
breeding	343414	PA_chr09	2306332	PA_chr09:749471549-749471549	749471549	CHG	1.48024e-11	4.28084e-16
breeding	353635	PA_chr09	2306332	PA_chr09:1051712561-1051712561	1051712561	CHG	9.25759e-12	2.7935e-14
breeding	321944	PA_chr09	2306349	PA_chr09:32337798-32337798	32337798	CHG	7.33302e-11	1.22557e-11
breeding	341474	PA_chr09	2306349	PA_chr09:649175358-649175358	649175358	CHG	2.24605e-13	3.61373e-17
breeding	341474	PA_chr09	2306349	PA_chr09:649175367-649175367	649175367	CHG	2.33277e-18	6.34287e-22
breeding	341474	PA_chr09	2306349	PA_chr09:649175371-649175371	649175371	CHG	3.53811e-16	2.77935e-21
breeding	343415	PA_chr09	2306349	PA_chr09:749471359-749471359	749471359	CHG	1.05274e-17	6.59492e-32
breeding	343415	PA_chr09	2306349	PA_chr09:749471549-749471549	749471549	CHG	7.9635e-11	2.75515e-15
breeding	321945	PA_chr09	2306366	PA_chr09:32337762-32337762	32337762	CHG	4.33166e-12	2.90863e-15
breeding	341475	PA_chr09	2306366	PA_chr09:649175367-649175367	649175367	CHG	4.20448e-12	4.30592e-13
breeding	343966	PA_chr09	2306366	PA_chr09:758194818-758194818	758194818	CHG	1.22173e-13	6.03751e-18
breeding	343966	PA_chr09	2306366	PA_chr09:758194835-758194835	758194835	CHG	1.98265e-11	3.63684e-15
breeding	333275	PA_chr09	2306444	PA_chr09:383677365-383677365	383677365	CHG	1.13108e-26	2.29312e-70
breeding	333275	PA_chr09	2306444	PA_chr09:383677410-383677410	383677410	CHG	9.30987e-24	9.58787e-62
breeding	333275	PA_chr09	2306444	PA_chr09:383677455-383677455	383677455	CHG	4.82304e-21	3.07421e-47
breeding	333275	PA_chr09	2306444	PA_chr09:383677465-383677465	383677465	CHG	2.2394e-17	2.83627e-40
breeding	333275	PA_chr09	2306444	PA_chr09:383677470-383677470	383677470	CHG	1.68027e-24	1.51765e-51
breeding	333275	PA_chr09	2306444	PA_chr09:383677680-383677680	383677680	CHG	1.55516e-33	5.69795e-149
breeding	341476	PA_chr09	2306444	PA_chr09:649175358-649175358	649175358	CHG	2.24605e-13	3.61373e-17
breeding	341476	PA_chr09	2306444	PA_chr09:649175367-649175367	649175367	CHG	2.33277e-18	6.34287e-22
breeding	341476	PA_chr09	2306444	PA_chr09:649175371-649175371	649175371	CHG	3.53811e-16	2.77935e-21
breeding	345321	PA_chr09	2306444	PA_chr09:791870036-791870036	791870036	CHG	1.10728e-11	5.5454e-16
breeding	328219	PA_chr09	2306487	PA_chr09:217846227-217846227	217846227	CHG	1.83258e-11	1.98005e-16
breeding	328219	PA_chr09	2306487	PA_chr09:217846297-217846297	217846297	CHG	1.48295e-14	1.1691e-21
breeding	349243	PA_chr09	2306487	PA_chr09:911145778-911145778	911145778	CHG	9.90536e-13	7.28822e-12
breeding	328220	PA_chr09	2306488	PA_chr09:217846227-217846227	217846227	CHG	1.00823e-12	2.07165e-18
breeding	328220	PA_chr09	2306488	PA_chr09:217846297-217846297	217846297	CHG	1.42278e-15	1.40349e-23
breeding	330568	PA_chr09	2306488	PA_chr09:286989792-286989792	286989792	CHG	1.77109e-14	1.67333e-20
breeding	328962	PA_chr09	2365936	PA_chr09:238847433-238847433	238847433	CHG	7.81324e-11	1.5932e-16
breeding	321950	PA_chr09	2365951	PA_chr09:32337762-32337762	32337762	CHG	2.18818e-13	5.94465e-16
breeding	321950	PA_chr09	2365951	PA_chr09:32337798-32337798	32337798	CHG	2.24184e-11	3.63884e-14
breeding	330571	PA_chr09	2366101	PA_chr09:286989792-286989792	286989792	CHG	5.49372e-12	5.34397e-13
breeding	345326	PA_chr09	2366101	PA_chr09:791869941-791869941	791869941	CHG	2.87265e-20	9.81666e-32
breeding	321952	PA_chr09	2958795	PA_chr09:32337762-32337762	32337762	CHG	2.18818e-13	5.94465e-16
breeding	321952	PA_chr09	2958795	PA_chr09:32337798-32337798	32337798	CHG	2.24184e-11	3.63884e-14
breeding	333281	PA_chr09	2958795	PA_chr09:383677365-383677365	383677365	CHG	1.13108e-26	2.29312e-70
breeding	333281	PA_chr09	2958795	PA_chr09:383677410-383677410	383677410	CHG	9.30987e-24	9.58787e-62
breeding	333281	PA_chr09	2958795	PA_chr09:383677455-383677455	383677455	CHG	4.82304e-21	3.07421e-47
breeding	333281	PA_chr09	2958795	PA_chr09:383677465-383677465	383677465	CHG	2.2394e-17	2.83627e-40
breeding	333281	PA_chr09	2958795	PA_chr09:383677470-383677470	383677470	CHG	1.68027e-24	1.51765e-51
breeding	333281	PA_chr09	2958795	PA_chr09:383677680-383677680	383677680	CHG	1.55516e-33	5.69795e-149
breeding	346164	PA_chr09	2958801	PA_chr09:827087916-827087916	827087916	CHG	5.60212e-11	1.48576e-15
breeding	333283	PA_chr09	2958848	PA_chr09:383677365-383677365	383677365	CHG	1.13108e-26	2.29312e-70
breeding	333283	PA_chr09	2958848	PA_chr09:383677410-383677410	383677410	CHG	9.30987e-24	9.58787e-62
breeding	333283	PA_chr09	2958848	PA_chr09:383677455-383677455	383677455	CHG	4.82304e-21	3.07421e-47
breeding	333283	PA_chr09	2958848	PA_chr09:383677465-383677465	383677465	CHG	2.2394e-17	2.83627e-40
breeding	333283	PA_chr09	2958848	PA_chr09:383677470-383677470	383677470	CHG	1.68027e-24	1.51765e-51
breeding	333283	PA_chr09	2958848	PA_chr09:383677680-383677680	383677680	CHG	1.55516e-33	5.69795e-149
breeding	344744	PA_chr09	2958848	PA_chr09:778073398-778073398	778073398	CHG	5.01214e-11	2.15904e-14
breeding	344744	PA_chr09	2958848	PA_chr09:778073429-778073429	778073429	CHG	7.33276e-24	2.53818e-39
breeding	344744	PA_chr09	2958848	PA_chr09:778073457-778073457	778073457	CHG	1.90819e-16	8.46118e-31
breeding	344744	PA_chr09	2958848	PA_chr09:778073473-778073473	778073473	CHG	1.23504e-16	1.06486e-32
breeding	344744	PA_chr09	2958848	PA_chr09:778073494-778073494	778073494	CHG	2.33208e-14	5.00177e-19
breeding	345329	PA_chr09	2958848	PA_chr09:791870005-791870005	791870005	CHG	7.42066e-14	6.96323e-18
breeding	351628	PA_chr09	2958848	PA_chr09:990796019-990796019	990796019	CHG	7.6935e-26	5.60729e-50
breeding	356721	PA_chr09	2958848	PA_chr09:1149747642-1149747642	1149747642	CHG	9.3683e-16	1.23463e-20
breeding	330575	PA_chr09	2958896	PA_chr09:286989792-286989792	286989792	CHG	3.14892e-19	4.46283e-27
breeding	348798	PA_chr09	2958896	PA_chr09:895916027-895916027	895916027	CHG	3.79104e-19	2.29054e-27
breeding	351630	PA_chr09	2958948	PA_chr09:990796019-990796019	990796019	CHG	4.14006e-26	1.91505e-50
breeding	356723	PA_chr09	2958948	PA_chr09:1149747642-1149747642	1149747642	CHG	9.3683e-16	1.72851e-20
breeding	321591	PA_chr09	3181704	PA_chr09:17959685-17959685	17959685	CHG	5.35826e-11	5.0298e-14
breeding	321957	PA_chr09	3181704	PA_chr09:32337762-32337762	32337762	CHG	5.03211e-11	2.29493e-13
breeding	333286	PA_chr09	3181704	PA_chr09:383677365-383677365	383677365	CHG	2.56582e-11	3.81131e-64
breeding	333286	PA_chr09	3181704	PA_chr09:383677470-383677470	383677470	CHG	1.28408e-11	4.71373e-48
breeding	333286	PA_chr09	3181704	PA_chr09:383677680-383677680	383677680	CHG	8.38567e-15	5.33544e-115
breeding	356724	PA_chr09	3181704	PA_chr09:1149747642-1149747642	1149747642	CHG	9.3683e-16	1.72851e-20
breeding	351632	PA_chr09	3588027	PA_chr09:990796019-990796019	990796019	CHG	2.83405e-21	4.6773e-31
breeding	333500	PA_chr09	3588120	PA_chr09:387046767-387046767	387046767	CHG	7.42058e-16	3.32758e-25
breeding	333500	PA_chr09	3588120	PA_chr09:387046785-387046785	387046785	CHG	6.63074e-28	2.53765e-52
breeding	333500	PA_chr09	3588120	PA_chr09:387046803-387046803	387046803	CHG	1.71914e-24	1.4392e-36
breeding	333500	PA_chr09	3588120	PA_chr09:387046813-387046813	387046813	CHG	1.73694e-17	6.77725e-26
breeding	347769	PA_chr09	3588120	PA_chr09:875154090-875154090	875154090	CHG	1.11603e-16	1.97259e-11
breeding	347934	PA_chr09	3588229	PA_chr09:877893606-877893606	877893606	CHG	4.61311e-22	1.19269e-39
breeding	347934	PA_chr09	3588229	PA_chr09:877893638-877893638	877893638	CHG	1.11119e-22	1.00764e-40
breeding	347934	PA_chr09	3588229	PA_chr09:877893689-877893689	877893689	CHG	3.20961e-23	8.83648e-45
breeding	347934	PA_chr09	3588229	PA_chr09:877893716-877893716	877893716	CHG	2.28273e-17	7.75465e-25
breeding	347934	PA_chr09	3588229	PA_chr09:877893769-877893769	877893769	CHG	6.82916e-21	4.138e-35
breeding	347934	PA_chr09	3588229	PA_chr09:877893801-877893801	877893801	CHG	1.48685e-18	1.3056e-29
breeding	347934	PA_chr09	3588229	PA_chr09:877893869-877893869	877893869	CHG	1.5055e-20	3.10415e-34
breeding	347934	PA_chr09	3588229	PA_chr09:877893893-877893893	877893893	CHG	1.24344e-20	2.09381e-35
breeding	347934	PA_chr09	3588229	PA_chr09:877893912-877893912	877893912	CHG	1.39127e-14	1.71729e-21
breeding	347934	PA_chr09	3588229	PA_chr09:877893919-877893919	877893919	CHG	6.60104e-25	1.16309e-51
breeding	347934	PA_chr09	3588229	PA_chr09:877893936-877893936	877893936	CHG	1.33071e-17	5.75721e-28
breeding	347934	PA_chr09	3588229	PA_chr09:877893940-877893940	877893940	CHG	8.25202e-18	6.56874e-27
breeding	347934	PA_chr09	3588229	PA_chr09:877893985-877893985	877893985	CHG	5.27931e-22	4.24726e-42
breeding	347934	PA_chr09	3588229	PA_chr09:877894042-877894042	877894042	CHG	3.51935e-22	3.29653e-37
breeding	347934	PA_chr09	3588229	PA_chr09:877894056-877894056	877894056	CHG	1.40076e-22	5.32362e-44
breeding	347934	PA_chr09	3588229	PA_chr09:877894071-877894071	877894071	CHG	1.8454e-11	1.53369e-14
breeding	347934	PA_chr09	3588229	PA_chr09:877894077-877894077	877894077	CHG	8.51455e-15	9.87053e-22
breeding	347934	PA_chr09	3588229	PA_chr09:877894134-877894134	877894134	CHG	9.84453e-16	9.04845e-24
breeding	347934	PA_chr09	3588229	PA_chr09:877894146-877894146	877894146	CHG	1.38212e-21	2.5102e-37
breeding	347934	PA_chr09	3588229	PA_chr09:877894210-877894210	877894210	CHG	7.82849e-16	1.06867e-24
breeding	347934	PA_chr09	3588229	PA_chr09:877894254-877894254	877894254	CHG	4.11803e-22	3.11105e-46
breeding	355414	PA_chr09	3588229	PA_chr09:1106777577-1106777577	1106777577	CHG	1.79872e-13	1.36502e-38
breeding	333291	PA_chr09	3588262	PA_chr09:383677680-383677680	383677680	CHG	8.38567e-15	2.71969e-93
breeding	345337	PA_chr09	3588262	PA_chr09:791870036-791870036	791870036	CHG	1.10728e-11	5.5454e-16
breeding	347935	PA_chr09	3588262	PA_chr09:877893775-877893775	877893775	CHG	8.71813e-23	4.53881e-37
breeding	330585	PA_chr09	3734060	PA_chr09:286989792-286989792	286989792	CHG	8.14712e-17	4.43472e-24
breeding	352048	PA_chr09	3734060	PA_chr09:1010094339-1010094339	1010094339	CHG	5.68473e-14	1.22299e-14
breeding	330586	PA_chr09	3734072	PA_chr09:286989792-286989792	286989792	CHG	1.97701e-12	1.57386e-17
breeding	352049	PA_chr09	3734072	PA_chr09:1010094339-1010094339	1010094339	CHG	3.55213e-14	7.33982e-16
breeding	329355	PA_chr09	4161601	PA_chr09:249055193-249055193	249055193	CHG	1.85876e-12	3.51074e-22
breeding	326666	PA_chr09	4161746	PA_chr09:184808305-184808305	184808305	CHG	2.02538e-14	1.18575e-17
breeding	326666	PA_chr09	4161746	PA_chr09:184808311-184808311	184808311	CHG	4.79016e-21	8.20449e-28
breeding	326666	PA_chr09	4161746	PA_chr09:184808375-184808375	184808375	CHG	7.30656e-25	6.51819e-39
breeding	326666	PA_chr09	4161746	PA_chr09:184808379-184808379	184808379	CHG	4.20171e-25	4.70212e-40
breeding	326666	PA_chr09	4161746	PA_chr09:184808403-184808403	184808403	CHG	9.64024e-19	5.68204e-26
breeding	326666	PA_chr09	4161746	PA_chr09:184808439-184808439	184808439	CHG	6.1849e-14	6.82506e-16
breeding	326666	PA_chr09	4161746	PA_chr09:184808456-184808456	184808456	CHG	5.83995e-14	6.18621e-17
breeding	326666	PA_chr09	4161746	PA_chr09:184808504-184808504	184808504	CHG	5.8968e-21	4.57972e-30
breeding	326666	PA_chr09	4161746	PA_chr09:184808569-184808569	184808569	CHG	1.97972e-21	1.27347e-31
breeding	326666	PA_chr09	4161746	PA_chr09:184808580-184808580	184808580	CHG	4.01686e-23	4.55036e-33
breeding	326666	PA_chr09	4161746	PA_chr09:184808601-184808601	184808601	CHG	5.26166e-23	2.36389e-31
breeding	355427	PA_chr09	4161756	PA_chr09:1106777577-1106777577	1106777577	CHG	7.39337e-19	2.87417e-44
breeding	348828	PA_chr09	4776354	PA_chr09:895916027-895916027	895916027	CHG	7.22019e-12	5.37277e-20
breeding	352073	PA_chr09	4776497	PA_chr09:1010094358-1010094358	1010094358	CHG	1.21714e-14	8.41117e-22
breeding	352073	PA_chr09	4776497	PA_chr09:1010094366-1010094366	1010094366	CHG	5.56205e-12	9.50532e-16
breeding	352073	PA_chr09	4776497	PA_chr09:1010094489-1010094489	1010094489	CHG	2.85426e-16	9.31762e-23
breeding	352073	PA_chr09	4776497	PA_chr09:1010094574-1010094574	1010094574	CHG	9.26218e-14	5.29397e-14
breeding	352073	PA_chr09	4776497	PA_chr09:1010094603-1010094603	1010094603	CHG	3.66722e-13	2.54133e-16
breeding	352073	PA_chr09	4776497	PA_chr09:1010094609-1010094609	1010094609	CHG	3.45435e-11	2.62572e-14
breeding	352077	PA_chr09	4861846	PA_chr09:1010094358-1010094358	1010094358	CHG	6.91028e-14	6.15612e-20
breeding	352077	PA_chr09	4861846	PA_chr09:1010094366-1010094366	1010094366	CHG	6.68243e-12	9.95317e-15
breeding	352077	PA_chr09	4861846	PA_chr09:1010094489-1010094489	1010094489	CHG	4.90061e-15	6.73136e-20
breeding	352077	PA_chr09	4861846	PA_chr09:1010094574-1010094574	1010094574	CHG	2.68166e-14	4.02017e-14
breeding	352077	PA_chr09	4861846	PA_chr09:1010094603-1010094603	1010094603	CHG	3.65723e-13	1.97561e-15
breeding	352077	PA_chr09	4861846	PA_chr09:1010094609-1010094609	1010094609	CHG	7.59909e-11	1.76123e-13
breeding	352080	PA_chr09	4916388	PA_chr09:1010094339-1010094339	1010094339	CHG	6.49714e-16	1.21004e-19
breeding	326693	PA_chr09	5391304	PA_chr09:184808305-184808305	184808305	CHG	1.52149e-11	4.27453e-20
breeding	326693	PA_chr09	5391304	PA_chr09:184808311-184808311	184808311	CHG	7.59683e-16	9.92329e-32
breeding	326693	PA_chr09	5391304	PA_chr09:184808375-184808375	184808375	CHG	1.37221e-20	1.39694e-45
breeding	326693	PA_chr09	5391304	PA_chr09:184808379-184808379	184808379	CHG	4.91273e-21	1.15129e-47
breeding	326693	PA_chr09	5391304	PA_chr09:184808403-184808403	184808403	CHG	2.38932e-15	1.65266e-29
breeding	326693	PA_chr09	5391304	PA_chr09:184808456-184808456	184808456	CHG	4.05938e-11	2.30068e-19
breeding	326693	PA_chr09	5391304	PA_chr09:184808504-184808504	184808504	CHG	6.61998e-17	2.83169e-33
breeding	326693	PA_chr09	5391304	PA_chr09:184808569-184808569	184808569	CHG	2.14652e-17	3.22848e-34
breeding	326693	PA_chr09	5391304	PA_chr09:184808580-184808580	184808580	CHG	9.15616e-18	1.37869e-35
breeding	326693	PA_chr09	5391304	PA_chr09:184808601-184808601	184808601	CHG	1.48204e-17	1.69607e-34
breeding	348845	PA_chr09	5391304	PA_chr09:895916027-895916027	895916027	CHG	1.84677e-17	5.63151e-26
breeding	348847	PA_chr09	5391319	PA_chr09:895916027-895916027	895916027	CHG	1.31861e-18	2.54065e-29
breeding	348850	PA_chr09	5763646	PA_chr09:895916027-895916027	895916027	CHG	1.00982e-17	5.73303e-29
breeding	326862	PA_chr09	16839366	PA_chr09:184808311-184808311	184808311	CHG	7.62589e-13	5.1581e-26
breeding	326862	PA_chr09	16839366	PA_chr09:184808375-184808375	184808375	CHG	2.21743e-15	9.57016e-37
breeding	326862	PA_chr09	16839366	PA_chr09:184808379-184808379	184808379	CHG	1.96359e-15	7.45787e-38
breeding	326862	PA_chr09	16839366	PA_chr09:184808403-184808403	184808403	CHG	7.4264e-12	1.2094e-25
breeding	326862	PA_chr09	16839366	PA_chr09:184808504-184808504	184808504	CHG	1.23158e-13	8.27901e-31
breeding	326862	PA_chr09	16839366	PA_chr09:184808569-184808569	184808569	CHG	2.77982e-13	4.56454e-30
breeding	326862	PA_chr09	16839366	PA_chr09:184808580-184808580	184808580	CHG	2.70534e-14	9.78272e-31
breeding	326862	PA_chr09	16839366	PA_chr09:184808601-184808601	184808601	CHG	8.82121e-15	1.29927e-30
breeding	360971	PA_chr09_cUL0026	1862696	PA_chr09_cUL0026:1878315-1878315	1878315	CHG	1.40387e-11	9.87993e-21
breeding	361220	PA_chr09_cUL0029	760300	PA_chr09_cUL0029:2169466-2169466	2169466	CHG	1.37117e-29	1.20751e-63
breeding	370356	PA_chr10	4008406	PA_chr10:250660711-250660711	250660711	CHG	4.87128e-12	3.68302e-21
breeding	370357	PA_chr10	4008447	PA_chr10:250660711-250660711	250660711	CHG	4.87128e-12	3.68302e-21
breeding	382316	PA_chr10	4008447	PA_chr10:701892183-701892183	701892183	CHG	1.27913e-14	2.04617e-30
breeding	364593	PA_chr10	4008466	PA_chr10:89961281-89961281	89961281	CHG	1.22689e-11	8.18391e-23
breeding	377574	PA_chr10	4008466	PA_chr10:502065442-502065442	502065442	CHG	9.72812e-14	1.32947e-25
breeding	379369	PA_chr10	4008466	PA_chr10:593953191-593953191	593953191	CHG	1.71801e-17	4.34986e-40
breeding	381479	PA_chr10	4008526	PA_chr10:678995995-678995995	678995995	CHG	1.71933e-13	2.09676e-19
breeding	381479	PA_chr10	4008526	PA_chr10:678996021-678996021	678996021	CHG	1.8262e-15	3.92724e-24
breeding	381479	PA_chr10	4008526	PA_chr10:678996025-678996025	678996025	CHG	5.85797e-12	5.82684e-19
breeding	381479	PA_chr10	4008526	PA_chr10:678996112-678996112	678996112	CHG	2.01164e-11	6.08437e-20
breeding	381479	PA_chr10	4008526	PA_chr10:678996129-678996129	678996129	CHG	9.2229e-15	8.663e-23
breeding	381479	PA_chr10	4008526	PA_chr10:678996184-678996184	678996184	CHG	9.24473e-13	1.88917e-15
breeding	372356	PA_chr10	4008614	PA_chr10:300262700-300262700	300262700	CHG	2.66582e-13	2.22608e-22
breeding	381547	PA_chr10	4008658	PA_chr10:680497966-680497966	680497966	CHG	3.36686e-12	1.44349e-15
breeding	382001	PA_chr10	4008658	PA_chr10:692857789-692857789	692857789	CHG	2.37209e-21	2.01333e-45
breeding	382001	PA_chr10	4008658	PA_chr10:692857804-692857804	692857804	CHG	7.64144e-19	1.6311e-40
breeding	387783	PA_chr10	4008658	PA_chr10:861571720-861571720	861571720	CHG	7.74109e-17	2.10498e-29
breeding	374791	PA_chr10	4008674	PA_chr10:381207926-381207926	381207926	CHG	6.92129e-19	4.06303e-32
breeding	374791	PA_chr10	4008674	PA_chr10:381207949-381207949	381207949	CHG	5.4756e-25	4.36111e-50
breeding	374791	PA_chr10	4008674	PA_chr10:381207955-381207955	381207955	CHG	2.02573e-25	4.0786e-48
breeding	381548	PA_chr10	4008674	PA_chr10:680497966-680497966	680497966	CHG	2.8995e-11	5.34973e-14
breeding	363939	PA_chr10	4008821	PA_chr10:79077212-79077212	79077212	CHG	6.80129e-14	3.30221e-19
breeding	372359	PA_chr10	4008821	PA_chr10:300262700-300262700	300262700	CHG	8.28998e-17	1.03565e-30
breeding	381549	PA_chr10	4008821	PA_chr10:680497966-680497966	680497966	CHG	4.47586e-13	7.66617e-19
breeding	372360	PA_chr10	4598446	PA_chr10:300262700-300262700	300262700	CHG	3.04572e-13	8.11124e-23
breeding	381550	PA_chr10	4598446	PA_chr10:680497966-680497966	680497966	CHG	3.15996e-17	1.65876e-26
breeding	362592	PA_chr10	4598451	PA_chr10:43150187-43150187	43150187	CHG	6.23617e-16	1.2853e-21
breeding	368390	PA_chr10	4598451	PA_chr10:179689317-179689317	179689317	CHG	3.80102e-12	4.17774e-15
breeding	382005	PA_chr10	4598451	PA_chr10:692857789-692857789	692857789	CHG	1.06157e-23	5.48937e-38
breeding	382005	PA_chr10	4598451	PA_chr10:692857804-692857804	692857804	CHG	1.47842e-20	1.68123e-33
breeding	363942	PA_chr10	4598496	PA_chr10:79077241-79077241	79077241	CHG	3.32344e-23	8.68058e-46
breeding	372362	PA_chr10	4598496	PA_chr10:300262700-300262700	300262700	CHG	1.15613e-12	4.21166e-22
breeding	381552	PA_chr10	4598496	PA_chr10:680497966-680497966	680497966	CHG	3.47466e-11	1.60347e-17
breeding	382006	PA_chr10	4598496	PA_chr10:692857789-692857789	692857789	CHG	6.10554e-16	2.9127e-31
breeding	382006	PA_chr10	4598496	PA_chr10:692857804-692857804	692857804	CHG	1.10296e-13	1.02231e-27
breeding	389175	PA_chr10	4598496	PA_chr10:929766663-929766663	929766663	CHG	2.26424e-11	1.52542e-22
breeding	389175	PA_chr10	4598496	PA_chr10:929766677-929766677	929766677	CHG	1.01187e-11	4.94336e-23
breeding	389175	PA_chr10	4598496	PA_chr10:929766707-929766707	929766707	CHG	5.66869e-11	5.14212e-22
breeding	368392	PA_chr10	4598520	PA_chr10:179689317-179689317	179689317	CHG	3.81796e-13	3.7273e-18
breeding	376761	PA_chr10	4598520	PA_chr10:434977680-434977680	434977680	CHG	9.78824e-11	1.10991e-25
breeding	376761	PA_chr10	4598520	PA_chr10:434977686-434977686	434977686	CHG	2.26789e-12	7.35065e-39
breeding	376761	PA_chr10	4598520	PA_chr10:434977816-434977816	434977816	CHG	8.98495e-12	8.6267e-32
breeding	376761	PA_chr10	4598520	PA_chr10:434977826-434977826	434977826	CHG	4.53225e-12	1.99551e-32
breeding	376761	PA_chr10	4598520	PA_chr10:434977922-434977922	434977922	CHG	2.44314e-12	1.07113e-35
breeding	376761	PA_chr10	4598520	PA_chr10:434977935-434977935	434977935	CHG	1.41296e-11	1.07509e-31
breeding	362595	PA_chr10	4598523	PA_chr10:43150257-43150257	43150257	CHG	4.47021e-19	8.16959e-28
breeding	381488	PA_chr10	4598523	PA_chr10:678995995-678995995	678995995	CHG	1.71024e-26	2.73435e-50
breeding	381488	PA_chr10	4598523	PA_chr10:678996021-678996021	678996021	CHG	1.76347e-28	5.30085e-72
breeding	381488	PA_chr10	4598523	PA_chr10:678996025-678996025	678996025	CHG	1.45705e-25	4.06821e-54
breeding	381488	PA_chr10	4598523	PA_chr10:678996079-678996079	678996079	CHG	1.50952e-18	3.47831e-35
breeding	381488	PA_chr10	4598523	PA_chr10:678996098-678996098	678996098	CHG	1.33147e-19	7.44686e-38
breeding	381488	PA_chr10	4598523	PA_chr10:678996112-678996112	678996112	CHG	1.3108e-22	4.97651e-49
breeding	381488	PA_chr10	4598523	PA_chr10:678996123-678996123	678996123	CHG	1.52776e-21	3.16156e-39
breeding	381488	PA_chr10	4598523	PA_chr10:678996129-678996129	678996129	CHG	4.93627e-29	3.81048e-65
breeding	381488	PA_chr10	4598523	PA_chr10:678996184-678996184	678996184	CHG	9.12979e-26	8.77448e-43
breeding	381488	PA_chr10	4598523	PA_chr10:678996457-678996457	678996457	CHG	5.92878e-18	4.6817e-28
breeding	381488	PA_chr10	4598523	PA_chr10:678996509-678996509	678996509	CHG	1.02738e-13	6.41238e-21
breeding	381488	PA_chr10	4598523	PA_chr10:678996545-678996545	678996545	CHG	5.62377e-20	6.95425e-31
breeding	381488	PA_chr10	4598523	PA_chr10:678996563-678996563	678996563	CHG	2.2122e-16	9.44573e-26
breeding	381488	PA_chr10	4598523	PA_chr10:678996605-678996605	678996605	CHG	5.73792e-18	3.97467e-29
breeding	387400	PA_chr10	4598523	PA_chr10:849020141-849020141	849020141	CHG	5.35614e-11	2.0222e-21
breeding	393057	PA_chr10	4598523	PA_chr10:1062996041-1062996041	1062996041	CHG	1.14674e-22	7.96999e-23
breeding	393057	PA_chr10	4598523	PA_chr10:1062996047-1062996047	1062996047	CHG	8.39924e-20	9.18521e-29
breeding	393057	PA_chr10	4598523	PA_chr10:1062996074-1062996074	1062996074	CHG	4.42378e-21	1.59948e-29
breeding	393057	PA_chr10	4598523	PA_chr10:1062996079-1062996079	1062996079	CHG	2.27427e-23	4.82967e-37
breeding	363945	PA_chr10	4598526	PA_chr10:79077266-79077266	79077266	CHG	1.41748e-11	1.11167e-18
breeding	376763	PA_chr10	4598526	PA_chr10:434977680-434977680	434977680	CHG	1.85482e-11	1.64366e-27
breeding	376763	PA_chr10	4598526	PA_chr10:434977686-434977686	434977686	CHG	2.13187e-13	8.68137e-43
breeding	376763	PA_chr10	4598526	PA_chr10:434977816-434977816	434977816	CHG	3.02627e-11	1.10461e-32
breeding	381555	PA_chr10	4598526	PA_chr10:680497966-680497966	680497966	CHG	1.93221e-12	1.99051e-18
breeding	393058	PA_chr10	4598526	PA_chr10:1062996041-1062996041	1062996041	CHG	9.16991e-25	5.29623e-25
breeding	393058	PA_chr10	4598526	PA_chr10:1062996047-1062996047	1062996047	CHG	1.18545e-19	4.08408e-22
breeding	393058	PA_chr10	4598526	PA_chr10:1062996074-1062996074	1062996074	CHG	4.18664e-23	1.847e-27
breeding	393058	PA_chr10	4598526	PA_chr10:1062996079-1062996079	1062996079	CHG	2.21094e-25	9.47357e-35
breeding	363946	PA_chr10	4598542	PA_chr10:79077266-79077266	79077266	CHG	1.41748e-11	1.11167e-18
breeding	376764	PA_chr10	4598542	PA_chr10:434977680-434977680	434977680	CHG	1.85482e-11	9.14312e-28
breeding	376764	PA_chr10	4598542	PA_chr10:434977686-434977686	434977686	CHG	2.13187e-13	3.01899e-43
breeding	376764	PA_chr10	4598542	PA_chr10:434977816-434977816	434977816	CHG	3.02627e-11	8.1098e-33
breeding	381490	PA_chr10	4598542	PA_chr10:678995995-678995995	678995995	CHG	2.10242e-30	5.38489e-56
breeding	381490	PA_chr10	4598542	PA_chr10:678996021-678996021	678996021	CHG	1.14536e-34	5.42529e-100
breeding	381490	PA_chr10	4598542	PA_chr10:678996025-678996025	678996025	CHG	2.17544e-31	6.36334e-66
breeding	381490	PA_chr10	4598542	PA_chr10:678996079-678996079	678996079	CHG	6.34393e-22	8.99523e-38
breeding	381490	PA_chr10	4598542	PA_chr10:678996098-678996098	678996098	CHG	1.65887e-24	2.87254e-44
breeding	381490	PA_chr10	4598542	PA_chr10:678996112-678996112	678996112	CHG	2.5957e-28	4.98106e-58
breeding	381490	PA_chr10	4598542	PA_chr10:678996123-678996123	678996123	CHG	4.89266e-25	9.98664e-43
breeding	381490	PA_chr10	4598542	PA_chr10:678996129-678996129	678996129	CHG	1.797e-34	9.85099e-82
breeding	381490	PA_chr10	4598542	PA_chr10:678996184-678996184	678996184	CHG	1.57013e-31	9.65329e-49
breeding	381490	PA_chr10	4598542	PA_chr10:678996457-678996457	678996457	CHG	2.06597e-19	1.13064e-28
breeding	381490	PA_chr10	4598542	PA_chr10:678996509-678996509	678996509	CHG	2.82482e-18	6.11035e-26
breeding	381490	PA_chr10	4598542	PA_chr10:678996545-678996545	678996545	CHG	6.51811e-25	2.40502e-40
breeding	381490	PA_chr10	4598542	PA_chr10:678996563-678996563	678996563	CHG	1.05471e-22	7.678e-37
breeding	381490	PA_chr10	4598542	PA_chr10:678996605-678996605	678996605	CHG	3.56548e-20	2.33389e-28
breeding	393059	PA_chr10	4598542	PA_chr10:1062996041-1062996041	1062996041	CHG	7.77909e-25	5.21518e-25
breeding	393059	PA_chr10	4598542	PA_chr10:1062996047-1062996047	1062996047	CHG	4.83858e-21	1.29919e-22
breeding	393059	PA_chr10	4598542	PA_chr10:1062996074-1062996074	1062996074	CHG	3.87915e-24	5.65306e-28
breeding	393059	PA_chr10	4598542	PA_chr10:1062996079-1062996079	1062996079	CHG	1.18189e-26	1.64565e-35
breeding	363947	PA_chr10	4599972	PA_chr10:79077266-79077266	79077266	CHG	1.41748e-11	1.11167e-18
breeding	386263	PA_chr10	4599972	PA_chr10:830853545-830853545	830853545	CHG	1.5399e-16	9.46435e-41
breeding	386263	PA_chr10	4599972	PA_chr10:830853556-830853556	830853556	CHG	1.19122e-13	4.088e-30
breeding	386263	PA_chr10	4599972	PA_chr10:830853614-830853614	830853614	CHG	1.68297e-17	1.99353e-38
breeding	386263	PA_chr10	4599972	PA_chr10:830853676-830853676	830853676	CHG	4.57111e-18	5.97534e-43
breeding	386263	PA_chr10	4599972	PA_chr10:830853689-830853689	830853689	CHG	2.82247e-17	3.06431e-40
breeding	362979	PA_chr10	4600012	PA_chr10:51147271-51147271	51147271	CHG	1.36871e-12	2.91198e-23
breeding	363948	PA_chr10	4600012	PA_chr10:79077273-79077273	79077273	CHG	2.56046e-11	8.76598e-17
breeding	382923	PA_chr10	4600012	PA_chr10:726049297-726049297	726049297	CHG	1.61076e-11	9.12823e-31
breeding	374142	PA_chr10	4600085	PA_chr10:368027679-368027679	368027679	CHG	5.34294e-23	8.87673e-29
breeding	387405	PA_chr10	4600085	PA_chr10:849020199-849020199	849020199	CHG	3.11408e-13	1.33732e-27
breeding	362981	PA_chr10	4735061	PA_chr10:51147271-51147271	51147271	CHG	1.36871e-12	2.91198e-23
breeding	363950	PA_chr10	4735061	PA_chr10:79077241-79077241	79077241	CHG	8.73545e-16	4.0299e-23
breeding	374143	PA_chr10	4735061	PA_chr10:368027679-368027679	368027679	CHG	5.34294e-23	2.01925e-27
breeding	376768	PA_chr10	4735061	PA_chr10:434977680-434977680	434977680	CHG	1.9634e-12	6.37154e-22
breeding	376768	PA_chr10	4735061	PA_chr10:434977686-434977686	434977686	CHG	3.75444e-16	8.85042e-36
breeding	376768	PA_chr10	4735061	PA_chr10:434977707-434977707	434977707	CHG	2.98904e-11	1.54629e-15
breeding	376768	PA_chr10	4735061	PA_chr10:434977757-434977757	434977757	CHG	2.7831e-12	6.46262e-23
breeding	376768	PA_chr10	4735061	PA_chr10:434977816-434977816	434977816	CHG	5.00053e-14	3.5369e-28
breeding	376768	PA_chr10	4735061	PA_chr10:434977826-434977826	434977826	CHG	4.09289e-13	1.86686e-25
breeding	376768	PA_chr10	4735061	PA_chr10:434977862-434977862	434977862	CHG	2.44684e-12	2.14328e-25
breeding	376768	PA_chr10	4735061	PA_chr10:434977922-434977922	434977922	CHG	4.09725e-14	3.82269e-32
breeding	376768	PA_chr10	4735061	PA_chr10:434977935-434977935	434977935	CHG	1.67434e-14	1.51485e-29
breeding	376768	PA_chr10	4735061	PA_chr10:434977943-434977943	434977943	CHG	8.10234e-15	3.60419e-29
breeding	370232	PA_chr10	4735063	PA_chr10:243932251-243932251	243932251	CHG	1.72763e-13	1.6764e-12
breeding	376769	PA_chr10	4735063	PA_chr10:434977621-434977621	434977621	CHG	2.1521e-12	4.85769e-26
breeding	376769	PA_chr10	4735063	PA_chr10:434977680-434977680	434977680	CHG	1.13287e-16	3.87912e-33
breeding	376769	PA_chr10	4735063	PA_chr10:434977686-434977686	434977686	CHG	1.95574e-20	3.20381e-53
breeding	376769	PA_chr10	4735063	PA_chr10:434977707-434977707	434977707	CHG	1.10728e-11	1.06184e-21
breeding	376769	PA_chr10	4735063	PA_chr10:434977757-434977757	434977757	CHG	3.31665e-15	2.50449e-31
breeding	376769	PA_chr10	4735063	PA_chr10:434977816-434977816	434977816	CHG	2.43186e-18	8.65666e-42
breeding	376769	PA_chr10	4735063	PA_chr10:434977826-434977826	434977826	CHG	1.24913e-17	9.67796e-39
breeding	376769	PA_chr10	4735063	PA_chr10:434977862-434977862	434977862	CHG	5.62358e-16	5.21355e-36
breeding	376769	PA_chr10	4735063	PA_chr10:434977922-434977922	434977922	CHG	1.84462e-18	3.78101e-47
breeding	376769	PA_chr10	4735063	PA_chr10:434977935-434977935	434977935	CHG	5.12277e-18	3.64561e-42
breeding	376769	PA_chr10	4735063	PA_chr10:434977943-434977943	434977943	CHG	1.5561e-17	5.49384e-41
breeding	363952	PA_chr10	4735079	PA_chr10:79077212-79077212	79077212	CHG	6.80129e-14	3.30221e-19
breeding	382337	PA_chr10	4735081	PA_chr10:701892175-701892175	701892175	CHG	1.20719e-14	2.75487e-35
breeding	372374	PA_chr10	4735135	PA_chr10:300262700-300262700	300262700	CHG	1.22837e-22	8.31729e-47
breeding	376772	PA_chr10	4735135	PA_chr10:434977621-434977621	434977621	CHG	1.21754e-12	6.61923e-28
breeding	376772	PA_chr10	4735135	PA_chr10:434977680-434977680	434977680	CHG	7.5598e-13	4.29984e-31
breeding	376772	PA_chr10	4735135	PA_chr10:434977686-434977686	434977686	CHG	6.40603e-19	1.38441e-55
breeding	376772	PA_chr10	4735135	PA_chr10:434977757-434977757	434977757	CHG	1.44327e-14	1.37386e-33
breeding	376772	PA_chr10	4735135	PA_chr10:434977816-434977816	434977816	CHG	2.78439e-16	1.76879e-42
breeding	376772	PA_chr10	4735135	PA_chr10:434977826-434977826	434977826	CHG	9.39041e-15	5.93088e-38
breeding	376772	PA_chr10	4735135	PA_chr10:434977862-434977862	434977862	CHG	1.89714e-16	7.12632e-39
breeding	376772	PA_chr10	4735135	PA_chr10:434977922-434977922	434977922	CHG	2.51933e-21	3.26972e-54
breeding	376772	PA_chr10	4735135	PA_chr10:434977935-434977935	434977935	CHG	3.70794e-17	1.88036e-44
breeding	376772	PA_chr10	4735135	PA_chr10:434977943-434977943	434977943	CHG	5.49441e-21	1.80403e-46
breeding	378917	PA_chr10	4735135	PA_chr10:576936982-576936982	576936982	CHG	7.96219e-15	1.26017e-12
breeding	382338	PA_chr10	4735135	PA_chr10:701892175-701892175	701892175	CHG	1.20719e-14	2.75487e-35
breeding	372375	PA_chr10	4735269	PA_chr10:300262700-300262700	300262700	CHG	9.61134e-21	4.68771e-34
breeding	382339	PA_chr10	4735269	PA_chr10:701892183-701892183	701892183	CHG	1.54912e-21	4.14785e-46
breeding	392616	PA_chr10	4735269	PA_chr10:1030619074-1030619074	1030619074	CHG	2.23901e-14	4.48277e-21
breeding	392616	PA_chr10	4735269	PA_chr10:1030619131-1030619131	1030619131	CHG	6.54681e-13	1.06952e-17
breeding	392616	PA_chr10	4735269	PA_chr10:1030619138-1030619138	1030619138	CHG	1.24413e-14	5.82838e-23
breeding	392616	PA_chr10	4735269	PA_chr10:1030619143-1030619143	1030619143	CHG	3.85378e-18	2.51535e-29
breeding	392616	PA_chr10	4735269	PA_chr10:1030619147-1030619147	1030619147	CHG	2.14525e-12	1.27621e-17
breeding	392616	PA_chr10	4735269	PA_chr10:1030619156-1030619156	1030619156	CHG	1.24381e-18	8.85014e-31
breeding	392616	PA_chr10	4735269	PA_chr10:1030619214-1030619214	1030619214	CHG	2.71716e-18	1.63154e-27
breeding	392616	PA_chr10	4735269	PA_chr10:1030619519-1030619519	1030619519	CHG	2.42626e-17	2.31084e-27
breeding	392616	PA_chr10	4735269	PA_chr10:1030619549-1030619549	1030619549	CHG	8.4255e-15	9.07663e-23
breeding	392616	PA_chr10	4735269	PA_chr10:1030619561-1030619561	1030619561	CHG	3.20654e-20	4.68295e-32
breeding	392616	PA_chr10	4735269	PA_chr10:1030619571-1030619571	1030619571	CHG	6.92225e-13	4.92557e-16
breeding	392616	PA_chr10	4735269	PA_chr10:1030619581-1030619581	1030619581	CHG	1.44747e-17	5.22847e-27
breeding	392616	PA_chr10	4735269	PA_chr10:1030619629-1030619629	1030619629	CHG	2.31521e-15	4.54568e-19
breeding	392616	PA_chr10	4735269	PA_chr10:1030619641-1030619641	1030619641	CHG	1.64746e-19	6.91938e-28
breeding	392616	PA_chr10	4735269	PA_chr10:1030619645-1030619645	1030619645	CHG	2.33708e-19	1.06526e-28
breeding	392616	PA_chr10	4735269	PA_chr10:1030619658-1030619658	1030619658	CHG	1.81007e-17	2.20918e-25
breeding	392616	PA_chr10	4735269	PA_chr10:1030619689-1030619689	1030619689	CHG	5.17443e-16	8.87061e-21
breeding	392616	PA_chr10	4735269	PA_chr10:1030619693-1030619693	1030619693	CHG	8.77246e-16	3.56393e-23
breeding	370237	PA_chr10	4735338	PA_chr10:243932234-243932234	243932234	CHG	2.29738e-11	6.81687e-14
breeding	370237	PA_chr10	4735338	PA_chr10:243932251-243932251	243932251	CHG	2.15646e-14	1.79982e-13
breeding	372376	PA_chr10	4735338	PA_chr10:300262700-300262700	300262700	CHG	3.79145e-21	3.80522e-34
breeding	382340	PA_chr10	4735338	PA_chr10:701892175-701892175	701892175	CHG	1.20719e-14	2.75487e-35
breeding	372377	PA_chr10	4735367	PA_chr10:300262700-300262700	300262700	CHG	5.71721e-13	1.32676e-21
breeding	380266	PA_chr10	4735367	PA_chr10:637432333-637432333	637432333	CHG	4.10485e-11	1.04848e-15
breeding	382342	PA_chr10	4735389	PA_chr10:701892175-701892175	701892175	CHG	3.14749e-15	1.43314e-38
breeding	389191	PA_chr10	4735389	PA_chr10:929766773-929766773	929766773	CHG	3.40851e-12	5.01437e-18
breeding	381570	PA_chr10	4860764	PA_chr10:680497966-680497966	680497966	CHG	5.22964e-15	9.17612e-20
breeding	393631	PA_chr10	4860764	PA_chr10:1097362792-1097362792	1097362792	CHG	1.68376e-15	3.14786e-21
breeding	393631	PA_chr10	4860764	PA_chr10:1097362858-1097362858	1097362858	CHG	8.10745e-21	1.55737e-33
breeding	393631	PA_chr10	4860764	PA_chr10:1097362895-1097362895	1097362895	CHG	3.02939e-18	3.21941e-29
breeding	393631	PA_chr10	4860764	PA_chr10:1097362912-1097362912	1097362912	CHG	4.41621e-14	4.41311e-22
breeding	393631	PA_chr10	4860764	PA_chr10:1097362949-1097362949	1097362949	CHG	3.50211e-19	1.17712e-30
breeding	362033	PA_chr10	4860781	PA_chr10:13595723-13595723	13595723	CHG	1.88632e-20	3.0156e-28
breeding	381571	PA_chr10	4860781	PA_chr10:680497966-680497966	680497966	CHG	6.5932e-16	4.59808e-26
breeding	381573	PA_chr10	4860871	PA_chr10:680497966-680497966	680497966	CHG	3.5021e-15	3.49011e-27
breeding	374817	PA_chr10	4860942	PA_chr10:381207926-381207926	381207926	CHG	5.74131e-17	2.00921e-28
breeding	374817	PA_chr10	4860942	PA_chr10:381207949-381207949	381207949	CHG	3.0641e-25	4.48714e-51
breeding	374817	PA_chr10	4860942	PA_chr10:381207955-381207955	381207955	CHG	2.05687e-23	1.02632e-44
breeding	389199	PA_chr10	4861099	PA_chr10:929766663-929766663	929766663	CHG	3.07109e-12	7.27553e-28
breeding	389199	PA_chr10	4861099	PA_chr10:929766677-929766677	929766677	CHG	3.06793e-12	1.02239e-28
breeding	389199	PA_chr10	4861099	PA_chr10:929766686-929766686	929766686	CHG	7.47002e-12	1.27526e-26
breeding	382034	PA_chr10	5629971	PA_chr10:692857789-692857789	692857789	CHG	5.55657e-11	1.75943e-28
breeding	374824	PA_chr10	5629972	PA_chr10:381207955-381207955	381207955	CHG	1.13736e-11	3.31806e-17
breeding	376533	PA_chr10	5629972	PA_chr10:428353144-428353144	428353144	CHG	1.55097e-11	1.68252e-13
breeding	376533	PA_chr10	5629972	PA_chr10:428353197-428353197	428353197	CHG	2.04532e-14	8.57403e-19
breeding	382035	PA_chr10	5629972	PA_chr10:692857789-692857789	692857789	CHG	5.55657e-11	1.75943e-28
breeding	372394	PA_chr10	5629977	PA_chr10:300262700-300262700	300262700	CHG	5.47541e-15	2.50903e-23
breeding	372399	PA_chr10	5630034	PA_chr10:300262470-300262470	300262470	CHG	3.17168e-19	5.84699e-33
breeding	382052	PA_chr10	5630071	PA_chr10:692857789-692857789	692857789	CHG	2.35748e-22	2.81672e-52
breeding	382052	PA_chr10	5630071	PA_chr10:692857804-692857804	692857804	CHG	1.3433e-19	7.23455e-46
breeding	372411	PA_chr10	5630098	PA_chr10:300262700-300262700	300262700	CHG	5.21874e-27	5.66017e-46
breeding	389317	PA_chr10	5630100	PA_chr10:935300158-935300158	935300158	CHG	1.29069e-24	1.61919e-26
breeding	389317	PA_chr10	5630100	PA_chr10:935300161-935300161	935300161	CHG	2.57957e-25	1.52813e-27
breeding	389317	PA_chr10	5630100	PA_chr10:935300167-935300167	935300167	CHG	1.22184e-25	7.66837e-28
breeding	389317	PA_chr10	5630100	PA_chr10:935300191-935300191	935300191	CHG	1.09332e-19	4.47553e-28
breeding	389317	PA_chr10	5630100	PA_chr10:935300200-935300200	935300200	CHG	2.08684e-25	3.56154e-35
breeding	389317	PA_chr10	5630100	PA_chr10:935300212-935300212	935300212	CHG	2.64154e-13	1.40258e-17
breeding	372414	PA_chr10	5630132	PA_chr10:300262700-300262700	300262700	CHG	7.45319e-14	7.42619e-23
breeding	393677	PA_chr10	5630187	PA_chr10:1097362858-1097362858	1097362858	CHG	1.41762e-11	1.36011e-20
breeding	393677	PA_chr10	5630187	PA_chr10:1097362895-1097362895	1097362895	CHG	5.88957e-11	3.96457e-19
[truncated: 23,436 more rows]

## Sheet: Supp Table S6
Table S6. Annotated robust SNPs
gene_id	snp	chr	pos	marker_id	context	gene_start	gene_end	gene_strand	distance_bp	ref	alt	af	n_associated_sites	associated_sites	associated_contexts	associated_site_chrs	associated_site_pos	annotation_class	cohort	eggnog_description	go_terms	kegg_ko	pfam_domain	panther_description	is_te_gene
PA_chr01_cUL0044_G000007	48458	PA_chr01_cUL0044	1220024	snp_48458_PA_chr01_cUL0044:1220024	CHG	1219767	1220711	+	0	A	G	0.082077	1	PA_chr01_cUL0044:3729366-3729366	CHG	PA_chr01_cUL0044	3729366	genic	BREEDING				Cotton fibre expressed protein		FALSE
PA_chr01_cUL0044_G000007	48419	PA_chr01_cUL0044	1220191	snp_48419_PA_chr01_cUL0044:1220191	CHH	1219767	1220711	+	0				1	PA_chr01_cUL0044:1917451-1917451	CHH	PA_chr01_cUL0044	1917451	genic	BREEDING				Cotton fibre expressed protein		FALSE
PA_chr01_cUL0044_G000007	48426	PA_chr01_cUL0044	1220317	snp_48426_PA_chr01_cUL0044:1220317	CHH	1219767	1220711	+	0	T	C	0.714286	1	PA_chr01_cUL0044:1917451-1917451	CHH	PA_chr01_cUL0044	1917451	genic	BREEDING				Cotton fibre expressed protein		FALSE
PA_chr01_cUL0044_G000007	55542	PA_chr01_cUL0044	1220126	snp_55542_PA_chr01_cUL0044:1220126	CHG	1219767	1220711	+	0				1	PA_chr01_cUL0044:1917236-1917236	CHG	PA_chr01_cUL0044	1917236	genic	NATURAL				Cotton fibre expressed protein		FALSE
PA_chr01_G000019	22074	PA_chr01	4033752	snp_22074_PA_chr01:4033752	CHG	4011421	4068670	+	0	A	G	0.620751	14	PA_chr01:732865283-732865283;PA_chr01:732865289-732865289;PA_chr01:732865295-732865295;PA_chr01:732865331-732865331;PA_chr01:732865352-732865352;PA_chr01:732865378-732865378;PA_chr01:732865425-732865425;PA_chr01:732865458-732865458;PA_chr01:732865481-732865481;PA_chr01:732865487-732865487;PA_chr01:732865503-732865503;PA_chr01:732865516-732865516;PA_chr01:732865616-732865616;PA_chr01:732865619-732…	CHG;CHH	PA_chr01	732865283;732865289;732865295;732865331;732865352;732865378;732865425;732865458;732865481;732865487;732865503;732865516;732865616;732865619	genic	BREEDING	TMV resistance protein N-like			NB-ARC domain	LEUCINE-RICH REPEAT-CONTAINING PROTEIN	FALSE
PA_chr01_G000019	22074	PA_chr01	4033752	snp_22074_PA_chr01:4033752	CHG	4011421	4068670	+	0	A	G	0.620751	14	PA_chr01:732865283-732865283;PA_chr01:732865289-732865289;PA_chr01:732865295-732865295;PA_chr01:732865331-732865331;PA_chr01:732865352-732865352;PA_chr01:732865378-732865378;PA_chr01:732865425-732865425;PA_chr01:732865458-732865458;PA_chr01:732865481-732865481;PA_chr01:732865487-732865487;PA_chr01:732865503-732865503;PA_chr01:732865516-732865516;PA_chr01:732865616-732865616;PA_chr01:732865619-732…	CHG;CHH	PA_chr01	732865283;732865289;732865295;732865331;732865352;732865378;732865425;732865458;732865481;732865487;732865503;732865516;732865616;732865619	genic	BREEDING	TMV resistance protein N-like			NB-ARC domain	LEUCINE-RICH REPEAT-CONTAINING PROTEIN	FALSE
PA_chr01_G000019	22074	PA_chr01	4033752	snp_22074_PA_chr01:4033752	CHH	4011421	4068670	+	0	A	G	0.620751	14	PA_chr01:732865283-732865283;PA_chr01:732865289-732865289;PA_chr01:732865295-732865295;PA_chr01:732865331-732865331;PA_chr01:732865352-732865352;PA_chr01:732865378-732865378;PA_chr01:732865425-732865425;PA_chr01:732865458-732865458;PA_chr01:732865481-732865481;PA_chr01:732865487-732865487;PA_chr01:732865503-732865503;PA_chr01:732865516-732865516;PA_chr01:732865616-732865616;PA_chr01:732865619-732…	CHG;CHH	PA_chr01	732865283;732865289;732865295;732865331;732865352;732865378;732865425;732865458;732865481;732865487;732865503;732865516;732865616;732865619	genic	BREEDING	TMV resistance protein N-like			NB-ARC domain	LEUCINE-RICH REPEAT-CONTAINING PROTEIN	FALSE
PA_chr01_G000019	22074	PA_chr01	4033752	snp_22074_PA_chr01:4033752	CHH	4011421	4068670	+	0	A	G	0.620751	14	PA_chr01:732865283-732865283;PA_chr01:732865289-732865289;PA_chr01:732865295-732865295;PA_chr01:732865331-732865331;PA_chr01:732865352-732865352;PA_chr01:732865378-732865378;PA_chr01:732865425-732865425;PA_chr01:732865458-732865458;PA_chr01:732865481-732865481;PA_chr01:732865487-732865487;PA_chr01:732865503-732865503;PA_chr01:732865516-732865516;PA_chr01:732865616-732865616;PA_chr01:732865619-732…	CHG;CHH	PA_chr01	732865283;732865289;732865295;732865331;732865352;732865378;732865425;732865458;732865481;732865487;732865503;732865516;732865616;732865619	genic	BREEDING	TMV resistance protein N-like			NB-ARC domain	LEUCINE-RICH REPEAT-CONTAINING PROTEIN	FALSE
PA_chr01_G000019	22104	PA_chr01	4060710	snp_22104_PA_chr01:4060710	CHG	4011421	4068670	+	0	A	G	0.164298	13	PA_chr01:732865283-732865283;PA_chr01:732865289-732865289;PA_chr01:732865295-732865295;PA_chr01:732865331-732865331;PA_chr01:732865352-732865352;PA_chr01:732865378-732865378;PA_chr01:732865425-732865425;PA_chr01:732865458-732865458;PA_chr01:732865487-732865487;PA_chr01:732865503-732865503;PA_chr01:732865516-732865516;PA_chr01:732865616-732865616;PA_chr01:732865619-732865619	CHG;CHH	PA_chr01	732865283;732865289;732865295;732865331;732865352;732865378;732865425;732865458;732865487;732865503;732865516;732865616;732865619	genic	BREEDING	TMV resistance protein N-like			NB-ARC domain	LEUCINE-RICH REPEAT-CONTAINING PROTEIN	FALSE
PA_chr01_G000019	22104	PA_chr01	4060710	snp_22104_PA_chr01:4060710	CHG	4011421	4068670	+	0	A	G	0.164298	13	PA_chr01:732865283-732865283;PA_chr01:732865289-732865289;PA_chr01:732865295-732865295;PA_chr01:732865331-732865331;PA_chr01:732865352-732865352;PA_chr01:732865378-732865378;PA_chr01:732865425-732865425;PA_chr01:732865458-732865458;PA_chr01:732865487-732865487;PA_chr01:732865503-732865503;PA_chr01:732865516-732865516;PA_chr01:732865616-732865616;PA_chr01:732865619-732865619	CHG;CHH	PA_chr01	732865283;732865289;732865295;732865331;732865352;732865378;732865425;732865458;732865487;732865503;732865516;732865616;732865619	genic	BREEDING	TMV resistance protein N-like			NB-ARC domain	LEUCINE-RICH REPEAT-CONTAINING PROTEIN	FALSE
PA_chr01_G000019	8669	PA_chr01	4033824	snp_8669_PA_chr01:4033824	CHG	4011421	4068670	+	0	T	C	0.44573	13	PA_chr01:257696861-257696861;PA_chr01:257696936-257696936;PA_chr01:257696957-257696957;PA_chr01:257696980-257696980;PA_chr01:257696997-257696997;PA_chr01:257697055-257697055;PA_chr01:257697068-257697068;PA_chr01:257697079-257697079;PA_chr01:257697083-257697083;PA_chr01:257697091-257697091;PA_chr01:257697100-257697100;PA_chr01:257697126-257697126;PA_chr01:257697143-257697143	CHG;CHH;CpG	PA_chr01	257696861;257696936;257696957;257696980;257696997;257697055;257697068;257697079;257697083;257697091;257697100;257697126;257697143	genic	BREEDING	TMV resistance protein N-like			NB-ARC domain	LEUCINE-RICH REPEAT-CONTAINING PROTEIN	FALSE
PA_chr01_G000019	8669	PA_chr01	4033824	snp_8669_PA_chr01:4033824	CHG	4011421	4068670	+	0	T	C	0.44573	13	PA_chr01:257696861-257696861;PA_chr01:257696936-257696936;PA_chr01:257696957-257696957;PA_chr01:257696980-257696980;PA_chr01:257696997-257696997;PA_chr01:257697055-257697055;PA_chr01:257697068-257697068;PA_chr01:257697079-257697079;PA_chr01:257697083-257697083;PA_chr01:257697091-257697091;PA_chr01:257697100-257697100;PA_chr01:257697126-257697126;PA_chr01:257697143-257697143	CHG;CHH;CpG	PA_chr01	257696861;257696936;257696957;257696980;257696997;257697055;257697068;257697079;257697083;257697091;257697100;257697126;257697143	genic	BREEDING	TMV resistance protein N-like			NB-ARC domain	LEUCINE-RICH REPEAT-CONTAINING PROTEIN	FALSE
PA_chr01_G000019	8669	PA_chr01	4033824	snp_8669_PA_chr01:4033824	CHG	4011421	4068670	+	0	T	C	0.44573	13	PA_chr01:257696861-257696861;PA_chr01:257696936-257696936;PA_chr01:257696957-257696957;PA_chr01:257696980-257696980;PA_chr01:257696997-257696997;PA_chr01:257697055-257697055;PA_chr01:257697068-257697068;PA_chr01:257697079-257697079;PA_chr01:257697083-257697083;PA_chr01:257697091-257697091;PA_chr01:257697100-257697100;PA_chr01:257697126-257697126;PA_chr01:257697143-257697143	CHG;CHH;CpG	PA_chr01	257696861;257696936;257696957;257696980;257696997;257697055;257697068;257697079;257697083;257697091;257697100;257697126;257697143	genic	BREEDING	TMV resistance protein N-like			NB-ARC domain	LEUCINE-RICH REPEAT-CONTAINING PROTEIN	FALSE
PA_chr01_G000019	22104	PA_chr01	4060710	snp_22104_PA_chr01:4060710	CHH	4011421	4068670	+	0	A	G	0.164298	13	PA_chr01:732865283-732865283;PA_chr01:732865289-732865289;PA_chr01:732865295-732865295;PA_chr01:732865331-732865331;PA_chr01:732865352-732865352;PA_chr01:732865378-732865378;PA_chr01:732865425-732865425;PA_chr01:732865458-732865458;PA_chr01:732865487-732865487;PA_chr01:732865503-732865503;PA_chr01:732865516-732865516;PA_chr01:732865616-732865616;PA_chr01:732865619-732865619	CHG;CHH	PA_chr01	732865283;732865289;732865295;732865331;732865352;732865378;732865425;732865458;732865487;732865503;732865516;732865616;732865619	genic	BREEDING	TMV resistance protein N-like			NB-ARC domain	LEUCINE-RICH REPEAT-CONTAINING PROTEIN	FALSE
PA_chr01_G000019	22104	PA_chr01	4060710	snp_22104_PA_chr01:4060710	CHH	4011421	4068670	+	0	A	G	0.164298	13	PA_chr01:732865283-732865283;PA_chr01:732865289-732865289;PA_chr01:732865295-732865295;PA_chr01:732865331-732865331;PA_chr01:732865352-732865352;PA_chr01:732865378-732865378;PA_chr01:732865425-732865425;PA_chr01:732865458-732865458;PA_chr01:732865487-732865487;PA_chr01:732865503-732865503;PA_chr01:732865516-732865516;PA_chr01:732865616-732865616;PA_chr01:732865619-732865619	CHG;CHH	PA_chr01	732865283;732865289;732865295;732865331;732865352;732865378;732865425;732865458;732865487;732865503;732865516;732865616;732865619	genic	BREEDING	TMV resistance protein N-like			NB-ARC domain	LEUCINE-RICH REPEAT-CONTAINING PROTEIN	FALSE
PA_chr01_G000019	8669	PA_chr01	4033824	snp_8669_PA_chr01:4033824	CHH	4011421	4068670	+	0	T	C	0.44573	13	PA_chr01:257696861-257696861;PA_chr01:257696936-257696936;PA_chr01:257696957-257696957;PA_chr01:257696980-257696980;PA_chr01:257696997-257696997;PA_chr01:257697055-257697055;PA_chr01:257697068-257697068;PA_chr01:257697079-257697079;PA_chr01:257697083-257697083;PA_chr01:257697091-257697091;PA_chr01:257697100-257697100;PA_chr01:257697126-257697126;PA_chr01:257697143-257697143	CHG;CHH;CpG	PA_chr01	257696861;257696936;257696957;257696980;257696997;257697055;257697068;257697079;257697083;257697091;257697100;257697126;257697143	genic	BREEDING	TMV resistance protein N-like			NB-ARC domain	LEUCINE-RICH REPEAT-CONTAINING PROTEIN	FALSE
PA_chr01_G000019	8669	PA_chr01	4033824	snp_8669_PA_chr01:4033824	CHH	4011421	4068670	+	0	T	C	0.44573	13	PA_chr01:257696861-257696861;PA_chr01:257696936-257696936;PA_chr01:257696957-257696957;PA_chr01:257696980-257696980;PA_chr01:257696997-257696997;PA_chr01:257697055-257697055;PA_chr01:257697068-257697068;PA_chr01:257697079-257697079;PA_chr01:257697083-257697083;PA_chr01:257697091-257697091;PA_chr01:257697100-257697100;PA_chr01:257697126-257697126;PA_chr01:257697143-257697143	CHG;CHH;CpG	PA_chr01	257696861;257696936;257696957;257696980;257696997;257697055;257697068;257697079;257697083;257697091;257697100;257697126;257697143	genic	BREEDING	TMV resistance protein N-like			NB-ARC domain	LEUCINE-RICH REPEAT-CONTAINING PROTEIN	FALSE
PA_chr01_G000019	8669	PA_chr01	4033824	snp_8669_PA_chr01:4033824	CHH	4011421	4068670	+	0	T	C	0.44573	13	PA_chr01:257696861-257696861;PA_chr01:257696936-257696936;PA_chr01:257696957-257696957;PA_chr01:257696980-257696980;PA_chr01:257696997-257696997;PA_chr01:257697055-257697055;PA_chr01:257697068-257697068;PA_chr01:257697079-257697079;PA_chr01:257697083-257697083;PA_chr01:257697091-257697091;PA_chr01:257697100-257697100;PA_chr01:257697126-257697126;PA_chr01:257697143-257697143	CHG;CHH;CpG	PA_chr01	257696861;257696936;257696957;257696980;257696997;257697055;257697068;257697079;257697083;257697091;257697100;257697126;257697143	genic	BREEDING	TMV resistance protein N-like			NB-ARC domain	LEUCINE-RICH REPEAT-CONTAINING PROTEIN	FALSE
PA_chr01_G000019	8669	PA_chr01	4033824	snp_8669_PA_chr01:4033824	CpG	4011421	4068670	+	0	T	C	0.44573	13	PA_chr01:257696861-257696861;PA_chr01:257696936-257696936;PA_chr01:257696957-257696957;PA_chr01:257696980-257696980;PA_chr01:257696997-257696997;PA_chr01:257697055-257697055;PA_chr01:257697068-257697068;PA_chr01:257697079-257697079;PA_chr01:257697083-257697083;PA_chr01:257697091-257697091;PA_chr01:257697100-257697100;PA_chr01:257697126-257697126;PA_chr01:257697143-257697143	CHG;CHH;CpG	PA_chr01	257696861;257696936;257696957;257696980;257696997;257697055;257697068;257697079;257697083;257697091;257697100;257697126;257697143	genic	BREEDING	TMV resistance protein N-like			NB-ARC domain	LEUCINE-RICH REPEAT-CONTAINING PROTEIN	FALSE
PA_chr01_G000019	8669	PA_chr01	4033824	snp_8669_PA_chr01:4033824	CpG	4011421	4068670	+	0	T	C	0.44573	13	PA_chr01:257696861-257696861;PA_chr01:257696936-257696936;PA_chr01:257696957-257696957;PA_chr01:257696980-257696980;PA_chr01:257696997-257696997;PA_chr01:257697055-257697055;PA_chr01:257697068-257697068;PA_chr01:257697079-257697079;PA_chr01:257697083-257697083;PA_chr01:257697091-257697091;PA_chr01:257697100-257697100;PA_chr01:257697126-257697126;PA_chr01:257697143-257697143	CHG;CHH;CpG	PA_chr01	257696861;257696936;257696957;257696980;257696997;257697055;257697068;257697079;257697083;257697091;257697100;257697126;257697143	genic	BREEDING	TMV resistance protein N-like			NB-ARC domain	LEUCINE-RICH REPEAT-CONTAINING PROTEIN	FALSE
PA_chr01_G000019	8669	PA_chr01	4033824	snp_8669_PA_chr01:4033824	CpG	4011421	4068670	+	0	T	C	0.44573	13	PA_chr01:257696861-257696861;PA_chr01:257696936-257696936;PA_chr01:257696957-257696957;PA_chr01:257696980-257696980;PA_chr01:257696997-257696997;PA_chr01:257697055-257697055;PA_chr01:257697068-257697068;PA_chr01:257697079-257697079;PA_chr01:257697083-257697083;PA_chr01:257697091-257697091;PA_chr01:257697100-257697100;PA_chr01:257697126-257697126;PA_chr01:257697143-257697143	CHG;CHH;CpG	PA_chr01	257696861;257696936;257696957;257696980;257696997;257697055;257697068;257697079;257697083;257697091;257697100;257697126;257697143	genic	BREEDING	TMV resistance protein N-like			NB-ARC domain	LEUCINE-RICH REPEAT-CONTAINING PROTEIN	FALSE
PA_chr01_G000019	46646	PA_chr01	4033824	snp_46646_PA_chr01:4033824	CHG	4011421	4068670	+	0	T	C	0.44573	11	PA_chr01:1631361505-1631361505;PA_chr01:1631361540-1631361540;PA_chr01:1631361550-1631361550;PA_chr01:1631361570-1631361570;PA_chr01:1631361573-1631361573;PA_chr01:1631361576-1631361576;PA_chr01:1631361581-1631361581;PA_chr01:1631361603-1631361603;PA_chr01:1631361604-1631361604;PA_chr01:1631361614-1631361614;PA_chr01:1631361620-1631361620	CHG;CpG	PA_chr01	1631361505;1631361540;1631361550;1631361570;1631361573;1631361576;1631361581;1631361603;1631361604;1631361614;1631361620	genic	BREEDING	TMV resistance protein N-like			NB-ARC domain	LEUCINE-RICH REPEAT-CONTAINING PROTEIN	FALSE
PA_chr01_G000019	46646	PA_chr01	4033824	snp_46646_PA_chr01:4033824	CHG	4011421	4068670	+	0	T	C	0.44573	11	PA_chr01:1631361505-1631361505;PA_chr01:1631361540-1631361540;PA_chr01:1631361550-1631361550;PA_chr01:1631361570-1631361570;PA_chr01:1631361573-1631361573;PA_chr01:1631361576-1631361576;PA_chr01:1631361581-1631361581;PA_chr01:1631361603-1631361603;PA_chr01:1631361604-1631361604;PA_chr01:1631361614-1631361614;PA_chr01:1631361620-1631361620	CHG;CpG	PA_chr01	1631361505;1631361540;1631361550;1631361570;1631361573;1631361576;1631361581;1631361603;1631361604;1631361614;1631361620	genic	BREEDING	TMV resistance protein N-like			NB-ARC domain	LEUCINE-RICH REPEAT-CONTAINING PROTEIN	FALSE
PA_chr01_G000019	46651	PA_chr01	4033856	snp_46651_PA_chr01:4033856	CHG	4011421	4068670	+	0	T	A	0.116756	11	PA_chr01:1631361505-1631361505;PA_chr01:1631361540-1631361540;PA_chr01:1631361550-1631361550;PA_chr01:1631361570-1631361570;PA_chr01:1631361573-1631361573;PA_chr01:1631361576-1631361576;PA_chr01:1631361581-1631361581;PA_chr01:1631361603-1631361603;PA_chr01:1631361604-1631361604;PA_chr01:1631361614-1631361614;PA_chr01:1631361620-1631361620	CHG;CpG	PA_chr01	1631361505;1631361540;1631361550;1631361570;1631361573;1631361576;1631361581;1631361603;1631361604;1631361614;1631361620	genic	BREEDING	TMV resistance protein N-like			NB-ARC domain	LEUCINE-RICH REPEAT-CONTAINING PROTEIN	FALSE
PA_chr01_G000019	46651	PA_chr01	4033856	snp_46651_PA_chr01:4033856	CHG	4011421	4068670	+	0	T	A	0.116756	11	PA_chr01:1631361505-1631361505;PA_chr01:1631361540-1631361540;PA_chr01:1631361550-1631361550;PA_chr01:1631361570-1631361570;PA_chr01:1631361573-1631361573;PA_chr01:1631361576-1631361576;PA_chr01:1631361581-1631361581;PA_chr01:1631361603-1631361603;PA_chr01:1631361604-1631361604;PA_chr01:1631361614-1631361614;PA_chr01:1631361620-1631361620	CHG;CpG	PA_chr01	1631361505;1631361540;1631361550;1631361570;1631361573;1631361576;1631361581;1631361603;1631361604;1631361614;1631361620	genic	BREEDING	TMV resistance protein N-like			NB-ARC domain	LEUCINE-RICH REPEAT-CONTAINING PROTEIN	FALSE
PA_chr01_G000019	46657	PA_chr01	4060585	snp_46657_PA_chr01:4060585	CHG	4011421	4068670	+	0	G	C	0.0741758	11	PA_chr01:1631361505-1631361505;PA_chr01:1631361540-1631361540;PA_chr01:1631361550-1631361550;PA_chr01:1631361570-1631361570;PA_chr01:1631361573-1631361573;PA_chr01:1631361576-1631361576;PA_chr01:1631361581-1631361581;PA_chr01:1631361603-1631361603;PA_chr01:1631361604-1631361604;PA_chr01:1631361614-1631361614;PA_chr01:1631361620-1631361620	CHG;CpG	PA_chr01	1631361505;1631361540;1631361550;1631361570;1631361573;1631361576;1631361581;1631361603;1631361604;1631361614;1631361620	genic	BREEDING	TMV resistance protein N-like			NB-ARC domain	LEUCINE-RICH REPEAT-CONTAINING PROTEIN	FALSE
PA_chr01_G000019	46657	PA_chr01	4060585	snp_46657_PA_chr01:4060585	CHG	4011421	4068670	+	0	G	C	0.0741758	11	PA_chr01:1631361505-1631361505;PA_chr01:1631361540-1631361540;PA_chr01:1631361550-1631361550;PA_chr01:1631361570-1631361570;PA_chr01:1631361573-1631361573;PA_chr01:1631361576-1631361576;PA_chr01:1631361581-1631361581;PA_chr01:1631361603-1631361603;PA_chr01:1631361604-1631361604;PA_chr01:1631361614-1631361614;PA_chr01:1631361620-1631361620	CHG;CpG	PA_chr01	1631361505;1631361540;1631361550;1631361570;1631361573;1631361576;1631361581;1631361603;1631361604;1631361614;1631361620	genic	BREEDING	TMV resistance protein N-like			NB-ARC domain	LEUCINE-RICH REPEAT-CONTAINING PROTEIN	FALSE
PA_chr01_G000019	46663	PA_chr01	4060745	snp_46663_PA_chr01:4060745	CHG	4011421	4068670	+	0	G	A	0.076087	11	PA_chr01:1631361505-1631361505;PA_chr01:1631361540-1631361540;PA_chr01:1631361550-1631361550;PA_chr01:1631361570-1631361570;PA_chr01:1631361573-1631361573;PA_chr01:1631361576-1631361576;PA_chr01:1631361581-1631361581;PA_chr01:1631361603-1631361603;PA_chr01:1631361604-1631361604;PA_chr01:1631361614-1631361614;PA_chr01:1631361620-1631361620	CHG;CpG	PA_chr01	1631361505;1631361540;1631361550;1631361570;1631361573;1631361576;1631361581;1631361603;1631361604;1631361614;1631361620	genic	BREEDING	TMV resistance protein N-like			NB-ARC domain	LEUCINE-RICH REPEAT-CONTAINING PROTEIN	FALSE
PA_chr01_G000019	46663	PA_chr01	4060745	snp_46663_PA_chr01:4060745	CHG	4011421	4068670	+	0	G	A	0.076087	11	PA_chr01:1631361505-1631361505;PA_chr01:1631361540-1631361540;PA_chr01:1631361550-1631361550;PA_chr01:1631361570-1631361570;PA_chr01:1631361573-1631361573;PA_chr01:1631361576-1631361576;PA_chr01:1631361581-1631361581;PA_chr01:1631361603-1631361603;PA_chr01:1631361604-1631361604;PA_chr01:1631361614-1631361614;PA_chr01:1631361620-1631361620	CHG;CpG	PA_chr01	1631361505;1631361540;1631361550;1631361570;1631361573;1631361576;1631361581;1631361603;1631361604;1631361614;1631361620	genic	BREEDING	TMV resistance protein N-like			NB-ARC domain	LEUCINE-RICH REPEAT-CONTAINING PROTEIN	FALSE
PA_chr01_G000019	46666	PA_chr01	4060761	snp_46666_PA_chr01:4060761	CHG	4011421	4068670	+	0	G	A	0.057971	11	PA_chr01:1631361505-1631361505;PA_chr01:1631361540-1631361540;PA_chr01:1631361550-1631361550;PA_chr01:1631361570-1631361570;PA_chr01:1631361573-1631361573;PA_chr01:1631361576-1631361576;PA_chr01:1631361581-1631361581;PA_chr01:1631361603-1631361603;PA_chr01:1631361604-1631361604;PA_chr01:1631361614-1631361614;PA_chr01:1631361620-1631361620	CHG;CpG	PA_chr01	1631361505;1631361540;1631361550;1631361570;1631361573;1631361576;1631361581;1631361603;1631361604;1631361614;1631361620	genic	BREEDING	TMV resistance protein N-like			NB-ARC domain	LEUCINE-RICH REPEAT-CONTAINING PROTEIN	FALSE
PA_chr01_G000019	46666	PA_chr01	4060761	snp_46666_PA_chr01:4060761	CHG	4011421	4068670	+	0	G	A	0.057971	11	PA_chr01:1631361505-1631361505;PA_chr01:1631361540-1631361540;PA_chr01:1631361550-1631361550;PA_chr01:1631361570-1631361570;PA_chr01:1631361573-1631361573;PA_chr01:1631361576-1631361576;PA_chr01:1631361581-1631361581;PA_chr01:1631361603-1631361603;PA_chr01:1631361604-1631361604;PA_chr01:1631361614-1631361614;PA_chr01:1631361620-1631361620	CHG;CpG	PA_chr01	1631361505;1631361540;1631361550;1631361570;1631361573;1631361576;1631361581;1631361603;1631361604;1631361614;1631361620	genic	BREEDING	TMV resistance protein N-like			NB-ARC domain	LEUCINE-RICH REPEAT-CONTAINING PROTEIN	FALSE
PA_chr01_G000019	46646	PA_chr01	4033824	snp_46646_PA_chr01:4033824	CpG	4011421	4068670	+	0	T	C	0.44573	11	PA_chr01:1631361505-1631361505;PA_chr01:1631361540-1631361540;PA_chr01:1631361550-1631361550;PA_chr01:1631361570-1631361570;PA_chr01:1631361573-1631361573;PA_chr01:1631361576-1631361576;PA_chr01:1631361581-1631361581;PA_chr01:1631361603-1631361603;PA_chr01:1631361604-1631361604;PA_chr01:1631361614-1631361614;PA_chr01:1631361620-1631361620	CHG;CpG	PA_chr01	1631361505;1631361540;1631361550;1631361570;1631361573;1631361576;1631361581;1631361603;1631361604;1631361614;1631361620	genic	BREEDING	TMV resistance protein N-like			NB-ARC domain	LEUCINE-RICH REPEAT-CONTAINING PROTEIN	FALSE
PA_chr01_G000019	46646	PA_chr01	4033824	snp_46646_PA_chr01:4033824	CpG	4011421	4068670	+	0	T	C	0.44573	11	PA_chr01:1631361505-1631361505;PA_chr01:1631361540-1631361540;PA_chr01:1631361550-1631361550;PA_chr01:1631361570-1631361570;PA_chr01:1631361573-1631361573;PA_chr01:1631361576-1631361576;PA_chr01:1631361581-1631361581;PA_chr01:1631361603-1631361603;PA_chr01:1631361604-1631361604;PA_chr01:1631361614-1631361614;PA_chr01:1631361620-1631361620	CHG;CpG	PA_chr01	1631361505;1631361540;1631361550;1631361570;1631361573;1631361576;1631361581;1631361603;1631361604;1631361614;1631361620	genic	BREEDING	TMV resistance protein N-like			NB-ARC domain	LEUCINE-RICH REPEAT-CONTAINING PROTEIN	FALSE
PA_chr01_G000019	46651	PA_chr01	4033856	snp_46651_PA_chr01:4033856	CpG	4011421	4068670	+	0	T	A	0.116756	11	PA_chr01:1631361505-1631361505;PA_chr01:1631361540-1631361540;PA_chr01:1631361550-1631361550;PA_chr01:1631361570-1631361570;PA_chr01:1631361573-1631361573;PA_chr01:1631361576-1631361576;PA_chr01:1631361581-1631361581;PA_chr01:1631361603-1631361603;PA_chr01:1631361604-1631361604;PA_chr01:1631361614-1631361614;PA_chr01:1631361620-1631361620	CHG;CpG	PA_chr01	1631361505;1631361540;1631361550;1631361570;1631361573;1631361576;1631361581;1631361603;1631361604;1631361614;1631361620	genic	BREEDING	TMV resistance protein N-like			NB-ARC domain	LEUCINE-RICH REPEAT-CONTAINING PROTEIN	FALSE
PA_chr01_G000019	46651	PA_chr01	4033856	snp_46651_PA_chr01:4033856	CpG	4011421	4068670	+	0	T	A	0.116756	11	PA_chr01:1631361505-1631361505;PA_chr01:1631361540-1631361540;PA_chr01:1631361550-1631361550;PA_chr01:1631361570-1631361570;PA_chr01:1631361573-1631361573;PA_chr01:1631361576-1631361576;PA_chr01:1631361581-1631361581;PA_chr01:1631361603-1631361603;PA_chr01:1631361604-1631361604;PA_chr01:1631361614-1631361614;PA_chr01:1631361620-1631361620	CHG;CpG	PA_chr01	1631361505;1631361540;1631361550;1631361570;1631361573;1631361576;1631361581;1631361603;1631361604;1631361614;1631361620	genic	BREEDING	TMV resistance protein N-like			NB-ARC domain	LEUCINE-RICH REPEAT-CONTAINING PROTEIN	FALSE
PA_chr01_G000019	46657	PA_chr01	4060585	snp_46657_PA_chr01:4060585	CpG	4011421	4068670	+	0	G	C	0.0741758	11	PA_chr01:1631361505-1631361505;PA_chr01:1631361540-1631361540;PA_chr01:1631361550-1631361550;PA_chr01:1631361570-1631361570;PA_chr01:1631361573-1631361573;PA_chr01:1631361576-1631361576;PA_chr01:1631361581-1631361581;PA_chr01:1631361603-1631361603;PA_chr01:1631361604-1631361604;PA_chr01:1631361614-1631361614;PA_chr01:1631361620-1631361620	CHG;CpG	PA_chr01	1631361505;1631361540;1631361550;1631361570;1631361573;1631361576;1631361581;1631361603;1631361604;1631361614;1631361620	genic	BREEDING	TMV resistance protein N-like			NB-ARC domain	LEUCINE-RICH REPEAT-CONTAINING PROTEIN	FALSE
PA_chr01_G000019	46657	PA_chr01	4060585	snp_46657_PA_chr01:4060585	CpG	4011421	4068670	+	0	G	C	0.0741758	11	PA_chr01:1631361505-1631361505;PA_chr01:1631361540-1631361540;PA_chr01:1631361550-1631361550;PA_chr01:1631361570-1631361570;PA_chr01:1631361573-1631361573;PA_chr01:1631361576-1631361576;PA_chr01:1631361581-1631361581;PA_chr01:1631361603-1631361603;PA_chr01:1631361604-1631361604;PA_chr01:1631361614-1631361614;PA_chr01:1631361620-1631361620	CHG;CpG	PA_chr01	1631361505;1631361540;1631361550;1631361570;1631361573;1631361576;1631361581;1631361603;1631361604;1631361614;1631361620	genic	BREEDING	TMV resistance protein N-like			NB-ARC domain	LEUCINE-RICH REPEAT-CONTAINING PROTEIN	FALSE
PA_chr01_G000019	46663	PA_chr01	4060745	snp_46663_PA_chr01:4060745	CpG	4011421	4068670	+	0	G	A	0.076087	11	PA_chr01:1631361505-1631361505;PA_chr01:1631361540-1631361540;PA_chr01:1631361550-1631361550;PA_chr01:1631361570-1631361570;PA_chr01:1631361573-1631361573;PA_chr01:1631361576-1631361576;PA_chr01:1631361581-1631361581;PA_chr01:1631361603-1631361603;PA_chr01:1631361604-1631361604;PA_chr01:1631361614-1631361614;PA_chr01:1631361620-1631361620	CHG;CpG	PA_chr01	1631361505;1631361540;1631361550;1631361570;1631361573;1631361576;1631361581;1631361603;1631361604;1631361614;1631361620	genic	BREEDING	TMV resistance protein N-like			NB-ARC domain	LEUCINE-RICH REPEAT-CONTAINING PROTEIN	FALSE
PA_chr01_G000019	46663	PA_chr01	4060745	snp_46663_PA_chr01:4060745	CpG	4011421	4068670	+	0	G	A	0.076087	11	PA_chr01:1631361505-1631361505;PA_chr01:1631361540-1631361540;PA_chr01:1631361550-1631361550;PA_chr01:1631361570-1631361570;PA_chr01:1631361573-1631361573;PA_chr01:1631361576-1631361576;PA_chr01:1631361581-1631361581;PA_chr01:1631361603-1631361603;PA_chr01:1631361604-1631361604;PA_chr01:1631361614-1631361614;PA_chr01:1631361620-1631361620	CHG;CpG	PA_chr01	1631361505;1631361540;1631361550;1631361570;1631361573;1631361576;1631361581;1631361603;1631361604;1631361614;1631361620	genic	BREEDING	TMV resistance protein N-like			NB-ARC domain	LEUCINE-RICH REPEAT-CONTAINING PROTEIN	FALSE
PA_chr01_G000019	46666	PA_chr01	4060761	snp_46666_PA_chr01:4060761	CpG	4011421	4068670	+	0	G	A	0.057971	11	PA_chr01:1631361505-1631361505;PA_chr01:1631361540-1631361540;PA_chr01:1631361550-1631361550;PA_chr01:1631361570-1631361570;PA_chr01:1631361573-1631361573;PA_chr01:1631361576-1631361576;PA_chr01:1631361581-1631361581;PA_chr01:1631361603-1631361603;PA_chr01:1631361604-1631361604;PA_chr01:1631361614-1631361614;PA_chr01:1631361620-1631361620	CHG;CpG	PA_chr01	1631361505;1631361540;1631361550;1631361570;1631361573;1631361576;1631361581;1631361603;1631361604;1631361614;1631361620	genic	BREEDING	TMV resistance protein N-like			NB-ARC domain	LEUCINE-RICH REPEAT-CONTAINING PROTEIN	FALSE
PA_chr01_G000019	46666	PA_chr01	4060761	snp_46666_PA_chr01:4060761	CpG	4011421	4068670	+	0	G	A	0.057971	11	PA_chr01:1631361505-1631361505;PA_chr01:1631361540-1631361540;PA_chr01:1631361550-1631361550;PA_chr01:1631361570-1631361570;PA_chr01:1631361573-1631361573;PA_chr01:1631361576-1631361576;PA_chr01:1631361581-1631361581;PA_chr01:1631361603-1631361603;PA_chr01:1631361604-1631361604;PA_chr01:1631361614-1631361614;PA_chr01:1631361620-1631361620	CHG;CpG	PA_chr01	1631361505;1631361540;1631361550;1631361570;1631361573;1631361576;1631361581;1631361603;1631361604;1631361614;1631361620	genic	BREEDING	TMV resistance protein N-like			NB-ARC domain	LEUCINE-RICH REPEAT-CONTAINING PROTEIN	FALSE
PA_chr01_G000019	46647	PA_chr01	4033826	snp_46647_PA_chr01:4033826	CHG	4011421	4068670	+	0				10	PA_chr01:1631361540-1631361540;PA_chr01:1631361550-1631361550;PA_chr01:1631361570-1631361570;PA_chr01:1631361573-1631361573;PA_chr01:1631361576-1631361576;PA_chr01:1631361581-1631361581;PA_chr01:1631361603-1631361603;PA_chr01:1631361604-1631361604;PA_chr01:1631361614-1631361614;PA_chr01:1631361620-1631361620	CHG;CpG	PA_chr01	1631361540;1631361550;1631361570;1631361573;1631361576;1631361581;1631361603;1631361604;1631361614;1631361620	genic	BREEDING	TMV resistance protein N-like			NB-ARC domain	LEUCINE-RICH REPEAT-CONTAINING PROTEIN	FALSE
PA_chr01_G000019	46647	PA_chr01	4033826	snp_46647_PA_chr01:4033826	CHG	4011421	4068670	+	0				10	PA_chr01:1631361540-1631361540;PA_chr01:1631361550-1631361550;PA_chr01:1631361570-1631361570;PA_chr01:1631361573-1631361573;PA_chr01:1631361576-1631361576;PA_chr01:1631361581-1631361581;PA_chr01:1631361603-1631361603;PA_chr01:1631361604-1631361604;PA_chr01:1631361614-1631361614;PA_chr01:1631361620-1631361620	CHG;CpG	PA_chr01	1631361540;1631361550;1631361570;1631361573;1631361576;1631361581;1631361603;1631361604;1631361614;1631361620	genic	BREEDING	TMV resistance protein N-like			NB-ARC domain	LEUCINE-RICH REPEAT-CONTAINING PROTEIN	FALSE
PA_chr01_G000019	46647	PA_chr01	4033826	snp_46647_PA_chr01:4033826	CpG	4011421	4068670	+	0				10	PA_chr01:1631361540-1631361540;PA_chr01:1631361550-1631361550;PA_chr01:1631361570-1631361570;PA_chr01:1631361573-1631361573;PA_chr01:1631361576-1631361576;PA_chr01:1631361581-1631361581;PA_chr01:1631361603-1631361603;PA_chr01:1631361604-1631361604;PA_chr01:1631361614-1631361614;PA_chr01:1631361620-1631361620	CHG;CpG	PA_chr01	1631361540;1631361550;1631361570;1631361573;1631361576;1631361581;1631361603;1631361604;1631361614;1631361620	genic	BREEDING	TMV resistance protein N-like			NB-ARC domain	LEUCINE-RICH REPEAT-CONTAINING PROTEIN	FALSE
PA_chr01_G000019	46647	PA_chr01	4033826	snp_46647_PA_chr01:4033826	CpG	4011421	4068670	+	0				10	PA_chr01:1631361540-1631361540;PA_chr01:1631361550-1631361550;PA_chr01:1631361570-1631361570;PA_chr01:1631361573-1631361573;PA_chr01:1631361576-1631361576;PA_chr01:1631361581-1631361581;PA_chr01:1631361603-1631361603;PA_chr01:1631361604-1631361604;PA_chr01:1631361614-1631361614;PA_chr01:1631361620-1631361620	CHG;CpG	PA_chr01	1631361540;1631361550;1631361570;1631361573;1631361576;1631361581;1631361603;1631361604;1631361614;1631361620	genic	BREEDING	TMV resistance protein N-like			NB-ARC domain	LEUCINE-RICH REPEAT-CONTAINING PROTEIN	FALSE
PA_chr01_G000019	46916	PA_chr01	4033716	snp_46916_PA_chr01:4033716	CHG	4011421	4068670	+	0	G	A	0.0911552	8	PA_chr01:1636993893-1636993893;PA_chr01:1636993936-1636993936;PA_chr01:1636994073-1636994073;PA_chr01:1636994087-1636994087;PA_chr01:1636994096-1636994096;PA_chr01:1636994264-1636994264;PA_chr01:1636994307-1636994307;PA_chr01:1636994319-1636994319	CHG;CpG	PA_chr01	1636993893;1636993936;1636994073;1636994087;1636994096;1636994264;1636994307;1636994319	genic	BREEDING	TMV resistance protein N-like			NB-ARC domain	LEUCINE-RICH REPEAT-CONTAINING PROTEIN	FALSE
PA_chr01_G000019	46916	PA_chr01	4033716	snp_46916_PA_chr01:4033716	CHG	4011421	4068670	+	0	G	A	0.0911552	8	PA_chr01:1636993893-1636993893;PA_chr01:1636993936-1636993936;PA_chr01:1636994073-1636994073;PA_chr01:1636994087-1636994087;PA_chr01:1636994096-1636994096;PA_chr01:1636994264-1636994264;PA_chr01:1636994307-1636994307;PA_chr01:1636994319-1636994319	CHG;CpG	PA_chr01	1636993893;1636993936;1636994073;1636994087;1636994096;1636994264;1636994307;1636994319	genic	BREEDING	TMV resistance protein N-like			NB-ARC domain	LEUCINE-RICH REPEAT-CONTAINING PROTEIN	FALSE
PA_chr01_G000019	46916	PA_chr01	4033716	snp_46916_PA_chr01:4033716	CpG	4011421	4068670	+	0	G	A	0.0911552	8	PA_chr01:1636993893-1636993893;PA_chr01:1636993936-1636993936;PA_chr01:1636994073-1636994073;PA_chr01:1636994087-1636994087;PA_chr01:1636994096-1636994096;PA_chr01:1636994264-1636994264;PA_chr01:1636994307-1636994307;PA_chr01:1636994319-1636994319	CHG;CpG	PA_chr01	1636993893;1636993936;1636994073;1636994087;1636994096;1636994264;1636994307;1636994319	genic	BREEDING	TMV resistance protein N-like			NB-ARC domain	LEUCINE-RICH REPEAT-CONTAINING PROTEIN	FALSE
PA_chr01_G000019	46916	PA_chr01	4033716	snp_46916_PA_chr01:4033716	CpG	4011421	4068670	+	0	G	A	0.0911552	8	PA_chr01:1636993893-1636993893;PA_chr01:1636993936-1636993936;PA_chr01:1636994073-1636994073;PA_chr01:1636994087-1636994087;PA_chr01:1636994096-1636994096;PA_chr01:1636994264-1636994264;PA_chr01:1636994307-1636994307;PA_chr01:1636994319-1636994319	CHG;CpG	PA_chr01	1636993893;1636993936;1636994073;1636994087;1636994096;1636994264;1636994307;1636994319	genic	BREEDING	TMV resistance protein N-like			NB-ARC domain	LEUCINE-RICH REPEAT-CONTAINING PROTEIN	FALSE
PA_chr01_G000019	47257	PA_chr01	4033826	snp_47257_PA_chr01:4033826	CHG	4011421	4068670	+	0				7	PA_chr01:1649666749-1649666749;PA_chr01:1649666769-1649666769;PA_chr01:1649666773-1649666773;PA_chr01:1649666776-1649666776;PA_chr01:1649666806-1649666806;PA_chr01:1649666847-1649666847;PA_chr01:1649666884-1649666884	CHG	PA_chr01	1649666749;1649666769;1649666773;1649666776;1649666806;1649666847;1649666884	genic	BREEDING	TMV resistance protein N-like			NB-ARC domain	LEUCINE-RICH REPEAT-CONTAINING PROTEIN	FALSE
PA_chr01_G000019	1039	PA_chr01	4060761	snp_1039_PA_chr01:4060761	CHG	4011421	4068670	+	0	G	A	0.057971	4	PA_chr01:13672574-13672574;PA_chr01:13672578-13672578;PA_chr01:13672603-13672603;PA_chr01:13672608-13672608	CHG;CpG	PA_chr01	13672574;13672578;13672603;13672608	genic	BREEDING	TMV resistance protein N-like			NB-ARC domain	LEUCINE-RICH REPEAT-CONTAINING PROTEIN	FALSE
PA_chr01_G000019	1039	PA_chr01	4060761	snp_1039_PA_chr01:4060761	CHG	4011421	4068670	+	0	G	A	0.057971	4	PA_chr01:13672574-13672574;PA_chr01:13672578-13672578;PA_chr01:13672603-13672603;PA_chr01:13672608-13672608	CHG;CpG	PA_chr01	13672574;13672578;13672603;13672608	genic	BREEDING	TMV resistance protein N-like			NB-ARC domain	LEUCINE-RICH REPEAT-CONTAINING PROTEIN	FALSE
PA_chr01_G000019	21115	PA_chr01	4033826	snp_21115_PA_chr01:4033826	CHG	4011421	4068670	+	0				4	PA_chr01:708988309-708988309;PA_chr01:708988369-708988369;PA_chr01:708988378-708988378;PA_chr01:708988466-708988466	CHG;CHH;CpG	PA_chr01	708988309;708988369;708988378;708988466	genic	BREEDING	TMV resistance protein N-like			NB-ARC domain	LEUCINE-RICH REPEAT-CONTAINING PROTEIN	FALSE
PA_chr01_G000019	21115	PA_chr01	4033826	snp_21115_PA_chr01:4033826	CHG	4011421	4068670	+	0				4	PA_chr01:708988309-708988309;PA_chr01:708988369-708988369;PA_chr01:708988378-708988378;PA_chr01:708988466-708988466	CHG;CHH;CpG	PA_chr01	708988309;708988369;708988378;708988466	genic	BREEDING	TMV resistance protein N-like			NB-ARC domain	LEUCINE-RICH REPEAT-CONTAINING PROTEIN	FALSE
PA_chr01_G000019	21115	PA_chr01	4033826	snp_21115_PA_chr01:4033826	CHG	4011421	4068670	+	0				4	PA_chr01:708988309-708988309;PA_chr01:708988369-708988369;PA_chr01:708988378-708988378;PA_chr01:708988466-708988466	CHG;CHH;CpG	PA_chr01	708988309;708988369;708988378;708988466	genic	BREEDING	TMV resistance protein N-like			NB-ARC domain	LEUCINE-RICH REPEAT-CONTAINING PROTEIN	FALSE
PA_chr01_G000019	44713	PA_chr01	4060613	snp_44713_PA_chr01:4060613	CHG	4011421	4068670	+	0	G	T	0.0813743	4	PA_chr01:1548323190-1548323190;PA_chr01:1548323217-1548323217;PA_chr01:1548323229-1548323229;PA_chr01:1548323300-1548323300	CHG;CHH	PA_chr01	1548323190;1548323217;1548323229;1548323300	genic	BREEDING	TMV resistance protein N-like			NB-ARC domain	LEUCINE-RICH REPEAT-CONTAINING PROTEIN	FALSE
PA_chr01_G000019	44713	PA_chr01	4060613	snp_44713_PA_chr01:4060613	CHG	4011421	4068670	+	0	G	T	0.0813743	4	PA_chr01:1548323190-1548323190;PA_chr01:1548323217-1548323217;PA_chr01:1548323229-1548323229;PA_chr01:1548323300-1548323300	CHG;CHH	PA_chr01	1548323190;1548323217;1548323229;1548323300	genic	BREEDING	TMV resistance protein N-like			NB-ARC domain	LEUCINE-RICH REPEAT-CONTAINING PROTEIN	FALSE
PA_chr01_G000019	12379	PA_chr01	4033712	snp_12379_PA_chr01:4033712	CHH	4011421	4068670	+	0	A	T	0.0942029	4	PA_chr01:390570903-390570903;PA_chr01:390570905-390570905;PA_chr01:390570906-390570906;PA_chr01:390570912-390570912	CHH	PA_chr01	390570903;390570905;390570906;390570912	genic	BREEDING	TMV resistance protein N-like			NB-ARC domain	LEUCINE-RICH REPEAT-CONTAINING PROTEIN	FALSE
PA_chr01_G000019	21115	PA_chr01	4033826	snp_21115_PA_chr01:4033826	CHH	4011421	4068670	+	0				4	PA_chr01:708988309-708988309;PA_chr01:708988369-708988369;PA_chr01:708988378-708988378;PA_chr01:708988466-708988466	CHG;CHH;CpG	PA_chr01	708988309;708988369;708988378;708988466	genic	BREEDING	TMV resistance protein N-like			NB-ARC domain	LEUCINE-RICH REPEAT-CONTAINING PROTEIN	FALSE
PA_chr01_G000019	21115	PA_chr01	4033826	snp_21115_PA_chr01:4033826	CHH	4011421	4068670	+	0				4	PA_chr01:708988309-708988309;PA_chr01:708988369-708988369;PA_chr01:708988378-708988378;PA_chr01:708988466-708988466	CHG;CHH;CpG	PA_chr01	708988309;708988369;708988378;708988466	genic	BREEDING	TMV resistance protein N-like			NB-ARC domain	LEUCINE-RICH REPEAT-CONTAINING PROTEIN	FALSE
PA_chr01_G000019	21115	PA_chr01	4033826	snp_21115_PA_chr01:4033826	CHH	4011421	4068670	+	0				4	PA_chr01:708988309-708988309;PA_chr01:708988369-708988369;PA_chr01:708988378-708988378;PA_chr01:708988466-708988466	CHG;CHH;CpG	PA_chr01	708988309;708988369;708988378;708988466	genic	BREEDING	TMV resistance protein N-like			NB-ARC domain	LEUCINE-RICH REPEAT-CONTAINING PROTEIN	FALSE
PA_chr01_G000019	44713	PA_chr01	4060613	snp_44713_PA_chr01:4060613	CHH	4011421	4068670	+	0	G	T	0.0813743	4	PA_chr01:1548323190-1548323190;PA_chr01:1548323217-1548323217;PA_chr01:1548323229-1548323229;PA_chr01:1548323300-1548323300	CHG;CHH	PA_chr01	1548323190;1548323217;1548323229;1548323300	genic	BREEDING	TMV resistance protein N-like			NB-ARC domain	LEUCINE-RICH REPEAT-CONTAINING PROTEIN	FALSE
PA_chr01_G000019	44713	PA_chr01	4060613	snp_44713_PA_chr01:4060613	CHH	4011421	4068670	+	0	G	T	0.0813743	4	PA_chr01:1548323190-1548323190;PA_chr01:1548323217-1548323217;PA_chr01:1548323229-1548323229;PA_chr01:1548323300-1548323300	CHG;CHH	PA_chr01	1548323190;1548323217;1548323229;1548323300	genic	BREEDING	TMV resistance protein N-like			NB-ARC domain	LEUCINE-RICH REPEAT-CONTAINING PROTEIN	FALSE
PA_chr01_G000019	1039	PA_chr01	4060761	snp_1039_PA_chr01:4060761	CpG	4011421	4068670	+	0	G	A	0.057971	4	PA_chr01:13672574-13672574;PA_chr01:13672578-13672578;PA_chr01:13672603-13672603;PA_chr01:13672608-13672608	CHG;CpG	PA_chr01	13672574;13672578;13672603;13672608	genic	BREEDING	TMV resistance protein N-like			NB-ARC domain	LEUCINE-RICH REPEAT-CONTAINING PROTEIN	FALSE
PA_chr01_G000019	1039	PA_chr01	4060761	snp_1039_PA_chr01:4060761	CpG	4011421	4068670	+	0	G	A	0.057971	4	PA_chr01:13672574-13672574;PA_chr01:13672578-13672578;PA_chr01:13672603-13672603;PA_chr01:13672608-13672608	CHG;CpG	PA_chr01	13672574;13672578;13672603;13672608	genic	BREEDING	TMV resistance protein N-like			NB-ARC domain	LEUCINE-RICH REPEAT-CONTAINING PROTEIN	FALSE
PA_chr01_G000019	21115	PA_chr01	4033826	snp_21115_PA_chr01:4033826	CpG	4011421	4068670	+	0				4	PA_chr01:708988309-708988309;PA_chr01:708988369-708988369;PA_chr01:708988378-708988378;PA_chr01:708988466-708988466	CHG;CHH;CpG	PA_chr01	708988309;708988369;708988378;708988466	genic	BREEDING	TMV resistance protein N-like			NB-ARC domain	LEUCINE-RICH REPEAT-CONTAINING PROTEIN	FALSE
PA_chr01_G000019	21115	PA_chr01	4033826	snp_21115_PA_chr01:4033826	CpG	4011421	4068670	+	0				4	PA_chr01:708988309-708988309;PA_chr01:708988369-708988369;PA_chr01:708988378-708988378;PA_chr01:708988466-708988466	CHG;CHH;CpG	PA_chr01	708988309;708988369;708988378;708988466	genic	BREEDING	TMV resistance protein N-like			NB-ARC domain	LEUCINE-RICH REPEAT-CONTAINING PROTEIN	FALSE
PA_chr01_G000019	21115	PA_chr01	4033826	snp_21115_PA_chr01:4033826	CpG	4011421	4068670	+	0				4	PA_chr01:708988309-708988309;PA_chr01:708988369-708988369;PA_chr01:708988378-708988378;PA_chr01:708988466-708988466	CHG;CHH;CpG	PA_chr01	708988309;708988369;708988378;708988466	genic	BREEDING	TMV resistance protein N-like			NB-ARC domain	LEUCINE-RICH REPEAT-CONTAINING PROTEIN	FALSE
PA_chr01_G000019	11973	PA_chr01	4033881	snp_11973_PA_chr01:4033881	CHG	4011421	4068670	+	0	C	T	0.0732143	3	PA_chr01:379873615-379873615;PA_chr01:379873616-379873616;PA_chr01:379922911-379922911	CHG;CHH;CpG	PA_chr01	379873615;379873616;379922911	genic	BREEDING	TMV resistance protein N-like			NB-ARC domain	LEUCINE-RICH REPEAT-CONTAINING PROTEIN	FALSE
PA_chr01_G000019	11973	PA_chr01	4033881	snp_11973_PA_chr01:4033881	CHG	4011421	4068670	+	0	C	T	0.0732143	3	PA_chr01:379873615-379873615;PA_chr01:379873616-379873616;PA_chr01:379922911-379922911	CHG;CHH;CpG	PA_chr01	379873615;379873616;379922911	genic	BREEDING	TMV resistance protein N-like			NB-ARC domain	LEUCINE-RICH REPEAT-CONTAINING PROTEIN	FALSE
PA_chr01_G000019	11973	PA_chr01	4033881	snp_11973_PA_chr01:4033881	CHG	4011421	4068670	+	0	C	T	0.0732143	3	PA_chr01:379873615-379873615;PA_chr01:379873616-379873616;PA_chr01:379922911-379922911	CHG;CHH;CpG	PA_chr01	379873615;379873616;379922911	genic	BREEDING	TMV resistance protein N-like			NB-ARC domain	LEUCINE-RICH REPEAT-CONTAINING PROTEIN	FALSE
PA_chr01_G000019	26377	PA_chr01	4033716	snp_26377_PA_chr01:4033716	CHG	4011421	4068670	+	0	G	A	0.0911552	3	PA_chr01:849587385-849587385;PA_chr01:849658910-849658910;PA_chr01:849658933-849658933	CHG	PA_chr01	849587385;849658910;849658933	genic	BREEDING	TMV resistance protein N-like			NB-ARC domain	LEUCINE-RICH REPEAT-CONTAINING PROTEIN	FALSE
PA_chr01_G000019	26378	PA_chr01	4033736	snp_26378_PA_chr01:4033736	CHG	4011421	4068670	+	0				3	PA_chr01:849587385-849587385;PA_chr01:849658910-849658910;PA_chr01:849658933-849658933	CHG	PA_chr01	849587385;849658910;849658933	genic	BREEDING	TMV resistance protein N-like			NB-ARC domain	LEUCINE-RICH REPEAT-CONTAINING PROTEIN	FALSE
PA_chr01_G000019	27309	PA_chr01	4033818	snp_27309_PA_chr01:4033818	CHG	4011421	4068670	+	0	T	C	0.128546	3	PA_chr01:877705327-877705327;PA_chr01:877705494-877705494;PA_chr01:877705560-877705560	CHG;CHH	PA_chr01	877705327;877705494;877705560	genic	BREEDING	TMV resistance protein N-like			NB-ARC domain	LEUCINE-RICH REPEAT-CONTAINING PROTEIN	FALSE
PA_chr01_G000019	27309	PA_chr01	4033818	snp_27309_PA_chr01:4033818	CHG	4011421	4068670	+	0	T	C	0.128546	3	PA_chr01:877705327-877705327;PA_chr01:877705494-877705494;PA_chr01:877705560-877705560	CHG;CHH	PA_chr01	877705327;877705494;877705560	genic	BREEDING	TMV resistance protein N-like			NB-ARC domain	LEUCINE-RICH REPEAT-CONTAINING PROTEIN	FALSE
PA_chr01_G000019	27326	PA_chr01	4060710	snp_27326_PA_chr01:4060710	CHG	4011421	4068670	+	0	A	G	0.164298	3	PA_chr01:877705494-877705494;PA_chr01:877705497-877705497;PA_chr01:877705518-877705518	CHG;CHH;CpG	PA_chr01	877705494;877705497;877705518	genic	BREEDING	TMV resistance protein N-like			NB-ARC domain	LEUCINE-RICH REPEAT-CONTAINING PROTEIN	FALSE
PA_chr01_G000019	27326	PA_chr01	4060710	snp_27326_PA_chr01:4060710	CHG	4011421	4068670	+	0	A	G	0.164298	3	PA_chr01:877705494-877705494;PA_chr01:877705497-877705497;PA_chr01:877705518-877705518	CHG;CHH;CpG	PA_chr01	877705494;877705497;877705518	genic	BREEDING	TMV resistance protein N-like			NB-ARC domain	LEUCINE-RICH REPEAT-CONTAINING PROTEIN	FALSE
PA_chr01_G000019	27326	PA_chr01	4060710	snp_27326_PA_chr01:4060710	CHG	4011421	4068670	+	0	A	G	0.164298	3	PA_chr01:877705494-877705494;PA_chr01:877705497-877705497;PA_chr01:877705518-877705518	CHG;CHH;CpG	PA_chr01	877705494;877705497;877705518	genic	BREEDING	TMV resistance protein N-like			NB-ARC domain	LEUCINE-RICH REPEAT-CONTAINING PROTEIN	FALSE
PA_chr01_G000019	43985	PA_chr01	4033833	snp_43985_PA_chr01:4033833	CHG	4011421	4068670	+	0	C	T	0.0879219	3	PA_chr01:1522867550-1522867550;PA_chr01:1522867556-1522867556;PA_chr01:1522867579-1522867579	CHG	PA_chr01	1522867550;1522867556;1522867579	genic	BREEDING	TMV resistance protein N-like			NB-ARC domain	LEUCINE-RICH REPEAT-CONTAINING PROTEIN	FALSE
PA_chr01_G000019	44710	PA_chr01	4060585	snp_44710_PA_chr01:4060585	CHG	4011421	4068670	+	0	G	C	0.0741758	3	PA_chr01:1548323190-1548323190;PA_chr01:1548323229-1548323229;PA_chr01:1548323300-1548323300	CHG;CHH	PA_chr01	1548323190;1548323229;1548323300	genic	BREEDING	TMV resistance protein N-like			NB-ARC domain	LEUCINE-RICH REPEAT-CONTAINING PROTEIN	FALSE
PA_chr01_G000019	44710	PA_chr01	4060585	snp_44710_PA_chr01:4060585	CHG	4011421	4068670	+	0	G	C	0.0741758	3	PA_chr01:1548323190-1548323190;PA_chr01:1548323229-1548323229;PA_chr01:1548323300-1548323300	CHG;CHH	PA_chr01	1548323190;1548323229;1548323300	genic	BREEDING	TMV resistance protein N-like			NB-ARC domain	LEUCINE-RICH REPEAT-CONTAINING PROTEIN	FALSE
PA_chr01_G000019	45957	PA_chr01	4033818	snp_45957_PA_chr01:4033818	CHG	4011421	4068670	+	0	T	C	0.128546	3	PA_chr01:1606939590-1606939590;PA_chr01:1606939676-1606939676;PA_chr01:1606939691-1606939691	CHG	PA_chr01	1606939590;1606939676;1606939691	genic	BREEDING	TMV resistance protein N-like			NB-ARC domain	LEUCINE-RICH REPEAT-CONTAINING PROTEIN	FALSE
PA_chr01_G000019	11973	PA_chr01	4033881	snp_11973_PA_chr01:4033881	CHH	4011421	4068670	+	0	C	T	0.0732143	3	PA_chr01:379873615-379873615;PA_chr01:379873616-379873616;PA_chr01:379922911-379922911	CHG;CHH;CpG	PA_chr01	379873615;379873616;379922911	genic	BREEDING	TMV resistance protein N-like			NB-ARC domain	LEUCINE-RICH REPEAT-CONTAINING PROTEIN	FALSE
PA_chr01_G000019	11973	PA_chr01	4033881	snp_11973_PA_chr01:4033881	CHH	4011421	4068670	+	0	C	T	0.0732143	3	PA_chr01:379873615-379873615;PA_chr01:379873616-379873616;PA_chr01:379922911-379922911	CHG;CHH;CpG	PA_chr01	379873615;379873616;379922911	genic	BREEDING	TMV resistance protein N-like			NB-ARC domain	LEUCINE-RICH REPEAT-CONTAINING PROTEIN	FALSE
PA_chr01_G000019	11973	PA_chr01	4033881	snp_11973_PA_chr01:4033881	CHH	4011421	4068670	+	0	C	T	0.0732143	3	PA_chr01:379873615-379873615;PA_chr01:379873616-379873616;PA_chr01:379922911-379922911	CHG;CHH;CpG	PA_chr01	379873615;379873616;379922911	genic	BREEDING	TMV resistance protein N-like			NB-ARC domain	LEUCINE-RICH REPEAT-CONTAINING PROTEIN	FALSE
PA_chr01_G000019	21121	PA_chr01	4033889	snp_21121_PA_chr01:4033889	CHH	4011421	4068670	+	0				3	PA_chr01:708988329-708988329;PA_chr01:708988569-708988569;PA_chr01:708988573-708988573	CHH;CpG	PA_chr01	708988329;708988569;708988573	genic	BREEDING	TMV resistance protein N-like			NB-ARC domain	LEUCINE-RICH REPEAT-CONTAINING PROTEIN	FALSE
PA_chr01_G000019	21121	PA_chr01	4033889	snp_21121_PA_chr01:4033889	CHH	4011421	4068670	+	0				3	PA_chr01:708988329-708988329;PA_chr01:708988569-708988569;PA_chr01:708988573-708988573	CHH;CpG	PA_chr01	708988329;708988569;708988573	genic	BREEDING	TMV resistance protein N-like			NB-ARC domain	LEUCINE-RICH REPEAT-CONTAINING PROTEIN	FALSE
PA_chr01_G000019	27309	PA_chr01	4033818	snp_27309_PA_chr01:4033818	CHH	4011421	4068670	+	0	T	C	0.128546	3	PA_chr01:877705327-877705327;PA_chr01:877705494-877705494;PA_chr01:877705560-877705560	CHG;CHH	PA_chr01	877705327;877705494;877705560	genic	BREEDING	TMV resistance protein N-like			NB-ARC domain	LEUCINE-RICH REPEAT-CONTAINING PROTEIN	FALSE
PA_chr01_G000019	27309	PA_chr01	4033818	snp_27309_PA_chr01:4033818	CHH	4011421	4068670	+	0	T	C	0.128546	3	PA_chr01:877705327-877705327;PA_chr01:877705494-877705494;PA_chr01:877705560-877705560	CHG;CHH	PA_chr01	877705327;877705494;877705560	genic	BREEDING	TMV resistance protein N-like			NB-ARC domain	LEUCINE-RICH REPEAT-CONTAINING PROTEIN	FALSE
PA_chr01_G000019	27324	PA_chr01	4060613	snp_27324_PA_chr01:4060613	CHH	4011421	4068670	+	0	G	T	0.0813743	3	PA_chr01:877705497-877705497;PA_chr01:877705503-877705503;PA_chr01:877705518-877705518	CHH;CpG	PA_chr01	877705497;877705503;877705518	genic	BREEDING	TMV resistance protein N-like			NB-ARC domain	LEUCINE-RICH REPEAT-CONTAINING PROTEIN	FALSE
PA_chr01_G000019	27324	PA_chr01	4060613	snp_27324_PA_chr01:4060613	CHH	4011421	4068670	+	0	G	T	0.0813743	3	PA_chr01:877705497-877705497;PA_chr01:877705503-877705503;PA_chr01:877705518-877705518	CHH;CpG	PA_chr01	877705497;877705503;877705518	genic	BREEDING	TMV resistance protein N-like			NB-ARC domain	LEUCINE-RICH REPEAT-CONTAINING PROTEIN	FALSE
PA_chr01_G000019	27326	PA_chr01	4060710	snp_27326_PA_chr01:4060710	CHH	4011421	4068670	+	0	A	G	0.164298	3	PA_chr01:877705494-877705494;PA_chr01:877705497-877705497;PA_chr01:877705518-877705518	CHG;CHH;CpG	PA_chr01	877705494;877705497;877705518	genic	BREEDING	TMV resistance protein N-like			NB-ARC domain	LEUCINE-RICH REPEAT-CONTAINING PROTEIN	FALSE
PA_chr01_G000019	27326	PA_chr01	4060710	snp_27326_PA_chr01:4060710	CHH	4011421	4068670	+	0	A	G	0.164298	3	PA_chr01:877705494-877705494;PA_chr01:877705497-877705497;PA_chr01:877705518-877705518	CHG;CHH;CpG	PA_chr01	877705494;877705497;877705518	genic	BREEDING	TMV resistance protein N-like			NB-ARC domain	LEUCINE-RICH REPEAT-CONTAINING PROTEIN	FALSE
PA_chr01_G000019	27326	PA_chr01	4060710	snp_27326_PA_chr01:4060710	CHH	4011421	4068670	+	0	A	G	0.164298	3	PA_chr01:877705494-877705494;PA_chr01:877705497-877705497;PA_chr01:877705518-877705518	CHG;CHH;CpG	PA_chr01	877705494;877705497;877705518	genic	BREEDING	TMV resistance protein N-like			NB-ARC domain	LEUCINE-RICH REPEAT-CONTAINING PROTEIN	FALSE
PA_chr01_G000019	44710	PA_chr01	4060585	snp_44710_PA_chr01:4060585	CHH	4011421	4068670	+	0	G	C	0.0741758	3	PA_chr01:1548323190-1548323190;PA_chr01:1548323229-1548323229;PA_chr01:1548323300-1548323300	CHG;CHH	PA_chr01	1548323190;1548323229;1548323300	genic	BREEDING	TMV resistance protein N-like			NB-ARC domain	LEUCINE-RICH REPEAT-CONTAINING PROTEIN	FALSE
PA_chr01_G000019	44710	PA_chr01	4060585	snp_44710_PA_chr01:4060585	CHH	4011421	4068670	+	0	G	C	0.0741758	3	PA_chr01:1548323190-1548323190;PA_chr01:1548323229-1548323229;PA_chr01:1548323300-1548323300	CHG;CHH	PA_chr01	1548323190;1548323229;1548323300	genic	BREEDING	TMV resistance protein N-like			NB-ARC domain	LEUCINE-RICH REPEAT-CONTAINING PROTEIN	FALSE
PA_chr01_G000019	11973	PA_chr01	4033881	snp_11973_PA_chr01:4033881	CpG	4011421	4068670	+	0	C	T	0.0732143	3	PA_chr01:379873615-379873615;PA_chr01:379873616-379873616;PA_chr01:379922911-379922911	CHG;CHH;CpG	PA_chr01	379873615;379873616;379922911	genic	BREEDING	TMV resistance protein N-like			NB-ARC domain	LEUCINE-RICH REPEAT-CONTAINING PROTEIN	FALSE
PA_chr01_G000019	11973	PA_chr01	4033881	snp_11973_PA_chr01:4033881	CpG	4011421	4068670	+	0	C	T	0.0732143	3	PA_chr01:379873615-379873615;PA_chr01:379873616-379873616;PA_chr01:379922911-379922911	CHG;CHH;CpG	PA_chr01	379873615;379873616;379922911	genic	BREEDING	TMV resistance protein N-like			NB-ARC domain	LEUCINE-RICH REPEAT-CONTAINING PROTEIN	FALSE
PA_chr01_G000019	11973	PA_chr01	4033881	snp_11973_PA_chr01:4033881	CpG	4011421	4068670	+	0	C	T	0.0732143	3	PA_chr01:379873615-379873615;PA_chr01:379873616-379873616;PA_chr01:379922911-379922911	CHG;CHH;CpG	PA_chr01	379873615;379873616;379922911	genic	BREEDING	TMV resistance protein N-like			NB-ARC domain	LEUCINE-RICH REPEAT-CONTAINING PROTEIN	FALSE
PA_chr01_G000019	21121	PA_chr01	4033889	snp_21121_PA_chr01:4033889	CpG	4011421	4068670	+	0				3	PA_chr01:708988329-708988329;PA_chr01:708988569-708988569;PA_chr01:708988573-708988573	CHH;CpG	PA_chr01	708988329;708988569;708988573	genic	BREEDING	TMV resistance protein N-like			NB-ARC domain	LEUCINE-RICH REPEAT-CONTAINING PROTEIN	FALSE
PA_chr01_G000019	21121	PA_chr01	4033889	snp_21121_PA_chr01:4033889	CpG	4011421	4068670	+	0				3	PA_chr01:708988329-708988329;PA_chr01:708988569-708988569;PA_chr01:708988573-708988573	CHH;CpG	PA_chr01	708988329;708988569;708988573	genic	BREEDING	TMV resistance protein N-like			NB-ARC domain	LEUCINE-RICH REPEAT-CONTAINING PROTEIN	FALSE
PA_chr01_G000019	24969	PA_chr01	4033817	snp_24969_PA_chr01:4033817	CpG	4011421	4068670	+	0	A	G	0.140071	3	PA_chr01:797214980-797214980;PA_chr01:797214988-797214988;PA_chr01:797215111-797215111	CpG	PA_chr01	797214980;797214988;797215111	genic	BREEDING	TMV resistance protein N-like			NB-ARC domain	LEUCINE-RICH REPEAT-CONTAINING PROTEIN	FALSE
PA_chr01_G000019	24970	PA_chr01	4033818	snp_24970_PA_chr01:4033818	CpG	4011421	4068670	+	0	T	C	0.128546	3	PA_chr01:797214980-797214980;PA_chr01:797214988-797214988;PA_chr01:797215111-797215111	CpG	PA_chr01	797214980;797214988;797215111	genic	BREEDING	TMV resistance protein N-like			NB-ARC domain	LEUCINE-RICH REPEAT-CONTAINING PROTEIN	FALSE
PA_chr01_G000019	27324	PA_chr01	4060613	snp_27324_PA_chr01:4060613	CpG	4011421	4068670	+	0	G	T	0.0813743	3	PA_chr01:877705497-877705497;PA_chr01:877705503-877705503;PA_chr01:877705518-877705518	CHH;CpG	PA_chr01	877705497;877705503;877705518	genic	BREEDING	TMV resistance protein N-like			NB-ARC domain	LEUCINE-RICH REPEAT-CONTAINING PROTEIN	FALSE
PA_chr01_G000019	27324	PA_chr01	4060613	snp_27324_PA_chr01:4060613	CpG	4011421	4068670	+	0	G	T	0.0813743	3	PA_chr01:877705497-877705497;PA_chr01:877705503-877705503;PA_chr01:877705518-877705518	CHH;CpG	PA_chr01	877705497;877705503;877705518	genic	BREEDING	TMV resistance protein N-like			NB-ARC domain	LEUCINE-RICH REPEAT-CONTAINING PROTEIN	FALSE
PA_chr01_G000019	27326	PA_chr01	4060710	snp_27326_PA_chr01:4060710	CpG	4011421	4068670	+	0	A	G	0.164298	3	PA_chr01:877705494-877705494;PA_chr01:877705497-877705497;PA_chr01:877705518-877705518	CHG;CHH;CpG	PA_chr01	877705494;877705497;877705518	genic	BREEDING	TMV resistance protein N-like			NB-ARC domain	LEUCINE-RICH REPEAT-CONTAINING PROTEIN	FALSE
PA_chr01_G000019	27326	PA_chr01	4060710	snp_27326_PA_chr01:4060710	CpG	4011421	4068670	+	0	A	G	0.164298	3	PA_chr01:877705494-877705494;PA_chr01:877705497-877705497;PA_chr01:877705518-877705518	CHG;CHH;CpG	PA_chr01	877705494;877705497;877705518	genic	BREEDING	TMV resistance protein N-like			NB-ARC domain	LEUCINE-RICH REPEAT-CONTAINING PROTEIN	FALSE
PA_chr01_G000019	27326	PA_chr01	4060710	snp_27326_PA_chr01:4060710	CpG	4011421	4068670	+	0	A	G	0.164298	3	PA_chr01:877705494-877705494;PA_chr01:877705497-877705497;PA_chr01:877705518-877705518	CHG;CHH;CpG	PA_chr01	877705494;877705497;877705518	genic	BREEDING	TMV resistance protein N-like			NB-ARC domain	LEUCINE-RICH REPEAT-CONTAINING PROTEIN	FALSE
PA_chr01_G000019	10363	PA_chr01	4033817	snp_10363_PA_chr01:4033817	CHG	4011421	4068670	+	0	A	G	0.140071	2	PA_chr01:339227670-339227670;PA_chr01:339227745-339227745	CHG	PA_chr01	339227670;339227745	genic	BREEDING	TMV resistance protein N-like			NB-ARC domain	LEUCINE-RICH REPEAT-CONTAINING PROTEIN	FALSE
PA_chr01_G000019	23689	PA_chr01	4033800	snp_23689_PA_chr01:4033800	CHG	4011421	4068670	+	0	C	T	0.129204	2	PA_chr01:768237279-768237279;PA_chr01:768237282-768237282	CHG;CHH	PA_chr01	768237279;768237282	genic	BREEDING	TMV resistance protein N-like			NB-ARC domain	LEUCINE-RICH REPEAT-CONTAINING PROTEIN	FALSE
PA_chr01_G000019	23689	PA_chr01	4033800	snp_23689_PA_chr01:4033800	CHG	4011421	4068670	+	0	C	T	0.129204	2	PA_chr01:768237279-768237279;PA_chr01:768237282-768237282	CHG;CHH	PA_chr01	768237279;768237282	genic	BREEDING	TMV resistance protein N-like			NB-ARC domain	LEUCINE-RICH REPEAT-CONTAINING PROTEIN	FALSE
PA_chr01_G000019	23690	PA_chr01	4033802	snp_23690_PA_chr01:4033802	CHG	4011421	4068670	+	0	G	A	0.0627209	2	PA_chr01:768237279-768237279;PA_chr01:768237282-768237282	CHG;CHH	PA_chr01	768237279;768237282	genic	BREEDING	TMV resistance protein N-like			NB-ARC domain	LEUCINE-RICH REPEAT-CONTAINING PROTEIN	FALSE
PA_chr01_G000019	23690	PA_chr01	4033802	snp_23690_PA_chr01:4033802	CHG	4011421	4068670	+	0	G	A	0.0627209	2	PA_chr01:768237279-768237279;PA_chr01:768237282-768237282	CHG;CHH	PA_chr01	768237279;768237282	genic	BREEDING	TMV resistance protein N-like			NB-ARC domain	LEUCINE-RICH REPEAT-CONTAINING PROTEIN	FALSE
PA_chr01_G000019	23703	PA_chr01	4033881	snp_23703_PA_chr01:4033881	CHG	4011421	4068670	+	0	C	T	0.0732143	2	PA_chr01:768237279-768237279;PA_chr01:768237282-768237282	CHG;CHH	PA_chr01	768237279;768237282	genic	BREEDING	TMV resistance protein N-like			NB-ARC domain	LEUCINE-RICH REPEAT-CONTAINING PROTEIN	FALSE
PA_chr01_G000019	23703	PA_chr01	4033881	snp_23703_PA_chr01:4033881	CHG	4011421	4068670	+	0	C	T	0.0732143	2	PA_chr01:768237279-768237279;PA_chr01:768237282-768237282	CHG;CHH	PA_chr01	768237279;768237282	genic	BREEDING	TMV resistance protein N-like			NB-ARC domain	LEUCINE-RICH REPEAT-CONTAINING PROTEIN	FALSE
PA_chr01_G000019	23705	PA_chr01	4033912	snp_23705_PA_chr01:4033912	CHG	4011421	4068670	+	0				2	PA_chr01:768237271-768237271;PA_chr01:768237279-768237279	CHG;CHH	PA_chr01	768237271;768237279	genic	BREEDING	TMV resistance protein N-like			NB-ARC domain	LEUCINE-RICH REPEAT-CONTAINING PROTEIN	FALSE
PA_chr01_G000019	23705	PA_chr01	4033912	snp_23705_PA_chr01:4033912	CHG	4011421	4068670	+	0				2	PA_chr01:768237271-768237271;PA_chr01:768237279-768237279	CHG;CHH	PA_chr01	768237271;768237279	genic	BREEDING	TMV resistance protein N-like			NB-ARC domain	LEUCINE-RICH REPEAT-CONTAINING PROTEIN	FALSE
PA_chr01_G000019	24783	PA_chr01	4033716	snp_24783_PA_chr01:4033716	CHG	4011421	4068670	+	0	G	A	0.0911552	2	PA_chr01:794654923-794654923;PA_chr01:794654938-794654938	CHG	PA_chr01	794654923;794654938	genic	BREEDING	TMV resistance protein N-like			NB-ARC domain	LEUCINE-RICH REPEAT-CONTAINING PROTEIN	FALSE
PA_chr01_G000019	24788	PA_chr01	4033763	snp_24788_PA_chr01:4033763	CHG	4011421	4068670	+	0	G	A	0.0761062	2	PA_chr01:794654923-794654923;PA_chr01:794654938-794654938	CHG	PA_chr01	794654923;794654938	genic	BREEDING	TMV resistance protein N-like			NB-ARC domain	LEUCINE-RICH REPEAT-CONTAINING PROTEIN	FALSE
PA_chr01_G000019	27310	PA_chr01	4033824	snp_27310_PA_chr01:4033824	CHG	4011421	4068670	+	0	T	C	0.44573	2	PA_chr01:877705330-877705330;PA_chr01:877705392-877705392	CHG	PA_chr01	877705330;877705392	genic	BREEDING	TMV resistance protein N-like			NB-ARC domain	LEUCINE-RICH REPEAT-CONTAINING PROTEIN	FALSE
PA_chr01_G000019	27314	PA_chr01	4033848	snp_27314_PA_chr01:4033848	CHG	4011421	4068670	+	0	T	C	0.176732	2	PA_chr01:877705327-877705327;PA_chr01:877705560-877705560	CHG;CHH	PA_chr01	877705327;877705560	genic	BREEDING	TMV resistance protein N-like			NB-ARC domain	LEUCINE-RICH REPEAT-CONTAINING PROTEIN	FALSE
PA_chr01_G000019	27314	PA_chr01	4033848	snp_27314_PA_chr01:4033848	CHG	4011421	4068670	+	0	T	C	0.176732	2	PA_chr01:877705327-877705327;PA_chr01:877705560-877705560	CHG;CHH	PA_chr01	877705327;877705560	genic	BREEDING	TMV resistance protein N-like			NB-ARC domain	LEUCINE-RICH REPEAT-CONTAINING PROTEIN	FALSE
PA_chr01_G000019	27319	PA_chr01	4033920	snp_27319_PA_chr01:4033920	CHG	4011421	4068670	+	0				2	PA_chr01:877705330-877705330;PA_chr01:877705392-877705392	CHG	PA_chr01	877705330;877705392	genic	BREEDING	TMV resistance protein N-like			NB-ARC domain	LEUCINE-RICH REPEAT-CONTAINING PROTEIN	FALSE
PA_chr01_G000019	27323	PA_chr01	4060605	snp_27323_PA_chr01:4060605	CHG	4011421	4068670	+	0				2	PA_chr01:877705330-877705330;PA_chr01:877705392-877705392	CHG	PA_chr01	877705330;877705392	genic	BREEDING	TMV resistance protein N-like			NB-ARC domain	LEUCINE-RICH REPEAT-CONTAINING PROTEIN	FALSE
PA_chr01_G000019	41677	PA_chr01	4033800	snp_41677_PA_chr01:4033800	CHG	4011421	4068670	+	0	C	T	0.129204	2	PA_chr01:1434369841-1434369841;PA_chr01:1434369890-1434369890	CHG	PA_chr01	1434369841;1434369890	genic	BREEDING	TMV resistance protein N-like			NB-ARC domain	LEUCINE-RICH REPEAT-CONTAINING PROTEIN	FALSE
PA_chr01_G000019	41685	PA_chr01	4033824	snp_41685_PA_chr01:4033824	CHG	4011421	4068670	+	0	T	C	0.44573	2	PA_chr01:1434369841-1434369841;PA_chr01:1434369890-1434369890	CHG	PA_chr01	1434369841;1434369890	genic	BREEDING	TMV resistance protein N-like			NB-ARC domain	LEUCINE-RICH REPEAT-CONTAINING PROTEIN	FALSE
PA_chr01_G000019	43991	PA_chr01	4033920	snp_43991_PA_chr01:4033920	CHG	4011421	4068670	+	0				2	PA_chr01:1522867556-1522867556;PA_chr01:1522867579-1522867579	CHG	PA_chr01	1522867556;1522867579	genic	BREEDING	TMV resistance protein N-like			NB-ARC domain	LEUCINE-RICH REPEAT-CONTAINING PROTEIN	FALSE
PA_chr01_G000019	43993	PA_chr01	4060585	snp_43993_PA_chr01:4060585	CHG	4011421	4068670	+	0	G	C	0.0741758	2	PA_chr01:1522867556-1522867556;PA_chr01:1522867579-1522867579	CHG	PA_chr01	1522867556;1522867579	genic	BREEDING	TMV resistance protein N-like			NB-ARC domain	LEUCINE-RICH REPEAT-CONTAINING PROTEIN	FALSE
PA_chr01_G000019	44518	PA_chr01	4033833	snp_44518_PA_chr01:4033833	CHG	4011421	4068670	+	0	C	T	0.0879219	2	PA_chr01:1536069748-1536069748;PA_chr01:1536069792-1536069792	CHG	PA_chr01	1536069748;1536069792	genic	BREEDING	TMV resistance protein N-like			NB-ARC domain	LEUCINE-RICH REPEAT-CONTAINING PROTEIN	FALSE
PA_chr01_G000019	46655	PA_chr01	4033920	snp_46655_PA_chr01:4033920	CHG	4011421	4068670	+	0				2	PA_chr01:1631361603-1631361603;PA_chr01:1631361604-1631361604	CHG;CpG	PA_chr01	1631361603;1631361604	genic	BREEDING	TMV resistance protein N-like			NB-ARC domain	LEUCINE-RICH REPEAT-CONTAINING PROTEIN	FALSE
PA_chr01_G000019	46655	PA_chr01	4033920	snp_46655_PA_chr01:4033920	CHG	4011421	4068670	+	0				2	PA_chr01:1631361603-1631361603;PA_chr01:1631361604-1631361604	CHG;CpG	PA_chr01	1631361603;1631361604	genic	BREEDING	TMV resistance protein N-like			NB-ARC domain	LEUCINE-RICH REPEAT-CONTAINING PROTEIN	FALSE
PA_chr01_G000019	8650	PA_chr01	4033700	snp_8650_PA_chr01:4033700	CHG	4011421	4068670	+	0				2	PA_chr01:257697079-257697079;PA_chr01:257697126-257697126	CHG	PA_chr01	257697079;257697126	genic	BREEDING	TMV resistance protein N-like			NB-ARC domain	LEUCINE-RICH REPEAT-CONTAINING PROTEIN	FALSE
PA_chr01_G000019	11974	PA_chr01	4033889	snp_11974_PA_chr01:4033889	CHH	4011421	4068670	+	0				2	PA_chr01:379873616-379873616;PA_chr01:379922911-379922911	CHH;CpG	PA_chr01	379873616;379922911	genic	BREEDING	TMV resistance protein N-like			NB-ARC domain	LEUCINE-RICH REPEAT-CONTAINING PROTEIN	FALSE
PA_chr01_G000019	11974	PA_chr01	4033889	snp_11974_PA_chr01:4033889	CHH	4011421	4068670	+	0				2	PA_chr01:379873616-379873616;PA_chr01:379922911-379922911	CHH;CpG	PA_chr01	379873616;379922911	genic	BREEDING	TMV resistance protein N-like			NB-ARC domain	LEUCINE-RICH REPEAT-CONTAINING PROTEIN	FALSE
PA_chr01_G000019	16380	PA_chr01	4033700	snp_16380_PA_chr01:4033700	CHH	4011421	4068670	+	0				2	PA_chr01:522246314-522246314;PA_chr01:522249794-522249794	CHH	PA_chr01	522246314;522249794	genic	BREEDING	TMV resistance protein N-like			NB-ARC domain	LEUCINE-RICH REPEAT-CONTAINING PROTEIN	FALSE
PA_chr01_G000019	21109	PA_chr01	4033811	snp_21109_PA_chr01:4033811	CHH	4011421	4068670	+	0				2	PA_chr01:708988452-708988452;PA_chr01:708988569-708988569	CHH;CpG	PA_chr01	708988452;708988569	genic	BREEDING	TMV resistance protein N-like			NB-ARC domain	LEUCINE-RICH REPEAT-CONTAINING PROTEIN	FALSE
PA_chr01_G000019	21109	PA_chr01	4033811	snp_21109_PA_chr01:4033811	CHH	4011421	4068670	+	0				2	PA_chr01:708988452-708988452;PA_chr01:708988569-708988569	CHH;CpG	PA_chr01	708988452;708988569	genic	BREEDING	TMV resistance protein N-like			NB-ARC domain	LEUCINE-RICH REPEAT-CONTAINING PROTEIN	FALSE
PA_chr01_G000019	21118	PA_chr01	4033848	snp_21118_PA_chr01:4033848	CHH	4011421	4068670	+	0	T	C	0.176732	2	PA_chr01:708988548-708988548;PA_chr01:708988549-708988549	CHH	PA_chr01	708988548;708988549	genic	BREEDING	TMV resistance protein N-like			NB-ARC domain	LEUCINE-RICH REPEAT-CONTAINING PROTEIN	FALSE
PA_chr01_G000019	21120	PA_chr01	4033881	snp_21120_PA_chr01:4033881	CHH	4011421	4068670	+	0	C	T	0.0732143	2	PA_chr01:708988452-708988452;PA_chr01:708988569-708988569	CHH;CpG	PA_chr01	708988452;708988569	genic	BREEDING	TMV resistance protein N-like			NB-ARC domain	LEUCINE-RICH REPEAT-CONTAINING PROTEIN	FALSE
PA_chr01_G000019	21120	PA_chr01	4033881	snp_21120_PA_chr01:4033881	CHH	4011421	4068670	+	0	C	T	0.0732143	2	PA_chr01:708988452-708988452;PA_chr01:708988569-708988569	CHH;CpG	PA_chr01	708988452;708988569	genic	BREEDING	TMV resistance protein N-like			NB-ARC domain	LEUCINE-RICH REPEAT-CONTAINING PROTEIN	FALSE
PA_chr01_G000019	21125	PA_chr01	4060585	snp_21125_PA_chr01:4060585	CHH	4011421	4068670	+	0	G	C	0.0741758	2	PA_chr01:708988329-708988329;PA_chr01:708988573-708988573	CHH	PA_chr01	708988329;708988573	genic	BREEDING	TMV resistance protein N-like			NB-ARC domain	LEUCINE-RICH REPEAT-CONTAINING PROTEIN	FALSE
PA_chr01_G000019	23689	PA_chr01	4033800	snp_23689_PA_chr01:4033800	CHH	4011421	4068670	+	0	C	T	0.129204	2	PA_chr01:768237279-768237279;PA_chr01:768237282-768237282	CHG;CHH	PA_chr01	768237279;768237282	genic	BREEDING	TMV resistance protein N-like			NB-ARC domain	LEUCINE-RICH REPEAT-CONTAINING PROTEIN	FALSE
PA_chr01_G000019	23689	PA_chr01	4033800	snp_23689_PA_chr01:4033800	CHH	4011421	4068670	+	0	C	T	0.129204	2	PA_chr01:768237279-768237279;PA_chr01:768237282-768237282	CHG;CHH	PA_chr01	768237279;768237282	genic	BREEDING	TMV resistance protein N-like			NB-ARC domain	LEUCINE-RICH REPEAT-CONTAINING PROTEIN	FALSE
PA_chr01_G000019	23690	PA_chr01	4033802	snp_23690_PA_chr01:4033802	CHH	4011421	4068670	+	0	G	A	0.0627209	2	PA_chr01:768237279-768237279;PA_chr01:768237282-768237282	CHG;CHH	PA_chr01	768237279;768237282	genic	BREEDING	TMV resistance protein N-like			NB-ARC domain	LEUCINE-RICH REPEAT-CONTAINING PROTEIN	FALSE
PA_chr01_G000019	23690	PA_chr01	4033802	snp_23690_PA_chr01:4033802	CHH	4011421	4068670	+	0	G	A	0.0627209	2	PA_chr01:768237279-768237279;PA_chr01:768237282-768237282	CHG;CHH	PA_chr01	768237279;768237282	genic	BREEDING	TMV resistance protein N-like			NB-ARC domain	LEUCINE-RICH REPEAT-CONTAINING PROTEIN	FALSE
PA_chr01_G000019	23703	PA_chr01	4033881	snp_23703_PA_chr01:4033881	CHH	4011421	4068670	+	0	C	T	0.0732143	2	PA_chr01:768237279-768237279;PA_chr01:768237282-768237282	CHG;CHH	PA_chr01	768237279;768237282	genic	BREEDING	TMV resistance protein N-like			NB-ARC domain	LEUCINE-RICH REPEAT-CONTAINING PROTEIN	FALSE
PA_chr01_G000019	23703	PA_chr01	4033881	snp_23703_PA_chr01:4033881	CHH	4011421	4068670	+	0	C	T	0.0732143	2	PA_chr01:768237279-768237279;PA_chr01:768237282-768237282	CHG;CHH	PA_chr01	768237279;768237282	genic	BREEDING	TMV resistance protein N-like			NB-ARC domain	LEUCINE-RICH REPEAT-CONTAINING PROTEIN	FALSE
PA_chr01_G000019	23705	PA_chr01	4033912	snp_23705_PA_chr01:4033912	CHH	4011421	4068670	+	0				2	PA_chr01:768237271-768237271;PA_chr01:768237279-768237279	CHG;CHH	PA_chr01	768237271;768237279	genic	BREEDING	TMV resistance protein N-like			NB-ARC domain	LEUCINE-RICH REPEAT-CONTAINING PROTEIN	FALSE
PA_chr01_G000019	23705	PA_chr01	4033912	snp_23705_PA_chr01:4033912	CHH	4011421	4068670	+	0				2	PA_chr01:768237271-768237271;PA_chr01:768237279-768237279	CHG;CHH	PA_chr01	768237271;768237279	genic	BREEDING	TMV resistance protein N-like			NB-ARC domain	LEUCINE-RICH REPEAT-CONTAINING PROTEIN	FALSE
PA_chr01_G000019	25785	PA_chr01	4033889	snp_25785_PA_chr01:4033889	CHH	4011421	4068670	+	0				2	PA_chr01:827079433-827079433;PA_chr01:827079469-827079469	CHH;CpG	PA_chr01	827079433;827079469	genic	BREEDING	TMV resistance protein N-like			NB-ARC domain	LEUCINE-RICH REPEAT-CONTAINING PROTEIN	FALSE
PA_chr01_G000019	25785	PA_chr01	4033889	snp_25785_PA_chr01:4033889	CHH	4011421	4068670	+	0				2	PA_chr01:827079433-827079433;PA_chr01:827079469-827079469	CHH;CpG	PA_chr01	827079433;827079469	genic	BREEDING	TMV resistance protein N-like			NB-ARC domain	LEUCINE-RICH REPEAT-CONTAINING PROTEIN	FALSE
PA_chr01_G000019	27314	PA_chr01	4033848	snp_27314_PA_chr01:4033848	CHH	4011421	4068670	+	0	T	C	0.176732	2	PA_chr01:877705327-877705327;PA_chr01:877705560-877705560	CHG;CHH	PA_chr01	877705327;877705560	genic	BREEDING	TMV resistance protein N-like			NB-ARC domain	LEUCINE-RICH REPEAT-CONTAINING PROTEIN	FALSE
PA_chr01_G000019	27314	PA_chr01	4033848	snp_27314_PA_chr01:4033848	CHH	4011421	4068670	+	0	T	C	0.176732	2	PA_chr01:877705327-877705327;PA_chr01:877705560-877705560	CHG;CHH	PA_chr01	877705327;877705560	genic	BREEDING	TMV resistance protein N-like			NB-ARC domain	LEUCINE-RICH REPEAT-CONTAINING PROTEIN	FALSE
PA_chr01_G000019	27327	PA_chr01	4060745	snp_27327_PA_chr01:4060745	CHH	4011421	4068670	+	0	G	A	0.076087	2	PA_chr01:877705497-877705497;PA_chr01:877705518-877705518	CHH;CpG	PA_chr01	877705497;877705518	genic	BREEDING	TMV resistance protein N-like			NB-ARC domain	LEUCINE-RICH REPEAT-CONTAINING PROTEIN	FALSE
PA_chr01_G000019	27327	PA_chr01	4060745	snp_27327_PA_chr01:4060745	CHH	4011421	4068670	+	0	G	A	0.076087	2	PA_chr01:877705497-877705497;PA_chr01:877705518-877705518	CHH;CpG	PA_chr01	877705497;877705518	genic	BREEDING	TMV resistance protein N-like			NB-ARC domain	LEUCINE-RICH REPEAT-CONTAINING PROTEIN	FALSE
PA_chr01_G000019	28040	PA_chr01	4033700	snp_28040_PA_chr01:4033700	CHH	4011421	4068670	+	0				2	PA_chr01:892884847-892884847;PA_chr01:892884895-892884895	CHH	PA_chr01	892884847;892884895	genic	BREEDING	TMV resistance protein N-like			NB-ARC domain	LEUCINE-RICH REPEAT-CONTAINING PROTEIN	FALSE
PA_chr01_G000019	43874	PA_chr01	4033779	snp_43874_PA_chr01:4033779	CHH	4011421	4068670	+	0	G	A	0.167257	2	PA_chr01:1518162697-1518162697;PA_chr01:1518162700-1518162700	CHH	PA_chr01	1518162697;1518162700	genic	BREEDING	TMV resistance protein N-like			NB-ARC domain	LEUCINE-RICH REPEAT-CONTAINING PROTEIN	FALSE
PA_chr01_G000019	8689	PA_chr01	4060761	snp_8689_PA_chr01:4060761	CHH	4011421	4068670	+	0	G	A	0.057971	2	PA_chr01:257696997-257696997;PA_chr01:257697143-257697143	CHH;CpG	PA_chr01	257696997;257697143	genic	BREEDING	TMV resistance protein N-like			NB-ARC domain	LEUCINE-RICH REPEAT-CONTAINING PROTEIN	FALSE
PA_chr01_G000019	8689	PA_chr01	4060761	snp_8689_PA_chr01:4060761	CHH	4011421	4068670	+	0	G	A	0.057971	2	PA_chr01:257696997-257696997;PA_chr01:257697143-257697143	CHH;CpG	PA_chr01	257696997;257697143	genic	BREEDING	TMV resistance protein N-like			NB-ARC domain	LEUCINE-RICH REPEAT-CONTAINING PROTEIN	FALSE
PA_chr01_G000019	1037	PA_chr01	4060746	snp_1037_PA_chr01:4060746	CpG	4011421	4068670	+	0				2	PA_chr01:13672574-13672574;PA_chr01:13672603-13672603	CpG	PA_chr01	13672574;13672603	genic	BREEDING	TMV resistance protein N-like			NB-ARC domain	LEUCINE-RICH REPEAT-CONTAINING PROTEIN	FALSE
PA_chr01_G000019	11974	PA_chr01	4033889	snp_11974_PA_chr01:4033889	CpG	4011421	4068670	+	0				2	PA_chr01:379873616-379873616;PA_chr01:379922911-379922911	CHH;CpG	PA_chr01	379873616;379922911	genic	BREEDING	TMV resistance protein N-like			NB-ARC domain	LEUCINE-RICH REPEAT-CONTAINING PROTEIN	FALSE
PA_chr01_G000019	11974	PA_chr01	4033889	snp_11974_PA_chr01:4033889	CpG	4011421	4068670	+	0				2	PA_chr01:379873616-379873616;PA_chr01:379922911-379922911	CHH;CpG	PA_chr01	379873616;379922911	genic	BREEDING	TMV resistance protein N-like			NB-ARC domain	LEUCINE-RICH REPEAT-CONTAINING PROTEIN	FALSE
PA_chr01_G000019	16128	PA_chr01	4033833	snp_16128_PA_chr01:4033833	CpG	4011421	4068670	+	0	C	T	0.0879219	2	PA_chr01:517134752-517134752;PA_chr01:517134799-517134799	CpG	PA_chr01	517134752;517134799	genic	BREEDING	TMV resistance protein N-like			NB-ARC domain	LEUCINE-RICH REPEAT-CONTAINING PROTEIN	FALSE
PA_chr01_G000019	16132	PA_chr01	4033889	snp_16132_PA_chr01:4033889	CpG	4011421	4068670	+	0				2	PA_chr01:517134752-517134752;PA_chr01:517134799-517134799	CpG	PA_chr01	517134752;517134799	genic	BREEDING	TMV resistance protein N-like			NB-ARC domain	LEUCINE-RICH REPEAT-CONTAINING PROTEIN	FALSE
PA_chr01_G000019	16134	PA_chr01	4033920	snp_16134_PA_chr01:4033920	CpG	4011421	4068670	+	0				2	PA_chr01:517134752-517134752;PA_chr01:517134799-517134799	CpG	PA_chr01	517134752;517134799	genic	BREEDING	TMV resistance protein N-like			NB-ARC domain	LEUCINE-RICH REPEAT-CONTAINING PROTEIN	FALSE
PA_chr01_G000019	19818	PA_chr01	4033752	snp_19818_PA_chr01:4033752	CpG	4011421	4068670	+	0	A	G	0.620751	2	PA_chr01:648832782-648832782;PA_chr01:648832784-648832784	CpG	PA_chr01	648832782;648832784	genic	BREEDING	TMV resistance protein N-like			NB-ARC domain	LEUCINE-RICH REPEAT-CONTAINING PROTEIN	FALSE
PA_chr01_G000019	21109	PA_chr01	4033811	snp_21109_PA_chr01:4033811	CpG	4011421	4068670	+	0				2	PA_chr01:708988452-708988452;PA_chr01:708988569-708988569	CHH;CpG	PA_chr01	708988452;708988569	genic	BREEDING	TMV resistance protein N-like			NB-ARC domain	LEUCINE-RICH REPEAT-CONTAINING PROTEIN	FALSE
PA_chr01_G000019	21109	PA_chr01	4033811	snp_21109_PA_chr01:4033811	CpG	4011421	4068670	+	0				2	PA_chr01:708988452-708988452;PA_chr01:708988569-708988569	CHH;CpG	PA_chr01	708988452;708988569	genic	BREEDING	TMV resistance protein N-like			NB-ARC domain	LEUCINE-RICH REPEAT-CONTAINING PROTEIN	FALSE
PA_chr01_G000019	21120	PA_chr01	4033881	snp_21120_PA_chr01:4033881	CpG	4011421	4068670	+	0	C	T	0.0732143	2	PA_chr01:708988452-708988452;PA_chr01:708988569-708988569	CHH;CpG	PA_chr01	708988452;708988569	genic	BREEDING	TMV resistance protein N-like			NB-ARC domain	LEUCINE-RICH REPEAT-CONTAINING PROTEIN	FALSE
PA_chr01_G000019	21120	PA_chr01	4033881	snp_21120_PA_chr01:4033881	CpG	4011421	4068670	+	0	C	T	0.0732143	2	PA_chr01:708988452-708988452;PA_chr01:708988569-708988569	CHH;CpG	PA_chr01	708988452;708988569	genic	BREEDING	TMV resistance protein N-like			NB-ARC domain	LEUCINE-RICH REPEAT-CONTAINING PROTEIN	FALSE
PA_chr01_G000019	24787	PA_chr01	4033754	snp_24787_PA_chr01:4033754	CpG	4011421	4068670	+	0				2	PA_chr01:794654861-794654861;PA_chr01:794654934-794654934	CpG	PA_chr01	794654861;794654934	genic	BREEDING	TMV resistance protein N-like			NB-ARC domain	LEUCINE-RICH REPEAT-CONTAINING PROTEIN	FALSE
PA_chr01_G000019	24792	PA_chr01	4033800	snp_24792_PA_chr01:4033800	CpG	4011421	4068670	+	0	C	T	0.129204	2	PA_chr01:794654861-794654861;PA_chr01:794654934-794654934	CpG	PA_chr01	794654861;794654934	genic	BREEDING	TMV resistance protein N-like			NB-ARC domain	LEUCINE-RICH REPEAT-CONTAINING PROTEIN	FALSE
PA_chr01_G000019	24794	PA_chr01	4033803	snp_24794_PA_chr01:4033803	CpG	4011421	4068670	+	0				2	PA_chr01:794654861-794654861;PA_chr01:794654934-794654934	CpG	PA_chr01	794654861;794654934	genic	BREEDING	TMV resistance protein N-like			NB-ARC domain	LEUCINE-RICH REPEAT-CONTAINING PROTEIN	FALSE
PA_chr01_G000019	25657	PA_chr01	4033712	snp_25657_PA_chr01:4033712	CpG	4011421	4068670	+	0	A	T	0.0942029	2	PA_chr01:823533707-823533707;PA_chr01:823533719-823533719	CpG	PA_chr01	823533707;823533719	genic	BREEDING	TMV resistance protein N-like			NB-ARC domain	LEUCINE-RICH REPEAT-CONTAINING PROTEIN	FALSE
PA_chr01_G000019	25785	PA_chr01	4033889	snp_25785_PA_chr01:4033889	CpG	4011421	4068670	+	0				2	PA_chr01:827079433-827079433;PA_chr01:827079469-827079469	CHH;CpG	PA_chr01	827079433;827079469	genic	BREEDING	TMV resistance protein N-like			NB-ARC domain	LEUCINE-RICH REPEAT-CONTAINING PROTEIN	FALSE
PA_chr01_G000019	25785	PA_chr01	4033889	snp_25785_PA_chr01:4033889	CpG	4011421	4068670	+	0				2	PA_chr01:827079433-827079433;PA_chr01:827079469-827079469	CHH;CpG	PA_chr01	827079433;827079469	genic	BREEDING	TMV resistance protein N-like			NB-ARC domain	LEUCINE-RICH REPEAT-CONTAINING PROTEIN	FALSE
PA_chr01_G000019	27327	PA_chr01	4060745	snp_27327_PA_chr01:4060745	CpG	4011421	4068670	+	0	G	A	0.076087	2	PA_chr01:877705497-877705497;PA_chr01:877705518-877705518	CHH;CpG	PA_chr01	877705497;877705518	genic	BREEDING	TMV resistance protein N-like			NB-ARC domain	LEUCINE-RICH REPEAT-CONTAINING PROTEIN	FALSE
PA_chr01_G000019	27327	PA_chr01	4060745	snp_27327_PA_chr01:4060745	CpG	4011421	4068670	+	0	G	A	0.076087	2	PA_chr01:877705497-877705497;PA_chr01:877705518-877705518	CHH;CpG	PA_chr01	877705497;877705518	genic	BREEDING	TMV resistance protein N-like			NB-ARC domain	LEUCINE-RICH REPEAT-CONTAINING PROTEIN	FALSE
PA_chr01_G000019	43836	PA_chr01	4033765	snp_43836_PA_chr01:4033765	CpG	4011421	4068670	+	0	G	A	0.060177	2	PA_chr01:1515329964-1515329964;PA_chr01:1515329975-1515329975	CpG	PA_chr01	1515329964;1515329975	genic	BREEDING	TMV resistance protein N-like			NB-ARC domain	LEUCINE-RICH REPEAT-CONTAINING PROTEIN	FALSE
PA_chr01_G000019	46655	PA_chr01	4033920	snp_46655_PA_chr01:4033920	CpG	4011421	4068670	+	0				2	PA_chr01:1631361603-1631361603;PA_chr01:1631361604-1631361604	CHG;CpG	PA_chr01	1631361603;1631361604	genic	BREEDING	TMV resistance protein N-like			NB-ARC domain	LEUCINE-RICH REPEAT-CONTAINING PROTEIN	FALSE
PA_chr01_G000019	46655	PA_chr01	4033920	snp_46655_PA_chr01:4033920	CpG	4011421	4068670	+	0				2	PA_chr01:1631361603-1631361603;PA_chr01:1631361604-1631361604	CHG;CpG	PA_chr01	1631361603;1631361604	genic	BREEDING	TMV resistance protein N-like			NB-ARC domain	LEUCINE-RICH REPEAT-CONTAINING PROTEIN	FALSE
PA_chr01_G000019	8210	PA_chr01	4060613	snp_8210_PA_chr01:4060613	CpG	4011421	4068670	+	0	G	T	0.0813743	2	PA_chr01:231299876-231299876;PA_chr01:231299882-231299882	CpG	PA_chr01	231299876;231299882	genic	BREEDING	TMV resistance protein N-like			NB-ARC domain	LEUCINE-RICH REPEAT-CONTAINING PROTEIN	FALSE
PA_chr01_G000019	8211	PA_chr01	4060621	snp_8211_PA_chr01:4060621	CpG	4011421	4068670	+	0	C	G	0.072973	2	PA_chr01:231299876-231299876;PA_chr01:231299882-231299882	CpG	PA_chr01	231299876;231299882	genic	BREEDING	TMV resistance protein N-like			NB-ARC domain	LEUCINE-RICH REPEAT-CONTAINING PROTEIN	FALSE
PA_chr01_G000019	8668	PA_chr01	4033818	snp_8668_PA_chr01:4033818	CpG	4011421	4068670	+	0	T	C	0.128546	2	PA_chr01:257696973-257696973;PA_chr01:257697157-257697157	CpG	PA_chr01	257696973;257697157	genic	BREEDING	TMV resistance protein N-like			NB-ARC domain	LEUCINE-RICH REPEAT-CONTAINING PROTEIN	FALSE
PA_chr01_G000019	8689	PA_chr01	4060761	snp_8689_PA_chr01:4060761	CpG	4011421	4068670	+	0	G	A	0.057971	2	PA_chr01:257696997-257696997;PA_chr01:257697143-257697143	CHH;CpG	PA_chr01	257696997;257697143	genic	BREEDING	TMV resistance protein N-like			NB-ARC domain	LEUCINE-RICH REPEAT-CONTAINING PROTEIN	FALSE
PA_chr01_G000019	8689	PA_chr01	4060761	snp_8689_PA_chr01:4060761	CpG	4011421	4068670	+	0	G	A	0.057971	2	PA_chr01:257696997-257696997;PA_chr01:257697143-257697143	CHH;CpG	PA_chr01	257696997;257697143	genic	BREEDING	TMV resistance protein N-like			NB-ARC domain	LEUCINE-RICH REPEAT-CONTAINING PROTEIN	FALSE
PA_chr01_G000019	10749	PA_chr01	4060593	snp_10749_PA_chr01:4060593	CHG	4011421	4068670	+	0	A	G	0.0772727	1	PA_chr01:358504891-358504891	CHG	PA_chr01	358504891	genic	BREEDING	TMV resistance protein N-like			NB-ARC domain	LEUCINE-RICH REPEAT-CONTAINING PROTEIN	FALSE
PA_chr01_G000019	11060	PA_chr01	4060755	snp_11060_PA_chr01:4060755	CHG	4011421	4068670	+	0	C	G	0.273551	1	PA_chr01:365728646-365728646	CHG	PA_chr01	365728646	genic	BREEDING	TMV resistance protein N-like			NB-ARC domain	LEUCINE-RICH REPEAT-CONTAINING PROTEIN	FALSE
PA_chr01_G000019	13899	PA_chr01	4033779	snp_13899_PA_chr01:4033779	CHG	4011421	4068670	+	0	G	A	0.167257	1	PA_chr01:451056668-451056668	CHG	PA_chr01	451056668	genic	BREEDING	TMV resistance protein N-like			NB-ARC domain	LEUCINE-RICH REPEAT-CONTAINING PROTEIN	FALSE
PA_chr01_G000019	13916	PA_chr01	4033912	snp_13916_PA_chr01:4033912	CHG	4011421	4068670	+	0				1	PA_chr01:451056668-451056668	CHG	PA_chr01	451056668	genic	BREEDING	TMV resistance protein N-like			NB-ARC domain	LEUCINE-RICH REPEAT-CONTAINING PROTEIN	FALSE
PA_chr01_G000019	14507	PA_chr01	4060605	snp_14507_PA_chr01:4060605	CHG	4011421	4068670	+	0				1	PA_chr01:467703019-467703019	CHG	PA_chr01	467703019	genic	BREEDING	TMV resistance protein N-like			NB-ARC domain	LEUCINE-RICH REPEAT-CONTAINING PROTEIN	FALSE
PA_chr01_G000019	14607	PA_chr01	4033736	snp_14607_PA_chr01:4033736	CHG	4011421	4068670	+	0				1	PA_chr01:478057862-478057862	CHG	PA_chr01	478057862	genic	BREEDING	TMV resistance protein N-like			NB-ARC domain	LEUCINE-RICH REPEAT-CONTAINING PROTEIN	FALSE
PA_chr01_G000019	19755	PA_chr01	4033716	snp_19755_PA_chr01:4033716	CHG	4011421	4068670	+	0	G	A	0.0911552	1	PA_chr01:647286595-647286595	CHG	PA_chr01	647286595	genic	BREEDING	TMV resistance protein N-like			NB-ARC domain	LEUCINE-RICH REPEAT-CONTAINING PROTEIN	FALSE
PA_chr01_G000019	19825	PA_chr01	4033802	snp_19825_PA_chr01:4033802	CHG	4011421	4068670	+	0	G	A	0.0627209	1	PA_chr01:648930562-648930562	CHG	PA_chr01	648930562	genic	BREEDING	TMV resistance protein N-like			NB-ARC domain	LEUCINE-RICH REPEAT-CONTAINING PROTEIN	FALSE
PA_chr01_G000019	19836	PA_chr01	4033848	snp_19836_PA_chr01:4033848	CHG	4011421	4068670	+	0	T	C	0.176732	1	PA_chr01:648930562-648930562	CHG	PA_chr01	648930562	genic	BREEDING	TMV resistance protein N-like			NB-ARC domain	LEUCINE-RICH REPEAT-CONTAINING PROTEIN	FALSE
PA_chr01_G000019	20942	PA_chr01	4060593	snp_20942_PA_chr01:4060593	CHG	4011421	4068670	+	0	A	G	0.0772727	1	PA_chr01:704462952-704462952	CHG	PA_chr01	704462952	genic	BREEDING	TMV resistance protein N-like			NB-ARC domain	LEUCINE-RICH REPEAT-CONTAINING PROTEIN	FALSE
PA_chr01_G000019	21856	PA_chr01	4033856	snp_21856_PA_chr01:4033856	CHG	4011421	4068670	+	0	T	A	0.116756	1	PA_chr01:728581014-728581014	CHG	PA_chr01	728581014	genic	BREEDING	TMV resistance protein N-like			NB-ARC domain	LEUCINE-RICH REPEAT-CONTAINING PROTEIN	FALSE
PA_chr01_G000019	2290	PA_chr01	4060710	snp_2290_PA_chr01:4060710	CHG	4011421	4068670	+	0	A	G	0.164298	1	PA_chr01:55382583-55382583	CHG	PA_chr01	55382583	genic	BREEDING	TMV resistance protein N-like			NB-ARC domain	LEUCINE-RICH REPEAT-CONTAINING PROTEIN	FALSE
PA_chr01_G000019	24754	PA_chr01	4033690	snp_24754_PA_chr01:4033690	CHG	4011421	4068670	+	0	G	A	0.191257	1	PA_chr01:794371788-794371788	CHG	PA_chr01	794371788	genic	BREEDING	TMV resistance protein N-like			NB-ARC domain	LEUCINE-RICH REPEAT-CONTAINING PROTEIN	FALSE
PA_chr01_G000019	24790	PA_chr01	4033774	snp_24790_PA_chr01:4033774	CHG	4011421	4068670	+	0	A	T	0.144876	1	PA_chr01:794654938-794654938	CHG	PA_chr01	794654938	genic	BREEDING	TMV resistance protein N-like			NB-ARC domain	LEUCINE-RICH REPEAT-CONTAINING PROTEIN	FALSE
PA_chr01_G000019	25245	PA_chr01	4033690	snp_25245_PA_chr01:4033690	CHG	4011421	4068670	+	0	G	A	0.191257	1	PA_chr01:808948726-808948726	CHG	PA_chr01	808948726	genic	BREEDING	TMV resistance protein N-like			NB-ARC domain	LEUCINE-RICH REPEAT-CONTAINING PROTEIN	FALSE
PA_chr01_G000019	25615	PA_chr01	4033920	snp_25615_PA_chr01:4033920	CHG	4011421	4068670	+	0				1	PA_chr01:822262080-822262080	CHG	PA_chr01	822262080	genic	BREEDING	TMV resistance protein N-like			NB-ARC domain	LEUCINE-RICH REPEAT-CONTAINING PROTEIN	FALSE
PA_chr01_G000019	27311	PA_chr01	4033826	snp_27311_PA_chr01:4033826	CHG	4011421	4068670	+	0				1	PA_chr01:877705327-877705327	CHG	PA_chr01	877705327	genic	BREEDING	TMV resistance protein N-like			NB-ARC domain	LEUCINE-RICH REPEAT-CONTAINING PROTEIN	FALSE
PA_chr01_G000019	27313	PA_chr01	4033833	snp_27313_PA_chr01:4033833	CHG	4011421	4068670	+	0	C	T	0.0879219	1	PA_chr01:877705450-877705450	CHG	PA_chr01	877705450	genic	BREEDING	TMV resistance protein N-like			NB-ARC domain	LEUCINE-RICH REPEAT-CONTAINING PROTEIN	FALSE
PA_chr01_G000019	27325	PA_chr01	4060621	snp_27325_PA_chr01:4060621	CHG	4011421	4068670	+	0	C	G	0.072973	1	PA_chr01:877705450-877705450	CHG	PA_chr01	877705450	genic	BREEDING	TMV resistance protein N-like			NB-ARC domain	LEUCINE-RICH REPEAT-CONTAINING PROTEIN	FALSE
PA_chr01_G000019	27774	PA_chr01	4033811	snp_27774_PA_chr01:4033811	CHG	4011421	4068670	+	0				1	PA_chr01:886397451-886397451	CHG	PA_chr01	886397451	genic	BREEDING	TMV resistance protein N-like			NB-ARC domain	LEUCINE-RICH REPEAT-CONTAINING PROTEIN	FALSE
PA_chr01_G000019	27778	PA_chr01	4033818	snp_27778_PA_chr01:4033818	CHG	4011421	4068670	+	0	T	C	0.128546	1	PA_chr01:886397521-886397521	CHG	PA_chr01	886397521	genic	BREEDING	TMV resistance protein N-like			NB-ARC domain	LEUCINE-RICH REPEAT-CONTAINING PROTEIN	FALSE
PA_chr01_G000019	31331	PA_chr01	4033824	snp_31331_PA_chr01:4033824	CHG	4011421	4068670	+	0	T	C	0.44573	1	PA_chr01:1032604973-1032604973	CHG	PA_chr01	1032604973	genic	BREEDING	TMV resistance protein N-like			NB-ARC domain	LEUCINE-RICH REPEAT-CONTAINING PROTEIN	FALSE
PA_chr01_G000019	3234	PA_chr01	4060710	snp_3234_PA_chr01:4060710	CHG	4011421	4068670	+	0	A	G	0.164298	1	PA_chr01:100067023-100067023	CHG	PA_chr01	100067023	genic	BREEDING	TMV resistance protein N-like			NB-ARC domain	LEUCINE-RICH REPEAT-CONTAINING PROTEIN	FALSE
PA_chr01_G000019	33255	PA_chr01	4033889	snp_33255_PA_chr01:4033889	CHG	4011421	4068670	+	0				1	PA_chr01:1096665323-1096665323	CHG	PA_chr01	1096665323	genic	BREEDING	TMV resistance protein N-like			NB-ARC domain	LEUCINE-RICH REPEAT-CONTAINING PROTEIN	FALSE
PA_chr01_G000019	33262	PA_chr01	4060613	snp_33262_PA_chr01:4060613	CHG	4011421	4068670	+	0	G	T	0.0813743	1	PA_chr01:1096665323-1096665323	CHG	PA_chr01	1096665323	genic	BREEDING	TMV resistance protein N-like			NB-ARC domain	LEUCINE-RICH REPEAT-CONTAINING PROTEIN	FALSE
PA_chr01_G000019	36646	PA_chr01	4060593	snp_36646_PA_chr01:4060593	CHG	4011421	4068670	+	0	A	G	0.0772727	1	PA_chr01:1214769837-1214769837	CHG	PA_chr01	1214769837	genic	BREEDING	TMV resistance protein N-like			NB-ARC domain	LEUCINE-RICH REPEAT-CONTAINING PROTEIN	FALSE
PA_chr01_G000019	39912	PA_chr01	4033779	snp_39912_PA_chr01:4033779	CHG	4011421	4068670	+	0	G	A	0.167257	1	PA_chr01:1352064192-1352064192	CHG	PA_chr01	1352064192	genic	BREEDING	TMV resistance protein N-like			NB-ARC domain	LEUCINE-RICH REPEAT-CONTAINING PROTEIN	FALSE
PA_chr01_G000019	39917	PA_chr01	4033812	snp_39917_PA_chr01:4033812	CHG	4011421	4068670	+	0	G	C	0.102837	1	PA_chr01:1352064192-1352064192	CHG	PA_chr01	1352064192	genic	BREEDING	TMV resistance protein N-like			NB-ARC domain	LEUCINE-RICH REPEAT-CONTAINING PROTEIN	FALSE
PA_chr01_G000019	40063	PA_chr01	4033833	snp_40063_PA_chr01:4033833	CHG	4011421	4068670	+	0	C	T	0.0879219	1	PA_chr01:1358765669-1358765669	CHG	PA_chr01	1358765669	genic	BREEDING	TMV resistance protein N-like			NB-ARC domain	LEUCINE-RICH REPEAT-CONTAINING PROTEIN	FALSE
PA_chr01_G000019	40474	PA_chr01	4033765	snp_40474_PA_chr01:4033765	CHG	4011421	4068670	+	0	G	A	0.060177	1	PA_chr01:1378542351-1378542351	CHG	PA_chr01	1378542351	genic	BREEDING	TMV resistance protein N-like			NB-ARC domain	LEUCINE-RICH REPEAT-CONTAINING PROTEIN	FALSE
PA_chr01_G000019	41674	PA_chr01	4033765	snp_41674_PA_chr01:4033765	CHG	4011421	4068670	+	0	G	A	0.060177	1	PA_chr01:1434369841-1434369841	CHG	PA_chr01	1434369841	genic	BREEDING	TMV resistance protein N-like			NB-ARC domain	LEUCINE-RICH REPEAT-CONTAINING PROTEIN	FALSE
PA_chr01_G000019	41676	PA_chr01	4033779	snp_41676_PA_chr01:4033779	CHG	4011421	4068670	+	0	G	A	0.167257	1	PA_chr01:1434369890-1434369890	CHG	PA_chr01	1434369890	genic	BREEDING	TMV resistance protein N-like			NB-ARC domain	LEUCINE-RICH REPEAT-CONTAINING PROTEIN	FALSE
PA_chr01_G000019	41680	PA_chr01	4033811	snp_41680_PA_chr01:4033811	CHG	4011421	4068670	+	0				1	PA_chr01:1434369890-1434369890	CHG	PA_chr01	1434369890	genic	BREEDING	TMV resistance protein N-like			NB-ARC domain	LEUCINE-RICH REPEAT-CONTAINING PROTEIN	FALSE
PA_chr01_G000019	41684	PA_chr01	4033818	snp_41684_PA_chr01:4033818	CHG	4011421	4068670	+	0	T	C	0.128546	1	PA_chr01:1434369841-1434369841	CHG	PA_chr01	1434369841	genic	BREEDING	TMV resistance protein N-like			NB-ARC domain	LEUCINE-RICH REPEAT-CONTAINING PROTEIN	FALSE
PA_chr01_G000019	41688	PA_chr01	4033833	snp_41688_PA_chr01:4033833	CHG	4011421	4068670	+	0	C	T	0.0879219	1	PA_chr01:1434369841-1434369841	CHG	PA_chr01	1434369841	genic	BREEDING	TMV resistance protein N-like			NB-ARC domain	LEUCINE-RICH REPEAT-CONTAINING PROTEIN	FALSE
PA_chr01_G000019	41690	PA_chr01	4033856	snp_41690_PA_chr01:4033856	CHG	4011421	4068670	+	0	T	A	0.116756	1	PA_chr01:1434369841-1434369841	CHG	PA_chr01	1434369841	genic	BREEDING	TMV resistance protein N-like			NB-ARC domain	LEUCINE-RICH REPEAT-CONTAINING PROTEIN	FALSE
PA_chr01_G000019	41691	PA_chr01	4033881	snp_41691_PA_chr01:4033881	CHG	4011421	4068670	+	0	C	T	0.0732143	1	PA_chr01:1434369890-1434369890	CHG	PA_chr01	1434369890	genic	BREEDING	TMV resistance protein N-like			NB-ARC domain	LEUCINE-RICH REPEAT-CONTAINING PROTEIN	FALSE
PA_chr01_G000019	41704	PA_chr01	4060755	snp_41704_PA_chr01:4060755	CHG	4011421	4068670	+	0	C	G	0.273551	1	PA_chr01:1434369890-1434369890	CHG	PA_chr01	1434369890	genic	BREEDING	TMV resistance protein N-like			NB-ARC domain	LEUCINE-RICH REPEAT-CONTAINING PROTEIN	FALSE
PA_chr01_G000019	43996	PA_chr01	4060613	snp_43996_PA_chr01:4060613	CHG	4011421	4068670	+	0	G	T	0.0813743	1	PA_chr01:1522867579-1522867579	CHG	PA_chr01	1522867579	genic	BREEDING	TMV resistance protein N-like			NB-ARC domain	LEUCINE-RICH REPEAT-CONTAINING PROTEIN	FALSE
PA_chr01_G000019	44092	PA_chr01	4033763	snp_44092_PA_chr01:4033763	CHG	4011421	4068670	+	0	G	A	0.0761062	1	PA_chr01:1524094670-1524094670	CHG	PA_chr01	1524094670	genic	BREEDING	TMV resistance protein N-like			NB-ARC domain	LEUCINE-RICH REPEAT-CONTAINING PROTEIN	FALSE
PA_chr01_G000019	46381	PA_chr01	4033712	snp_46381_PA_chr01:4033712	CHG	4011421	4068670	+	0	A	T	0.0942029	1	PA_chr01:1616458112-1616458112	CHG	PA_chr01	1616458112	genic	BREEDING	TMV resistance protein N-like			NB-ARC domain	LEUCINE-RICH REPEAT-CONTAINING PROTEIN	FALSE
PA_chr01_G000019	46744	PA_chr01	4033774	snp_46744_PA_chr01:4033774	CHG	4011421	4068670	+	0	A	T	0.144876	1	PA_chr01:1634041172-1634041172	CHG	PA_chr01	1634041172	genic	BREEDING	TMV resistance protein N-like			NB-ARC domain	LEUCINE-RICH REPEAT-CONTAINING PROTEIN	FALSE
PA_chr01_G000019	46745	PA_chr01	4033779	snp_46745_PA_chr01:4033779	CHG	4011421	4068670	+	0	G	A	0.167257	1	PA_chr01:1634041172-1634041172	CHG	PA_chr01	1634041172	genic	BREEDING	TMV resistance protein N-like			NB-ARC domain	LEUCINE-RICH REPEAT-CONTAINING PROTEIN	FALSE
PA_chr01_G000019	47727	PA_chr01	4033920	snp_47727_PA_chr01:4033920	CHG	4011421	4068670	+	0				1	PA_chr01:1662227028-1662227028	CHG	PA_chr01	1662227028	genic	BREEDING	TMV resistance protein N-like			NB-ARC domain	LEUCINE-RICH REPEAT-CONTAINING PROTEIN	FALSE
PA_chr01_G000019	6101	PA_chr01	4060746	snp_6101_PA_chr01:4060746	CHG	4011421	4068670	+	0				1	PA_chr01:189797556-189797556	CHG	PA_chr01	189797556	genic	BREEDING	TMV resistance protein N-like			NB-ARC domain	LEUCINE-RICH REPEAT-CONTAINING PROTEIN	FALSE
PA_chr01_G000019	6102	PA_chr01	4060755	snp_6102_PA_chr01:4060755	CHG	4011421	4068670	+	0	C	G	0.273551	1	PA_chr01:189797556-189797556	CHG	PA_chr01	189797556	genic	BREEDING	TMV resistance protein N-like			NB-ARC domain	LEUCINE-RICH REPEAT-CONTAINING PROTEIN	FALSE
PA_chr01_G000019	806	PA_chr01	4033848	snp_806_PA_chr01:4033848	CHG	4011421	4068670	+	0	T	C	0.176732	1	PA_chr01:13523911-13523911	CHG	PA_chr01	13523911	genic	BREEDING	TMV resistance protein N-like			NB-ARC domain	LEUCINE-RICH REPEAT-CONTAINING PROTEIN	FALSE
PA_chr01_G000019	11033	PA_chr01	4033800	snp_11033_PA_chr01:4033800	CHH	4011421	4068670	+	0	C	T	0.129204	1	PA_chr01:365728640-365728640	CHH	PA_chr01	365728640	genic	BREEDING	TMV resistance protein N-like			NB-ARC domain	LEUCINE-RICH REPEAT-CONTAINING PROTEIN	FALSE
PA_chr01_G000019	11971	PA_chr01	4033848	snp_11971_PA_chr01:4033848	CHH	4011421	4068670	+	0	T	C	0.176732	1	PA_chr01:379922784-379922784	CHH	PA_chr01	379922784	genic	BREEDING	TMV resistance protein N-like			NB-ARC domain	LEUCINE-RICH REPEAT-CONTAINING PROTEIN	FALSE
PA_chr01_G000019	12407	PA_chr01	4033912	snp_12407_PA_chr01:4033912	CHH	4011421	4068670	+	0				1	PA_chr01:390530443-390530443	CHH	PA_chr01	390530443	genic	BREEDING	TMV resistance protein N-like			NB-ARC domain	LEUCINE-RICH REPEAT-CONTAINING PROTEIN	FALSE
PA_chr01_G000019	14605	PA_chr01	4033712	snp_14605_PA_chr01:4033712	CHH	4011421	4068670	+	0	A	T	0.0942029	1	PA_chr01:478057753-478057753	CHH	PA_chr01	478057753	genic	BREEDING	TMV resistance protein N-like			NB-ARC domain	LEUCINE-RICH REPEAT-CONTAINING PROTEIN	FALSE
PA_chr01_G000019	16129	PA_chr01	4033848	snp_16129_PA_chr01:4033848	CHH	4011421	4068670	+	0	T	C	0.176732	1	PA_chr01:517204691-517204691	CHH	PA_chr01	517204691	genic	BREEDING	TMV resistance protein N-like			NB-ARC domain	LEUCINE-RICH REPEAT-CONTAINING PROTEIN	FALSE
PA_chr01_G000019	16139	PA_chr01	4060613	snp_16139_PA_chr01:4060613	CHH	4011421	4068670	+	0	G	T	0.0813743	1	PA_chr01:517204691-517204691	CHH	PA_chr01	517204691	genic	BREEDING	TMV resistance protein N-like			NB-ARC domain	LEUCINE-RICH REPEAT-CONTAINING PROTEIN	FALSE
PA_chr01_G000019	16140	PA_chr01	4060621	snp_16140_PA_chr01:4060621	CHH	4011421	4068670	+	0	C	G	0.072973	1	PA_chr01:517204691-517204691	CHH	PA_chr01	517204691	genic	BREEDING	TMV resistance protein N-like			NB-ARC domain	LEUCINE-RICH REPEAT-CONTAINING PROTEIN	FALSE
PA_chr01_G000019	17452	PA_chr01	4033812	snp_17452_PA_chr01:4033812	CHH	4011421	4068670	+	0	G	C	0.102837	1	PA_chr01:555693120-555693120	CHH	PA_chr01	555693120	genic	BREEDING	TMV resistance protein N-like			NB-ARC domain	LEUCINE-RICH REPEAT-CONTAINING PROTEIN	FALSE
PA_chr01_G000019	17467	PA_chr01	4060585	snp_17467_PA_chr01:4060585	CHH	4011421	4068670	+	0	G	C	0.0741758	1	PA_chr01:555693120-555693120	CHH	PA_chr01	555693120	genic	BREEDING	TMV resistance protein N-like			NB-ARC domain	LEUCINE-RICH REPEAT-CONTAINING PROTEIN	FALSE
PA_chr01_G000019	17470	PA_chr01	4060613	snp_17470_PA_chr01:4060613	CHH	4011421	4068670	+	0	G	T	0.0813743	1	PA_chr01:555693120-555693120	CHH	PA_chr01	555693120	genic	BREEDING	TMV resistance protein N-like			NB-ARC domain	LEUCINE-RICH REPEAT-CONTAINING PROTEIN	FALSE
PA_chr01_G000019	18688	PA_chr01	4033763	snp_18688_PA_chr01:4033763	CHH	4011421	4068670	+	0	G	A	0.0761062	1	PA_chr01:599161246-599161246	CHH	PA_chr01	599161246	genic	BREEDING	TMV resistance protein N-like			NB-ARC domain	LEUCINE-RICH REPEAT-CONTAINING PROTEIN	FALSE
PA_chr01_G000019	20373	PA_chr01	4033829	snp_20373_PA_chr01:4033829	CHH	4011421	4068670	+	0	C	A	0.92959	1	PA_chr01:662763202-662763202	CHH	PA_chr01	662763202	genic	BREEDING	TMV resistance protein N-like			NB-ARC domain	LEUCINE-RICH REPEAT-CONTAINING PROTEIN	FALSE
PA_chr01_G000019	21110	PA_chr01	4033812	snp_21110_PA_chr01:4033812	CHH	4011421	4068670	+	0	G	C	0.102837	1	PA_chr01:708988452-708988452	CHH	PA_chr01	708988452	genic	BREEDING	TMV resistance protein N-like			NB-ARC domain	LEUCINE-RICH REPEAT-CONTAINING PROTEIN	FALSE
PA_chr01_G000019	23247	PA_chr01	4033912	snp_23247_PA_chr01:4033912	CHH	4011421	4068670	+	0				1	PA_chr01:761356117-761356117	CHH	PA_chr01	761356117	genic	BREEDING	TMV resistance protein N-like			NB-ARC domain	LEUCINE-RICH REPEAT-CONTAINING PROTEIN	FALSE
PA_chr01_G000019	23291	PA_chr01	4033754	snp_23291_PA_chr01:4033754	CHH	4011421	4068670	+	0				1	PA_chr01:761610650-761610650	CHH	PA_chr01	761610650	genic	BREEDING	TMV resistance protein N-like			NB-ARC domain	LEUCINE-RICH REPEAT-CONTAINING PROTEIN	FALSE
PA_chr01_G000019	23336	PA_chr01	4033774	snp_23336_PA_chr01:4033774	CHH	4011421	4068670	+	0	A	T	0.144876	1	PA_chr01:762064542-762064542	CHH	PA_chr01	762064542	genic	BREEDING	TMV resistance protein N-like			NB-ARC domain	LEUCINE-RICH REPEAT-CONTAINING PROTEIN	FALSE
PA_chr01_G000019	23337	PA_chr01	4033779	snp_23337_PA_chr01:4033779	CHH	4011421	4068670	+	0	G	A	0.167257	1	PA_chr01:762064542-762064542	CHH	PA_chr01	762064542	genic	BREEDING	TMV resistance protein N-like			NB-ARC domain	LEUCINE-RICH REPEAT-CONTAINING PROTEIN	FALSE
PA_chr01_G000019	23349	PA_chr01	4033833	snp_23349_PA_chr01:4033833	CHH	4011421	4068670	+	0	C	T	0.0879219	1	PA_chr01:762064542-762064542	CHH	PA_chr01	762064542	genic	BREEDING	TMV resistance protein N-like			NB-ARC domain	LEUCINE-RICH REPEAT-CONTAINING PROTEIN	FALSE
PA_chr01_G000019	23351	PA_chr01	4033856	snp_23351_PA_chr01:4033856	CHH	4011421	4068670	+	0	T	A	0.116756	1	PA_chr01:762064542-762064542	CHH	PA_chr01	762064542	genic	BREEDING	TMV resistance protein N-like			NB-ARC domain	LEUCINE-RICH REPEAT-CONTAINING PROTEIN	FALSE
PA_chr01_G000019	23353	PA_chr01	4033889	snp_23353_PA_chr01:4033889	CHH	4011421	4068670	+	0				1	PA_chr01:762064542-762064542	CHH	PA_chr01	762064542	genic	BREEDING	TMV resistance protein N-like			NB-ARC domain	LEUCINE-RICH REPEAT-CONTAINING PROTEIN	FALSE
PA_chr01_G000019	23762	PA_chr01	4033833	snp_23762_PA_chr01:4033833	CHH	4011421	4068670	+	0	C	T	0.0879219	1	PA_chr01:769875633-769875633	CHH	PA_chr01	769875633	genic	BREEDING	TMV resistance protein N-like			NB-ARC domain	LEUCINE-RICH REPEAT-CONTAINING PROTEIN	FALSE
PA_chr01_G000019	23771	PA_chr01	4033736	snp_23771_PA_chr01:4033736	CHH	4011421	4068670	+	0				1	PA_chr01:770090855-770090855	CHH	PA_chr01	770090855	genic	BREEDING	TMV resistance protein N-like			NB-ARC domain	LEUCINE-RICH REPEAT-CONTAINING PROTEIN	FALSE
PA_chr01_G000019	23773	PA_chr01	4033752	snp_23773_PA_chr01:4033752	CHH	4011421	4068670	+	0	A	G	0.620751	1	PA_chr01:770090855-770090855	CHH	PA_chr01	770090855	genic	BREEDING	TMV resistance protein N-like			NB-ARC domain	LEUCINE-RICH REPEAT-CONTAINING PROTEIN	FALSE
PA_chr01_G000019	23871	PA_chr01	4033736	snp_23871_PA_chr01:4033736	CHH	4011421	4068670	+	0				1	PA_chr01:772222702-772222702	CHH	PA_chr01	772222702	genic	BREEDING	TMV resistance protein N-like			NB-ARC domain	LEUCINE-RICH REPEAT-CONTAINING PROTEIN	FALSE
PA_chr01_G000019	23872	PA_chr01	4033751	snp_23872_PA_chr01:4033751	CHH	4011421	4068670	+	0	C	T	0.123214	1	PA_chr01:772222702-772222702	CHH	PA_chr01	772222702	genic	BREEDING	TMV resistance protein N-like			NB-ARC domain	LEUCINE-RICH REPEAT-CONTAINING PROTEIN	FALSE
PA_chr01_G000019	23877	PA_chr01	4033774	snp_23877_PA_chr01:4033774	CHH	4011421	4068670	+	0	A	T	0.144876	1	PA_chr01:772222702-772222702	CHH	PA_chr01	772222702	genic	BREEDING	TMV resistance protein N-like			NB-ARC domain	LEUCINE-RICH REPEAT-CONTAINING PROTEIN	FALSE
PA_chr01_G000019	24503	PA_chr01	4033826	snp_24503_PA_chr01:4033826	CHH	4011421	4068670	+	0				1	PA_chr01:786347808-786347808	CHH	PA_chr01	786347808	genic	BREEDING	TMV resistance protein N-like			NB-ARC domain	LEUCINE-RICH REPEAT-CONTAINING PROTEIN	FALSE
PA_chr01_G000019	25626	PA_chr01	4060761	snp_25626_PA_chr01:4060761	CHH	4011421	4068670	+	0	G	A	0.057971	1	PA_chr01:822310219-822310219	CHH	PA_chr01	822310219	genic	BREEDING	TMV resistance protein N-like			NB-ARC domain	LEUCINE-RICH REPEAT-CONTAINING PROTEIN	FALSE
PA_chr01_G000019	25788	PA_chr01	4033945	snp_25788_PA_chr01:4033945	CHH	4011421	4068670	+	0	C	T	0.0738007	1	PA_chr01:827079469-827079469	CHH	PA_chr01	827079469	genic	BREEDING	TMV resistance protein N-like			NB-ARC domain	LEUCINE-RICH REPEAT-CONTAINING PROTEIN	FALSE
PA_chr01_G000019	25789	PA_chr01	4060585	snp_25789_PA_chr01:4060585	CHH	4011421	4068670	+	0	G	C	0.0741758	1	PA_chr01:827079469-827079469	CHH	PA_chr01	827079469	genic	BREEDING	TMV resistance protein N-like			NB-ARC domain	LEUCINE-RICH REPEAT-CONTAINING PROTEIN	FALSE
PA_chr01_G000019	26035	PA_chr01	4033803	snp_26035_PA_chr01:4033803	CHH	4011421	4068670	+	0				1	PA_chr01:831760575-831760575	CHH	PA_chr01	831760575	genic	BREEDING	TMV resistance protein N-like			NB-ARC domain	LEUCINE-RICH REPEAT-CONTAINING PROTEIN	FALSE
PA_chr01_G000019	26206	PA_chr01	4033763	snp_26206_PA_chr01:4033763	CHH	4011421	4068670	+	0	G	A	0.0761062	1	PA_chr01:837375477-837375477	CHH	PA_chr01	837375477	genic	BREEDING	TMV resistance protein N-like			NB-ARC domain	LEUCINE-RICH REPEAT-CONTAINING PROTEIN	FALSE
PA_chr01_G000019	27220	PA_chr01	4033824	snp_27220_PA_chr01:4033824	CHH	4011421	4068670	+	0	T	C	0.44573	1	PA_chr01:875908913-875908913	CHH	PA_chr01	875908913	genic	BREEDING	TMV resistance protein N-like			NB-ARC domain	LEUCINE-RICH REPEAT-CONTAINING PROTEIN	FALSE
PA_chr01_G000019	27224	PA_chr01	4033848	snp_27224_PA_chr01:4033848	CHH	4011421	4068670	+	0	T	C	0.176732	1	PA_chr01:875908913-875908913	CHH	PA_chr01	875908913	genic	BREEDING	TMV resistance protein N-like			NB-ARC domain	LEUCINE-RICH REPEAT-CONTAINING PROTEIN	FALSE
PA_chr01_G000019	27312	PA_chr01	4033829	snp_27312_PA_chr01:4033829	CHH	4011421	4068670	+	0	C	A	0.92959	1	PA_chr01:877705560-877705560	CHH	PA_chr01	877705560	genic	BREEDING	TMV resistance protein N-like			NB-ARC domain	LEUCINE-RICH REPEAT-CONTAINING PROTEIN	FALSE
PA_chr01_G000019	31845	PA_chr01	4033712	snp_31845_PA_chr01:4033712	CHH	4011421	4068670	+	0	A	T	0.0942029	1	PA_chr01:1047767699-1047767699	CHH	PA_chr01	1047767699	genic	BREEDING	TMV resistance protein N-like			NB-ARC domain	LEUCINE-RICH REPEAT-CONTAINING PROTEIN	FALSE
PA_chr01_G000019	32939	PA_chr01	4033690	snp_32939_PA_chr01:4033690	CHH	4011421	4068670	+	0	G	A	0.191257	1	PA_chr01:1087277608-1087277608	CHH	PA_chr01	1087277608	genic	BREEDING	TMV resistance protein N-like			NB-ARC domain	LEUCINE-RICH REPEAT-CONTAINING PROTEIN	FALSE
PA_chr01_G000019	34451	PA_chr01	4033779	snp_34451_PA_chr01:4033779	CHH	4011421	4068670	+	0	G	A	0.167257	1	PA_chr01:1131627647-1131627647	CHH	PA_chr01	1131627647	genic	BREEDING	TMV resistance protein N-like			NB-ARC domain	LEUCINE-RICH REPEAT-CONTAINING PROTEIN	FALSE
PA_chr01_G000019	34994	PA_chr01	4033716	snp_34994_PA_chr01:4033716	CHH	4011421	4068670	+	0	G	A	0.0911552	1	PA_chr01:1154387868-1154387868	CHH	PA_chr01	1154387868	genic	BREEDING	TMV resistance protein N-like			NB-ARC domain	LEUCINE-RICH REPEAT-CONTAINING PROTEIN	FALSE
PA_chr01_G000019	35080	PA_chr01	4033716	snp_35080_PA_chr01:4033716	CHH	4011421	4068670	+	0	G	A	0.0911552	1	PA_chr01:1156998220-1156998220	CHH	PA_chr01	1156998220	genic	BREEDING	TMV resistance protein N-like			NB-ARC domain	LEUCINE-RICH REPEAT-CONTAINING PROTEIN	FALSE
PA_chr01_G000019	35534	PA_chr01	4033751	snp_35534_PA_chr01:4033751	CHH	4011421	4068670	+	0	C	T	0.123214	1	PA_chr01:1170053385-1170053385	CHH	PA_chr01	1170053385	genic	BREEDING	TMV resistance protein N-like			NB-ARC domain	LEUCINE-RICH REPEAT-CONTAINING PROTEIN	FALSE
PA_chr01_G000019	36088	PA_chr01	4033700	snp_36088_PA_chr01:4033700	CHH	4011421	4068670	+	0				1	PA_chr01:1194368975-1194368975	CHH	PA_chr01	1194368975	genic	BREEDING	TMV resistance protein N-like			NB-ARC domain	LEUCINE-RICH REPEAT-CONTAINING PROTEIN	FALSE
PA_chr01_G000019	3692	PA_chr01	4033817	snp_3692_PA_chr01:4033817	CHH	4011421	4068670	+	0	A	G	0.140071	1	PA_chr01:116888096-116888096	CHH	PA_chr01	116888096	genic	BREEDING	TMV resistance protein N-like			NB-ARC domain	LEUCINE-RICH REPEAT-CONTAINING PROTEIN	FALSE
PA_chr01_G000019	3699	PA_chr01	4033856	snp_3699_PA_chr01:4033856	CHH	4011421	4068670	+	0	T	A	0.116756	1	PA_chr01:116888096-116888096	CHH	PA_chr01	116888096	genic	BREEDING	TMV resistance protein N-like			NB-ARC domain	LEUCINE-RICH REPEAT-CONTAINING PROTEIN	FALSE
PA_chr01_G000019	3733	PA_chr01	4033881	snp_3733_PA_chr01:4033881	CHH	4011421	4068670	+	0	C	T	0.0732143	1	PA_chr01:117514090-117514090	CHH	PA_chr01	117514090	genic	BREEDING	TMV resistance protein N-like			NB-ARC domain	LEUCINE-RICH REPEAT-CONTAINING PROTEIN	FALSE
PA_chr01_G000019	3741	PA_chr01	4060613	snp_3741_PA_chr01:4060613	CHH	4011421	4068670	+	0	G	T	0.0813743	1	PA_chr01:117514090-117514090	CHH	PA_chr01	117514090	genic	BREEDING	TMV resistance protein N-like			NB-ARC domain	LEUCINE-RICH REPEAT-CONTAINING PROTEIN	FALSE
PA_chr01_G000019	3745	PA_chr01	4060746	snp_3745_PA_chr01:4060746	CHH	4011421	4068670	+	0				1	PA_chr01:117514090-117514090	CHH	PA_chr01	117514090	genic	BREEDING	TMV resistance protein N-like			NB-ARC domain	LEUCINE-RICH REPEAT-CONTAINING PROTEIN	FALSE
PA_chr01_G000019	39916	PA_chr01	4033811	snp_39916_PA_chr01:4033811	CHH	4011421	4068670	+	0				1	PA_chr01:1352064160-1352064160	CHH	PA_chr01	1352064160	genic	BREEDING	TMV resistance protein N-like			NB-ARC domain	LEUCINE-RICH REPEAT-CONTAINING PROTEIN	FALSE
PA_chr01_G000019	41968	PA_chr01	4033754	snp_41968_PA_chr01:4033754	CHH	4011421	4068670	+	0				1	PA_chr01:1442553908-1442553908	CHH	PA_chr01	1442553908	genic	BREEDING	TMV resistance protein N-like			NB-ARC domain	LEUCINE-RICH REPEAT-CONTAINING PROTEIN	FALSE
PA_chr01_G000019	41977	PA_chr01	4033812	snp_41977_PA_chr01:4033812	CHH	4011421	4068670	+	0	G	C	0.102837	1	PA_chr01:1442553908-1442553908	CHH	PA_chr01	1442553908	genic	BREEDING	TMV resistance protein N-like			NB-ARC domain	LEUCINE-RICH REPEAT-CONTAINING PROTEIN	FALSE
PA_chr01_G000019	41983	PA_chr01	4033829	snp_41983_PA_chr01:4033829	CHH	4011421	4068670	+	0	C	A	0.92959	1	PA_chr01:1442553908-1442553908	CHH	PA_chr01	1442553908	genic	BREEDING	TMV resistance protein N-like			NB-ARC domain	LEUCINE-RICH REPEAT-CONTAINING PROTEIN	FALSE
PA_chr01_G000019	42328	PA_chr01	4033889	snp_42328_PA_chr01:4033889	CHH	4011421	4068670	+	0				1	PA_chr01:1449306551-1449306551	CHH	PA_chr01	1449306551	genic	BREEDING	TMV resistance protein N-like			NB-ARC domain	LEUCINE-RICH REPEAT-CONTAINING PROTEIN	FALSE
PA_chr01_G000019	42473	PA_chr01	4033802	snp_42473_PA_chr01:4033802	CHH	4011421	4068670	+	0	G	A	0.0627209	1	PA_chr01:1452122727-1452122727	CHH	PA_chr01	1452122727	genic	BREEDING	TMV resistance protein N-like			NB-ARC domain	LEUCINE-RICH REPEAT-CONTAINING PROTEIN	FALSE
PA_chr01_G000019	42493	PA_chr01	4060605	snp_42493_PA_chr01:4060605	CHH	4011421	4068670	+	0				1	PA_chr01:1452122727-1452122727	CHH	PA_chr01	1452122727	genic	BREEDING	TMV resistance protein N-like			NB-ARC domain	LEUCINE-RICH REPEAT-CONTAINING PROTEIN	FALSE
PA_chr01_G000019	42499	PA_chr01	4060755	snp_42499_PA_chr01:4060755	CHH	4011421	4068670	+	0	C	G	0.273551	1	PA_chr01:1452122727-1452122727	CHH	PA_chr01	1452122727	genic	BREEDING	TMV resistance protein N-like			NB-ARC domain	LEUCINE-RICH REPEAT-CONTAINING PROTEIN	FALSE
PA_chr01_G000019	42724	PA_chr01	4033829	snp_42724_PA_chr01:4033829	CHH	4011421	4068670	+	0	C	A	0.92959	1	PA_chr01:1465285128-1465285128	CHH	PA_chr01	1465285128	genic	BREEDING	TMV resistance protein N-like			NB-ARC domain	LEUCINE-RICH REPEAT-CONTAINING PROTEIN	FALSE
PA_chr01_G000019	43190	PA_chr01	4033912	snp_43190_PA_chr01:4033912	CHH	4011421	4068670	+	0				1	PA_chr01:1474780463-1474780463	CHH	PA_chr01	1474780463	genic	BREEDING	TMV resistance protein N-like			NB-ARC domain	LEUCINE-RICH REPEAT-CONTAINING PROTEIN	FALSE
PA_chr01_G000019	5080	PA_chr01	4033774	snp_5080_PA_chr01:4033774	CHH	4011421	4068670	+	0	A	T	0.144876	1	PA_chr01:164568670-164568670	CHH	PA_chr01	164568670	genic	BREEDING	TMV resistance protein N-like			NB-ARC domain	LEUCINE-RICH REPEAT-CONTAINING PROTEIN	FALSE
PA_chr01_G000019	5436	PA_chr01	4033826	snp_5436_PA_chr01:4033826	CHH	4011421	4068670	+	0				1	PA_chr01:168958783-168958783	CHH	PA_chr01	168958783	genic	BREEDING	TMV resistance protein N-like			NB-ARC domain	LEUCINE-RICH REPEAT-CONTAINING PROTEIN	FALSE
PA_chr01_G000019	6674	PA_chr01	4033690	snp_6674_PA_chr01:4033690	CHH	4011421	4068670	+	0	G	A	0.191257	1	PA_chr01:206556002-206556002	CHH	PA_chr01	206556002	genic	BREEDING	TMV resistance protein N-like			NB-ARC domain	LEUCINE-RICH REPEAT-CONTAINING PROTEIN	FALSE
PA_chr01_G000019	779	PA_chr01	4033802	snp_779_PA_chr01:4033802	CHH	4011421	4068670	+	0	G	A	0.0627209	1	PA_chr01:12338155-12338155	CHH	PA_chr01	12338155	genic	BREEDING	TMV resistance protein N-like			NB-ARC domain	LEUCINE-RICH REPEAT-CONTAINING PROTEIN	FALSE
PA_chr01_G000019	8663	PA_chr01	4033803	snp_8663_PA_chr01:4033803	CHH	4011421	4068670	+	0				1	PA_chr01:257741999-257741999	CHH	PA_chr01	257741999	genic	BREEDING	TMV resistance protein N-like			NB-ARC domain	LEUCINE-RICH REPEAT-CONTAINING PROTEIN	FALSE
PA_chr01_G000019	10745	PA_chr01	4033912	snp_10745_PA_chr01:4033912	CpG	4011421	4068670	+	0				1	PA_chr01:358504747-358504747	CpG	PA_chr01	358504747	genic	BREEDING	TMV resistance protein N-like			NB-ARC domain	LEUCINE-RICH REPEAT-CONTAINING PROTEIN	FALSE
PA_chr01_G000019	12066	PA_chr01	4033802	snp_12066_PA_chr01:4033802	CpG	4011421	4068670	+	0	G	A	0.0627209	1	PA_chr01:380224859-380224859	CpG	PA_chr01	380224859	genic	BREEDING	TMV resistance protein N-like			NB-ARC domain	LEUCINE-RICH REPEAT-CONTAINING PROTEIN	FALSE
PA_chr01_G000019	12069	PA_chr01	4033812	snp_12069_PA_chr01:4033812	CpG	4011421	4068670	+	0	G	C	0.102837	1	PA_chr01:380224859-380224859	CpG	PA_chr01	380224859	genic	BREEDING	TMV resistance protein N-like			NB-ARC domain	LEUCINE-RICH REPEAT-CONTAINING PROTEIN	FALSE
PA_chr01_G000019	14483	PA_chr01	4033765	snp_14483_PA_chr01:4033765	CpG	4011421	4068670	+	0	G	A	0.060177	1	PA_chr01:467702761-467702761	CpG	PA_chr01	467702761	genic	BREEDING	TMV resistance protein N-like			NB-ARC domain	LEUCINE-RICH REPEAT-CONTAINING PROTEIN	FALSE
PA_chr01_G000019	14511	PA_chr01	4060745	snp_14511_PA_chr01:4060745	CpG	4011421	4068670	+	0	G	A	0.076087	1	PA_chr01:467702761-467702761	CpG	PA_chr01	467702761	genic	BREEDING	TMV resistance protein N-like			NB-ARC domain	LEUCINE-RICH REPEAT-CONTAINING PROTEIN	FALSE
PA_chr01_G000019	14512	PA_chr01	4060746	snp_14512_PA_chr01:4060746	CpG	4011421	4068670	+	0				1	PA_chr01:467702761-467702761	CpG	PA_chr01	467702761	genic	BREEDING	TMV resistance protein N-like			NB-ARC domain	LEUCINE-RICH REPEAT-CONTAINING PROTEIN	FALSE
PA_chr01_G000019	16109	PA_chr01	4033736	snp_16109_PA_chr01:4033736	CpG	4011421	4068670	+	0				1	PA_chr01:517134799-517134799	CpG	PA_chr01	517134799	genic	BREEDING	TMV resistance protein N-like			NB-ARC domain	LEUCINE-RICH REPEAT-CONTAINING PROTEIN	FALSE
PA_chr01_G000019	16130	PA_chr01	4033856	snp_16130_PA_chr01:4033856	CpG	4011421	4068670	+	0	T	A	0.116756	1	PA_chr01:517204573-517204573	CpG	PA_chr01	517204573	genic	BREEDING	TMV resistance protein N-like			NB-ARC domain	LEUCINE-RICH REPEAT-CONTAINING PROTEIN	FALSE
PA_chr01_G000019	16135	PA_chr01	4033945	snp_16135_PA_chr01:4033945	CpG	4011421	4068670	+	0	C	T	0.0738007	1	PA_chr01:517204573-517204573	CpG	PA_chr01	517204573	genic	BREEDING	TMV resistance protein N-like			NB-ARC domain	LEUCINE-RICH REPEAT-CONTAINING PROTEIN	FALSE
PA_chr01_G000019	16145	PA_chr01	4060761	snp_16145_PA_chr01:4060761	CpG	4011421	4068670	+	0	G	A	0.057971	1	PA_chr01:517134752-517134752	CpG	PA_chr01	517134752	genic	BREEDING	TMV resistance protein N-like			NB-ARC domain	LEUCINE-RICH REPEAT-CONTAINING PROTEIN	FALSE
PA_chr01_G000019	18785	PA_chr01	4033912	snp_18785_PA_chr01:4033912	CpG	4011421	4068670	+	0				1	PA_chr01:600949052-600949052	CpG	PA_chr01	600949052	genic	BREEDING	TMV resistance protein N-like			NB-ARC domain	LEUCINE-RICH REPEAT-CONTAINING PROTEIN	FALSE
PA_chr01_G000019	19756	PA_chr01	4033736	snp_19756_PA_chr01:4033736	CpG	4011421	4068670	+	0				1	PA_chr01:647320199-647320199	CpG	PA_chr01	647320199	genic	BREEDING	TMV resistance protein N-like			NB-ARC domain	LEUCINE-RICH REPEAT-CONTAINING PROTEIN	FALSE
PA_chr01_G000019	20368	PA_chr01	4033815	snp_20368_PA_chr01:4033815	CpG	4011421	4068670	+	0				1	PA_chr01:662763486-662763486	CpG	PA_chr01	662763486	genic	BREEDING	TMV resistance protein N-like			NB-ARC domain	LEUCINE-RICH REPEAT-CONTAINING PROTEIN	FALSE
PA_chr01_G000019	22183	PA_chr01	4033774	snp_22183_PA_chr01:4033774	CpG	4011421	4068670	+	0	A	T	0.144876	1	PA_chr01:735949085-735949085	CpG	PA_chr01	735949085	genic	BREEDING	TMV resistance protein N-like			NB-ARC domain	LEUCINE-RICH REPEAT-CONTAINING PROTEIN	FALSE
PA_chr01_G000019	23292	PA_chr01	4033763	snp_23292_PA_chr01:4033763	CpG	4011421	4068670	+	0	G	A	0.0761062	1	PA_chr01:761610689-761610689	CpG	PA_chr01	761610689	genic	BREEDING	TMV resistance protein N-like			NB-ARC domain	LEUCINE-RICH REPEAT-CONTAINING PROTEIN	FALSE
PA_chr01_G000019	23347	PA_chr01	4033826	snp_23347_PA_chr01:4033826	CpG	4011421	4068670	+	0				1	PA_chr01:762064572-762064572	CpG	PA_chr01	762064572	genic	BREEDING	TMV resistance protein N-like			NB-ARC domain	LEUCINE-RICH REPEAT-CONTAINING PROTEIN	FALSE
PA_chr01_G000019	23761	PA_chr01	4033829	snp_23761_PA_chr01:4033829	CpG	4011421	4068670	+	0	C	A	0.92959	1	PA_chr01:769875693-769875693	CpG	PA_chr01	769875693	genic	BREEDING	TMV resistance protein N-like			NB-ARC domain	LEUCINE-RICH REPEAT-CONTAINING PROTEIN	FALSE
PA_chr01_G000019	24705	PA_chr01	4033716	snp_24705_PA_chr01:4033716	CpG	4011421	4068670	+	0	G	A	0.0911552	1	PA_chr01:793100166-793100166	CpG	PA_chr01	793100166	genic	BREEDING	TMV resistance protein N-like			NB-ARC domain	LEUCINE-RICH REPEAT-CONTAINING PROTEIN	FALSE
PA_chr01_G000019	24963	PA_chr01	4033800	snp_24963_PA_chr01:4033800	CpG	4011421	4068670	+	0	C	T	0.129204	1	PA_chr01:797215071-797215071	CpG	PA_chr01	797215071	genic	BREEDING	TMV resistance protein N-like			NB-ARC domain	LEUCINE-RICH REPEAT-CONTAINING PROTEIN	FALSE
PA_chr01_G000019	25756	PA_chr01	4033700	snp_25756_PA_chr01:4033700	CpG	4011421	4068670	+	0				1	PA_chr01:827079433-827079433	CpG	PA_chr01	827079433	genic	BREEDING	TMV resistance protein N-like			NB-ARC domain	LEUCINE-RICH REPEAT-CONTAINING PROTEIN	FALSE
PA_chr01_G000019	25757	PA_chr01	4033712	snp_25757_PA_chr01:4033712	CpG	4011421	4068670	+	0	A	T	0.0942029	1	PA_chr01:827079433-827079433	CpG	PA_chr01	827079433	genic	BREEDING	TMV resistance protein N-like			NB-ARC domain	LEUCINE-RICH REPEAT-CONTAINING PROTEIN	FALSE
PA_chr01_G000019	25761	PA_chr01	4033752	snp_25761_PA_chr01:4033752	CpG	4011421	4068670	+	0	A	G	0.620751	1	PA_chr01:827079433-827079433	CpG	PA_chr01	827079433	genic	BREEDING	TMV resistance protein N-like			NB-ARC domain	LEUCINE-RICH REPEAT-CONTAINING PROTEIN	FALSE
PA_chr01_G000019	25763	PA_chr01	4033763	snp_25763_PA_chr01:4033763	CpG	4011421	4068670	+	0	G	A	0.0761062	1	PA_chr01:827079433-827079433	CpG	PA_chr01	827079433	genic	BREEDING	TMV resistance protein N-like			NB-ARC domain	LEUCINE-RICH REPEAT-CONTAINING PROTEIN	FALSE
PA_chr01_G000019	26190	PA_chr01	4033736	snp_26190_PA_chr01:4033736	CpG	4011421	4068670	+	0				1	PA_chr01:836714313-836714313	CpG	PA_chr01	836714313	genic	BREEDING	TMV resistance protein N-like			NB-ARC domain	LEUCINE-RICH REPEAT-CONTAINING PROTEIN	FALSE
PA_chr01_G000019	26387	PA_chr01	4033802	snp_26387_PA_chr01:4033802	CpG	4011421	4068670	+	0	G	A	0.0627209	1	PA_chr01:849659090-849659090	CpG	PA_chr01	849659090	genic	BREEDING	TMV resistance protein N-like			NB-ARC domain	LEUCINE-RICH REPEAT-CONTAINING PROTEIN	FALSE
PA_chr01_G000019	27710	PA_chr01	4033800	snp_27710_PA_chr01:4033800	CpG	4011421	4068670	+	0	C	T	0.129204	1	PA_chr01:885570592-885570592	CpG	PA_chr01	885570592	genic	BREEDING	TMV resistance protein N-like			NB-ARC domain	LEUCINE-RICH REPEAT-CONTAINING PROTEIN	FALSE
PA_chr01_G000019	27779	PA_chr01	4033824	snp_27779_PA_chr01:4033824	CpG	4011421	4068670	+	0	T	C	0.44573	1	PA_chr01:886397343-886397343	CpG	PA_chr01	886397343	genic	BREEDING	TMV resistance protein N-like			NB-ARC domain	LEUCINE-RICH REPEAT-CONTAINING PROTEIN	FALSE
PA_chr01_G000019	27783	PA_chr01	4033848	snp_27783_PA_chr01:4033848	CpG	4011421	4068670	+	0	T	C	0.176732	1	PA_chr01:886397639-886397639	CpG	PA_chr01	886397639	genic	BREEDING	TMV resistance protein N-like			NB-ARC domain	LEUCINE-RICH REPEAT-CONTAINING PROTEIN	FALSE
PA_chr01_G000019	27785	PA_chr01	4033881	snp_27785_PA_chr01:4033881	CpG	4011421	4068670	+	0	C	T	0.0732143	1	PA_chr01:886397639-886397639	CpG	PA_chr01	886397639	genic	BREEDING	TMV resistance protein N-like			NB-ARC domain	LEUCINE-RICH REPEAT-CONTAINING PROTEIN	FALSE
PA_chr01_G000019	28332	PA_chr01	4033716	snp_28332_PA_chr01:4033716	CpG	4011421	4068670	+	0	G	A	0.0911552	1	PA_chr01:897234452-897234452	CpG	PA_chr01	897234452	genic	BREEDING	TMV resistance protein N-like			NB-ARC domain	LEUCINE-RICH REPEAT-CONTAINING PROTEIN	FALSE
PA_chr01_G000019	29892	PA_chr01	4033774	snp_29892_PA_chr01:4033774	CpG	4011421	4068670	+	0	A	T	0.144876	1	PA_chr01:984066209-984066209	CpG	PA_chr01	984066209	genic	BREEDING	TMV resistance protein N-like			NB-ARC domain	LEUCINE-RICH REPEAT-CONTAINING PROTEIN	FALSE
PA_chr01_G000019	29893	PA_chr01	4033779	snp_29893_PA_chr01:4033779	CpG	4011421	4068670	+	0	G	A	0.167257	1	PA_chr01:984066209-984066209	CpG	PA_chr01	984066209	genic	BREEDING	TMV resistance protein N-like			NB-ARC domain	LEUCINE-RICH REPEAT-CONTAINING PROTEIN	FALSE
PA_chr01_G000019	29897	PA_chr01	4033811	snp_29897_PA_chr01:4033811	CpG	4011421	4068670	+	0				1	PA_chr01:984066209-984066209	CpG	PA_chr01	984066209	genic	BREEDING	TMV resistance protein N-like			NB-ARC domain	LEUCINE-RICH REPEAT-CONTAINING PROTEIN	FALSE
PA_chr01_G000019	30256	PA_chr01	4033700	snp_30256_PA_chr01:4033700	CpG	4011421	4068670	+	0				1	PA_chr01:988528339-988528339	CpG	PA_chr01	988528339	genic	BREEDING	TMV resistance protein N-like			NB-ARC domain	LEUCINE-RICH REPEAT-CONTAINING PROTEIN	FALSE
PA_chr01_G000019	30257	PA_chr01	4033712	snp_30257_PA_chr01:4033712	CpG	4011421	4068670	+	0	A	T	0.0942029	1	PA_chr01:988528339-988528339	CpG	PA_chr01	988528339	genic	BREEDING	TMV resistance protein N-like			NB-ARC domain	LEUCINE-RICH REPEAT-CONTAINING PROTEIN	FALSE
PA_chr01_G000019	30258	PA_chr01	4033716	snp_30258_PA_chr01:4033716	CpG	4011421	4068670	+	0	G	A	0.0911552	1	PA_chr01:988528339-988528339	CpG	PA_chr01	988528339	genic	BREEDING	TMV resistance protein N-like			NB-ARC domain	LEUCINE-RICH REPEAT-CONTAINING PROTEIN	FALSE
PA_chr01_G000019	30259	PA_chr01	4033736	snp_30259_PA_chr01:4033736	CpG	4011421	4068670	+	0				1	PA_chr01:988528339-988528339	CpG	PA_chr01	988528339	genic	BREEDING	TMV resistance protein N-like			NB-ARC domain	LEUCINE-RICH REPEAT-CONTAINING PROTEIN	FALSE
PA_chr01_G000019	30261	PA_chr01	4033752	snp_30261_PA_chr01:4033752	CpG	4011421	4068670	+	0	A	G	0.620751	1	PA_chr01:988528339-988528339	CpG	PA_chr01	988528339	genic	BREEDING	TMV resistance protein N-like			NB-ARC domain	LEUCINE-RICH REPEAT-CONTAINING PROTEIN	FALSE
PA_chr01_G000019	30824	PA_chr01	4033774	snp_30824_PA_chr01:4033774	CpG	4011421	4068670	+	0	A	T	0.144876	1	PA_chr01:1004436813-1004436813	CpG	PA_chr01	1004436813	genic	BREEDING	TMV resistance protein N-like			NB-ARC domain	LEUCINE-RICH REPEAT-CONTAINING PROTEIN	FALSE
PA_chr01_G000019	30826	PA_chr01	4033800	snp_30826_PA_chr01:4033800	CpG	4011421	4068670	+	0	C	T	0.129204	1	PA_chr01:1004436813-1004436813	CpG	PA_chr01	1004436813	genic	BREEDING	TMV resistance protein N-like			NB-ARC domain	LEUCINE-RICH REPEAT-CONTAINING PROTEIN	FALSE
PA_chr01_G000019	30837	PA_chr01	4033833	snp_30837_PA_chr01:4033833	CpG	4011421	4068670	+	0	C	T	0.0879219	1	PA_chr01:1004436813-1004436813	CpG	PA_chr01	1004436813	genic	BREEDING	TMV resistance protein N-like			NB-ARC domain	LEUCINE-RICH REPEAT-CONTAINING PROTEIN	FALSE
PA_chr01_G000019	30838	PA_chr01	4033848	snp_30838_PA_chr01:4033848	CpG	4011421	4068670	+	0	T	C	0.176732	1	PA_chr01:1004436813-1004436813	CpG	PA_chr01	1004436813	genic	BREEDING	TMV resistance protein N-like			NB-ARC domain	LEUCINE-RICH REPEAT-CONTAINING PROTEIN	FALSE
PA_chr01_G000019	30839	PA_chr01	4033856	snp_30839_PA_chr01:4033856	CpG	4011421	4068670	+	0	T	A	0.116756	1	PA_chr01:1004436813-1004436813	CpG	PA_chr01	1004436813	genic	BREEDING	TMV resistance protein N-like			NB-ARC domain	LEUCINE-RICH REPEAT-CONTAINING PROTEIN	FALSE
PA_chr01_G000019	31398	PA_chr01	4033889	snp_31398_PA_chr01:4033889	CpG	4011421	4068670	+	0				1	PA_chr01:1034220058-1034220058	CpG	PA_chr01	1034220058	genic	BREEDING	TMV resistance protein N-like			NB-ARC domain	LEUCINE-RICH REPEAT-CONTAINING PROTEIN	FALSE
PA_chr01_G000019	31403	PA_chr01	4060593	snp_31403_PA_chr01:4060593	CpG	4011421	4068670	+	0	A	G	0.0772727	1	PA_chr01:1034220058-1034220058	CpG	PA_chr01	1034220058	genic	BREEDING	TMV resistance protein N-like			NB-ARC domain	LEUCINE-RICH REPEAT-CONTAINING PROTEIN	FALSE
PA_chr01_G000019	31404	PA_chr01	4060605	snp_31404_PA_chr01:4060605	CpG	4011421	4068670	+	0				1	PA_chr01:1034220058-1034220058	CpG	PA_chr01	1034220058	genic	BREEDING	TMV resistance protein N-like			NB-ARC domain	LEUCINE-RICH REPEAT-CONTAINING PROTEIN	FALSE
PA_chr01_G000019	31942	PA_chr01	4033754	snp_31942_PA_chr01:4033754	CpG	4011421	4068670	+	0				1	PA_chr01:1068404642-1068404642	CpG	PA_chr01	1068404642	genic	BREEDING	TMV resistance protein N-like			NB-ARC domain	LEUCINE-RICH REPEAT-CONTAINING PROTEIN	FALSE
PA_chr01_G000019	31945	PA_chr01	4033774	snp_31945_PA_chr01:4033774	CpG	4011421	4068670	+	0	A	T	0.144876	1	PA_chr01:1068404642-1068404642	CpG	PA_chr01	1068404642	genic	BREEDING	TMV resistance protein N-like			NB-ARC domain	LEUCINE-RICH REPEAT-CONTAINING PROTEIN	FALSE
PA_chr01_G000019	31946	PA_chr01	4033779	snp_31946_PA_chr01:4033779	CpG	4011421	4068670	+	0	G	A	0.167257	1	PA_chr01:1068404642-1068404642	CpG	PA_chr01	1068404642	genic	BREEDING	TMV resistance protein N-like			NB-ARC domain	LEUCINE-RICH REPEAT-CONTAINING PROTEIN	FALSE
PA_chr01_G000019	31948	PA_chr01	4033802	snp_31948_PA_chr01:4033802	CpG	4011421	4068670	+	0	G	A	0.0627209	1	PA_chr01:1068404642-1068404642	CpG	PA_chr01	1068404642	genic	BREEDING	TMV resistance protein N-like			NB-ARC domain	LEUCINE-RICH REPEAT-CONTAINING PROTEIN	FALSE
PA_chr01_G000019	31966	PA_chr01	4060585	snp_31966_PA_chr01:4060585	CpG	4011421	4068670	+	0	G	C	0.0741758	1	PA_chr01:1068404642-1068404642	CpG	PA_chr01	1068404642	genic	BREEDING	TMV resistance protein N-like			NB-ARC domain	LEUCINE-RICH REPEAT-CONTAINING PROTEIN	FALSE
PA_chr01_G000019	31967	PA_chr01	4060593	snp_31967_PA_chr01:4060593	CpG	4011421	4068670	+	0	A	G	0.0772727	1	PA_chr01:1068404642-1068404642	CpG	PA_chr01	1068404642	genic	BREEDING	TMV resistance protein N-like			NB-ARC domain	LEUCINE-RICH REPEAT-CONTAINING PROTEIN	FALSE
PA_chr01_G000019	3236	PA_chr01	4060746	snp_3236_PA_chr01:4060746	CpG	4011421	4068670	+	0				1	PA_chr01:100067116-100067116	CpG	PA_chr01	100067116	genic	BREEDING	TMV resistance protein N-like			NB-ARC domain	LEUCINE-RICH REPEAT-CONTAINING PROTEIN	FALSE
PA_chr01_G000019	32876	PA_chr01	4033803	snp_32876_PA_chr01:4033803	CpG	4011421	4068670	+	0				1	PA_chr01:1086342062-1086342062	CpG	PA_chr01	1086342062	genic	BREEDING	TMV resistance protein N-like			NB-ARC domain	LEUCINE-RICH REPEAT-CONTAINING PROTEIN	FALSE
PA_chr01_G000019	34604	PA_chr01	4033800	snp_34604_PA_chr01:4033800	CpG	4011421	4068670	+	0	C	T	0.129204	1	PA_chr01:1132846467-1132846467	CpG	PA_chr01	1132846467	genic	BREEDING	TMV resistance protein N-like			NB-ARC domain	LEUCINE-RICH REPEAT-CONTAINING PROTEIN	FALSE
PA_chr01_G000019	35589	PA_chr01	4033716	snp_35589_PA_chr01:4033716	CpG	4011421	4068670	+	0	G	A	0.0911552	1	PA_chr01:1170612257-1170612257	CpG	PA_chr01	1170612257	genic	BREEDING	TMV resistance protein N-like			NB-ARC domain	LEUCINE-RICH REPEAT-CONTAINING PROTEIN	FALSE
PA_chr01_G000019	36817	PA_chr01	4033736	snp_36817_PA_chr01:4033736	CpG	4011421	4068670	+	0				1	PA_chr01:1224017925-1224017925	CpG	PA_chr01	1224017925	genic	BREEDING	TMV resistance protein N-like			NB-ARC domain	LEUCINE-RICH REPEAT-CONTAINING PROTEIN	FALSE
PA_chr01_G000019	36819	PA_chr01	4033752	snp_36819_PA_chr01:4033752	CpG	4011421	4068670	+	0	A	G	0.620751	1	PA_chr01:1224017896-1224017896	CpG	PA_chr01	1224017896	genic	BREEDING	TMV resistance protein N-like			NB-ARC domain	LEUCINE-RICH REPEAT-CONTAINING PROTEIN	FALSE
PA_chr01_G000019	36820	PA_chr01	4033754	snp_36820_PA_chr01:4033754	CpG	4011421	4068670	+	0				1	PA_chr01:1224017925-1224017925	CpG	PA_chr01	1224017925	genic	BREEDING	TMV resistance protein N-like			NB-ARC domain	LEUCINE-RICH REPEAT-CONTAINING PROTEIN	FALSE
PA_chr01_G000019	36822	PA_chr01	4033765	snp_36822_PA_chr01:4033765	CpG	4011421	4068670	+	0	G	A	0.060177	1	PA_chr01:1224017925-1224017925	CpG	PA_chr01	1224017925	genic	BREEDING	TMV resistance protein N-like			NB-ARC domain	LEUCINE-RICH REPEAT-CONTAINING PROTEIN	FALSE
PA_chr01_G000019	36823	PA_chr01	4033774	snp_36823_PA_chr01:4033774	CpG	4011421	4068670	+	0	A	T	0.144876	1	PA_chr01:1224017994-1224017994	CpG	PA_chr01	1224017994	genic	BREEDING	TMV resistance protein N-like			NB-ARC domain	LEUCINE-RICH REPEAT-CONTAINING PROTEIN	FALSE
PA_chr01_G000019	36824	PA_chr01	4033779	snp_36824_PA_chr01:4033779	CpG	4011421	4068670	+	0	G	A	0.167257	1	PA_chr01:1224018035-1224018035	CpG	PA_chr01	1224018035	genic	BREEDING	TMV resistance protein N-like			NB-ARC domain	LEUCINE-RICH REPEAT-CONTAINING PROTEIN	FALSE
PA_chr01_G000019	3700	PA_chr01	4033881	snp_3700_PA_chr01:4033881	CpG	4011421	4068670	+	0	C	T	0.0732143	1	PA_chr01:116888177-116888177	CpG	PA_chr01	116888177	genic	BREEDING	TMV resistance protein N-like			NB-ARC domain	LEUCINE-RICH REPEAT-CONTAINING PROTEIN	FALSE
PA_chr01_G000019	3702	PA_chr01	4033912	snp_3702_PA_chr01:4033912	CpG	4011421	4068670	+	0				1	PA_chr01:116888177-116888177	CpG	PA_chr01	116888177	genic	BREEDING	TMV resistance protein N-like			NB-ARC domain	LEUCINE-RICH REPEAT-CONTAINING PROTEIN	FALSE
PA_chr01_G000019	3734	PA_chr01	4033889	snp_3734_PA_chr01:4033889	CpG	4011421	4068670	+	0				1	PA_chr01:117514165-117514165	CpG	PA_chr01	117514165	genic	BREEDING	TMV resistance protein N-like			NB-ARC domain	LEUCINE-RICH REPEAT-CONTAINING PROTEIN	FALSE
PA_chr01_G000019	3742	PA_chr01	4060621	snp_3742_PA_chr01:4060621	CpG	4011421	4068670	+	0	C	G	0.072973	1	PA_chr01:117514165-117514165	CpG	PA_chr01	117514165	genic	BREEDING	TMV resistance protein N-like			NB-ARC domain	LEUCINE-RICH REPEAT-CONTAINING PROTEIN	FALSE
PA_chr01_G000019	42594	PA_chr01	4033779	snp_42594_PA_chr01:4033779	CpG	4011421	4068670	+	0	G	A	0.167257	1	PA_chr01:1455376968-1455376968	CpG	PA_chr01	1455376968	genic	BREEDING	TMV resistance protein N-like			NB-ARC domain	LEUCINE-RICH REPEAT-CONTAINING PROTEIN	FALSE
PA_chr01_G000019	42712	PA_chr01	4033774	snp_42712_PA_chr01:4033774	CpG	4011421	4068670	+	0	A	T	0.144876	1	PA_chr01:1465233615-1465233615	CpG	PA_chr01	1465233615	genic	BREEDING	TMV resistance protein N-like			NB-ARC domain	LEUCINE-RICH REPEAT-CONTAINING PROTEIN	FALSE
PA_chr01_G000019	42759	PA_chr01	4033751	snp_42759_PA_chr01:4033751	CpG	4011421	4068670	+	0	C	T	0.123214	1	PA_chr01:1465706408-1465706408	CpG	PA_chr01	1465706408	genic	BREEDING	TMV resistance protein N-like			NB-ARC domain	LEUCINE-RICH REPEAT-CONTAINING PROTEIN	FALSE
PA_chr01_G000019	42795	PA_chr01	4060761	snp_42795_PA_chr01:4060761	CpG	4011421	4068670	+	0	G	A	0.057971	1	PA_chr01:1465706408-1465706408	CpG	PA_chr01	1465706408	genic	BREEDING	TMV resistance protein N-like			NB-ARC domain	LEUCINE-RICH REPEAT-CONTAINING PROTEIN	FALSE
PA_chr01_G000019	42837	PA_chr01	4033815	snp_42837_PA_chr01:4033815	CpG	4011421	4068670	+	0				1	PA_chr01:1467069023-1467069023	CpG	PA_chr01	1467069023	genic	BREEDING	TMV resistance protein N-like			NB-ARC domain	LEUCINE-RICH REPEAT-CONTAINING PROTEIN	FALSE
PA_chr01_G000019	43041	PA_chr01	4033712	snp_43041_PA_chr01:4033712	CpG	4011421	4068670	+	0	A	T	0.0942029	1	PA_chr01:1473310131-1473310131	CpG	PA_chr01	1473310131	genic	BREEDING	TMV resistance protein N-like			NB-ARC domain	LEUCINE-RICH REPEAT-CONTAINING PROTEIN	FALSE
PA_chr01_G000019	43043	PA_chr01	4033736	snp_43043_PA_chr01:4033736	CpG	4011421	4068670	+	0				1	PA_chr01:1473310131-1473310131	CpG	PA_chr01	1473310131	genic	BREEDING	TMV resistance protein N-like			NB-ARC domain	LEUCINE-RICH REPEAT-CONTAINING PROTEIN	FALSE
PA_chr01_G000019	43055	PA_chr01	4033812	snp_43055_PA_chr01:4033812	CpG	4011421	4068670	+	0	G	C	0.102837	1	PA_chr01:1473310131-1473310131	CpG	PA_chr01	1473310131	genic	BREEDING	TMV resistance protein N-like			NB-ARC domain	LEUCINE-RICH REPEAT-CONTAINING PROTEIN	FALSE
PA_chr01_G000019	43057	PA_chr01	4033817	snp_43057_PA_chr01:4033817	CpG	4011421	4068670	+	0	A	G	0.140071	1	PA_chr01:1473310131-1473310131	CpG	PA_chr01	1473310131	genic	BREEDING	TMV resistance protein N-like			NB-ARC domain	LEUCINE-RICH REPEAT-CONTAINING PROTEIN	FALSE
PA_chr01_G000019	43189	PA_chr01	4033889	snp_43189_PA_chr01:4033889	CpG	4011421	4068670	+	0				1	PA_chr01:1474780604-1474780604	CpG	PA_chr01	1474780604	genic	BREEDING	TMV resistance protein N-like			NB-ARC domain	LEUCINE-RICH REPEAT-CONTAINING PROTEIN	FALSE
PA_chr01_G000019	43191	PA_chr01	4033920	snp_43191_PA_chr01:4033920	CpG	4011421	4068670	+	0				1	PA_chr01:1474780604-1474780604	CpG	PA_chr01	1474780604	genic	BREEDING	TMV resistance protein N-like			NB-ARC domain	LEUCINE-RICH REPEAT-CONTAINING PROTEIN	FALSE
PA_chr01_G000019	43192	PA_chr01	4033945	snp_43192_PA_chr01:4033945	CpG	4011421	4068670	+	0	C	T	0.0738007	1	PA_chr01:1474780604-1474780604	CpG	PA_chr01	1474780604	genic	BREEDING	TMV resistance protein N-like			NB-ARC domain	LEUCINE-RICH REPEAT-CONTAINING PROTEIN	FALSE
PA_chr01_G000019	44686	PA_chr01	4033754	snp_44686_PA_chr01:4033754	CpG	4011421	4068670	+	0				1	PA_chr01:1548323198-1548323198	CpG	PA_chr01	1548323198	genic	BREEDING	TMV resistance protein N-like			NB-ARC domain	LEUCINE-RICH REPEAT-CONTAINING PROTEIN	FALSE
PA_chr01_G000019	44693	PA_chr01	4033803	snp_44693_PA_chr01:4033803	CpG	4011421	4068670	+	0				1	PA_chr01:1548323198-1548323198	CpG	PA_chr01	1548323198	genic	BREEDING	TMV resistance protein N-like			NB-ARC domain	LEUCINE-RICH REPEAT-CONTAINING PROTEIN	FALSE
PA_chr01_G000019	4590	PA_chr01	4033920	snp_4590_PA_chr01:4033920	CpG	4011421	4068670	+	0				1	PA_chr01:154452213-154452213	CpG	PA_chr01	154452213	genic	BREEDING	TMV resistance protein N-like			NB-ARC domain	LEUCINE-RICH REPEAT-CONTAINING PROTEIN	FALSE
PA_chr01_G000019	46522	PA_chr01	4033800	snp_46522_PA_chr01:4033800	CpG	4011421	4068670	+	0	C	T	0.129204	1	PA_chr01:1627984911-1627984911	CpG	PA_chr01	1627984911	genic	BREEDING	TMV resistance protein N-like			NB-ARC domain	LEUCINE-RICH REPEAT-CONTAINING PROTEIN	FALSE
PA_chr01_G000019	46778	PA_chr01	4033700	snp_46778_PA_chr01:4033700	CpG	4011421	4068670	+	0				1	PA_chr01:1634911293-1634911293	CpG	PA_chr01	1634911293	genic	BREEDING	TMV resistance protein N-like			NB-ARC domain	LEUCINE-RICH REPEAT-CONTAINING PROTEIN	FALSE
PA_chr01_G000019	5077	PA_chr01	4033754	snp_5077_PA_chr01:4033754	CpG	4011421	4068670	+	0				1	PA_chr01:164568848-164568848	CpG	PA_chr01	164568848	genic	BREEDING	TMV resistance protein N-like			NB-ARC domain	LEUCINE-RICH REPEAT-CONTAINING PROTEIN	FALSE
PA_chr01_G000019	8206	PA_chr01	4033945	snp_8206_PA_chr01:4033945	CpG	4011421	4068670	+	0	C	T	0.0738007	1	PA_chr01:231299882-231299882	CpG	PA_chr01	231299882	genic	BREEDING	TMV resistance protein N-like			NB-ARC domain	LEUCINE-RICH REPEAT-CONTAINING PROTEIN	FALSE
PA_chr01_G000019	8666	PA_chr01	4033815	snp_8666_PA_chr01:4033815	CpG	4011421	4068670	+	0				1	PA_chr01:257696912-257696912	CpG	PA_chr01	257696912	genic	BREEDING	TMV resistance protein N-like			NB-ARC domain	LEUCINE-RICH REPEAT-CONTAINING PROTEIN	FALSE
PA_chr01_G000019	8667	PA_chr01	4033817	snp_8667_PA_chr01:4033817	CpG	4011421	4068670	+	0	A	G	0.140071	1	PA_chr01:257697022-257697022	CpG	PA_chr01	257697022	genic	BREEDING	TMV resistance protein N-like			NB-ARC domain	LEUCINE-RICH REPEAT-CONTAINING PROTEIN	FALSE
PA_chr01_G000019	8671	PA_chr01	4033829	snp_8671_PA_chr01:4033829	CpG	4011421	4068670	+	0	C	A	0.92959	1	PA_chr01:257697022-257697022	CpG	PA_chr01	257697022	genic	BREEDING	TMV resistance protein N-like			NB-ARC domain	LEUCINE-RICH REPEAT-CONTAINING PROTEIN	FALSE
PA_chr01_G000019	8680	PA_chr01	4060585	snp_8680_PA_chr01:4060585	CpG	4011421	4068670	+	0	G	C	0.0741758	1	PA_chr01:257697086-257697086	CpG	PA_chr01	257697086	genic	BREEDING	TMV resistance protein N-like			NB-ARC domain	LEUCINE-RICH REPEAT-CONTAINING PROTEIN	FALSE
PA_chr01_G000019	9305	PA_chr01	4033716	snp_9305_PA_chr01:4033716	CpG	4011421	4068670	+	0	G	A	0.0911552	1	PA_chr01:283689989-283689989	CpG	PA_chr01	283689989	genic	BREEDING	TMV resistance protein N-like			NB-ARC domain	LEUCINE-RICH REPEAT-CONTAINING PROTEIN	FALSE
PA_chr01_G000019	9307	PA_chr01	4033751	snp_9307_PA_chr01:4033751	CpG	4011421	4068670	+	0	C	T	0.123214	1	PA_chr01:283689989-283689989	CpG	PA_chr01	283689989	genic	BREEDING	TMV resistance protein N-like			NB-ARC domain	LEUCINE-RICH REPEAT-CONTAINING PROTEIN	FALSE
PA_chr01_G000019	53911	PA_chr01	4033826	snp_53911_PA_chr01:4033826	CHG	4011421	4068670	+	0				47	PA_chr01:1636993871-1636993871;PA_chr01:1636993885-1636993885;PA_chr01:1636993893-1636993893;PA_chr01:1636993907-1636993907;PA_chr01:1636993936-1636993936;PA_chr01:1636993960-1636993960;PA_chr01:1636993992-1636993992;PA_chr01:1636994008-1636994008;PA_chr01:1636994027-1636994027;PA_chr01:1636994049-1636994049;PA_chr01:1636994061-1636994061;PA_chr01:1636994064-1636994064;PA_chr01:1636994073-1636994…	CHG;CHH;CpG	PA_chr01	1636993871;1636993885;1636993893;1636993907;1636993936;1636993960;1636993992;1636994008;1636994027;1636994049;1636994061;1636994064;1636994073;1636994081;1636994084;1636994087;1636994096;1636994104;1636994130;1636994137;1636994143;1636994146;1636994156;1636994159;1636994165;1636994168;1636994175;1636994192;1636994199;1636994216;1636994223;1636994240;1636994247;1636994264;1636994271;1636994292;163…	genic	NATURAL	TMV resistance protein N-like			NB-ARC domain	LEUCINE-RICH REPEAT-CONTAINING PROTEIN	FALSE
PA_chr01_G000019	53911	PA_chr01	4033826	snp_53911_PA_chr01:4033826	CHG	4011421	4068670	+	0				47	PA_chr01:1636993871-1636993871;PA_chr01:1636993885-1636993885;PA_chr01:1636993893-1636993893;PA_chr01:1636993907-1636993907;PA_chr01:1636993936-1636993936;PA_chr01:1636993960-1636993960;PA_chr01:1636993992-1636993992;PA_chr01:1636994008-1636994008;PA_chr01:1636994027-1636994027;PA_chr01:1636994049-1636994049;PA_chr01:1636994061-1636994061;PA_chr01:1636994064-1636994064;PA_chr01:1636994073-1636994…	CHG;CHH;CpG	PA_chr01	1636993871;1636993885;1636993893;1636993907;1636993936;1636993960;1636993992;1636994008;1636994027;1636994049;1636994061;1636994064;1636994073;1636994081;1636994084;1636994087;1636994096;1636994104;1636994130;1636994137;1636994143;1636994146;1636994156;1636994159;1636994165;1636994168;1636994175;1636994192;1636994199;1636994216;1636994223;1636994240;1636994247;1636994264;1636994271;1636994292;163…	genic	NATURAL	TMV resistance protein N-like			NB-ARC domain	LEUCINE-RICH REPEAT-CONTAINING PROTEIN	FALSE
PA_chr01_G000019	53911	PA_chr01	4033826	snp_53911_PA_chr01:4033826	CHG	4011421	4068670	+	0				47	PA_chr01:1636993871-1636993871;PA_chr01:1636993885-1636993885;PA_chr01:1636993893-1636993893;PA_chr01:1636993907-1636993907;PA_chr01:1636993936-1636993936;PA_chr01:1636993960-1636993960;PA_chr01:1636993992-1636993992;PA_chr01:1636994008-1636994008;PA_chr01:1636994027-1636994027;PA_chr01:1636994049-1636994049;PA_chr01:1636994061-1636994061;PA_chr01:1636994064-1636994064;PA_chr01:1636994073-1636994…	CHG;CHH;CpG	PA_chr01	1636993871;1636993885;1636993893;1636993907;1636993936;1636993960;1636993992;1636994008;1636994027;1636994049;1636994061;1636994064;1636994073;1636994081;1636994084;1636994087;1636994096;1636994104;1636994130;1636994137;1636994143;1636994146;1636994156;1636994159;1636994165;1636994168;1636994175;1636994192;1636994199;1636994216;1636994223;1636994240;1636994247;1636994264;1636994271;1636994292;163…	genic	NATURAL	TMV resistance protein N-like			NB-ARC domain	LEUCINE-RICH REPEAT-CONTAINING PROTEIN	FALSE
PA_chr01_G000019	53911	PA_chr01	4033826	snp_53911_PA_chr01:4033826	CHH	4011421	4068670	+	0				47	PA_chr01:1636993871-1636993871;PA_chr01:1636993885-1636993885;PA_chr01:1636993893-1636993893;PA_chr01:1636993907-1636993907;PA_chr01:1636993936-1636993936;PA_chr01:1636993960-1636993960;PA_chr01:1636993992-1636993992;PA_chr01:1636994008-1636994008;PA_chr01:1636994027-1636994027;PA_chr01:1636994049-1636994049;PA_chr01:1636994061-1636994061;PA_chr01:1636994064-1636994064;PA_chr01:1636994073-1636994…	CHG;CHH;CpG	PA_chr01	1636993871;1636993885;1636993893;1636993907;1636993936;1636993960;1636993992;1636994008;1636994027;1636994049;1636994061;1636994064;1636994073;1636994081;1636994084;1636994087;1636994096;1636994104;1636994130;1636994137;1636994143;1636994146;1636994156;1636994159;1636994165;1636994168;1636994175;1636994192;1636994199;1636994216;1636994223;1636994240;1636994247;1636994264;1636994271;1636994292;163…	genic	NATURAL	TMV resistance protein N-like			NB-ARC domain	LEUCINE-RICH REPEAT-CONTAINING PROTEIN	FALSE
PA_chr01_G000019	53911	PA_chr01	4033826	snp_53911_PA_chr01:4033826	CHH	4011421	4068670	+	0				47	PA_chr01:1636993871-1636993871;PA_chr01:1636993885-1636993885;PA_chr01:1636993893-1636993893;PA_chr01:1636993907-1636993907;PA_chr01:1636993936-1636993936;PA_chr01:1636993960-1636993960;PA_chr01:1636993992-1636993992;PA_chr01:1636994008-1636994008;PA_chr01:1636994027-1636994027;PA_chr01:1636994049-1636994049;PA_chr01:1636994061-1636994061;PA_chr01:1636994064-1636994064;PA_chr01:1636994073-1636994…	CHG;CHH;CpG	PA_chr01	1636993871;1636993885;1636993893;1636993907;1636993936;1636993960;1636993992;1636994008;1636994027;1636994049;1636994061;1636994064;1636994073;1636994081;1636994084;1636994087;1636994096;1636994104;1636994130;1636994137;1636994143;1636994146;1636994156;1636994159;1636994165;1636994168;1636994175;1636994192;1636994199;1636994216;1636994223;1636994240;1636994247;1636994264;1636994271;1636994292;163…	genic	NATURAL	TMV resistance protein N-like			NB-ARC domain	LEUCINE-RICH REPEAT-CONTAINING PROTEIN	FALSE
PA_chr01_G000019	53911	PA_chr01	4033826	snp_53911_PA_chr01:4033826	CHH	4011421	4068670	+	0				47	PA_chr01:1636993871-1636993871;PA_chr01:1636993885-1636993885;PA_chr01:1636993893-1636993893;PA_chr01:1636993907-1636993907;PA_chr01:1636993936-1636993936;PA_chr01:1636993960-1636993960;PA_chr01:1636993992-1636993992;PA_chr01:1636994008-1636994008;PA_chr01:1636994027-1636994027;PA_chr01:1636994049-1636994049;PA_chr01:1636994061-1636994061;PA_chr01:1636994064-1636994064;PA_chr01:1636994073-1636994…	CHG;CHH;CpG	PA_chr01	1636993871;1636993885;1636993893;1636993907;1636993936;1636993960;1636993992;1636994008;1636994027;1636994049;1636994061;1636994064;1636994073;1636994081;1636994084;1636994087;1636994096;1636994104;1636994130;1636994137;1636994143;1636994146;1636994156;1636994159;1636994165;1636994168;1636994175;1636994192;1636994199;1636994216;1636994223;1636994240;1636994247;1636994264;1636994271;1636994292;163…	genic	NATURAL	TMV resistance protein N-like			NB-ARC domain	LEUCINE-RICH REPEAT-CONTAINING PROTEIN	FALSE
PA_chr01_G000019	53911	PA_chr01	4033826	snp_53911_PA_chr01:4033826	CpG	4011421	4068670	+	0				47	PA_chr01:1636993871-1636993871;PA_chr01:1636993885-1636993885;PA_chr01:1636993893-1636993893;PA_chr01:1636993907-1636993907;PA_chr01:1636993936-1636993936;PA_chr01:1636993960-1636993960;PA_chr01:1636993992-1636993992;PA_chr01:1636994008-1636994008;PA_chr01:1636994027-1636994027;PA_chr01:1636994049-1636994049;PA_chr01:1636994061-1636994061;PA_chr01:1636994064-1636994064;PA_chr01:1636994073-1636994…	CHG;CHH;CpG	PA_chr01	1636993871;1636993885;1636993893;1636993907;1636993936;1636993960;1636993992;1636994008;1636994027;1636994049;1636994061;1636994064;1636994073;1636994081;1636994084;1636994087;1636994096;1636994104;1636994130;1636994137;1636994143;1636994146;1636994156;1636994159;1636994165;1636994168;1636994175;1636994192;1636994199;1636994216;1636994223;1636994240;1636994247;1636994264;1636994271;1636994292;163…	genic	NATURAL	TMV resistance protein N-like			NB-ARC domain	LEUCINE-RICH REPEAT-CONTAINING PROTEIN	FALSE
PA_chr01_G000019	53911	PA_chr01	4033826	snp_53911_PA_chr01:4033826	CpG	4011421	4068670	+	0				47	PA_chr01:1636993871-1636993871;PA_chr01:1636993885-1636993885;PA_chr01:1636993893-1636993893;PA_chr01:1636993907-1636993907;PA_chr01:1636993936-1636993936;PA_chr01:1636993960-1636993960;PA_chr01:1636993992-1636993992;PA_chr01:1636994008-1636994008;PA_chr01:1636994027-1636994027;PA_chr01:1636994049-1636994049;PA_chr01:1636994061-1636994061;PA_chr01:1636994064-1636994064;PA_chr01:1636994073-1636994…	CHG;CHH;CpG	PA_chr01	1636993871;1636993885;1636993893;1636993907;1636993936;1636993960;1636993992;1636994008;1636994027;1636994049;1636994061;1636994064;1636994073;1636994081;1636994084;1636994087;1636994096;1636994104;1636994130;1636994137;1636994143;1636994146;1636994156;1636994159;1636994165;1636994168;1636994175;1636994192;1636994199;1636994216;1636994223;1636994240;1636994247;1636994264;1636994271;1636994292;163…	genic	NATURAL	TMV resistance protein N-like			NB-ARC domain	LEUCINE-RICH REPEAT-CONTAINING PROTEIN	FALSE
PA_chr01_G000019	53911	PA_chr01	4033826	snp_53911_PA_chr01:4033826	CpG	4011421	4068670	+	0				47	PA_chr01:1636993871-1636993871;PA_chr01:1636993885-1636993885;PA_chr01:1636993893-1636993893;PA_chr01:1636993907-1636993907;PA_chr01:1636993936-1636993936;PA_chr01:1636993960-1636993960;PA_chr01:1636993992-1636993992;PA_chr01:1636994008-1636994008;PA_chr01:1636994027-1636994027;PA_chr01:1636994049-1636994049;PA_chr01:1636994061-1636994061;PA_chr01:1636994064-1636994064;PA_chr01:1636994073-1636994…	CHG;CHH;CpG	PA_chr01	1636993871;1636993885;1636993893;1636993907;1636993936;1636993960;1636993992;1636994008;1636994027;1636994049;1636994061;1636994064;1636994073;1636994081;1636994084;1636994087;1636994096;1636994104;1636994130;1636994137;1636994143;1636994146;1636994156;1636994159;1636994165;1636994168;1636994175;1636994192;1636994199;1636994216;1636994223;1636994240;1636994247;1636994264;1636994271;1636994292;163…	genic	NATURAL	TMV resistance protein N-like			NB-ARC domain	LEUCINE-RICH REPEAT-CONTAINING PROTEIN	FALSE
PA_chr01_G000019	53898	PA_chr01	4033765	snp_53898_PA_chr01:4033765	CHG	4011421	4068670	+	0	G	A	0.060177	37	PA_chr01:1636993871-1636993871;PA_chr01:1636993893-1636993893;PA_chr01:1636993907-1636993907;PA_chr01:1636993936-1636993936;PA_chr01:1636994008-1636994008;PA_chr01:1636994027-1636994027;PA_chr01:1636994049-1636994049;PA_chr01:1636994061-1636994061;PA_chr01:1636994064-1636994064;PA_chr01:1636994073-1636994073;PA_chr01:1636994081-1636994081;PA_chr01:1636994084-1636994084;PA_chr01:1636994087-1636994…	CHG;CpG	PA_chr01	1636993871;1636993893;1636993907;1636993936;1636994008;1636994027;1636994049;1636994061;1636994064;1636994073;1636994081;1636994084;1636994087;1636994096;1636994104;1636994143;1636994156;1636994165;1636994168;1636994175;1636994192;1636994199;1636994216;1636994223;1636994240;1636994247;1636994264;1636994271;1636994292;1636994299;1636994307;1636994319;1636994349;1636994352;1636994353;1636994355;163…	genic	NATURAL	TMV resistance protein N-like			NB-ARC domain	LEUCINE-RICH REPEAT-CONTAINING PROTEIN	FALSE
PA_chr01_G000019	53898	PA_chr01	4033765	snp_53898_PA_chr01:4033765	CHG	4011421	4068670	+	0	G	A	0.060177	37	PA_chr01:1636993871-1636993871;PA_chr01:1636993893-1636993893;PA_chr01:1636993907-1636993907;PA_chr01:1636993936-1636993936;PA_chr01:1636994008-1636994008;PA_chr01:1636994027-1636994027;PA_chr01:1636994049-1636994049;PA_chr01:1636994061-1636994061;PA_chr01:1636994064-1636994064;PA_chr01:1636994073-1636994073;PA_chr01:1636994081-1636994081;PA_chr01:1636994084-1636994084;PA_chr01:1636994087-1636994…	CHG;CpG	PA_chr01	1636993871;1636993893;1636993907;1636993936;1636994008;1636994027;1636994049;1636994061;1636994064;1636994073;1636994081;1636994084;1636994087;1636994096;1636994104;1636994143;1636994156;1636994165;1636994168;1636994175;1636994192;1636994199;1636994216;1636994223;1636994240;1636994247;1636994264;1636994271;1636994292;1636994299;1636994307;1636994319;1636994349;1636994352;1636994353;1636994355;163…	genic	NATURAL	TMV resistance protein N-like			NB-ARC domain	LEUCINE-RICH REPEAT-CONTAINING PROTEIN	FALSE
PA_chr01_G000019	53898	PA_chr01	4033765	snp_53898_PA_chr01:4033765	CpG	4011421	4068670	+	0	G	A	0.060177	37	PA_chr01:1636993871-1636993871;PA_chr01:1636993893-1636993893;PA_chr01:1636993907-1636993907;PA_chr01:1636993936-1636993936;PA_chr01:1636994008-1636994008;PA_chr01:1636994027-1636994027;PA_chr01:1636994049-1636994049;PA_chr01:1636994061-1636994061;PA_chr01:1636994064-1636994064;PA_chr01:1636994073-1636994073;PA_chr01:1636994081-1636994081;PA_chr01:1636994084-1636994084;PA_chr01:1636994087-1636994…	CHG;CpG	PA_chr01	1636993871;1636993893;1636993907;1636993936;1636994008;1636994027;1636994049;1636994061;1636994064;1636994073;1636994081;1636994084;1636994087;1636994096;1636994104;1636994143;1636994156;1636994165;1636994168;1636994175;1636994192;1636994199;1636994216;1636994223;1636994240;1636994247;1636994264;1636994271;1636994292;1636994299;1636994307;1636994319;1636994349;1636994352;1636994353;1636994355;163…	genic	NATURAL	TMV resistance protein N-like			NB-ARC domain	LEUCINE-RICH REPEAT-CONTAINING PROTEIN	FALSE
PA_chr01_G000019	53898	PA_chr01	4033765	snp_53898_PA_chr01:4033765	CpG	4011421	4068670	+	0	G	A	0.060177	37	PA_chr01:1636993871-1636993871;PA_chr01:1636993893-1636993893;PA_chr01:1636993907-1636993907;PA_chr01:1636993936-1636993936;PA_chr01:1636994008-1636994008;PA_chr01:1636994027-1636994027;PA_chr01:1636994049-1636994049;PA_chr01:1636994061-1636994061;PA_chr01:1636994064-1636994064;PA_chr01:1636994073-1636994073;PA_chr01:1636994081-1636994081;PA_chr01:1636994084-1636994084;PA_chr01:1636994087-1636994…	CHG;CpG	PA_chr01	1636993871;1636993893;1636993907;1636993936;1636994008;1636994027;1636994049;1636994061;1636994064;1636994073;1636994081;1636994084;1636994087;1636994096;1636994104;1636994143;1636994156;1636994165;1636994168;1636994175;1636994192;1636994199;1636994216;1636994223;1636994240;1636994247;1636994264;1636994271;1636994292;1636994299;1636994307;1636994319;1636994349;1636994352;1636994353;1636994355;163…	genic	NATURAL	TMV resistance protein N-like			NB-ARC domain	LEUCINE-RICH REPEAT-CONTAINING PROTEIN	FALSE
PA_chr01_G000019	9942	PA_chr01	4033848	snp_9942_PA_chr01:4033848	CHG	4011421	4068670	+	0	T	C	0.176732	19	PA_chr01:257696581-257696581;PA_chr01:257696936-257696936;PA_chr01:257696940-257696940;PA_chr01:257696954-257696954;PA_chr01:257696957-257696957;PA_chr01:257696980-257696980;PA_chr01:257696993-257696993;PA_chr01:257696997-257696997;PA_chr01:257697029-257697029;PA_chr01:257697033-257697033;PA_chr01:257697055-257697055;PA_chr01:257697068-257697068;PA_chr01:257697079-257697079;PA_chr01:257697083-257…	CHG;CHH;CpG	PA_chr01	257696581;257696936;257696940;257696954;257696957;257696980;257696993;257696997;257697029;257697033;257697055;257697068;257697079;257697083;257697091;257697100;257697126;257697130;257697143	genic	NATURAL	TMV resistance protein N-like			NB-ARC domain	LEUCINE-RICH REPEAT-CONTAINING PROTEIN	FALSE
PA_chr01_G000019	9942	PA_chr01	4033848	snp_9942_PA_chr01:4033848	CHG	4011421	4068670	+	0	T	C	0.176732	19	PA_chr01:257696581-257696581;PA_chr01:257696936-257696936;PA_chr01:257696940-257696940;PA_chr01:257696954-257696954;PA_chr01:257696957-257696957;PA_chr01:257696980-257696980;PA_chr01:257696993-257696993;PA_chr01:257696997-257696997;PA_chr01:257697029-257697029;PA_chr01:257697033-257697033;PA_chr01:257697055-257697055;PA_chr01:257697068-257697068;PA_chr01:257697079-257697079;PA_chr01:257697083-257…	CHG;CHH;CpG	PA_chr01	257696581;257696936;257696940;257696954;257696957;257696980;257696993;257696997;257697029;257697033;257697055;257697068;257697079;257697083;257697091;257697100;257697126;257697130;257697143	genic	NATURAL	TMV resistance protein N-like			NB-ARC domain	LEUCINE-RICH REPEAT-CONTAINING PROTEIN	FALSE
PA_chr01_G000019	9942	PA_chr01	4033848	snp_9942_PA_chr01:4033848	CHG	4011421	4068670	+	0	T	C	0.176732	19	PA_chr01:257696581-257696581;PA_chr01:257696936-257696936;PA_chr01:257696940-257696940;PA_chr01:257696954-257696954;PA_chr01:257696957-257696957;PA_chr01:257696980-257696980;PA_chr01:257696993-257696993;PA_chr01:257696997-257696997;PA_chr01:257697029-257697029;PA_chr01:257697033-257697033;PA_chr01:257697055-257697055;PA_chr01:257697068-257697068;PA_chr01:257697079-257697079;PA_chr01:257697083-257…	CHG;CHH;CpG	PA_chr01	257696581;257696936;257696940;257696954;257696957;257696980;257696993;257696997;257697029;257697033;257697055;257697068;257697079;257697083;257697091;257697100;257697126;257697130;257697143	genic	NATURAL	TMV resistance protein N-like			NB-ARC domain	LEUCINE-RICH REPEAT-CONTAINING PROTEIN	FALSE
PA_chr01_G000019	9942	PA_chr01	4033848	snp_9942_PA_chr01:4033848	CHH	4011421	4068670	+	0	T	C	0.176732	19	PA_chr01:257696581-257696581;PA_chr01:257696936-257696936;PA_chr01:257696940-257696940;PA_chr01:257696954-257696954;PA_chr01:257696957-257696957;PA_chr01:257696980-257696980;PA_chr01:257696993-257696993;PA_chr01:257696997-257696997;PA_chr01:257697029-257697029;PA_chr01:257697033-257697033;PA_chr01:257697055-257697055;PA_chr01:257697068-257697068;PA_chr01:257697079-257697079;PA_chr01:257697083-257…	CHG;CHH;CpG	PA_chr01	257696581;257696936;257696940;257696954;257696957;257696980;257696993;257696997;257697029;257697033;257697055;257697068;257697079;257697083;257697091;257697100;257697126;257697130;257697143	genic	NATURAL	TMV resistance protein N-like			NB-ARC domain	LEUCINE-RICH REPEAT-CONTAINING PROTEIN	FALSE
PA_chr01_G000019	9942	PA_chr01	4033848	snp_9942_PA_chr01:4033848	CHH	4011421	4068670	+	0	T	C	0.176732	19	PA_chr01:257696581-257696581;PA_chr01:257696936-257696936;PA_chr01:257696940-257696940;PA_chr01:257696954-257696954;PA_chr01:257696957-257696957;PA_chr01:257696980-257696980;PA_chr01:257696993-257696993;PA_chr01:257696997-257696997;PA_chr01:257697029-257697029;PA_chr01:257697033-257697033;PA_chr01:257697055-257697055;PA_chr01:257697068-257697068;PA_chr01:257697079-257697079;PA_chr01:257697083-257…	CHG;CHH;CpG	PA_chr01	257696581;257696936;257696940;257696954;257696957;257696980;257696993;257696997;257697029;257697033;257697055;257697068;257697079;257697083;257697091;257697100;257697126;257697130;257697143	genic	NATURAL	TMV resistance protein N-like			NB-ARC domain	LEUCINE-RICH REPEAT-CONTAINING PROTEIN	FALSE
PA_chr01_G000019	9942	PA_chr01	4033848	snp_9942_PA_chr01:4033848	CHH	4011421	4068670	+	0	T	C	0.176732	19	PA_chr01:257696581-257696581;PA_chr01:257696936-257696936;PA_chr01:257696940-257696940;PA_chr01:257696954-257696954;PA_chr01:257696957-257696957;PA_chr01:257696980-257696980;PA_chr01:257696993-257696993;PA_chr01:257696997-257696997;PA_chr01:257697029-257697029;PA_chr01:257697033-257697033;PA_chr01:257697055-257697055;PA_chr01:257697068-257697068;PA_chr01:257697079-257697079;PA_chr01:257697083-257…	CHG;CHH;CpG	PA_chr01	257696581;257696936;257696940;257696954;257696957;257696980;257696993;257696997;257697029;257697033;257697055;257697068;257697079;257697083;257697091;257697100;257697126;257697130;257697143	genic	NATURAL	TMV resistance protein N-like			NB-ARC domain	LEUCINE-RICH REPEAT-CONTAINING PROTEIN	FALSE
PA_chr01_G000019	9942	PA_chr01	4033848	snp_9942_PA_chr01:4033848	CpG	4011421	4068670	+	0	T	C	0.176732	19	PA_chr01:257696581-257696581;PA_chr01:257696936-257696936;PA_chr01:257696940-257696940;PA_chr01:257696954-257696954;PA_chr01:257696957-257696957;PA_chr01:257696980-257696980;PA_chr01:257696993-257696993;PA_chr01:257696997-257696997;PA_chr01:257697029-257697029;PA_chr01:257697033-257697033;PA_chr01:257697055-257697055;PA_chr01:257697068-257697068;PA_chr01:257697079-257697079;PA_chr01:257697083-257…	CHG;CHH;CpG	PA_chr01	257696581;257696936;257696940;257696954;257696957;257696980;257696993;257696997;257697029;257697033;257697055;257697068;257697079;257697083;257697091;257697100;257697126;257697130;257697143	genic	NATURAL	TMV resistance protein N-like			NB-ARC domain	LEUCINE-RICH REPEAT-CONTAINING PROTEIN	FALSE
PA_chr01_G000019	9942	PA_chr01	4033848	snp_9942_PA_chr01:4033848	CpG	4011421	4068670	+	0	T	C	0.176732	19	PA_chr01:257696581-257696581;PA_chr01:257696936-257696936;PA_chr01:257696940-257696940;PA_chr01:257696954-257696954;PA_chr01:257696957-257696957;PA_chr01:257696980-257696980;PA_chr01:257696993-257696993;PA_chr01:257696997-257696997;PA_chr01:257697029-257697029;PA_chr01:257697033-257697033;PA_chr01:257697055-257697055;PA_chr01:257697068-257697068;PA_chr01:257697079-257697079;PA_chr01:257697083-257…	CHG;CHH;CpG	PA_chr01	257696581;257696936;257696940;257696954;257696957;257696980;257696993;257696997;257697029;257697033;257697055;257697068;257697079;257697083;257697091;257697100;257697126;257697130;257697143	genic	NATURAL	TMV resistance protein N-like			NB-ARC domain	LEUCINE-RICH REPEAT-CONTAINING PROTEIN	FALSE
PA_chr01_G000019	9942	PA_chr01	4033848	snp_9942_PA_chr01:4033848	CpG	4011421	4068670	+	0	T	C	0.176732	19	PA_chr01:257696581-257696581;PA_chr01:257696936-257696936;PA_chr01:257696940-257696940;PA_chr01:257696954-257696954;PA_chr01:257696957-257696957;PA_chr01:257696980-257696980;PA_chr01:257696993-257696993;PA_chr01:257696997-257696997;PA_chr01:257697029-257697029;PA_chr01:257697033-257697033;PA_chr01:257697055-257697055;PA_chr01:257697068-257697068;PA_chr01:257697079-257697079;PA_chr01:257697083-257…	CHG;CHH;CpG	PA_chr01	257696581;257696936;257696940;257696954;257696957;257696980;257696993;257696997;257697029;257697033;257697055;257697068;257697079;257697083;257697091;257697100;257697126;257697130;257697143	genic	NATURAL	TMV resistance protein N-like			NB-ARC domain	LEUCINE-RICH REPEAT-CONTAINING PROTEIN	FALSE
PA_chr01_G000019	25348	PA_chr01	4033765	snp_25348_PA_chr01:4033765	CHG	4011421	4068670	+	0	G	A	0.060177	16	PA_chr01:732865283-732865283;PA_chr01:732865295-732865295;PA_chr01:732865331-732865331;PA_chr01:732865352-732865352;PA_chr01:732865378-732865378;PA_chr01:732865458-732865458;PA_chr01:732865479-732865479;PA_chr01:732865481-732865481;PA_chr01:732865487-732865487;PA_chr01:732865501-732865501;PA_chr01:732865503-732865503;PA_chr01:732865505-732865505;PA_chr01:732865616-732865616;PA_chr01:732865619-732…	CHG;CHH	PA_chr01	732865283;732865295;732865331;732865352;732865378;732865458;732865479;732865481;732865487;732865501;732865503;732865505;732865616;732865619;732865719;732865890	genic	NATURAL	TMV resistance protein N-like			NB-ARC domain	LEUCINE-RICH REPEAT-CONTAINING PROTEIN	FALSE
PA_chr01_G000019	25348	PA_chr01	4033765	snp_25348_PA_chr01:4033765	CHG	4011421	4068670	+	0	G	A	0.060177	16	PA_chr01:732865283-732865283;PA_chr01:732865295-732865295;PA_chr01:732865331-732865331;PA_chr01:732865352-732865352;PA_chr01:732865378-732865378;PA_chr01:732865458-732865458;PA_chr01:732865479-732865479;PA_chr01:732865481-732865481;PA_chr01:732865487-732865487;PA_chr01:732865501-732865501;PA_chr01:732865503-732865503;PA_chr01:732865505-732865505;PA_chr01:732865616-732865616;PA_chr01:732865619-732…	CHG;CHH	PA_chr01	732865283;732865295;732865331;732865352;732865378;732865458;732865479;732865481;732865487;732865501;732865503;732865505;732865616;732865619;732865719;732865890	genic	NATURAL	TMV resistance protein N-like			NB-ARC domain	LEUCINE-RICH REPEAT-CONTAINING PROTEIN	FALSE
PA_chr01_G000019	25348	PA_chr01	4033765	snp_25348_PA_chr01:4033765	CHH	4011421	4068670	+	0	G	A	0.060177	16	PA_chr01:732865283-732865283;PA_chr01:732865295-732865295;PA_chr01:732865331-732865331;PA_chr01:732865352-732865352;PA_chr01:732865378-732865378;PA_chr01:732865458-732865458;PA_chr01:732865479-732865479;PA_chr01:732865481-732865481;PA_chr01:732865487-732865487;PA_chr01:732865501-732865501;PA_chr01:732865503-732865503;PA_chr01:732865505-732865505;PA_chr01:732865616-732865616;PA_chr01:732865619-732…	CHG;CHH	PA_chr01	732865283;732865295;732865331;732865352;732865378;732865458;732865479;732865481;732865487;732865501;732865503;732865505;732865616;732865619;732865719;732865890	genic	NATURAL	TMV resistance protein N-like			NB-ARC domain	LEUCINE-RICH REPEAT-CONTAINING PROTEIN	FALSE
PA_chr01_G000019	25348	PA_chr01	4033765	snp_25348_PA_chr01:4033765	CHH	4011421	4068670	+	0	G	A	0.060177	16	PA_chr01:732865283-732865283;PA_chr01:732865295-732865295;PA_chr01:732865331-732865331;PA_chr01:732865352-732865352;PA_chr01:732865378-732865378;PA_chr01:732865458-732865458;PA_chr01:732865479-732865479;PA_chr01:732865481-732865481;PA_chr01:732865487-732865487;PA_chr01:732865501-732865501;PA_chr01:732865503-732865503;PA_chr01:732865505-732865505;PA_chr01:732865616-732865616;PA_chr01:732865619-732…	CHG;CHH	PA_chr01	732865283;732865295;732865331;732865352;732865378;732865458;732865479;732865481;732865487;732865501;732865503;732865505;732865616;732865619;732865719;732865890	genic	NATURAL	TMV resistance protein N-like			NB-ARC domain	LEUCINE-RICH REPEAT-CONTAINING PROTEIN	FALSE
PA_chr01_G000019	9947	PA_chr01	4033912	snp_9947_PA_chr01:4033912	CHG	4011421	4068670	+	0				15	PA_chr01:257696936-257696936;PA_chr01:257696940-257696940;PA_chr01:257696954-257696954;PA_chr01:257696957-257696957;PA_chr01:257696980-257696980;PA_chr01:257696993-257696993;PA_chr01:257696997-257696997;PA_chr01:257697055-257697055;PA_chr01:257697068-257697068;PA_chr01:257697079-257697079;PA_chr01:257697083-257697083;PA_chr01:257697091-257697091;PA_chr01:257697100-257697100;PA_chr01:257697126-257…	CHG;CHH;CpG	PA_chr01	257696936;257696940;257696954;257696957;257696980;257696993;257696997;257697055;257697068;257697079;257697083;257697091;257697100;257697126;257697143	genic	NATURAL	TMV resistance protein N-like			NB-ARC domain	LEUCINE-RICH REPEAT-CONTAINING PROTEIN	FALSE
PA_chr01_G000019	9947	PA_chr01	4033912	snp_9947_PA_chr01:4033912	CHG	4011421	4068670	+	0				15	PA_chr01:257696936-257696936;PA_chr01:257696940-257696940;PA_chr01:257696954-257696954;PA_chr01:257696957-257696957;PA_chr01:257696980-257696980;PA_chr01:257696993-257696993;PA_chr01:257696997-257696997;PA_chr01:257697055-257697055;PA_chr01:257697068-257697068;PA_chr01:257697079-257697079;PA_chr01:257697083-257697083;PA_chr01:257697091-257697091;PA_chr01:257697100-257697100;PA_chr01:257697126-257…	CHG;CHH;CpG	PA_chr01	257696936;257696940;257696954;257696957;257696980;257696993;257696997;257697055;257697068;257697079;257697083;257697091;257697100;257697126;257697143	genic	NATURAL	TMV resistance protein N-like			NB-ARC domain	LEUCINE-RICH REPEAT-CONTAINING PROTEIN	FALSE
PA_chr01_G000019	9947	PA_chr01	4033912	snp_9947_PA_chr01:4033912	CHG	4011421	4068670	+	0				15	PA_chr01:257696936-257696936;PA_chr01:257696940-257696940;PA_chr01:257696954-257696954;PA_chr01:257696957-257696957;PA_chr01:257696980-257696980;PA_chr01:257696993-257696993;PA_chr01:257696997-257696997;PA_chr01:257697055-257697055;PA_chr01:257697068-257697068;PA_chr01:257697079-257697079;PA_chr01:257697083-257697083;PA_chr01:257697091-257697091;PA_chr01:257697100-257697100;PA_chr01:257697126-257…	CHG;CHH;CpG	PA_chr01	257696936;257696940;257696954;257696957;257696980;257696993;257696997;257697055;257697068;257697079;257697083;257697091;257697100;257697126;257697143	genic	NATURAL	TMV resistance protein N-like			NB-ARC domain	LEUCINE-RICH REPEAT-CONTAINING PROTEIN	FALSE
PA_chr01_G000019	9947	PA_chr01	4033912	snp_9947_PA_chr01:4033912	CHH	4011421	4068670	+	0				15	PA_chr01:257696936-257696936;PA_chr01:257696940-257696940;PA_chr01:257696954-257696954;PA_chr01:257696957-257696957;PA_chr01:257696980-257696980;PA_chr01:257696993-257696993;PA_chr01:257696997-257696997;PA_chr01:257697055-257697055;PA_chr01:257697068-257697068;PA_chr01:257697079-257697079;PA_chr01:257697083-257697083;PA_chr01:257697091-257697091;PA_chr01:257697100-257697100;PA_chr01:257697126-257…	CHG;CHH;CpG	PA_chr01	257696936;257696940;257696954;257696957;257696980;257696993;257696997;257697055;257697068;257697079;257697083;257697091;257697100;257697126;257697143	genic	NATURAL	TMV resistance protein N-like			NB-ARC domain	LEUCINE-RICH REPEAT-CONTAINING PROTEIN	FALSE
PA_chr01_G000019	9947	PA_chr01	4033912	snp_9947_PA_chr01:4033912	CHH	4011421	4068670	+	0				15	PA_chr01:257696936-257696936;PA_chr01:257696940-257696940;PA_chr01:257696954-257696954;PA_chr01:257696957-257696957;PA_chr01:257696980-257696980;PA_chr01:257696993-257696993;PA_chr01:257696997-257696997;PA_chr01:257697055-257697055;PA_chr01:257697068-257697068;PA_chr01:257697079-257697079;PA_chr01:257697083-257697083;PA_chr01:257697091-257697091;PA_chr01:257697100-257697100;PA_chr01:257697126-257…	CHG;CHH;CpG	PA_chr01	257696936;257696940;257696954;257696957;257696980;257696993;257696997;257697055;257697068;257697079;257697083;257697091;257697100;257697126;257697143	genic	NATURAL	TMV resistance protein N-like			NB-ARC domain	LEUCINE-RICH REPEAT-CONTAINING PROTEIN	FALSE
PA_chr01_G000019	9947	PA_chr01	4033912	snp_9947_PA_chr01:4033912	CHH	4011421	4068670	+	0				15	PA_chr01:257696936-257696936;PA_chr01:257696940-257696940;PA_chr01:257696954-257696954;PA_chr01:257696957-257696957;PA_chr01:257696980-257696980;PA_chr01:257696993-257696993;PA_chr01:257696997-257696997;PA_chr01:257697055-257697055;PA_chr01:257697068-257697068;PA_chr01:257697079-257697079;PA_chr01:257697083-257697083;PA_chr01:257697091-257697091;PA_chr01:257697100-257697100;PA_chr01:257697126-257…	CHG;CHH;CpG	PA_chr01	257696936;257696940;257696954;257696957;257696980;257696993;257696997;257697055;257697068;257697079;257697083;257697091;257697100;257697126;257697143	genic	NATURAL	TMV resistance protein N-like			NB-ARC domain	LEUCINE-RICH REPEAT-CONTAINING PROTEIN	FALSE
PA_chr01_G000019	9947	PA_chr01	4033912	snp_9947_PA_chr01:4033912	CpG	4011421	4068670	+	0				15	PA_chr01:257696936-257696936;PA_chr01:257696940-257696940;PA_chr01:257696954-257696954;PA_chr01:257696957-257696957;PA_chr01:257696980-257696980;PA_chr01:257696993-257696993;PA_chr01:257696997-257696997;PA_chr01:257697055-257697055;PA_chr01:257697068-257697068;PA_chr01:257697079-257697079;PA_chr01:257697083-257697083;PA_chr01:257697091-257697091;PA_chr01:257697100-257697100;PA_chr01:257697126-257…	CHG;CHH;CpG	PA_chr01	257696936;257696940;257696954;257696957;257696980;257696993;257696997;257697055;257697068;257697079;257697083;257697091;257697100;257697126;257697143	genic	NATURAL	TMV resistance protein N-like			NB-ARC domain	LEUCINE-RICH REPEAT-CONTAINING PROTEIN	FALSE
PA_chr01_G000019	9947	PA_chr01	4033912	snp_9947_PA_chr01:4033912	CpG	4011421	4068670	+	0				15	PA_chr01:257696936-257696936;PA_chr01:257696940-257696940;PA_chr01:257696954-257696954;PA_chr01:257696957-257696957;PA_chr01:257696980-257696980;PA_chr01:257696993-257696993;PA_chr01:257696997-257696997;PA_chr01:257697055-257697055;PA_chr01:257697068-257697068;PA_chr01:257697079-257697079;PA_chr01:257697083-257697083;PA_chr01:257697091-257697091;PA_chr01:257697100-257697100;PA_chr01:257697126-257…	CHG;CHH;CpG	PA_chr01	257696936;257696940;257696954;257696957;257696980;257696993;257696997;257697055;257697068;257697079;257697083;257697091;257697100;257697126;257697143	genic	NATURAL	TMV resistance protein N-like			NB-ARC domain	LEUCINE-RICH REPEAT-CONTAINING PROTEIN	FALSE
PA_chr01_G000019	9947	PA_chr01	4033912	snp_9947_PA_chr01:4033912	CpG	4011421	4068670	+	0				15	PA_chr01:257696936-257696936;PA_chr01:257696940-257696940;PA_chr01:257696954-257696954;PA_chr01:257696957-257696957;PA_chr01:257696980-257696980;PA_chr01:257696993-257696993;PA_chr01:257696997-257696997;PA_chr01:257697055-257697055;PA_chr01:257697068-257697068;PA_chr01:257697079-257697079;PA_chr01:257697083-257697083;PA_chr01:257697091-257697091;PA_chr01:257697100-257697100;PA_chr01:257697126-257…	CHG;CHH;CpG	PA_chr01	257696936;257696940;257696954;257696957;257696980;257696993;257696997;257697055;257697068;257697079;257697083;257697091;257697100;257697126;257697143	genic	NATURAL	TMV resistance protein N-like			NB-ARC domain	LEUCINE-RICH REPEAT-CONTAINING PROTEIN	FALSE
PA_chr01_G000019	52695	PA_chr01	4033856	snp_52695_PA_chr01:4033856	CHG	4011421	4068670	+	0	T	A	0.116756	13	PA_chr01:1606429062-1606429062;PA_chr01:1606429100-1606429100;PA_chr01:1606429142-1606429142;PA_chr01:1606429143-1606429143;PA_chr01:1606429168-1606429168;PA_chr01:1606429213-1606429213;PA_chr01:1606429224-1606429224;PA_chr01:1606429288-1606429288;PA_chr01:1606429289-1606429289;PA_chr01:1606429311-1606429311;PA_chr01:1606429364-1606429364;PA_chr01:1606429375-1606429375;PA_chr01:1606429380-1606429…	CHG;CHH;CpG	PA_chr01	1606429062;1606429100;1606429142;1606429143;1606429168;1606429213;1606429224;1606429288;1606429289;1606429311;1606429364;1606429375;1606429380	genic	NATURAL	TMV resistance protein N-like			NB-ARC domain	LEUCINE-RICH REPEAT-CONTAINING PROTEIN	FALSE
PA_chr01_G000019	52695	PA_chr01	4033856	snp_52695_PA_chr01:4033856	CHG	4011421	4068670	+	0	T	A	0.116756	13	PA_chr01:1606429062-1606429062;PA_chr01:1606429100-1606429100;PA_chr01:1606429142-1606429142;PA_chr01:1606429143-1606429143;PA_chr01:1606429168-1606429168;PA_chr01:1606429213-1606429213;PA_chr01:1606429224-1606429224;PA_chr01:1606429288-1606429288;PA_chr01:1606429289-1606429289;PA_chr01:1606429311-1606429311;PA_chr01:1606429364-1606429364;PA_chr01:1606429375-1606429375;PA_chr01:1606429380-1606429…	CHG;CHH;CpG	PA_chr01	1606429062;1606429100;1606429142;1606429143;1606429168;1606429213;1606429224;1606429288;1606429289;1606429311;1606429364;1606429375;1606429380	genic	NATURAL	TMV resistance protein N-like			NB-ARC domain	LEUCINE-RICH REPEAT-CONTAINING PROTEIN	FALSE
PA_chr01_G000019	52695	PA_chr01	4033856	snp_52695_PA_chr01:4033856	CHG	4011421	4068670	+	0	T	A	0.116756	13	PA_chr01:1606429062-1606429062;PA_chr01:1606429100-1606429100;PA_chr01:1606429142-1606429142;PA_chr01:1606429143-1606429143;PA_chr01:1606429168-1606429168;PA_chr01:1606429213-1606429213;PA_chr01:1606429224-1606429224;PA_chr01:1606429288-1606429288;PA_chr01:1606429289-1606429289;PA_chr01:1606429311-1606429311;PA_chr01:1606429364-1606429364;PA_chr01:1606429375-1606429375;PA_chr01:1606429380-1606429…	CHG;CHH;CpG	PA_chr01	1606429062;1606429100;1606429142;1606429143;1606429168;1606429213;1606429224;1606429288;1606429289;1606429311;1606429364;1606429375;1606429380	genic	NATURAL	TMV resistance protein N-like			NB-ARC domain	LEUCINE-RICH REPEAT-CONTAINING PROTEIN	FALSE
PA_chr01_G000019	52695	PA_chr01	4033856	snp_52695_PA_chr01:4033856	CHH	4011421	4068670	+	0	T	A	0.116756	13	PA_chr01:1606429062-1606429062;PA_chr01:1606429100-1606429100;PA_chr01:1606429142-1606429142;PA_chr01:1606429143-1606429143;PA_chr01:1606429168-1606429168;PA_chr01:1606429213-1606429213;PA_chr01:1606429224-1606429224;PA_chr01:1606429288-1606429288;PA_chr01:1606429289-1606429289;PA_chr01:1606429311-1606429311;PA_chr01:1606429364-1606429364;PA_chr01:1606429375-1606429375;PA_chr01:1606429380-1606429…	CHG;CHH;CpG	PA_chr01	1606429062;1606429100;1606429142;1606429143;1606429168;1606429213;1606429224;1606429288;1606429289;1606429311;1606429364;1606429375;1606429380	genic	NATURAL	TMV resistance protein N-like			NB-ARC domain	LEUCINE-RICH REPEAT-CONTAINING PROTEIN	FALSE
PA_chr01_G000019	52695	PA_chr01	4033856	snp_52695_PA_chr01:4033856	CHH	4011421	4068670	+	0	T	A	0.116756	13	PA_chr01:1606429062-1606429062;PA_chr01:1606429100-1606429100;PA_chr01:1606429142-1606429142;PA_chr01:1606429143-1606429143;PA_chr01:1606429168-1606429168;PA_chr01:1606429213-1606429213;PA_chr01:1606429224-1606429224;PA_chr01:1606429288-1606429288;PA_chr01:1606429289-1606429289;PA_chr01:1606429311-1606429311;PA_chr01:1606429364-1606429364;PA_chr01:1606429375-1606429375;PA_chr01:1606429380-1606429…	CHG;CHH;CpG	PA_chr01	1606429062;1606429100;1606429142;1606429143;1606429168;1606429213;1606429224;1606429288;1606429289;1606429311;1606429364;1606429375;1606429380	genic	NATURAL	TMV resistance protein N-like			NB-ARC domain	LEUCINE-RICH REPEAT-CONTAINING PROTEIN	FALSE
PA_chr01_G000019	52695	PA_chr01	4033856	snp_52695_PA_chr01:4033856	CHH	4011421	4068670	+	0	T	A	0.116756	13	PA_chr01:1606429062-1606429062;PA_chr01:1606429100-1606429100;PA_chr01:1606429142-1606429142;PA_chr01:1606429143-1606429143;PA_chr01:1606429168-1606429168;PA_chr01:1606429213-1606429213;PA_chr01:1606429224-1606429224;PA_chr01:1606429288-1606429288;PA_chr01:1606429289-1606429289;PA_chr01:1606429311-1606429311;PA_chr01:1606429364-1606429364;PA_chr01:1606429375-1606429375;PA_chr01:1606429380-1606429…	CHG;CHH;CpG	PA_chr01	1606429062;1606429100;1606429142;1606429143;1606429168;1606429213;1606429224;1606429288;1606429289;1606429311;1606429364;1606429375;1606429380	genic	NATURAL	TMV resistance protein N-like			NB-ARC domain	LEUCINE-RICH REPEAT-CONTAINING PROTEIN	FALSE
PA_chr01_G000019	52695	PA_chr01	4033856	snp_52695_PA_chr01:4033856	CpG	4011421	4068670	+	0	T	A	0.116756	13	PA_chr01:1606429062-1606429062;PA_chr01:1606429100-1606429100;PA_chr01:1606429142-1606429142;PA_chr01:1606429143-1606429143;PA_chr01:1606429168-1606429168;PA_chr01:1606429213-1606429213;PA_chr01:1606429224-1606429224;PA_chr01:1606429288-1606429288;PA_chr01:1606429289-1606429289;PA_chr01:1606429311-1606429311;PA_chr01:1606429364-1606429364;PA_chr01:1606429375-1606429375;PA_chr01:1606429380-1606429…	CHG;CHH;CpG	PA_chr01	1606429062;1606429100;1606429142;1606429143;1606429168;1606429213;1606429224;1606429288;1606429289;1606429311;1606429364;1606429375;1606429380	genic	NATURAL	TMV resistance protein N-like			NB-ARC domain	LEUCINE-RICH REPEAT-CONTAINING PROTEIN	FALSE
PA_chr01_G000019	52695	PA_chr01	4033856	snp_52695_PA_chr01:4033856	CpG	4011421	4068670	+	0	T	A	0.116756	13	PA_chr01:1606429062-1606429062;PA_chr01:1606429100-1606429100;PA_chr01:1606429142-1606429142;PA_chr01:1606429143-1606429143;PA_chr01:1606429168-1606429168;PA_chr01:1606429213-1606429213;PA_chr01:1606429224-1606429224;PA_chr01:1606429288-1606429288;PA_chr01:1606429289-1606429289;PA_chr01:1606429311-1606429311;PA_chr01:1606429364-1606429364;PA_chr01:1606429375-1606429375;PA_chr01:1606429380-1606429…	CHG;CHH;CpG	PA_chr01	1606429062;1606429100;1606429142;1606429143;1606429168;1606429213;1606429224;1606429288;1606429289;1606429311;1606429364;1606429375;1606429380	genic	NATURAL	TMV resistance protein N-like			NB-ARC domain	LEUCINE-RICH REPEAT-CONTAINING PROTEIN	FALSE
PA_chr01_G000019	52695	PA_chr01	4033856	snp_52695_PA_chr01:4033856	CpG	4011421	4068670	+	0	T	A	0.116756	13	PA_chr01:1606429062-1606429062;PA_chr01:1606429100-1606429100;PA_chr01:1606429142-1606429142;PA_chr01:1606429143-1606429143;PA_chr01:1606429168-1606429168;PA_chr01:1606429213-1606429213;PA_chr01:1606429224-1606429224;PA_chr01:1606429288-1606429288;PA_chr01:1606429289-1606429289;PA_chr01:1606429311-1606429311;PA_chr01:1606429364-1606429364;PA_chr01:1606429375-1606429375;PA_chr01:1606429380-1606429…	CHG;CHH;CpG	PA_chr01	1606429062;1606429100;1606429142;1606429143;1606429168;1606429213;1606429224;1606429288;1606429289;1606429311;1606429364;1606429375;1606429380	genic	NATURAL	TMV resistance protein N-like			NB-ARC domain	LEUCINE-RICH REPEAT-CONTAINING PROTEIN	FALSE
PA_chr01_G000019	51353	PA_chr01	4060593	snp_51353_PA_chr01:4060593	CHG	4011421	4068670	+	0	A	G	0.0772727	12	PA_chr01:1548323175-1548323175;PA_chr01:1548323190-1548323190;PA_chr01:1548323217-1548323217;PA_chr01:1548323229-1548323229;PA_chr01:1548323233-1548323233;PA_chr01:1548323248-1548323248;PA_chr01:1548323291-1548323291;PA_chr01:1548323300-1548323300;PA_chr01:1548323313-1548323313;PA_chr01:1548323325-1548323325;PA_chr01:1548323349-1548323349;PA_chr01:1548323387-1548323387	CHG;CHH	PA_chr01	1548323175;1548323190;1548323217;1548323229;1548323233;1548323248;1548323291;1548323300;1548323313;1548323325;1548323349;1548323387	genic	NATURAL	TMV resistance protein N-like			NB-ARC domain	LEUCINE-RICH REPEAT-CONTAINING PROTEIN	FALSE
PA_chr01_G000019	51353	PA_chr01	4060593	snp_51353_PA_chr01:4060593	CHG	4011421	4068670	+	0	A	G	0.0772727	12	PA_chr01:1548323175-1548323175;PA_chr01:1548323190-1548323190;PA_chr01:1548323217-1548323217;PA_chr01:1548323229-1548323229;PA_chr01:1548323233-1548323233;PA_chr01:1548323248-1548323248;PA_chr01:1548323291-1548323291;PA_chr01:1548323300-1548323300;PA_chr01:1548323313-1548323313;PA_chr01:1548323325-1548323325;PA_chr01:1548323349-1548323349;PA_chr01:1548323387-1548323387	CHG;CHH	PA_chr01	1548323175;1548323190;1548323217;1548323229;1548323233;1548323248;1548323291;1548323300;1548323313;1548323325;1548323349;1548323387	genic	NATURAL	TMV resistance protein N-like			NB-ARC domain	LEUCINE-RICH REPEAT-CONTAINING PROTEIN	FALSE
PA_chr01_G000019	54285	PA_chr01	4033826	snp_54285_PA_chr01:4033826	CHG	4011421	4068670	+	0				12	PA_chr01:1649666708-1649666708;PA_chr01:1649666749-1649666749;PA_chr01:1649666755-1649666755;PA_chr01:1649666769-1649666769;PA_chr01:1649666773-1649666773;PA_chr01:1649666776-1649666776;PA_chr01:1649666806-1649666806;PA_chr01:1649666818-1649666818;PA_chr01:1649666831-1649666831;PA_chr01:1649666847-1649666847;PA_chr01:1649666853-1649666853;PA_chr01:1649666884-1649666884	CHG	PA_chr01	1649666708;1649666749;1649666755;1649666769;1649666773;1649666776;1649666806;1649666818;1649666831;1649666847;1649666853;1649666884	genic	NATURAL	TMV resistance protein N-like			NB-ARC domain	LEUCINE-RICH REPEAT-CONTAINING PROTEIN	FALSE
[truncated: 22,176 more rows]

## Sheet: Supp Table S7
Table S7. Annotated robust methylation sites
[truncated: 10,368 more rows]
